# Supplementary material for: Peer review of the pesticide risk assessment of the active substance tribenuron‐methyl
Source: PubMed Central journal article supplement (PMC7009932; doi:10.2903/j.efsa.2017.4912), 2017-07-28
Supplement: EFS2-15-e04912-s001.pdf [file EFS2-15-e04912-s001.pdf]

Appendix to:

EFSA (European Food Safety Authority), 2017. Conclusion on the peer review of the pesticide risk assessment of the active substance Tribenuron-methyl. EFSA Journal 2017;15(7):4912, 39 pp. doi:10.2903/j.efsa.2017.4912

© European Food Safety Authority, 2017

## Appendix A – List of end points for the active substance and the representative formulation

### Section 1 Identity, Physical and Chemical Properties, Details of Uses, Further Information, Methods of Analysis

#### Identity, Physical and Chemical Properties, Details of Uses, Further Information (Regulation (EU) N° 283/2013, Annex Part A, points 1.3 and 3.2)

|                                    |                   |
|------------------------------------|-------------------|
| Active substance (ISO Common Name) | Tribenuron-methyl |
| Function (e.g. fungicide)          | Herbicide         |
| Rapporteur Member State            | Sweden            |
| Co-rapporteur Member State         | Latvia            |

#### Identity (Regulation (EU) N° 283/2013, Annex Part A, point 1)

|                                                                                                                                           |                                                                                                 |
|-------------------------------------------------------------------------------------------------------------------------------------------|-------------------------------------------------------------------------------------------------|
| Chemical name (IUPAC)                                                                                                                     | methyl 2-[4-methoxy-6-methyl-1,3,5-triazin-2-yl(methyl)carbamoylsulfamoyl]benzoate              |
| Chemical name (CA)                                                                                                                        | methyl 2-[[[(4-methoxy-6-methyl-1,3,5-triazin-2-yl)methylamino]carbonyl]amino]sulfonyl]benzoate |
| CIPAC No                                                                                                                                  | 546.201                                                                                         |
| CAS No                                                                                                                                    | 101200-48-0                                                                                     |
| EC No (EINECS or ELINCS)                                                                                                                  | 401-190-1                                                                                       |
| FAO Specification (including year of publication)                                                                                         | FAO Specification 546/TC (January 2011)                                                         |
| Minimum purity of the active substance as manufactured                                                                                    | Minimum purity: 950 g/kg                                                                        |
| Identity of relevant impurities (of toxicological, ecotoxicological and/or environmental concern) in the active substance as manufactured | 960 g/kg                                                                                        |
| Molecular formula                                                                                                                         | open                                                                                            |
| Molar mass                                                                                                                                | C <sub>15</sub> H <sub>17</sub> N <sub>5</sub> O <sub>6</sub> S                                 |
| Structural formula                                                                                                                        | 395.4 g/mol                                                                                     |
|                                                                                                                                           | 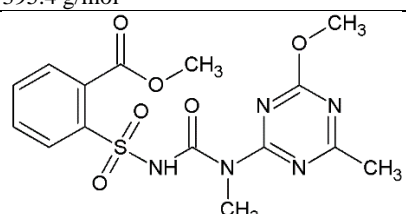            |

**Physical and chemical properties (Regulation (EU) N° 283/2013, Annex Part A, point 2)**

|                                      |                                                                                                                                                                                                                                                                                                                                                                                                                                                                                                                                                                                                     |
|--------------------------------------|-----------------------------------------------------------------------------------------------------------------------------------------------------------------------------------------------------------------------------------------------------------------------------------------------------------------------------------------------------------------------------------------------------------------------------------------------------------------------------------------------------------------------------------------------------------------------------------------------------|
| Melting point                        | 149.95°C (99.3%)<br>137.9°C (98%)                                                                                                                                                                                                                                                                                                                                                                                                                                                                                                                                                                   |
| Boiling point                        | Decomposes prior to boiling, purities 99.3% and 98%                                                                                                                                                                                                                                                                                                                                                                                                                                                                                                                                                 |
| Temperature of decomposition         | DUP: 182.55°C (99.3%), TTF: 138°C to 147°C (98%)                                                                                                                                                                                                                                                                                                                                                                                                                                                                                                                                                    |
| Appearance                           | Technical tribenuron-methyl is a white powder<br>Purified tribenuron-methyl is a white/off white powder<br>purities 99.3% and 98%                                                                                                                                                                                                                                                                                                                                                                                                                                                                   |
| Vapour pressure (20 °C)              | 5.99 x 10 <sup>-9</sup> Pa (99.3%, 20 °C, extrapolated)<br>1.0 x 10 <sup>-6</sup> Pa (99.2%, 25 °C, extrapolated)                                                                                                                                                                                                                                                                                                                                                                                                                                                                                   |
| Henry's law constant (20 °C)         | (99.3%, 20°C)<br>pH 5: 9.5 x 10 <sup>-10</sup> Pa/m <sup>3</sup> /mol<br>pH 9: <1.33 x 10 <sup>-10</sup> Pa/m <sup>3</sup> /mol<br><br>1.42 x 10 <sup>-6</sup> Pa.m <sup>3</sup> /mol (99.2%, 20°C)                                                                                                                                                                                                                                                                                                                                                                                                 |
| Solubility in water                  | 99.3%, 20 °C:<br>Unbuffered distilled: 0.019 ± 0.002 g/L<br>pH 5, unstable<br>pH 7, 2.483 ± 0.600 g/L<br>pH 9, >17.85 g/L<br><br>99.2%, 20 °C:<br>Unbuffered distilled: 0.028 g/L<br>pH 7, 1660 mg/L<br>pH 10, > 250 g/L<br><br>Data for pH 4 not reported here since it may not be valid (i.e. due to hydrolysis)                                                                                                                                                                                                                                                                                  |
| Solubility in organic solvents       | Solvent                      Solubility (97.76 %) (mg/L)<br>acetone                      3.91 x 10 <sup>4</sup> mg/L<br>acetonitrile                4.64 x 10 <sup>4</sup> mg/L<br>1-octanol                    3.83 x 10 <sup>2</sup> mg/L<br><i>o</i> -xylene                    1.31 x 10 <sup>4</sup> mg/L<br>dimethylformamide      9.82 x 10 <sup>4</sup> mg/L<br>ethyl acetate               1.63 x 10 <sup>4</sup> mg/L<br><i>n</i> -heptane                    2.08 x 10 <sup>1</sup> mg/L<br>methanol                    2.59 x 10 <sup>3</sup> mg/L<br>dichloromethane        > 250 g/kg |
| Surface tension                      | 73.0 ± 0.0 mN/m (90 % saturated solution, 19.6 ± 0.1°C, 97.4%)<br>71.0 mN/m (90 % saturated solution, 20°C, 99.2%)                                                                                                                                                                                                                                                                                                                                                                                                                                                                                  |
| Partition coefficient                | 99.3%, 20 °C:<br>Unbuffered distilled: 0.85 ± 0.03<br>pH acidic, unstable<br>pH 7, log P <sub>ow</sub> = 0.38 ± 0.01<br>pH 9, log P <sub>ow</sub> = 0.93 ± 0.01<br><br>99.2%, 20 °C:<br>pH 7, log P <sub>ow</sub> = -0.46<br>pH 9, log P <sub>ow</sub> = -2.22<br><br>Data for pH 4 not reported here since it may not be valid (i.e. due to hydrolysis)                                                                                                                                                                                                                                            |
| Dissociation constant (state purity) | pKa = 4.65 ± 0.20 at 20°C (99.3%)<br>pKa = 4.6 at 20°C (99.2%)                                                                                                                                                                                                                                                                                                                                                                                                                                                                                                                                      |

UV/VIS absorption (max.) incl.  $\epsilon$   
(state purity, pH)

Purity 97.76%  
pH: 1.66  
 $\epsilon = 4.172 \times 10^4$  (log  $\epsilon = 4.62$ ) at 200 nm.  
 $\epsilon = 2.073 \times 10^4$  (log  $\epsilon = 4.32$ ) at 231 nm  
 $\epsilon = 3.962 \times 10^2$  (log  $\epsilon = 2.60$ ) at 290 nm (methanol)  
pH: 7.00  
 $\epsilon = 3.732 \times 10^4$  (log  $\epsilon = 4.57$ ) at 201 nm.  
 $\epsilon = 1.804 \times 10^4$  (log  $\epsilon = 4.26$ ) at 256 nm  
 $\epsilon = 3.424 \times 10^2$  (log  $\epsilon = 2.53$ ) at 290 nm  
pH: 11.72  
 $\epsilon = 2.376 \times 10^4$  (log  $\epsilon = 4.38$ ) at 208 nm.  
 $\epsilon = 1.720 \times 10^4$  (log  $\epsilon = 4.24$ ) at 256 nm  
 $\epsilon = 3.344 \times 10^2$  (log  $\epsilon = 2.52$ ) at 290 nm

Purity 98.1%  
pH: 1.50  
 $\epsilon = 19881.7$  at 202 nm.  
 $\epsilon = 16446.1$  at 213 nm  
 $\epsilon = 19938.0$  at 225 nm  
pH: 5.88  
 $\epsilon = 32779.5$  at 197 nm.  
 $\epsilon = 17516.2$  at 212 nm  
 $\epsilon = 21824.8$  at 220 nm  
pH: 12.32  
 $\epsilon = 2956.9$  at 212 nm.  
 $\epsilon = 12785.1$  at 228 nm  
 $\epsilon = 3942.6$  at 251 nm

non-flammable (97.8%)

not explosive (97.8%)

not oxidising (99.3%, and technical)

Flammability (state purity)

Explosive properties (state purity)

Oxidising properties (state purity)

**Summary of representative uses evaluated, for which all risk assessments needed to be completed (tribenuron-methyl)  
 (Regulation (EU) N° 284/2013, Annex Part A, points 3, 4) – relevant to applicant DuPont de Nemours (Deutschland) GmbH**

| Crop and/or situation (a)                                                          | Member State or Country | Product name                       | F G or I (b) | Pests or Group of pests controlled (c) | Preparation |                     | Application                  |                                          |                    |                                    | Application rate per treatment |                    |                       | PHI (days) (m)                                                                                                 | Remarks                                                                                                                                        |
|------------------------------------------------------------------------------------|-------------------------|------------------------------------|--------------|----------------------------------------|-------------|---------------------|------------------------------|------------------------------------------|--------------------|------------------------------------|--------------------------------|--------------------|-----------------------|----------------------------------------------------------------------------------------------------------------|------------------------------------------------------------------------------------------------------------------------------------------------|
|                                                                                    |                         |                                    |              |                                        | Type (d-f)  | Conc. a.s. g/kg (i) | method kind (f-h)            | Range of growth stages & season (j)      | Number min-max (k) | Interval between application (min) | kg a.s./hL min-max (l)         | Water L/ha min-max | g a.s./ha min-max (l) |                                                                                                                |                                                                                                                                                |
| Spring Cereals without underlay [wheat, barley, oat, rye, triticale, durum]        | EU                      | Tribenuron methyl 50SG (DPX-L5300) | F            | Broadleaf weeds                        | SG          | 500                 | Broadcast foliar application | BBCH 30-39                               | 1                  | n/a                                |                                | 100-400            | 22.5                  | Do not apply after BBCH 39. PHI n/a when harvest at maturity. 28 for harvest as forage/silage before maturity. | DUP<br>With or without non-ionic surfactant (i.e. Trend® 90 0.05-0.1% v/v) Cereals harvested at maturity or before maturity for forage/silage. |
| Winter Cereals without underlay [wheat, barley, rye, triticale, oat, durum, spelt] | EU                      | Tribenuron methyl 50SG (DPX-L5300) | F            | Broadleaf weeds                        | SG          | 500                 | Broadcast foliar application | BBCH 30-39<br>Spring application         | 1                  | n/a                                |                                | 100-500            | 24                    | Do not apply after BBCH 39. PHI n/a when harvest at maturity. 28 for harvest as forage/silage before maturity. | DUP<br>With or without non-ionic surfactant (i.e. Trend® 90 0.05-0.1% v/v) Cereals harvested at maturity or before maturity for forage/silage. |
| Spring and winter cereals with underlay (grass for feed or seed)                   | EU                      | Tribenuron methyl 50SG (DPX-L5300) | F            | Broadleaf weeds                        | SG          | 500                 | Broadcast foliar application | Cereals: BBCH 30-39<br>Grass: BBCH 12-13 | 1                  | n/a                                |                                | 100-400            | 7.5                   | Do not apply after BBCH 39. PHI n/a when harvest at maturity. 28 for                                           | DUP<br>With non-ionic surfactant (i.e. Trend® 90 0.05% v/v) Cereals                                                                            |

| Crop and/or situation (a)                                                                                 | Member State or Country | Product name                       | F G or I (b) | Pests or Group of pests controlled (c) | Preparation |                     | Application                  |                                                                  |                    |                                    | Application rate per treatment |                    |                       | PHI (days) (m)                                                                                                  | Remarks                                                                                                                                                                                    |
|-----------------------------------------------------------------------------------------------------------|-------------------------|------------------------------------|--------------|----------------------------------------|-------------|---------------------|------------------------------|------------------------------------------------------------------|--------------------|------------------------------------|--------------------------------|--------------------|-----------------------|-----------------------------------------------------------------------------------------------------------------|--------------------------------------------------------------------------------------------------------------------------------------------------------------------------------------------|
|                                                                                                           |                         |                                    |              |                                        | Type (d-f)  | Conc. a.s. g/kg (i) | method kind (f-h)            | Range of growth stages & season (j)                              | Number min-max (k) | Interval between application (min) | kg a.s./hL min-max (l)         | Water L/ha min-max | g a.s./ha min-max (l) |                                                                                                                 |                                                                                                                                                                                            |
| [wheat, barley, oat, rye, triticale, durum]                                                               |                         |                                    |              |                                        |             |                     |                              | Spring application                                               |                    |                                    |                                |                    |                       | harvest as forage/ silage before maturity.                                                                      | harvested at maturity or before maturity for forage/ silage. Insown are harvested for feed in September-October year 1.                                                                    |
| Spring and winter cereals with underlay (red clover for feed) [wheat, barley, oat, rye, triticale, durum] | EU                      | Tribenuron methyl 50SG (DPX-L5300) | F            | Broadleaf weeds                        | SG          | 500                 | Broadcast foliar application | Cereals: BBCH 30-39<br>Red clover: BBCH 11<br>Spring application | 1                  | n/a                                |                                | 100-400            | 5.5                   | Do not apply after BBCH 39. PHI n/a when harvest at maturity. 28 for harvest as forage/ silage before maturity. | DUP<br>With non-ionic surfactant (i.e. Trend® 90 0.05% v/v) Cereals harvested at maturity or before maturity for forage/ silage. Insown are harvested for feed in September-October year 1 |
| Pasture (Grass only)                                                                                      | EU                      | Tribenuron methyl 50SG (DPX-L5300) | F            | Broadleaf weeds                        | SG          | 500                 | Broadcast foliar application | BBCH 59<br>Spring application                                    | 1                  | n/a                                |                                | 100-300            | 7.5                   | 28                                                                                                              | DUP<br>With non-ionic surfactant (i.e. Trend® 90 0.05% v/v)                                                                                                                                |
| Sunflower (Tribenuron methyl)                                                                             | EU                      | Tribenuron methyl 50SG             | F            | Broadleaf weeds                        | SG          | 500                 | Broadcast foliar application | BBCH 12-18                                                       | 1                  | n/a                                |                                | 100-400            | 30                    | 30                                                                                                              | DUP<br>With non-ionic                                                                                                                                                                      |

| Crop and/or situation (a)                                                                                                                                                                                                                                                                                                                                                                                                                                                                                                                                                                                                                                                                                                                                                                                                                                           | Member State or Country | Product name                       | F G or I (b) | Pests or Group of pests controlled (c) | Preparation |                     | Application                  |                                     |                    |                                                                                                                                                                                                                                                                                                                                                                                                                                                                                                                                                                                                                                                                                                                                                                                                                                                                                                                                                                                                                                                                                                                                               | Application rate per treatment |                    |                       | PHI (days) (m) | Remarks                                                                                                                                                   |
|---------------------------------------------------------------------------------------------------------------------------------------------------------------------------------------------------------------------------------------------------------------------------------------------------------------------------------------------------------------------------------------------------------------------------------------------------------------------------------------------------------------------------------------------------------------------------------------------------------------------------------------------------------------------------------------------------------------------------------------------------------------------------------------------------------------------------------------------------------------------|-------------------------|------------------------------------|--------------|----------------------------------------|-------------|---------------------|------------------------------|-------------------------------------|--------------------|-----------------------------------------------------------------------------------------------------------------------------------------------------------------------------------------------------------------------------------------------------------------------------------------------------------------------------------------------------------------------------------------------------------------------------------------------------------------------------------------------------------------------------------------------------------------------------------------------------------------------------------------------------------------------------------------------------------------------------------------------------------------------------------------------------------------------------------------------------------------------------------------------------------------------------------------------------------------------------------------------------------------------------------------------------------------------------------------------------------------------------------------------|--------------------------------|--------------------|-----------------------|----------------|-----------------------------------------------------------------------------------------------------------------------------------------------------------|
|                                                                                                                                                                                                                                                                                                                                                                                                                                                                                                                                                                                                                                                                                                                                                                                                                                                                     |                         |                                    |              |                                        | Type (d-f)  | Conc. a.s. g/kg (i) | method kind (f-h)            | Range of growth stages & season (j) | Number min-max (k) | Interval between application (min)                                                                                                                                                                                                                                                                                                                                                                                                                                                                                                                                                                                                                                                                                                                                                                                                                                                                                                                                                                                                                                                                                                            | kg a.s./hL min-max (l)         | Water L/ha min-max | g a.s./ha min-max (l) |                |                                                                                                                                                           |
| tolerant varieties)                                                                                                                                                                                                                                                                                                                                                                                                                                                                                                                                                                                                                                                                                                                                                                                                                                                 |                         | (DPX-L5300)                        |              |                                        |             |                     |                              | Spring application                  |                    |                                                                                                                                                                                                                                                                                                                                                                                                                                                                                                                                                                                                                                                                                                                                                                                                                                                                                                                                                                                                                                                                                                                                               |                                |                    |                       |                | surfactant (i.e. Trend® 90 0.1% v/v)                                                                                                                      |
| Olive                                                                                                                                                                                                                                                                                                                                                                                                                                                                                                                                                                                                                                                                                                                                                                                                                                                               | EU                      | Tribenuron methyl 50SG (DPX-L5300) | F            | Broadleaf weeds                        | SG          | 500                 | Broadcast foliar application | Early spring application            | 1                  | n/a                                                                                                                                                                                                                                                                                                                                                                                                                                                                                                                                                                                                                                                                                                                                                                                                                                                                                                                                                                                                                                                                                                                                           |                                | 100-500            | 20                    | 28             | DUP<br><br>Downward directed broadcast foliar application within the access rows. <sup>1</sup><br><br>With non-ionic surfactant (i.e. Trend® 90 0.1% v/v) |
| <p>(a) For crops, the EU and Codex classifications (both) should be taken into account; where relevant, the use situation should be described (e.g. fumigation of a structure)</p> <p>(b) Outdoor or field use (F), greenhouse application (G) or indoor application (I)</p> <p>(c) e.g. biting and sucking insects, soil born insects, foliar fungi, weeds</p> <p>(d) e.g. wettable powder (WP), emulsifiable concentrate (EC), granule (GR)</p> <p>(e) CropLife International Technical Monograph no 2, 6th Edition. Revised May 2008. Catalogue of pesticide</p> <p>(f) All abbreviations used must be explained</p> <p>(g) Method, e.g. high volume spraying, low volume spraying, spreading, dusting, drench</p> <p>(h) Kind, e.g. overall, broadcast, aerial spraying, row, individual plant, between the plant- type of equipment used must be indicated</p> |                         |                                    |              |                                        |             |                     |                              |                                     |                    | <p>(i) g/kg or g/L. Normally the rate should be given for the active substance (according to ISO) and not for the variant in order to compare the rate for same active substances used in different variants (e.g. fluoroxypryr). In certain cases, where only one variant is synthesised, it is more appropriate to give the rate for the variant (e.g. benthialivalcarb-isopropyl).</p> <p>(j) Growth stage range from first to last treatment (BBCH Monograph, Growth Stages of Plants, 1997, Blackwell, ISBN 3-8263-3152-4), including where relevant, information on season at time of application</p> <p>(k) Indicate the minimum and maximum number of applications possible under practical conditions of use</p> <p>(l) The values should be given in g or kg whatever gives the more manageable number (e.g. 200 kg/ha instead of 200 000 g/ha or 12.5 g/ha instead of 0.0125 kg/ha)</p> <p>(m) PHI - minimum pre-harvest interval</p> <p><sup>1</sup> The downward broadcast foliar application is for treatment of the weeds under the trees within the access rows (i.e. not for treatment of the leaves of the olive trees)</p> |                                |                    |                       |                |                                                                                                                                                           |

**Summary of representative uses evaluated, for which all risk assessments needed to be completed (tribenuron-methyl) (Regulation (EU) N° 284/2013, Annex Part A, points 3, 4) – relevant to applicant EU Tribenuron AIR 3 Task Force**

| Crop and/or situation (a)                                                                                                                                                                                                                                                                                                                                                                                                                                                                                                                                                                                                                                                                                                                                                                                                        | Member State or Country | Product name                             | F G or I (b) | Pests or Group of pests controlled (c) | Preparation |                | Application       |                                     |                                                                                                                                                                                                                                                                                                                                                                                                                                                                                                                                                                                                                                                                                                                                                                                                                                                                                                                          |                                    | Application rate per treatment |                    |                       | PHI (days) (m) | Remarks                   |
|----------------------------------------------------------------------------------------------------------------------------------------------------------------------------------------------------------------------------------------------------------------------------------------------------------------------------------------------------------------------------------------------------------------------------------------------------------------------------------------------------------------------------------------------------------------------------------------------------------------------------------------------------------------------------------------------------------------------------------------------------------------------------------------------------------------------------------|-------------------------|------------------------------------------|--------------|----------------------------------------|-------------|----------------|-------------------|-------------------------------------|--------------------------------------------------------------------------------------------------------------------------------------------------------------------------------------------------------------------------------------------------------------------------------------------------------------------------------------------------------------------------------------------------------------------------------------------------------------------------------------------------------------------------------------------------------------------------------------------------------------------------------------------------------------------------------------------------------------------------------------------------------------------------------------------------------------------------------------------------------------------------------------------------------------------------|------------------------------------|--------------------------------|--------------------|-----------------------|----------------|---------------------------|
|                                                                                                                                                                                                                                                                                                                                                                                                                                                                                                                                                                                                                                                                                                                                                                                                                                  |                         |                                          |              |                                        | Type (d-f)  | Conc. a.s. (i) | method kind (f-h) | Range of growth stages & season (j) | Number min-max (k)                                                                                                                                                                                                                                                                                                                                                                                                                                                                                                                                                                                                                                                                                                                                                                                                                                                                                                       | Interval between application (min) | kg a.s./hL min-max (l)         | Water L/ha min-max | g a.s./ha min-max (l) |                |                           |
| Winter cereals                                                                                                                                                                                                                                                                                                                                                                                                                                                                                                                                                                                                                                                                                                                                                                                                                   | EU                      | Tribenuron-methyl 750 g/kg WG (CHA 6310) | F            | Annual broad leaved weeds              | WG          | 750            | Foliar spray      | BBCH 12-29                          | 1                                                                                                                                                                                                                                                                                                                                                                                                                                                                                                                                                                                                                                                                                                                                                                                                                                                                                                                        | n/a                                |                                | 100-400            | 15                    | n.a.           | TTF<br>Autumn application |
| Winter cereals                                                                                                                                                                                                                                                                                                                                                                                                                                                                                                                                                                                                                                                                                                                                                                                                                   | EU                      | Tribenuron-methyl 750 g/kg WG (CHA 6310) | F            | Annual broad leaved weeds              | WG          | 750            | Foliar spray      | BBCH 12-39                          | 1                                                                                                                                                                                                                                                                                                                                                                                                                                                                                                                                                                                                                                                                                                                                                                                                                                                                                                                        | n/a                                |                                | 100-400            | 30                    | n.a.           | TTF<br>Spring application |
| Spring cereals                                                                                                                                                                                                                                                                                                                                                                                                                                                                                                                                                                                                                                                                                                                                                                                                                   | EU                      | Tribenuron-methyl 750 g/kg WG (CHA 6310) | F            | Annual broad leaved weeds              | WG          | 750            | Foliar spray      | BBCH 12-39                          | 1                                                                                                                                                                                                                                                                                                                                                                                                                                                                                                                                                                                                                                                                                                                                                                                                                                                                                                                        | n/a                                |                                | 100-400            | 30                    | n.a.           | TTF<br>Spring application |
| (a) For crops, the EU and Codex classifications (both) should be taken into account; where relevant, the use situation should be described (e.g. fumigation of a structure)<br>(b) Outdoor or field use (F), greenhouse application (G) or indoor application (I)<br>(c) e.g. biting and sucking insects, soil born insects, foliar fungi, weeds<br>(d) e.g. wettable powder (WP), emulsifiable concentrate (EC), granule (GR)<br>(e) CropLife International Technical Monograph no 2, 6th Edition. Revised May 2008. Catalogue of pesticide<br>(f) All abbreviations used must be explained<br>(g) Method, e.g. high volume spraying, low volume spraying, spreading, dusting, drench<br>(h) Kind, e.g. overall, broadcast, aerial spraying, row, individual plant, between the plant- type of equipment used must be indicated |                         |                                          |              |                                        |             |                |                   |                                     | (i) g/kg or g/L. Normally the rate should be given for the active substance (according to ISO) and not for the variant in order to compare the rate for same active substances used in different variants (e.g. fluoroxypryr). In certain cases, where only one variant is synthesised, it is more appropriate to give the rate for the variant (e.g. benthialvalicarb-isopropyl).<br>(j) Growth stage range from first to last treatment (BBCH Monograph, Growth Stages of Plants, 1997, Blackwell, ISBN 3-8263-3152-4), including where relevant, information on season at time of application<br>(k) Indicate the minimum and maximum number of applications possible under practical conditions of use<br>(l) The values should be given in g or kg whatever gives the more manageable number (e.g. 200 kg/ha instead of 200 000 g/ha or 12.5 g/ha instead of 0.0125 kg/ha<br>(m) PHI - minimum pre-harvest interval |                                    |                                |                    |                       |                |                           |

**Summary of additional intended uses for which MRL applications have been made, that in addition to the uses above, have also been considered in the consumer risk assessment (tribenuron-methyl)**

Regulation (EC) N° 1107/2009 Article 8.1(g)

Important note: efficacy, environmental risk and risk to humans by exposure other than via their diet have not been assessed for these uses

| Crop and/or situation (a)                                                                                                                                                                                                                                                                                                                                                                                                                                                                                                                                                                                                                                                                                                                                                                                                                                                                                                                                                                                                                                                                                                                                                                                                                                                                                                                                                                                                                                                                                                                                                                                                                                                                                                                                                                                         | Member State or Country | Product name | F G or I (b) | Pests or Group of pests controlled (c) | Preparation |                | Application       |                                     |                    |                                    | Application rate per treatment |                    |                        | PHI (days) (m) | Remarks |
|-------------------------------------------------------------------------------------------------------------------------------------------------------------------------------------------------------------------------------------------------------------------------------------------------------------------------------------------------------------------------------------------------------------------------------------------------------------------------------------------------------------------------------------------------------------------------------------------------------------------------------------------------------------------------------------------------------------------------------------------------------------------------------------------------------------------------------------------------------------------------------------------------------------------------------------------------------------------------------------------------------------------------------------------------------------------------------------------------------------------------------------------------------------------------------------------------------------------------------------------------------------------------------------------------------------------------------------------------------------------------------------------------------------------------------------------------------------------------------------------------------------------------------------------------------------------------------------------------------------------------------------------------------------------------------------------------------------------------------------------------------------------------------------------------------------------|-------------------------|--------------|--------------|----------------------------------------|-------------|----------------|-------------------|-------------------------------------|--------------------|------------------------------------|--------------------------------|--------------------|------------------------|----------------|---------|
|                                                                                                                                                                                                                                                                                                                                                                                                                                                                                                                                                                                                                                                                                                                                                                                                                                                                                                                                                                                                                                                                                                                                                                                                                                                                                                                                                                                                                                                                                                                                                                                                                                                                                                                                                                                                                   |                         |              |              |                                        | Type (d-f)  | Conc. a.s. (i) | method kind (f-h) | Range of growth stages & season (j) | Number min-max (k) | Interval between application (min) | kg a.s./ha min-max (l)         | Water L/ha min-max | kg a.s./ha min-max (l) |                |         |
| MRL Application (according to Article 8.1(g) of Regulation (EC) No 1107/2009)                                                                                                                                                                                                                                                                                                                                                                                                                                                                                                                                                                                                                                                                                                                                                                                                                                                                                                                                                                                                                                                                                                                                                                                                                                                                                                                                                                                                                                                                                                                                                                                                                                                                                                                                     |                         |              |              |                                        |             |                |                   |                                     |                    |                                    |                                |                    |                        |                |         |
| <b>Additional intended uses were not considered</b>                                                                                                                                                                                                                                                                                                                                                                                                                                                                                                                                                                                                                                                                                                                                                                                                                                                                                                                                                                                                                                                                                                                                                                                                                                                                                                                                                                                                                                                                                                                                                                                                                                                                                                                                                               |                         |              |              |                                        |             |                |                   |                                     |                    |                                    |                                |                    |                        |                |         |
|                                                                                                                                                                                                                                                                                                                                                                                                                                                                                                                                                                                                                                                                                                                                                                                                                                                                                                                                                                                                                                                                                                                                                                                                                                                                                                                                                                                                                                                                                                                                                                                                                                                                                                                                                                                                                   |                         |              |              |                                        |             |                |                   |                                     |                    |                                    |                                |                    |                        |                |         |
|                                                                                                                                                                                                                                                                                                                                                                                                                                                                                                                                                                                                                                                                                                                                                                                                                                                                                                                                                                                                                                                                                                                                                                                                                                                                                                                                                                                                                                                                                                                                                                                                                                                                                                                                                                                                                   |                         |              |              |                                        |             |                |                   |                                     |                    |                                    |                                |                    |                        |                |         |
| <p>(a) For crops, the EU and Codex classifications (both) should be taken into account; where relevant, the use situation should be described (e.g. fumigation of a structure)</p> <p>(b) Outdoor or field use (F), greenhouse application (G) or indoor application (I)</p> <p>(c) e.g. biting and sucking insects, soil born insects, foliar fungi, weeds</p> <p>(d) e.g. wettable powder (WP), emulsifiable concentrate (EC), granule (GR)</p> <p>(e) CropLife International Technical Monograph no 2, 6th Edition. Revised May 2008. Catalogue of pesticide</p> <p>(f) All abbreviations used must be explained</p> <p>(g) Method, e.g. high volume spraying, low volume spraying, spreading, dusting, drench</p> <p>(h) Kind, e.g. overall, broadcast, aerial spraying, row, individual plant, between the plant- type of equipment used must be indicated</p> <p>(i) g/kg or g/L. Normally the rate should be given for the active substance (according to ISO) and not for the variant in order to compare the rate for same active substances used in different variants (e.g. fluoroxypry). In certain cases, where only one variant is synthesised, it is more appropriate to give the rate for the variant (e.g. benthiavalicarb-isopropyl).</p> <p>(j) Growth stage range from first to last treatment (BBCH Monograph, Growth Stages of Plants, 1997, Blackwell, ISBN 3-8263-3152-4), including where relevant, information on season at time of application</p> <p>(k) Indicate the minimum and maximum number of applications possible under practical conditions of use</p> <p>(l) The values should be given in g or kg whatever gives the more manageable number (e.g. 200 kg/ha instead of 200 000 g/ha or 12.5 g/ha instead of 0.0125 kg/ha</p> <p>(m) PHI - minimum pre-harvest interval</p> |                         |              |              |                                        |             |                |                   |                                     |                    |                                    |                                |                    |                        |                |         |



**Further information, Efficacy****Effectiveness (Regulation (EU) N° 284/2013, Annex Part A, point 6.2)**

|                                                                                                                                                                                                                                      |
|--------------------------------------------------------------------------------------------------------------------------------------------------------------------------------------------------------------------------------------|
| <p>No data provided – not required<br/>         The representative formulations with their efficacy packages have been authorized in EU in compliance with Regulation (EC) No 1107/2009 and according to the Uniform Principles.</p> |
|--------------------------------------------------------------------------------------------------------------------------------------------------------------------------------------------------------------------------------------|

**Adverse effects on field crops (Regulation (EU) N° 284/2013, Annex Part A, point 6.4)**

|                                            |
|--------------------------------------------|
| No adverse effects on field crops reported |
|--------------------------------------------|

**Observations on other undesirable or unintended side-effects (Regulation (EU) N° 284/2013, Annex Part A, point 6.5)**

|                                                                                                                                                                                                                                                                                                                                                                                                                                                                                 |
|---------------------------------------------------------------------------------------------------------------------------------------------------------------------------------------------------------------------------------------------------------------------------------------------------------------------------------------------------------------------------------------------------------------------------------------------------------------------------------|
| <p>Two rotational crops field trials conducted on lettuce, radish and barley with a bare soil application of 30 g a.s/ha were also submitted. Considering the genotoxic potential of the metabolites IN-L5296 and IN-A4098, sufficient rotational crop field trials conducted on cereals, leafy vegetables and root vegetables and at a dose rate covering the plateau concentration in the soil for the relevant metabolites IN-L5296 and IN-A4098 are required (data gap)</p> |
|---------------------------------------------------------------------------------------------------------------------------------------------------------------------------------------------------------------------------------------------------------------------------------------------------------------------------------------------------------------------------------------------------------------------------------------------------------------------------------|

**Groundwater metabolites: Screening for biological activity (SANCO/221/2000-rev.10-final Step 3 a Stage 1)**

Activity against target organism

|                                                  |                                                  |                         |
|--------------------------------------------------|--------------------------------------------------|-------------------------|
| IN-A4098<br>( <i>N</i> -demethyl-triazine amine) | IN-R9805<br>( <i>O</i> -demethyl-triazine amine) | IN-00581<br>(saccharin) |
| no                                               | no                                               | no                      |

## Methods of Analysis

### Analytical methods for the active substance (Regulation (EU) N° 283/2013, Annex Part A, point 4.1 and Regulation (EU) N° 284/2013, Annex Part A, point 5.2)

|                                                     |         |
|-----------------------------------------------------|---------|
| Technical a.s. (analytical technique)               | HPLC-UV |
| Impurities in technical a.s. (analytical technique) | HPLC-UV |
| Plant protection product (analytical technique)     | HPLC-UV |

### Analytical methods for residues (Regulation (EU) N° 283/2013, Annex Part A, point 4.2 & point 7.4.2)

#### Residue definitions for monitoring purposes

|                         |                                |
|-------------------------|--------------------------------|
| Food of plant origin    | Tribenuron-methyl              |
| Food of animal origin   | Tribenuron-methyl              |
| Soil                    | Tribenuron-methyl and IN-L5296 |
| Sediment                | Tribenuron-methyl              |
| Water surface           | Tribenuron-methyl              |
| drinking/ground         | Tribenuron-methyl              |
| Air                     | Tribenuron-methyl              |
| Body fluids and tissues | Tribenuron-methyl              |

#### Monitoring/Enforcement methods

|                                                                                               |                                                                                                                                                                                                                                                                                                                                                                                                                      |
|-----------------------------------------------------------------------------------------------|----------------------------------------------------------------------------------------------------------------------------------------------------------------------------------------------------------------------------------------------------------------------------------------------------------------------------------------------------------------------------------------------------------------------|
| Food/feed of plant origin (analytical technique and LOQ for methods for monitoring purposes)  | <p>DUP: KCA 4.2/09 (Henze, R.M., Stry, J.J., 2013), LC-MS/MS, 0.01 mg/kg</p> <p>DUP (not acidic crops): KCA 4.2/15 (Pentz, A.M., Bramble Jr., F.Q., 2005), KCA 4.2/02 (Devine, T., Nanita, S., 2007a), and KCA 4.2/03 (Devine, T., Nanita, S., 2007b), LC-MS/MS, 0.01 mg/kg</p> <p>TFF: KCA 4.2/01 (Knoch, E., 2006), LC-MS/MS, 0.01 mg/kg</p>                                                                       |
| Food/feed of animal origin (analytical technique and LOQ for methods for monitoring purposes) | <p>Analysis of tribenuron-methyl:<br/>DUP: KCA 4.2/07 (Henze, R.M., Stry, J.J., 2007), LC-MS/MS, 0.01 mg/kg in milk</p> <p>DUP: KCA 4.2/08 (Henze, R.M., Stry, J.J., 2007), LC-MS/MS, 0.01 mg/kg in eggs</p> <p>DUP: KCA 4.2/16 (Pentz, A.M., Cabusas, M.E.Y., 2012), LC-MS/MS, 0.01 mg/kg in animal tissues</p>                                                                                                     |
| Soil (analytical technique and LOQ)                                                           | <p>Analysis of tribenuron-methyl:<br/>DUP: KCA 4.2/13 (Hill, S.J., Stry, J.J., 2001), LC-MS/MS, 0.05 µg/kg</p> <p>TFF: KCA 4.2/05 (Lakaschus, S., 2007), LC-MS/MS, 0.05 µg/kg</p> <p>Analysis of tribenuron-methyl and IN-L5296 (and several other metabolites):<br/>DUP: KCA 4.1.2/05 (Hill, S.J., Stry, J.J., 2001), ILV (tribenuron-methyl and IN-L5296): KCA 4.1.2/08 (Pope C., 2001):<br/>LC-MS/MS, 1 µg/kg</p> |
| Water (analytical technique and LOQ)                                                          | <p>DUP: KCA 4.2/04 (Gagnon, M.R., Stry, J.J., 2001), LC-MS/MS, 0.05 µg/L</p> <p>TFF: KCA 4.2/06 (Weber, H., 2010), LC-MS/MS, 0.01 µg/L</p>                                                                                                                                                                                                                                                                           |

|                                                        |                                                                                                                                                                                                                                                                             |
|--------------------------------------------------------|-----------------------------------------------------------------------------------------------------------------------------------------------------------------------------------------------------------------------------------------------------------------------------|
| Air (analytical technique and LOQ)                     | DUP: KCA 4.2 (Class T., Hausmann, S., 2000),<br>HPLC-UV, 1.5 µg/m <sup>3</sup><br><br>TFF: KCA 4.2/08 (Airs, D. , 2015),<br>LC-MS/MS, 21.0 µg/m <sup>3</sup> (required LOQ 15 µg/m <sup>3</sup> )<br>Data gap for additional validation data identified for formal reasons. |
| Body fluids and tissues (analytical technique and LOQ) | DUP: KCA 4.2/16 (Pentz, A.M., Cabusas, M.E.Y., 2012),<br>LC-MS/MS, 0.01 mg/kg in body tissues<br>DUP: KCA, 4.2/25 (Henze, R.M., Stry, J.J. 2016a),<br>LC-MS/MS, 1 µg/kg (plasma), 3 µg/kg (urine)                                                                           |

### Classification and labelling with regard to physical and chemical data (Regulation (EU) N° 283/2013, Annex Part A, point 10)

|                                                                                                                                                                                                                                                                                                                           |                                                                                                                                                                                                            |                   |      |      |
|---------------------------------------------------------------------------------------------------------------------------------------------------------------------------------------------------------------------------------------------------------------------------------------------------------------------------|------------------------------------------------------------------------------------------------------------------------------------------------------------------------------------------------------------|-------------------|------|------|
| Substance<br>Harmonised classification according to Regulation (EC) No 1272/2008 and its Adaptations to Technical Process [Table 3.1 of Annex VI of Regulation (EC) No 1272/2008 as amended] <sup>1</sup> :<br>Peer review proposal <sup>2</sup> for harmonised classification according to Regulation (EC) No 1272/2008: | <table border="1"> <tr> <td data-bbox="766 645 1425 683">Tribenuron-methyl</td> </tr> <tr> <td data-bbox="766 683 1425 795">None</td> </tr> <tr> <td data-bbox="766 795 1425 871">None</td> </tr> </table> | Tribenuron-methyl | None | None |
| Tribenuron-methyl                                                                                                                                                                                                                                                                                                         |                                                                                                                                                                                                            |                   |      |      |
| None                                                                                                                                                                                                                                                                                                                      |                                                                                                                                                                                                            |                   |      |      |
| None                                                                                                                                                                                                                                                                                                                      |                                                                                                                                                                                                            |                   |      |      |

<sup>1</sup> Regulation (EC) No 1272/2008 of the European Parliament and of the Council of 16 December 2008 on classification, labelling and packaging of substances and mixtures, amending and repealing Directives 67/548/EEC and 1999/45/EC, and amending Regulation (EC) No 1907/2006. OJ L 353, 31.12.2008, 1-1355.

<sup>2</sup> It should be noted that harmonised classification and labelling is formally proposed and decided in accordance with Regulation (EC) No 1272/2008. Proposals for classification made in the context of the evaluation procedure under Regulation (EC) No 1107/2009 are not formal proposals.

## Section 2 Impact on Human and Animal Health

### Absorption, distribution, metabolism and excretion (toxicokinetics) (Regulation (EU) N° 283/2013, Annex Part A, point 5.1)

|                                                             |                                                                                                            |
|-------------------------------------------------------------|------------------------------------------------------------------------------------------------------------|
| Rate and extent of oral absorption/systemic bioavailability | Oral absorption is 67 % (based on urinary excretion)                                                       |
| Toxicokinetics                                              | Half-life: 26-33h (low dose groups, based on cumulative excretion)                                         |
| Distribution                                                | Widely distributed. Highest levels were found in blood, kidney and liver                                   |
| Potential for bioaccumulation                               | No evidence for accumulation                                                                               |
| Rate and extent of excretion                                | Rapid and extensive (98.8 % after 96 h), mainly via urine                                                  |
| Metabolism in animals                                       | Extensively metabolised (> 90 %);<br>Main metabolites: saccharin (IN-00581), metsulfuron-methyl (IN-T6376) |
| In vitro metabolism                                         | Data gap                                                                                                   |
| Toxicologically relevant compounds (animals and plants)     | Tribenuron-methyl                                                                                          |
| Toxicologically relevant compounds (environment)            | Tribenuron-methyl                                                                                          |

### Acute toxicity (Regulation (EU) N° 283/2013, Annex Part A, point 5.2)

|                                 |                                              |                          |
|---------------------------------|----------------------------------------------|--------------------------|
| Rat LD <sub>50</sub> oral       | > 5000 mg/kg bw                              |                          |
| Rat LD <sub>50</sub> dermal     | > 5000 mg/kg bw                              |                          |
| Rat LC <sub>50</sub> inhalation | > 6.0 mg/L air /4h ( nose only)              |                          |
| Skin irritation                 | Non-irritant                                 |                          |
| Eye irritation                  | Non-irritant                                 |                          |
| Skin sensitisation              | Sensitising (Buehler; Magnusson and Kligman) | <b>Skin Sens 1, H317</b> |
| Phototoxicity                   | Not phototoxic                               |                          |

### Short-term toxicity (Regulation (EU) N° 283/2013, Annex Part A, point 5.3)

|                                |                                                                                                                                                                                                                                                                                                                                                                                                            |  |
|--------------------------------|------------------------------------------------------------------------------------------------------------------------------------------------------------------------------------------------------------------------------------------------------------------------------------------------------------------------------------------------------------------------------------------------------------|--|
| Target organ / critical effect | <u>Rat</u> : liver (hypertrophy), spleen (increased relative weight), mortality, depression of bodyweight<br><u>Mouse</u> : depression of bodyweight, liver (increased absolute and relative weights), spleen (increased relative weight)<br><u>Dog</u> : thyroid/parathyroid (increased absolute and relative weights), depression of bodyweight, haematotoxicity, kidney (clinical chemistry parameters) |  |
| Relevant oral NOAEL            | 90-day, rat: 7 mg/kg bw per day<br>90-day, mouse: 70 mg/kg bw per day<br>90-day dog: 15 mg/kg bw per day<br>1-year dog: 8 mg/kg bw per day                                                                                                                                                                                                                                                                 |  |
| Relevant dermal NOAEL          | 28-day, rabbit: NOAEL not established, LOAEL                                                                                                                                                                                                                                                                                                                                                               |  |

|                           |                        |  |
|---------------------------|------------------------|--|
| Relevant inhalation NOAEL | 1000 mg/kg bw per day. |  |
|                           | No data - not required |  |

### Genotoxicity (Regulation (EU) N° 283/2013, Annex Part A, point 5.4)

|                            |                                                                                                                                                                                                                                                               |  |
|----------------------------|---------------------------------------------------------------------------------------------------------------------------------------------------------------------------------------------------------------------------------------------------------------|--|
| In vitro studies           | Two Ames-test: negative<br>Chromosome aberration test: negative<br>Mamalian cell gene mutation test: negative<br>Unscheduled DNA synthesis in primary rat hepatocytes (UDS): negative                                                                         |  |
| In vivo studies            | Chromosome aberration study in rat bone marrow cells: negative<br>Mouse bone marrow micronucleus assay: negative<br>Open literature, Rat bone marrow cells: clastogenic/genotoxic potential was observed following repeat dose administration at 100 mg/kg bw |  |
| Photomutagenicity          | No data - not required                                                                                                                                                                                                                                        |  |
| Potential for genotoxicity | Tribenuron-methyl is unlikely to be genotoxic                                                                                                                                                                                                                 |  |

### Long-term toxicity and carcinogenicity (Regulation (EU) N°283/2013, Annex Part A, point 5.5)

|                                                  |                                                                                                                                                                           |  |
|--------------------------------------------------|---------------------------------------------------------------------------------------------------------------------------------------------------------------------------|--|
| Long-term effects (target organ/critical effect) | Rat: reduced body weight gain, organ weight changes, histopathological findings (no specific target organ)<br>Mouse: amyloidosis (testes) and oligospermia (epididymides) |  |
| Relevant long-term NOAEL                         | 2-year, rat: 1 mg/kg bw per day<br>18-month, mouse: 2.5 mg/kg bw per day                                                                                                  |  |
| Carcinogenicity (target organ, tumour type)      | Rat: mammary gland tumours (adenocarcinoma)<br>Mouse: no tumours<br>Tribenuron-methyl is unlikely to be carcinogenic to humans                                            |  |
| Relevant NOAEL for carcinogenicity               | 2-year, rat: 10 mg/kg bw per day;<br>18-month, mouse: > 197 mg/kg bw per day                                                                                              |  |

### Reproductive toxicity (Regulation (EU) N° 283/2013, Annex Part A, point 5.6)

#### Reproduction toxicity

|                                       |                                                                                                                                                                                                                                          |  |
|---------------------------------------|------------------------------------------------------------------------------------------------------------------------------------------------------------------------------------------------------------------------------------------|--|
| Reproduction target / critical effect | Parental toxicity: reduced bodyweight (bw gain)<br>Reproductive toxicity: no adverse effect observed in rat 2-generation study<br>Offspring's toxicity: reduced growth ( pup weight), organ weight changes (testes, spleen, liver, lung) |  |
| Relevant parental NOAEL               | 2 mg/kg bw per day                                                                                                                                                                                                                       |  |
| Relevant reproductive NOAEL           | 75 mg/kg bw per day (highest dose)                                                                                                                                                                                                       |  |
| Relevant offspring NOAEL              | 2 mg/kg bw per day                                                                                                                                                                                                                       |  |

#### Developmental toxicity

|                                        |                                                                     |  |
|----------------------------------------|---------------------------------------------------------------------|--|
| Developmental target / critical effect | <u>Rat:</u><br>Maternal toxicity: reduced body weight (gain), liver |  |
|----------------------------------------|---------------------------------------------------------------------|--|

|                              |                                                                                                                                                                                                                                                                                                    |                                |
|------------------------------|----------------------------------------------------------------------------------------------------------------------------------------------------------------------------------------------------------------------------------------------------------------------------------------------------|--------------------------------|
|                              | (increased relative weight)<br>Developmental toxicity: reduced body weight, increased skeletal alterations<br><u>Rabbit:</u><br>Maternal toxicity: mortality, abortions, bw loss<br>Developmental toxicity: reduced body weight, reduced live foetuses, reduced nidations, increased malformations | <b>STOT-RE</b><br><b>H 373</b> |
| Relevant maternal NOAEL      | Rat: 20 mg/kg bw per day<br>Rabbit: 20 mg/kg bw per day                                                                                                                                                                                                                                            |                                |
| Relevant developmental NOAEL | Rat: 20 mg/kg bw per day<br>Rabbit: 20 mg/kg bw per day                                                                                                                                                                                                                                            |                                |

**Neurotoxicity (Regulation (EU) N° 283/2013, Annex Part A, point 5.7)**

|                                                                              |                                             |  |
|------------------------------------------------------------------------------|---------------------------------------------|--|
| Acute neurotoxicity                                                          | Rat: NOAEL neurotoxicity: 300 mg/kg bw      |  |
| Repeated neurotoxicity                                                       | Rat: NOAEL neurotoxicity: 40.1 mg/kg bw/day |  |
| Additional studies (e.g. delayed neurotoxicity, developmental neurotoxicity) | No data-not required                        |  |

**Other toxicological studies (Regulation (EU) N° 283/2013, Annex Part A, point 5.8)**

|                                                |                                                                                                                                                                                                                                                                                                                                                                                                                                                                                                                                                                                                                                                                                                                                                                                                                                                                                                                                                                                                                                                                                                                                                                                                                                              |
|------------------------------------------------|----------------------------------------------------------------------------------------------------------------------------------------------------------------------------------------------------------------------------------------------------------------------------------------------------------------------------------------------------------------------------------------------------------------------------------------------------------------------------------------------------------------------------------------------------------------------------------------------------------------------------------------------------------------------------------------------------------------------------------------------------------------------------------------------------------------------------------------------------------------------------------------------------------------------------------------------------------------------------------------------------------------------------------------------------------------------------------------------------------------------------------------------------------------------------------------------------------------------------------------------|
| Supplementary studies on the active substance  | <b>28-day immunotoxicity feeding study in rats:</b> Up to 44 mg/kg bw, the highest tested dose, tribenuron-methyl did not show any immunotoxic effect.                                                                                                                                                                                                                                                                                                                                                                                                                                                                                                                                                                                                                                                                                                                                                                                                                                                                                                                                                                                                                                                                                       |
| Endocrine disrupting properties                | <p><b>90-day study on effect on oestrous cycle:</b><br/>At 390 mg/kg bw per day: body weights and body weight gains approximately 26% and 40% lower than control values. Increased mean relative uterine weight, uterine cell proliferation, mean relative ovarian weight, prolonged estrous, and two- to three-fold decrease uterus and mammary oestrogen receptor affinity, and two-fold increase in progesterone receptor number.</p> <p>Seven tribenuron-methyl metabolites can bind to the estrogen receptor (Tribenuron-methyl acid, N-Demethyl triazine amine, <math>\alpha</math>-hydroxi triazine amine, N-Demethyl-6-hydroxymethyl triazine amine, Metsulfuron methyl, Sulfonamide urea, Hydroxylated saccharin.</p> <p><b>Tribenuron-methyl, H295R steroidogenesis assay in rats:</b><br/>Negative for induction and inhibition of testosterone and <math>\beta</math>-estradiol.</p> <p><b>Tribenuron-methyl, estrogen receptor binding assay using rat uterine cytosol:</b> Tribenuron-methyl did not interact with the estrogen receptor</p> <p><b>Tribenuron-methyl, estrogen receptor transcriptional activation, human cell line (HeLa-9903):</b> Tribenuron-methyl is not an agonist of human estrogen receptor alpha.</p> |
| Studies performed on metabolites or impurities | For results from studies of impurities see Annex C                                                                                                                                                                                                                                                                                                                                                                                                                                                                                                                                                                                                                                                                                                                                                                                                                                                                                                                                                                                                                                                                                                                                                                                           |
|                                                | <p><b>IN-00581, saccharin:</b><br/>ADI 3.8 mg/kg bw per day (European Commission, 1997), no ARfD</p>                                                                                                                                                                                                                                                                                                                                                                                                                                                                                                                                                                                                                                                                                                                                                                                                                                                                                                                                                                                                                                                                                                                                         |

|                                                                                                                                                          |                                                                     |
|----------------------------------------------------------------------------------------------------------------------------------------------------------|---------------------------------------------------------------------|
| <b>IN-A4098, triazine amine:</b>                                                                                                                         |                                                                     |
| Acute oral rat study:                                                                                                                                    | LD <sub>50</sub> 1000 mg/kg bw (females)                            |
| 28-day oral rat study:                                                                                                                                   | LOAEL 3.6 mg/kg bw per day                                          |
| Three Ames tests (3):                                                                                                                                    | negative                                                            |
| <i>In vitro</i> clastogenic activity in cultured human peripheral lymphocyte tests (2):                                                                  | negative                                                            |
| <i>In vitro</i> mammalian cell gene mutation tests (hamster cells):                                                                                      | one equivocal, one negative                                         |
| <i>In vitro</i> L5178Y gene mutation assay at the tk locus:                                                                                              | negative                                                            |
| <i>In vivo</i> chromosome studies on somatic cells of Chinese hamster:                                                                                   | negative (no evidence of bone marrow exposure).                     |
| <b>IN-A4098 H295R Steroidogenesis Assay:</b> Negative for induction and inhibition of testosterone and β-estradiol.                                      |                                                                     |
| <b>IN-A4098 Estrogen Receptor Binding Assay Using Rat Uterine Cytosol:</b> IN-A4098 did not interact with the estrogen receptor.                         |                                                                     |
| <b>IN-A4098, estrogen receptor transcriptional activation, human cell line (HeLa-9903):</b> IN-A4098 is not an agonist of human estrogen receptor alpha. |                                                                     |
| <b>IN-B5685, Sulfonamide urea:</b>                                                                                                                       |                                                                     |
| Acute oral rat toxicity study:                                                                                                                           | LD <sub>50</sub> > 11000                                            |
| Limited ten-dose oral subchronic rat study:                                                                                                              | NOAEL ≥ 220                                                         |
| <b>IN-L5296</b>                                                                                                                                          |                                                                     |
| - Acute oral rat toxicity study:                                                                                                                         | LD <sub>50</sub> 394 mg/kg bw (triggers H302, Harmful if swallowed) |
| - Acute percutaneous rat toxicity study:                                                                                                                 | LD <sub>50</sub> ≥ 2000 mg/kg bw                                    |
| - Acute dermal irritation test:                                                                                                                          | Negative                                                            |
| - Sensitisation test (Magnusson – Kligman):                                                                                                              | Negative                                                            |
| - <i>In vivo</i> mouse micronucleus test:                                                                                                                | Negative (no evidence of bone marrow exposure)                      |
| - <i>In vitro</i> assessment of clastogenic activity in cultured human lymphocytes:                                                                      | Negative                                                            |
| - Ames test:                                                                                                                                             | Negative                                                            |
| - Four-week oral, rat toxicity test:                                                                                                                     | NOAEL 8 mg/kg bw per day                                            |
| <b>IN-R9805</b>                                                                                                                                          |                                                                     |
| - Ames tests (2):                                                                                                                                        | negative                                                            |
| - <i>In vitro</i> mammalian chromosome aberration tests in human peripheral blood lymphocytes (2):                                                       | negative                                                            |
| - <i>In vitro</i> mammalian cell gene mutation tests (CHO or V79/HPRT):                                                                                  | negative                                                            |

### Medical data (Regulation (EU) N° 283/2013, Annex Part A, point 5.9)

No cases of adverse health effects observed in workers, no cases of poisoning reported. There is no specific antidote or therapeutic regimes. Treat symptomatically.

### Summary (Regulation (EU) N°1107/2009, Annex II, point 3.1 and 3.6)

|                                                        | Value (mg/kg bw (per day)) | Study                            | Uncertainty factor |
|--------------------------------------------------------|----------------------------|----------------------------------|--------------------|
| Acceptable Daily Intake (ADI)                          | 0.01                       | rat, 2-year                      | 100                |
| Acute Reference Dose (ARfD)                            | 0.2                        | rabbit, developmental            | 100                |
| Acceptable Operator Exposure Level (AOEL) <sup>1</sup> | 0.05                       | Rat, combined 90-day rat studies | 100 + 67%*         |
| Acute Acceptable Operator Exposure Level (AAOEL)       | 0.13                       | rabbit, developmental            | 100 + 67%*         |

\*Correction factor of 67% for oral absorption

<sup>1</sup> AOEL of 0.07 mg/kg bw per day was established during first peer review (European Commission, 2005)

**Dermal absorption (Regulation (EU) N° 284/2013, Annex Part A, point 7.3)**

Representative formulation (indicate name, type e.g. EC and concentration of active substance)

|                                                                                                                |
|----------------------------------------------------------------------------------------------------------------|
| <u>Tribenuron methyl 50 SG</u><br>Concentrate: 25% (default value)<br>Spray dilution: 75% (default value)      |
| <u>Tribenuron-methyl 750 g/kg WG</u><br>Concentrate: 25% (default value)<br>Spray dilution 75% (default value) |

**Exposure scenarios (Regulation (EU) N° 284/2013, Annex Part A, point 7.2)**

Operators

|                                                                                                                                                                                                                                     |
|-------------------------------------------------------------------------------------------------------------------------------------------------------------------------------------------------------------------------------------|
| <b>Tribenuron methyl 50 SG (DPX-L5300)</b><br>Use: sunflowers, tractor mounted equipment, application rate 0.03 kg as/ha, 0.06 kg product/ha<br>Exposure estimates (model): % of AOEL                                               |
| <u>UK POEM</u>                                                                                                                                                                                                                      |
| Without PPE: 386                                                                                                                                                                                                                    |
| PPE (gloves during mix/loading and application): 51                                                                                                                                                                                 |
| <u>German model (geometric mean values)</u>                                                                                                                                                                                         |
| Without PPE: 35                                                                                                                                                                                                                     |
| PPE (gloves during mix/loading and application): 22                                                                                                                                                                                 |
| <u>German model (75 percentile):</u>                                                                                                                                                                                                |
| Without PPE: 127                                                                                                                                                                                                                    |
| PPE (gloves during mix/loading and application): 87                                                                                                                                                                                 |
| PPE (gloves during mix/loading and application, sturdy footwear and coverall): 14                                                                                                                                                   |
| <u>EFSA model</u>                                                                                                                                                                                                                   |
| Without PPE: 39                                                                                                                                                                                                                     |
| PPE (gloves, work wear - arms, body and legs covered): 18                                                                                                                                                                           |
| <b>Tribenuron-methyl 750 g/kg WG (CHA 6310)</b><br>Use: cereals, tractor mounted equipment, application rate 0.03 kg as/ha, 0.04 kg product/ha<br>Exposure estimates (model): % of AOEL                                             |
| <u>UK POEM</u>                                                                                                                                                                                                                      |
| Without PPE: 386                                                                                                                                                                                                                    |
| PPE (gloves during mix/loading and application): 51                                                                                                                                                                                 |
| <u>German model (geometric mean values)</u>                                                                                                                                                                                         |
| Without PPE: 35                                                                                                                                                                                                                     |
| PPE (gloves during mix/loading and application): 22                                                                                                                                                                                 |
| <u>German model (75 percentile):</u>                                                                                                                                                                                                |
| Without PPE: 127                                                                                                                                                                                                                    |
| PPE (gloves during mix/loading and application): 87                                                                                                                                                                                 |
| PPE (gloves during mix/loading and application, sturdy footwear and coverall): 14                                                                                                                                                   |
| <u>EFSA model</u>                                                                                                                                                                                                                   |
| Without PPE: 39                                                                                                                                                                                                                     |
| PPE (gloves, work wear - arms, body and legs covered): 18                                                                                                                                                                           |
| Hoernicke <i>et al.</i> (1998) and Krebs <i>et al.</i> (2001): 11% of AOEL                                                                                                                                                          |
| Approach following guidance of the German model from Martin S <i>et al.</i> (2008)<br>Bystanders: 0.23% and 0.17% of AOEL for adult and child, respectively<br>Residents: 0.02% and 0.02% of AOEL for adult and child, respectively |

Workers

Bystanders and residents

**Classification with regard to toxicological data (Regulation (EU) N° 283/2013, Annex Part A, Section 10)**

Substance :

Tribenuron Methyl



Harmonised classification according to Regulation (EC) No 1272/2008 and its Adaptations to Technical Process [Table 3.1 of Annex VI of Regulation (EC) No 1272/2008 as amended]<sup>3</sup> :

Peer review proposal <sup>4</sup> for harmonised classification according to Regulation (EC) No 1272/2008:

|                                                                                                                                                  |
|--------------------------------------------------------------------------------------------------------------------------------------------------|
| Skin Sens 1, H 317                                                                                                                               |
| Skin Sens.1 H317 “May cause an allergic skin reaction”<br>STOT RE Cat 2 H373 “May cause damage to organs through prolonged or repeated exposure” |

---

<sup>3</sup> Regulation (EC) No 1272/2008 of the European Parliament and of the Council of 16 December 2008 on classification, labelling and packaging of substances and mixtures, amending and repealing Directives 67/548/EEC and 1999/45/EC, and amending Regulation (EC) No 1907/2006. OJ L 353, 31.12.2008, 1-1355.

<sup>4</sup> It should be noted that harmonised classification and labelling is formally proposed and decided in accordance with Regulation (EC) No 1272/2008.

## Section 3 Residues in or on treated products food and feed

## Metabolism in plants (Regulation (EU) N° 283/2013, Annex Part A, points 6.2.1, 6.5.1, 6.6.1 and 6.7.1)

| Primary crops<br>(Plant groups covered)<br>OECD Guideline 501                                                                                                                                                                                                                                                                                                                                                                                                                                                                                                                                                                    | Crop groups                                                                                                                                        | Crop(s)                                                                                                                                            | Application(s)                                      | DAT (days)                                                                                                                                                                                                           |
|----------------------------------------------------------------------------------------------------------------------------------------------------------------------------------------------------------------------------------------------------------------------------------------------------------------------------------------------------------------------------------------------------------------------------------------------------------------------------------------------------------------------------------------------------------------------------------------------------------------------------------|----------------------------------------------------------------------------------------------------------------------------------------------------|----------------------------------------------------------------------------------------------------------------------------------------------------|-----------------------------------------------------|----------------------------------------------------------------------------------------------------------------------------------------------------------------------------------------------------------------------|
|                                                                                                                                                                                                                                                                                                                                                                                                                                                                                                                                                                                                                                  | Fruit crops                                                                                                                                        | Olives                                                                                                                                             | Ground application, 1x 40 g a.s./ha                 | 0, 14, 28, 42                                                                                                                                                                                                        |
|                                                                                                                                                                                                                                                                                                                                                                                                                                                                                                                                                                                                                                  | Cereals/<br>grass crops                                                                                                                            | Winter<br>Wheat                                                                                                                                    | Foliar; 1 x 72-75 g a.s./ha                         | 0, 4, 8, 14, 28,<br>63                                                                                                                                                                                               |
|                                                                                                                                                                                                                                                                                                                                                                                                                                                                                                                                                                                                                                  |                                                                                                                                                    | Spring<br>Wheat                                                                                                                                    | Foliar, 1x24-28 g a.s./ha                           | 0, 3, 7, 21, 51                                                                                                                                                                                                      |
|                                                                                                                                                                                                                                                                                                                                                                                                                                                                                                                                                                                                                                  |                                                                                                                                                    |                                                                                                                                                    | Foliar, 1 x 30 g a.s./ha                            | 7, 29, 98                                                                                                                                                                                                            |
|                                                                                                                                                                                                                                                                                                                                                                                                                                                                                                                                                                                                                                  | Pulses/<br>Oilseeds                                                                                                                                | Canola                                                                                                                                             | Foliar, 1 x 25 g a.s./ha                            | 0, 2, 35, 78                                                                                                                                                                                                         |
|                                                                                                                                                                                                                                                                                                                                                                                                                                                                                                                                                                                                                                  |                                                                                                                                                    | Soyabean                                                                                                                                           | Foliar, 1-2 x 53 & 106 g a.s./ha<br>BBCH GS (60-63) | 0- 82 DALA<br>1st application<br>&<br>7 DALA 2nd<br>application                                                                                                                                                      |
| Cotton                                                                                                                                                                                                                                                                                                                                                                                                                                                                                                                                                                                                                           |                                                                                                                                                    | Foliar, 1 x 22 g a.s./ha                                                                                                                           | 89, 119, 174                                        |                                                                                                                                                                                                                      |
| Miscellaneous                                                                                                                                                                                                                                                                                                                                                                                                                                                                                                                                                                                                                    | --                                                                                                                                                 | --                                                                                                                                                 | --                                                  |                                                                                                                                                                                                                      |
| <p>Applied radiolabelled [<sup>14</sup>C tribenuron-methyl] phenyl and triazine.<br/>Tribenuron-methyl was extensively metabolised in wheat and canola, soyabean to numerous triazine amine and sulphonamide moiety metabolites: IN-R9805, IN-37739, IN-L5296, IN-A4098, IN-D5803, IN-G7462, IN-B5685 IN-D5119. In cotton and olives (foliar application within the tree rows) the total TRRs was very low (0.01 to 0.03 mg/kg). The metabolism study in olives covers only the specific GAP in olives and cannot be extrapolated to all fruit crop groups therefore, the residue definitions cover only cereals and pulses.</p> |                                                                                                                                                    |                                                                                                                                                    |                                                     |                                                                                                                                                                                                                      |
| Rotational crops<br>(metabolic pattern)<br>OECD Guideline 502                                                                                                                                                                                                                                                                                                                                                                                                                                                                                                                                                                    | Crop groups                                                                                                                                        | Crop(s)                                                                                                                                            | PBI (days)                                          | Comments                                                                                                                                                                                                             |
|                                                                                                                                                                                                                                                                                                                                                                                                                                                                                                                                                                                                                                  | Root/tuber crops                                                                                                                                   | Radish                                                                                                                                             | 30, 120, 366                                        | Max application rate of 35g a.s./ha on bare soil (1.2N, cf GAP on cereals, sunflower). Studies were conducted with both applied radiolabelled [ <sup>14</sup> C tribenuron-methyl] phenyl and triazine respectively. |
|                                                                                                                                                                                                                                                                                                                                                                                                                                                                                                                                                                                                                                  |                                                                                                                                                    | Red beets                                                                                                                                          | 30, 120                                             |                                                                                                                                                                                                                      |
|                                                                                                                                                                                                                                                                                                                                                                                                                                                                                                                                                                                                                                  | Leafy crops                                                                                                                                        | Lettuce                                                                                                                                            | 30, 120, 366                                        |                                                                                                                                                                                                                      |
|                                                                                                                                                                                                                                                                                                                                                                                                                                                                                                                                                                                                                                  |                                                                                                                                                    | Cabbage                                                                                                                                            | 30, 120                                             |                                                                                                                                                                                                                      |
|                                                                                                                                                                                                                                                                                                                                                                                                                                                                                                                                                                                                                                  | Cereal (small grain)                                                                                                                               | Barley                                                                                                                                             | 30, 120, 366                                        |                                                                                                                                                                                                                      |
|                                                                                                                                                                                                                                                                                                                                                                                                                                                                                                                                                                                                                                  |                                                                                                                                                    | Wheat                                                                                                                                              | 30, 120                                             |                                                                                                                                                                                                                      |
| Sorghum                                                                                                                                                                                                                                                                                                                                                                                                                                                                                                                                                                                                                          |                                                                                                                                                    | 30, 120                                                                                                                                            |                                                     |                                                                                                                                                                                                                      |
| Pulses/oilseeds                                                                                                                                                                                                                                                                                                                                                                                                                                                                                                                                                                                                                  | Soybean                                                                                                                                            | 30, 120                                                                                                                                            |                                                     |                                                                                                                                                                                                                      |
| Rotational crop and primary crop metabolism similar?                                                                                                                                                                                                                                                                                                                                                                                                                                                                                                                                                                             | Tribenuron-methyl was not detected. The same metabolic pathway as for primary crops was identified; the main metabolite was IN-A4098 (0.019 mg/kg) |                                                                                                                                                    |                                                     |                                                                                                                                                                                                                      |
| Processed commodities<br>(standard hydrolysis study)<br>OECD Guideline 507<br>Residue pattern in processed commodities similar to residue pattern in raw commodities?                                                                                                                                                                                                                                                                                                                                                                                                                                                            | Conditions                                                                                                                                         |                                                                                                                                                    |                                                     |                                                                                                                                                                                                                      |
|                                                                                                                                                                                                                                                                                                                                                                                                                                                                                                                                                                                                                                  | 20 min, 90°C, pH 4                                                                                                                                 |                                                                                                                                                    |                                                     |                                                                                                                                                                                                                      |
|                                                                                                                                                                                                                                                                                                                                                                                                                                                                                                                                                                                                                                  | 60 min, 100°C, pH 5                                                                                                                                |                                                                                                                                                    |                                                     |                                                                                                                                                                                                                      |
|                                                                                                                                                                                                                                                                                                                                                                                                                                                                                                                                                                                                                                  | 20 min, 120°C, pH 6                                                                                                                                |                                                                                                                                                    |                                                     |                                                                                                                                                                                                                      |
|                                                                                                                                                                                                                                                                                                                                                                                                                                                                                                                                                                                                                                  |                                                                                                                                                    | Residues <LOQ—in cereal grains, olives. Processing studies may be required, pending the confirmatory data on the residue levels on sunflower seed. |                                                     |                                                                                                                                                                                                                      |
| Plant residue definition for monitoring (RD-Mo)<br>OECD Guidance, series on pesticides No 31                                                                                                                                                                                                                                                                                                                                                                                                                                                                                                                                     | Tribenuron-methyl                                                                                                                                  |                                                                                                                                                    |                                                     |                                                                                                                                                                                                                      |

|                                                      |                                                                                                                                                                                                                                                                                       |
|------------------------------------------------------|---------------------------------------------------------------------------------------------------------------------------------------------------------------------------------------------------------------------------------------------------------------------------------------|
| Plant residue definition for risk assessment (RD-RA) | 1) Tribenuron-methyl<br>2) (provisional) : tribenuron methyl , sulphonamide's (IN-D5803, IN-G7462, IN-B5685) and triazineamine's (IN-L5296, IN-37739, IN-R9805, IN-A4098) (the way the residue definition will be expressed is pending the outcome of their toxicological evaluation) |
| Conversion factor (monitoring to risk assessment)    | Open                                                                                                                                                                                                                                                                                  |

**Metabolism in livestock (Regulation (EU) N° 283/2013, Annex Part A, points 6.2.2, 6.2.3, 6.2.4, 6.2.5 6.7.1)**

| OECD Guideline 503 and SANCO/11187/2013 rev. 3 (fish)<br><b>Animals covered</b>                                                                                                                                                                                                                                                                                                                                               | Animal                                                                                                                                                                                                             | Dose (mg/kg bw/d)                                                             | Duration (days) | N rate/comment |
|-------------------------------------------------------------------------------------------------------------------------------------------------------------------------------------------------------------------------------------------------------------------------------------------------------------------------------------------------------------------------------------------------------------------------------|--------------------------------------------------------------------------------------------------------------------------------------------------------------------------------------------------------------------|-------------------------------------------------------------------------------|-----------------|----------------|
|                                                                                                                                                                                                                                                                                                                                                                                                                               | Laying hen                                                                                                                                                                                                         | 0.814 and 0.846<br>(triazine and phenyl <sup>14</sup> C labels, respectively) | 14              | 160-166 X      |
|                                                                                                                                                                                                                                                                                                                                                                                                                               | Goat/Cow                                                                                                                                                                                                           | 0.691 and 0.742<br>(triazine and phenyl <sup>14</sup> C labels, respectively) | 7               | 110-118 X      |
|                                                                                                                                                                                                                                                                                                                                                                                                                               | Pig                                                                                                                                                                                                                |                                                                               |                 |                |
|                                                                                                                                                                                                                                                                                                                                                                                                                               | Fish                                                                                                                                                                                                               |                                                                               |                 |                |
| The major metabolic pathways of tribenuron-methyl in lactating goats and laying hens by hydroxylation on the triazine ring methyl position, O-demethylation and N-demethylation, sulfonyleurea bridge hydrolysis, hydroxylation on the triazine ring bridge N-methyl moiety, and carboxyl methyl ester hydrolysis. The further oxidation of methyl moiety on the triazine ring to the carboxylic acid only occurred in goats. |                                                                                                                                                                                                                    |                                                                               |                 |                |
| Time needed to reach a plateau concentration in milk and eggs (days)                                                                                                                                                                                                                                                                                                                                                          | Milk: 5 days<br>Eggs: 12 days                                                                                                                                                                                      |                                                                               |                 |                |
| Animal residue definition for monitoring (RD-Mo)                                                                                                                                                                                                                                                                                                                                                                              | Tribenuron-methyl                                                                                                                                                                                                  |                                                                               |                 |                |
| OECD Guidance, series on pesticides No 31<br>Animal residue definition for risk assessment (RD-RA)                                                                                                                                                                                                                                                                                                                            | 1) <u>Ruminants</u> : tribenuron-methyl and IN A4098<br>2) <u>Poultry</u> : tribenuron-methyl, IN-L5296, IN-A4098 and IN-D5803.<br>The way the residue definitions will be expressed is pending the outcome of the |                                                                               |                 |                |
| Conversion factor (monitoring to risk assessment)                                                                                                                                                                                                                                                                                                                                                                             | Open                                                                                                                                                                                                               |                                                                               |                 |                |
| Metabolism in rat and ruminant similar (Yes/No)                                                                                                                                                                                                                                                                                                                                                                               | Yes                                                                                                                                                                                                                |                                                                               |                 |                |
| Fat soluble residues (Yes/No) (FAO, 2009)                                                                                                                                                                                                                                                                                                                                                                                     | No                                                                                                                                                                                                                 |                                                                               |                 |                |

**Residues in succeeding crops (Regulation (EU) N° 283/2013, Annex Part A, point 6.6.2)**

|                                                                                      |                                                                                                                                                                                                                                                                                                                                                                                                                                                                                                         |
|--------------------------------------------------------------------------------------|---------------------------------------------------------------------------------------------------------------------------------------------------------------------------------------------------------------------------------------------------------------------------------------------------------------------------------------------------------------------------------------------------------------------------------------------------------------------------------------------------------|
| <b>Confined rotational crop study</b><br>(Quantitative aspect)<br>OECD Guideline 502 | No tribenuron-methyl was detected, and residues of its degradation products were negligible in any of the crop parts relevant for human consumption. It should be noted however that the relevant metabolite IN-A4908 found in beet foliage (up to 0.019 mg/kg, 30 PBI). The genotoxic potential of IN-A4908 cannot be ruled out. Identified metabolites show a similar metabolic pathway compared with primary metabolism and rotational studies and no specific residue definition has to be derived. |
| <b>Field rotational crop study</b><br>OECD Guideline 504                             | Tribenuron-methyl 50SG (L5300 305) was applied to bare soil at a rate of 30 g tribenuron-methyl/ha at 2 test sites. Since for one study only limited investigation was conducted, (tribenuron-methyl, IN-L5296, IN-R9805, IN-D5803 or IN-B5528), while IN-A4908 found in the metabolism study up to (0.019mg/kg, 30 PBI) was not analysed for, the field rotational crop studies are considered insufficient (data gap)                                                                                 |

**Stability of residues (Regulation (EU) N° 283/2013, Annex Part A, point 6.1)**

OECD Guideline 506

| Plant products<br>(Category)                                             | Commodity         | T<br>(°C) | Stability (Month/Year) |  |  |  |
|--------------------------------------------------------------------------|-------------------|-----------|------------------------|--|--|--|
|                                                                          |                   |           |                        |  |  |  |
| High water content                                                       | Wheat forage      | ~ - 18°C  | 24 months              |  |  |  |
| High oil content                                                         | Cotton seed       | ~ - 20°C  | 14 months              |  |  |  |
|                                                                          | Sunflower seed    | ~ - 20°C  | 12 months              |  |  |  |
| High protein content                                                     | Dried bean        | ~ - 20°C  | 18 months              |  |  |  |
| High starch content                                                      | Wheat grain       | ~ - 20°C  | 37 months              |  |  |  |
| High acid content                                                        | Orange            | ~ - 20°C  | 18 months              |  |  |  |
| Others                                                                   | Cotton gin trash, | ~ - 20°C  | 18 months              |  |  |  |
|                                                                          | Wheat hay         | ~ - 20°C  | 18 months              |  |  |  |
|                                                                          | Wheat straw       | ~ - 20°C  | 37 months              |  |  |  |
| Animal                                                                   | Animal commodity  | T<br>(°C) | Stability (Month/Year) |  |  |  |
|                                                                          |                   |           |                        |  |  |  |
| No feeding study.                                                        | Muscle            | --        |                        |  |  |  |
| No feeding study.                                                        | Liver             | --        |                        |  |  |  |
| No feeding study.                                                        | Kidney            | --        |                        |  |  |  |
| No feeding study.                                                        | Milk              | --        |                        |  |  |  |
| No feeding study.                                                        | Milk              | --        |                        |  |  |  |
| No feeding study.                                                        | Egg               | --        |                        |  |  |  |
| For the time being the livestock residue assessment cannot be finalised. |                   |           |                        |  |  |  |

**Summary of residues data from the supervised residue trials (Regulation (EU) N° 283/2013, Annex Part A, point 6.3) OECD Guideline 509, OECD Guidance, series on pesticides No 66 and OECD MRL calculator**

| Crop                       | Region/<br>Outdoor<br>(a) | Residue levels (mg/kg) observed in the supervised<br>residue trials relevant to the supported GAPs<br>(b)                                                                                                                                                                             | Recommendations/comments<br>(OECD calculations)                                                                                                                                                                                                                                                                                                                                                                                                                                                                                                                      | MRL<br>proposals<br>(mg/kg) | HR<br>(mg/kg)<br>(c)                                          | STMR<br>(mg/kg)<br>(d) |
|----------------------------|---------------------------|---------------------------------------------------------------------------------------------------------------------------------------------------------------------------------------------------------------------------------------------------------------------------------------|----------------------------------------------------------------------------------------------------------------------------------------------------------------------------------------------------------------------------------------------------------------------------------------------------------------------------------------------------------------------------------------------------------------------------------------------------------------------------------------------------------------------------------------------------------------------|-----------------------------|---------------------------------------------------------------|------------------------|
| <b>Representative uses</b> |                           |                                                                                                                                                                                                                                                                                       |                                                                                                                                                                                                                                                                                                                                                                                                                                                                                                                                                                      |                             |                                                               |                        |
| Cereals (grains)           | NEU+SEU                   | <p>1 application at BBCH 30-39 (spring or winter cereals without underlay), max 24 g a.s./ha, PHI not applicable</p> <p>Residues of tribenuron-methyl: 77x &lt;0.01 (nd)<br/>Residues including metabolites, expressed as tribenuron-methyl equivalents: 52x&lt;0.01 mg/kg, 0.004</p> | <p>The results were similar for winter and spring variants and for barley and wheat. The trials are therefore considered together irrespective of the crop variant.</p> <p>DUP submitted 77 trials that were in accordance with their proposed critical GAP (&lt;±25%). 40 trials were in NEU and 37 in SEU. Surfactant was included in 50 trials. In 53 trials, metabolites were also analysed for.</p> <p>The results were similar irrespective of study and inclusion or not of surfactant (eg. little or no tribenuron-methyl residues found in the grains).</p> | 0.01*                       | 0.01*                                                         | 0.01*                  |
| Cereals (grains)           | NEU+SEU                   | <p>1 application at BBCH 12-39 (spring or winter cereals), max 30 g a.s./ha, PHI not applicable</p> <p>Residues of tribenuron-methyl: 16x&lt;0.01 (nd), 4x&lt;0.02 (nd)</p>                                                                                                           | <p>The results were similar for winter and spring variants and for barley and wheat. The trials are therefore considered together irrespective of the crop variant.</p> <p>TTF submitted 20 trials that are within their cGAP (&lt;±25%) for TTF. 12 trials were in NEU and 8 in SEU.</p> <p>The results were similar irrespective of study and inclusion or not of surfactant (eg. little or no tribenuron-methyl residues found in the grains).</p>                                                                                                                | 0.01*                       | 0.02*<br>(Reflects a higher LOQ in a minority of the studies) | 0.01*                  |
| Sunflower (seed)           | NEU+SEU                   | <p>1 application at BBCH 12-18, max 30 g as/ha, PHI 30 days<br/>None of the trials support a GAP with PHI 30 days</p>                                                                                                                                                                 | <p>26 trials were performed on sunflower (DUP). 11 of the trials were performed in NEU and 15 of them in SEU. All trials included surfactant. With application at BBCH 18 and harvest at maturity (PHI 66-112 days), residues including metabolites, expressed as tribenuron-methyl equivalents:<br/>NEU: 11x &lt;0.01 (nd)</p>                                                                                                                                                                                                                                      | -                           | -                                                             | -                      |

| Crop             | Region/<br>Outdoor<br>(a) | Residue levels (mg/kg) observed in the supervised<br>residue trials relevant to the supported GAPs<br>(b)                                                                                                                                                                                                                                                                                                                                                                                                          | Recommendations/comments<br>(OECD calculations)                                                                                                                                                                                                                                         | MRL<br>proposals<br>(mg/kg) | HR<br>(mg/kg)<br>(c) | STMR<br>(mg/kg)<br>(d) |
|------------------|---------------------------|--------------------------------------------------------------------------------------------------------------------------------------------------------------------------------------------------------------------------------------------------------------------------------------------------------------------------------------------------------------------------------------------------------------------------------------------------------------------------------------------------------------------|-----------------------------------------------------------------------------------------------------------------------------------------------------------------------------------------------------------------------------------------------------------------------------------------|-----------------------------|----------------------|------------------------|
|                  |                           |                                                                                                                                                                                                                                                                                                                                                                                                                                                                                                                    | SEU: 15x<0.01 (nd)                                                                                                                                                                                                                                                                      |                             |                      |                        |
| Olives           | SEU                       | 1 application in early spring, max 20 g as/ha, PHI 28 days<br>Residues of tribenuron-methyl: 84 x <0.01 (nd)<br>Residues including metabolites, expressed as tribenuron-methyl<br>equivalents: 84 x <0.01 (nd)                                                                                                                                                                                                                                                                                                     | 8 trials were performed on olives (DUP) in<br>SEU.                                                                                                                                                                                                                                      | 0.01*                       | 0.01*                | 0.01*                  |
| Cereals (straw)  | NEU+SEU                   | 1 application at BBCH 12-39 (spring or winter cereals), max 30<br>g a.s./ha, PHI not applicable<br>Residues of tribenuron-methyl: 16x<0.02 (nd), 4x<0.05 (nd)                                                                                                                                                                                                                                                                                                                                                      | TTF submitted 20 trials that are within their<br>cGAP (<±25%) for TTF. 12 trials were in<br>NEU and 8 in SEU.<br>Straw were harvested and analysed at BBCH<br>89 in these trials (at the same time as mature<br>grains)                                                                 | NR                          | NR                   | NR                     |
| Cereals (straw)  | NEU+SEU                   | 1 application at BBCH 30-39 (spring or winter cereals without<br>underlay), max 24 g a.s./ha, PHI not applicable<br><br>Residues of tribenuron-methyl: 53 x <0.01 (nd), 24 x <0.05 (nd)<br>Residues including metabolites, expressed as tribenuron-methyl<br>equivalents: 6x<0.01, 0.0068, 3x0.008, 3x0.01, 4x0.012,<br>2x0.014, 0.016, 2x0.018, 0.019, 0.02, 2x0.026, 0.027, 3x0.029,<br>0.032, 0.038, 0.039, 2x0.043, 0.046, 0.048, 0.049, 0.055, 0.065,<br>0.069, 2x0.10, 4x0.12, 0.13, 0.188, 0.20, 0.23, 0.26 | DUP submitted 77 trials that were in<br>accordance with their proposed critical GAP<br>(<±25%). 40 trials were in NEU and 37 in<br>SEU. Surfactant was included in 50 trials.<br>Straw were harvested and analysed at BBCH<br>89 in these trials (at the same time as mature<br>grains) | NR                          | NR                   | NR                     |
| Cereals (hay)    | NEU+SEU                   | 1 application at BBCH 30-39 (spring or winter cereals without<br>underlay), max 24 g as/ha, PHI 28 days for harvest as<br>forage/silage before maturity<br>Residues of tribenuron-methyl:<br>28 x <0.01 (nd)<br>Residues including metabolites, expressed as tribenuron-methyl<br>equivalents: 2x<0.01, 0.011, 0.026, 0.028, 0.038, 2x0.042,<br>0.043, 0.048, 0.052, 0.058, 0.062, 0.065, 0.066, 0.067, 0.068,<br>0.10, 0.12, 0.13, 2x0.18, 0.19, 0.22, 0.24, 0.27, 0.35, 0.38                                     | DUP submitted 28 trials that investigated<br>residues in hay at the proposed PHI of 28 days.<br>16 trials were in NEU and 12 in SEU. All<br>these trials included surfactant.                                                                                                           | NR                          | NR                   | NR                     |
| Cereals (forage) | NEU+SEU                   | 1 application at BBCH 30-39 (spring or winter cereals without<br>underlay), max 24 g as/ha, PHI 28 days for harvest as<br>forage/silage before maturity<br>Residues of tribenuron-methyl:<br>28x <0.01 (nd), 12x <0.05 (nd)<br>Residues including metabolites, expressed as tribenuron-methyl<br>equivalents:<br>3x<0.01, 2x0.014, 0.015, 0.016, 3x0.020, 0.024, 0.025, 0.028,<br>0.029, 0.033, 0.037, 0.038, 0.039, 0.04, 0.045, 0.058, 0.064,<br>0.067, 0.074, 0.11, 0.12, 0.16, 0.18                            | DUP submitted 40 trials that investigated<br>residues in forage at the proposed PHI of 28<br>days. 18-of these were in SEU and 22 in NEU.<br>In 28 of the trials, metabolites were also<br>analysed, 16 in NEU and 12 in SEU.<br>Surfactant was included in 37 of the trials.           | NR                          | NR                   | NR                     |
| Grass underlay   | NEU+SEU                   | 1 application at BBCH 12-13 (spring or winter cereals without                                                                                                                                                                                                                                                                                                                                                                                                                                                      | DUP submitted 13 trials on grass underlay, of                                                                                                                                                                                                                                           | NR                          | NR                   | NR                     |

| Crop                                                                                                                    | Region/<br>Outdoor<br>(a) | Residue levels (mg/kg) observed in the supervised<br>residue trials relevant to the supported GAPs<br>(b)                                                                                                                                                                                                                                                                                                                 | Recommendations/comments<br>(OECD calculations)                                                                                                                                                                                                                                                                                                               | MRL<br>proposals<br>(mg/kg) | HR<br>(mg/kg)<br>(c) | STMR<br>(mg/kg)<br>(d) |
|-------------------------------------------------------------------------------------------------------------------------|---------------------------|---------------------------------------------------------------------------------------------------------------------------------------------------------------------------------------------------------------------------------------------------------------------------------------------------------------------------------------------------------------------------------------------------------------------------|---------------------------------------------------------------------------------------------------------------------------------------------------------------------------------------------------------------------------------------------------------------------------------------------------------------------------------------------------------------|-----------------------------|----------------------|------------------------|
|                                                                                                                         |                           | underlay), max 7.5 g as/ha, PHI 28 days<br>Residues of tribenuron-methyl:<br>Forage: 7x <0.01 (nd)<br>Hay: 7x <0.01 (nd)<br>Residues including metabolites, expressed as tribenuron-methyl<br>equivalents:<br>Forage: 7 <0.01 (nd)<br>Hay: 1 <0.01 (nd), 2x0.011, 0.025, 0.038, 2x0.12                                                                                                                                    | which 7 complied with the PHI of 28 days in<br>the proposed GAP. The residues of tribenuron-<br>methyl and tribenuron equivalent residues<br>were measured at several PHI, but the values<br>from PHI 21 were used in the assessment. 5<br>trials were in NEU and 42 trials in SEU.                                                                           |                             |                      |                        |
| Clover underlay                                                                                                         | NEU+SEU                   | 1 application at BBCH 11 (spring or winter cereals without<br>underlay), max 5.5 g as/ha, PHI 28 days<br>Residues of tribenuron-methyl:<br>Forage: 3x<0.01 (nd), 0.005, 0.008, 0.022<br>Hay: <0.01 (nd), 0.008, 0.014, 0.028, 0.04, 0.14<br>Residues including metabolites, expressed as tribenuron-methyl<br>equivalents:<br>Forage: 0.008, 0.02, 0.022, 0.026, 0.045, 0.11<br>Hay: 0.023, 0.089, 0.10, 0.17, 0.20, 0.46 | DUP submitted 12 trials on red clover<br>underlay, of which 6 complied with the PHI of<br>28 days in the proposed GAP. The residues of<br>tribenuron-methyl and tribenuron equivalent<br>residues were measured at several PHI, but<br>the values from PHI 21 were used in the<br>assessment. 4 of the accepted trials were from<br>NEU and 42 trials in SEU. | NR                          | NR                   | NR                     |
| Pasture (grass)                                                                                                         | NEU+SEU                   | 1 application at BBCH 59 (spring or winter cereals without<br>underlay), max 7.5 g as/ha, PHI 28 days<br>Residues of tribenuron-methyl:<br>Forage: 9 x <0.01 (nd)<br>Hay: 8 x <0.01 (nd), 0.025<br>Residues including metabolites, expressed as tribenuron-methyl<br>equivalents:<br>Forage: 0.0068, 5 x <0.010 (nd), 0.011, 0.015, 0.040<br>Hay: 0.0060, <0.010 (nd), 0.028, 0.029, 0.033, 0.056, 0.084,<br>0.12, 0.15   | 17 trials were performed on pasture grass<br>(DUP). Of these 9 trials were analysed at the<br>proposed PHI of 28 days. 5 trials were in NEU<br>and 4 trials were in SEU.                                                                                                                                                                                      | NR                          | NR                   | NR                     |
| <b>Summary of the data on formulation equivalence OECD Guideline 509</b>                                                |                           |                                                                                                                                                                                                                                                                                                                                                                                                                           |                                                                                                                                                                                                                                                                                                                                                               |                             |                      |                        |
| <b>Crop</b>                                                                                                             | <b>Region</b>             | <b>Residue data (mg/kg)</b>                                                                                                                                                                                                                                                                                                                                                                                               | <b>Recommendations/comments</b>                                                                                                                                                                                                                                                                                                                               |                             |                      |                        |
|                                                                                                                         |                           |                                                                                                                                                                                                                                                                                                                                                                                                                           |                                                                                                                                                                                                                                                                                                                                                               |                             |                      |                        |
| <b>Summary of data on residues in pollen and bee products (Regulation (EU) No 283/2013, Annex Part A, point 6.10.1)</b> |                           |                                                                                                                                                                                                                                                                                                                                                                                                                           |                                                                                                                                                                                                                                                                                                                                                               |                             |                      |                        |
| <b>Product(s)</b>                                                                                                       | <b>Region</b>             | <b>Residue data (mg/kg)</b>                                                                                                                                                                                                                                                                                                                                                                                               | <b>Recommendations/comments</b>                                                                                                                                                                                                                                                                                                                               |                             |                      |                        |
|                                                                                                                         |                           |                                                                                                                                                                                                                                                                                                                                                                                                                           | Magnitude of tribenuron-methyl and its<br>relevant metabolites for the risk assessment<br>residue definition should be investigated in<br>pollen and bee products (data gap).                                                                                                                                                                                 |                             |                      |                        |

(a): NEU or SEU for northern or southern outdoor trials in EU member states (N+SEU if both zones), Indoor for glasshouse/protected crops, Country if non-EU location.

- (b): Residue levels in trials conducted according to GAP reported in ascending order (e.g. 3x <0.01, 0.01, 6x 0.02, 0.04, 0.08, 3x 0.10, 2x 0.15, 0.17). When residue definition for monitoring and risk assessment differs, use Mo/RA to differentiate data expressed according to the residue definition for Monitoring and Risk Assessment.
- (c): HR: Highest residue. When residue definition for monitoring and risk assessment differs, HR according to residue definition for monitoring reported in brackets (HRMo).
- (d): STMR: Supervised Trials Median Residue. When residue definition for monitoring and risk assessment differs, STMR according to definition for monitoring reported in brackets (STMRMo). NR=not recommended



**Inputs for animal burden calculations (OPEN)**

NOTE: Livestock dietary burden cannot be finalised for the time being. Pending upon the outcome of the outstanding data on the magnitude of the pertinent compounds identified in primary and rotational crops and their toxicity, the livestock dietary burden calculation should be reconsidered.

**Residues from livestock feeding studies (Regulation (EU) N° 283/2013, Annex Part A, points 6.4.1, 6.4.2, 6.4.3 and 6.4.4) OECD Guideline 505 and OECD Guidance, series on pesticides No 73 (OPEN)**

NOTE: Pending the final livestock dietary burden assessment, the potential transfer in animal matrices may need to be further investigated.

## Conversion Factors (CF) for monitoring to risk assessment

### Animal products (OPEN)

#### Processing factors (Regulation (EU) N° 283/2013, Annex Part A, points 6.5.2 and 6.5.3)

OECD Guideline 508 and OECD Guidance, series on testing and assessment No 96

| Crop (RAC)/Edible part or Crop (RAC)/Processed product         | Number of studies <sup>(a)</sup> | Processing Factor (PF) |           | Conversion Factor (CF <sub>P</sub> ) for RA <sup>(b)</sup> |
|----------------------------------------------------------------|----------------------------------|------------------------|-----------|------------------------------------------------------------|
|                                                                |                                  | Individual values      | Median PF |                                                            |
| <b>Representative uses</b> (row to be deleted if not relevant) |                                  |                        |           |                                                            |
|                                                                |                                  |                        |           |                                                            |

(a): Studies with residues in the RAC at or close to the LOQ should be disregarded (unless concentration)

(b): When the residue definition for risk assessment differs from the residue definition for monitoring

There are no quantifiable residues in cereal grains, olives. However, residue trials according to the representative GAP on sunflower seed were not available. Pending the final decision on the residue definition for risk assessment processing studies may be needed.

#### Consumer risk assessment (Regulation (EU) N° 283/2013, Annex Part A, point 6.9)

**Including all uses** (representative uses and uses related to an MRL application)

Note: **The risk assessment was conducted for residues of tribenuron-methyl only. The risk assessment is not finalised, considering the provisional residue definition for risk assessment and further clarification with regard to the genotoxic potential of metabolites IN-A4098, IN-L5296 and IN-B5685 the consumer risk assessment is not finalised for the representative uses**

##### ADI

TMDI according to EFSA PRIMo

NTMDI, according to (to be specified)

IEDI (% ADI), according to EFSA PRIMo

NEDI (% ADI), according to EFSA PRIMo

Factors included in the calculations

|                                              |
|----------------------------------------------|
| 0.01 mg/kg bw per day                        |
| Highest TMDI: 1.0 % ADI (WHO cluster diet B) |
| Not calculated                               |
| Not calculated                               |
| Highest NEDI: Not applicable                 |
| TMDI: Proposed MRLs                          |

##### ARfD

IESTI (% ARfD), according to EFSA PRIMo

NESTI (% ARfD), according to EFSA PRIMo

Factors included in IESTI and NESTI

|                               |
|-------------------------------|
| 0.2 mg/kg bw                  |
| Highest IESTI: (0.1% (wheat)) |
| Not applicable                |
| IESTI: Proposed MRLs          |

#### Proposed MRLs (Regulation (EU) No 283/2013, Annex Part A, points 6.7.2 and 6.7.3)

| Code <sup>(a)</sup>                                            | Commodity/Group           | MRL/Import tolerance <sup>(b)</sup> ( mg/kg) and Comments |                     |
|----------------------------------------------------------------|---------------------------|-----------------------------------------------------------|---------------------|
| <b>Plant commodities</b>                                       |                           |                                                           |                     |
| <b>Representative uses</b> (row to be deleted if not relevant) |                           |                                                           |                     |
| 0161030                                                        | Table olives              | 0.01*                                                     | MRL proposed at LOQ |
| 0402010                                                        | Olives for oil production | 0.01*                                                     | MRL proposed at LOQ |
| 0500010                                                        | Barley                    | 0.01*                                                     | MRL proposed at LOQ |
| 0500050                                                        | Oat                       | 0.01*                                                     | MRL proposed at LOQ |
| 0500070                                                        | Rye                       | 0.01*                                                     | MRL proposed at LOQ |
| 0500090                                                        | Wheat                     | 0.01*                                                     | MRL proposed at LOQ |
| <b>Animal commodities –no MRLs are proposed</b>                |                           |                                                           |                     |

(a): Commodity code number, as listed in Annex I of Regulation (EC) No 396/2005

(b): MRLs proposed at the LOQ, should be annotated by an asterisk (\*) after the figure.

## Section 4 Environmental fate and behaviour

### Route of degradation (aerobic) in soil (Regulation (EU) N° 283/2013, Annex Part A, point 7.1.1.1)

|                                                                                                     |                                                                                                                                                                                                                                                                               |
|-----------------------------------------------------------------------------------------------------|-------------------------------------------------------------------------------------------------------------------------------------------------------------------------------------------------------------------------------------------------------------------------------|
| Mineralisation after 100 days                                                                       | % after x d, [ <sup>14</sup> C-2-triazine] (n <sup>5</sup> = 9):<br>14.9 (270 d); 16.8 (365 d); 4.6, 4.2, 6.0 (60 d); 4.9, 2.2, 1.5, 4.6 (120 d)<br>% after x d, [ <sup>14</sup> C -U-phenyl]-label (n= 4):<br>64.8 (270 d); 33.8, 35.5, 41.8 (60 d)                          |
| Non-extractable residues after 100 days                                                             | % after x d, [ <sup>14</sup> C-2-triazine] (n=11):<br>23.1 (270 d), 11.4, 16.7 (120 d); 8.1 (365 d); 22.4, 21.7, 26 (60 d); 7.9, 4.6, 5.1, 8.7 (120 d)<br>% after x d, [ <sup>14</sup> C -U-phenyl]-label (n= 4):<br>27.9 (270 d); 34.4, 35.8, 32.4 (60 d)                    |
| Metabolites requiring further consideration<br>- name and/or code, % of applied (range and maximum) | Both <sup>14</sup> C-labels (n=11):<br>IN-00581: up to 33.9%<br>IN-L5296: up to 85.7% (up to 81.7% under sterile conditions)<br>IN-A4098: up to 12.6% (up to 7.3% under sterile conditions)<br>IN-R9805: up to 7.6% (up to 17.2% under sterile conditions)<br>M2: up to 16.2% |

### Route of degradation (anaerobic) in soil (Regulation (EU) N° 283/2013, Annex Part A, point 7.1.1.2)

|                                                                                                                                   |                                                                                                                                                                                                                 |
|-----------------------------------------------------------------------------------------------------------------------------------|-----------------------------------------------------------------------------------------------------------------------------------------------------------------------------------------------------------------|
| Mineralisation after 100 days                                                                                                     | % after x d, [ <sup>14</sup> C-2-triazine] (n= 3):<br>0.3 (117 d); 2.6 (127 d); 1.0 (123 d)<br>% after x d, [ <sup>14</sup> C -U-phenyl]-label (n= 3):<br>0.6 (117 d); 0.5 (127 d); 0.4 (123 d)                 |
| Non-extractable residues after 100 days                                                                                           | % after x d, [ <sup>14</sup> C-2-triazine] (n= 3):<br>11.4 (117 d); 3.2 (127 d); 8.4 (123 d)<br>% after x d, [ <sup>14</sup> C -U-phenyl]-label (n= 3):<br>5.5 (117 d); 5.4 (127 d); 3.5 (123 d)                |
| Metabolites that may require further consideration for risk<br>assessment - name and/or code, % of applied (range and<br>maximum) | Both <sup>14</sup> C-labels (n=3):<br>IN-00581: up to 42.7%,<br>IN-L5296: up to 25.4%<br>IN-R9805: up to 20.8%<br>IN-GK521: up to 32.1%<br>IN-D5119: up to 6.1%<br>IN-R9803: up to 9.1%<br>IN-GN815: up to 6.8% |

### Route of degradation (photolysis) on soil (Regulation (EU) N° 283/2013, Annex Part A, point 7.1.1.3)

|                                                                                                                                   |                                                                                                                                                                                  |
|-----------------------------------------------------------------------------------------------------------------------------------|----------------------------------------------------------------------------------------------------------------------------------------------------------------------------------|
| Metabolites that may require further consideration for risk<br>assessment - name and/or code, % of applied (range and<br>maximum) | Both <sup>14</sup> C-labels (n=3):<br>IN-00581: up to 58.8%<br>IN-L5296: up to 92.9%<br>IN-D5803: up to 46.6%                                                                    |
| Mineralisation at study end                                                                                                       | % after x d, [ <sup>14</sup> C-2-triazine] (n= 2):<br>0 (33 d); 0 (15 d)<br>% after x d, [ <sup>14</sup> C -U-phenyl]-label (n= 3):<br>1.0 (33 d); 1.6 (10 d); 0 (22 d)          |
| Non-extractable residues at study end                                                                                             | % after x d, [ <sup>14</sup> C-2-triazine] (n= 2):<br>0.9 (33 d); 9.7 (15 d)<br>% after x d, [ <sup>14</sup> C -U-phenyl]-label (n= 3):<br>10.0 (33 d); 15.3 (15 d); 18.4 (22 d) |

<sup>5</sup> n corresponds to the number of soils.

**Rate of degradation in soil (aerobic) laboratory studies active substance (Regulation (EU) N° 283/2013, Annex Part A, point 7.1.2.1.1 and Regulation (EU) N° 284/2013, Annex Part A, point 9.1.1.1)**

| Parent                                 | Dark aerobic conditions |                           |                            |                                        |                                                          |                     |                                                                |
|----------------------------------------|-------------------------|---------------------------|----------------------------|----------------------------------------|----------------------------------------------------------|---------------------|----------------------------------------------------------------|
| Soil type                              | X <sup>6</sup>          | pH <sup>a)</sup>          | t. °C / % MWHC             | DT <sub>50</sub> /DT <sub>90</sub> (d) | DT <sub>50</sub> (d)<br>20 °C<br>pF2/10kPa <sup>b)</sup> | St.<br>( $\chi^2$ ) | Method of calculation                                          |
| Gross-Umstadt silt loam                |                         | 7.5<br>(media not stated) | 20°C / 42% MWHC<br>(0 bar) | 16.4/91.3                              | 15.2                                                     | 7                   | FOMC (pers.)<br>SFO (model.)                                   |
| Arrow sandy loam                       |                         | 5.9<br>(media not stated) | 20°C / 60% MWHC            | 1.7 / 11.9                             | 3.6                                                      | 7                   | FOMC: $\alpha=1.27$<br>$\beta=2.35$                            |
| Arrow sandy loam                       |                         | 5.9<br>(media not stated) | 20°C / 40% MWHC            | 1.8 / 13.1                             | - <sup>c)</sup>                                          | 6                   | HS: k1=0.378<br>k2=0.070<br>tb=4.5                             |
| Arrow sandy loam                       |                         | 5.9<br>(media not stated) | 10°C / 60% MWHC            | 12.2 / 61.5                            | - <sup>c)</sup>                                          | 9                   | HS: k1=0.155<br>k2=0.033<br>tb=4.5                             |
| Evesham clay loam                      |                         | 8.3<br>(media not stated) | 20°C / 100% MWHC           | 11.9/39.4                              | 11.9                                                     | 10                  | SFO                                                            |
| Evesham clay loam                      |                         | 8.3<br>(media not stated) | 10°C / 100% MWHC           | 47.5 / 158                             | - <sup>c)</sup>                                          | 9                   | SFO                                                            |
| Riverside sandy silt loam              |                         | 6.8                       | 20°C / 40% MWHC            | 11.6 / 38.6                            | 10.9                                                     | 23                  | SFO                                                            |
| Sion Hill silty loam                   |                         | 6.1                       | 20°C / 40% MWHC            | 5.4 / 17.8                             | 4.2                                                      | 12                  | DFOP (pers.)<br>SFO (model.)                                   |
| Gardena silt loam                      |                         | 7.5<br>(media not stated) | 25°C / 70% FC<br>(pF2)     | 5.1 / 58.9                             | 23.1                                                     | 23                  | HS (pers.)<br>SFO (mod.)                                       |
| Namsheim sandy loam                    |                         | 7.4                       | 20°C / 50% MWHC            | 16.7 / 55.3                            | 16.7                                                     | 5                   | SFO                                                            |
| Lleida clay loam                       |                         | 7.5                       | 20°C / 50% MWHC            | 18.3 / 60.7                            | 16.8                                                     | 4                   | SFO                                                            |
| Speyer sand                            |                         | 5.8                       | 20°C / 50% MWHC            | 1.6 / 18.5                             | 9.0                                                      | 14                  | HS (pers.)<br>FOMC (model.)<br>$\alpha=0.667$<br>$\beta=0.976$ |
| Speyer 5M sandy loam                   |                         | 7.2                       | 20°C / FC (pF2)            | 18.5 / 61.5                            | 18.5                                                     | 6                   | SFO                                                            |
| Am Fishteich silt loam                 |                         | 6.2                       | 20°C / FC (pF2)            | 2.9 / 9.7                              | 2.9                                                      | 14                  | SFO                                                            |
| Loehmingen loam                        |                         | 6.7                       | 20°C / FC (pF2)            | 4.6 / 15.4                             | 4.6                                                      | 11                  | SFO                                                            |
| Speyer 2.2 loamy sand                  |                         | 5.5                       | 20°C / FC (pF2)            | 7.1 / 23.7                             | 7.1                                                      | 11                  | SFO                                                            |
| Geometric mean (if not pH dependent)   |                         |                           |                            |                                        | (9.1)                                                    |                     |                                                                |
| pH dependence, Yes or No               |                         |                           |                            |                                        | Yes                                                      |                     |                                                                |
| Geometric mean soils with pH <7 (n= 7) |                         |                           |                            |                                        | <b>5.4</b>                                               |                     |                                                                |
| Geometric mean soils with pH >7 (n= 6) |                         |                           |                            |                                        | <b>16.7</b>                                              |                     |                                                                |

a) pH measured in CaCl<sub>2</sub> for all soils except where stated otherwise.

b) Normalised using a Q10 of 2.58 and Walker equation coefficient of 0.7.

c) Result not used to calculate mean.

<sup>6</sup> X This column is reserved for any other property that is considered to have a particular impact on the degradation rate. Column and this footnote may be removed if not used.

**Rate of degradation in soil (aerobic) laboratory studies transformation products (Regulation (EU) N° 283/2013, Annex Part A, point 7.1.2.1.2 and Regulation (EU) N° 284/2013, Annex Part A, point 9.1.1.1)**

| IN-L5296                             | Dark aerobic conditions. Parent dosed studies with precursor for the f.f.: parent. Also two studies metabolite (IN-L5296) dosed studies and one metabolite (IN-R9803) dosed study |                        |                         |                                         |                                        |                                                    |                       |                                   |
|--------------------------------------|-----------------------------------------------------------------------------------------------------------------------------------------------------------------------------------|------------------------|-------------------------|-----------------------------------------|----------------------------------------|----------------------------------------------------|-----------------------|-----------------------------------|
| Soil type                            | X <sup>7</sup>                                                                                                                                                                    | pH <sup>a)</sup>       | t. °C / % MWHC          | DT <sub>50</sub> / DT <sub>90</sub> (d) | f. f. k <sub>f</sub> / k <sub>dp</sub> | DT <sub>50</sub> (d) 20 °C pF2/10kPa <sup>b)</sup> | St. (χ <sup>2</sup> ) | Method of calculation             |
| Gross-Umstadt silt loam              |                                                                                                                                                                                   | 7.5 (media not stated) | 20°C / 42% MWHC (0 bar) | 281 / 934                               | 0.77                                   | 185                                                | 11                    | FOMC-SFO (pers.) SFO-SFO (model.) |
|                                      |                                                                                                                                                                                   | 7.4                    | 20°C / 42% MWHC (0 bar) | 204 / 678                               | - <sup>c</sup>                         | 165                                                | 3                     | SFO                               |
| Speyer sand                          |                                                                                                                                                                                   | 5.8                    | 20°C / 50% MWHC         | 151 / 502                               | 0.66                                   | 293                                                | 3                     | HS-SFO (pers.) FOMC-SFO (model.)  |
| Arrow sandy loam                     |                                                                                                                                                                                   | 5.9                    | 20°C / 60% MWHC         | 337 / 1119                              | 0.89                                   | 337                                                | 3                     | FOMC-SFO                          |
|                                      |                                                                                                                                                                                   |                        | 20°C / 40% MWHC         | 505 / 1678                              | 0.87                                   | - <sup>e)</sup>                                    | 4                     | FOMC-SFO                          |
| Mattapex silt loam                   |                                                                                                                                                                                   | 6.6                    | 20°C / 47% MWHC (0 bar) | 105 / 348                               | - <sup>c</sup>                         | 96.5                                               | 6                     | SFO                               |
| Tama silty clay loam                 |                                                                                                                                                                                   | 5.8                    | 20°C / 50% MWHC (0 bar) | 234 / 778                               | 0.66 <sup>d</sup>                      | 234                                                | 7                     | DFOP-SFO                          |
| Cajon loam                           |                                                                                                                                                                                   | 7.3                    | 20°C / 50% MWHC (0 bar) | 251 / 833                               | 0.68 <sup>d</sup>                      | 243                                                | 7                     | DFOP-SFO                          |
| Geometric mean (if not pH dependent) |                                                                                                                                                                                   |                        |                         |                                         |                                        | 207.5                                              |                       |                                   |
| Arithmetic mean                      |                                                                                                                                                                                   |                        |                         |                                         |                                        | 0.76                                               |                       |                                   |
| pH dependence, Yes or No             |                                                                                                                                                                                   |                        |                         |                                         |                                        | No                                                 |                       |                                   |

a) pH measured in CaCl<sub>2</sub> for all soils except where stated otherwise.

b) Normalised using a Q10 of 2.58 and Walker equation coefficient of 0.7.

c) Metabolite-dosed study, hence no formation fraction determined.

d) Formation fraction from precursor IN-R9803 (anaerobic metabolite), not included in mean.

e) Result not used to calculate mean.

**Rate of degradation in soil (aerobic) laboratory studies transformation products (Regulation (EU) N° 283/2013, Annex Part A, point 7.1.2.1.2 and Regulation (EU) N° 284/2013, Annex Part A, point 9.1.1.1)**

| IN-A4098                  | Dark aerobic conditions. Metabolite (IN-A4098) dosed studies. Also one metabolite (IN-L5296) dosed study. |                        |                 |                                         |                                        |                                                    |                       |                                           |
|---------------------------|-----------------------------------------------------------------------------------------------------------|------------------------|-----------------|-----------------------------------------|----------------------------------------|----------------------------------------------------|-----------------------|-------------------------------------------|
| Soil type                 | X <sup>7</sup>                                                                                            | pH <sup>a)</sup>       | t. °C / % MWHC  | DT <sub>50</sub> / DT <sub>90</sub> (d) | f. f. k <sub>f</sub> / k <sub>dp</sub> | DT <sub>50</sub> (d) 20 °C pF2/10kPa <sup>b)</sup> | St. (χ <sup>2</sup> ) | Method of calculation                     |
| Arrow sandy loam          |                                                                                                           | 5.7                    | 20°C / 55% MWHC | 44.7 / 97*                              | - <sup>c</sup>                         | 22.5*                                              | 14                    | Slow phase k in HS DT <sub>50</sub> 22.5* |
| Gartenecker loam          |                                                                                                           | 6.9                    | 20°C / FC (pF2) | 102.2/ 339*                             | - <sup>c</sup>                         | 102.2*                                             | 4                     | SFO                                       |
| 18 Acres, Sandy clay loam |                                                                                                           | 5.0                    | 20°C / FC (pF2) | 249 / 828*                              | - <sup>c</sup>                         | 249*                                               | 1                     | SFO                                       |
| Krone Silt loam           |                                                                                                           | 4.9                    | 20°C / FC (pF2) | 191 / 634*                              | - <sup>c</sup>                         | 191*                                               | 4                     | SFO                                       |
| Honville Silt loam        |                                                                                                           | 6.7 (H <sub>2</sub> O) | 20°C / 40% MWHC | 260.1 / 864*                            | - <sup>c</sup>                         | 201.6*                                             | -*                    | Slow phase k in HS DT <sub>50</sub> 26.1* |

|                                                                                                                    |  |     |                               |               |                  |                  |    |                                     |
|--------------------------------------------------------------------------------------------------------------------|--|-----|-------------------------------|---------------|------------------|------------------|----|-------------------------------------|
| Speyer 2.2<br>Loamy sand                                                                                           |  | 5.7 | 20°C / 45%<br>MWHC            | 60.5 / 285    | - <sup>c</sup>   | 67.5             | 2  | DFOP (pers.)<br>SFO (model.)        |
| Speyer 3A<br>Sandy loam                                                                                            |  | 7.3 | 20°C / 45%<br>MWHC            | 280.4 / >1000 | - <sup>c</sup>   | 385              | 2  | HS: : k1=0.013<br>k2=0.002<br>tb=20 |
| Speyer 6S<br>Clay loam                                                                                             |  | 7.1 | 20°C / 45%<br>MWHC            | 333 / >1000   | - <sup>c</sup>   | 230              | 1  | SFO                                 |
| Gross-Umstadt silt<br>loam                                                                                         |  | 7.4 | 20°C / 42%<br>MWHC (0<br>bar) | 68.9 / 228.9  | 1.0 <sup>d</sup> | 55.6             | 16 | SFO-SFO                             |
| Mattapex silt loam                                                                                                 |  | 6.6 | 20°C / 47%<br>MWHC (0<br>bar) | 94.1 / 313    | 1.0 <sup>d</sup> | 86.7             | 12 | SFO-SFO                             |
| <b>Already peer-reviewed endpoints from studies in other sulfonyl urea dossiers (metabolite applied as parent)</b> |  |     |                               |               |                  |                  |    |                                     |
| Keyport<br>Silt loam                                                                                               |  | 4.3 | 25°C / 70%<br>FC              | 208 / 691*    | - <sup>c</sup>   | 254*             | 6  | SFO                                 |
| Speyer 2.1<br>sand                                                                                                 |  | 5.5 | 20°C / pF2                    | 112.5 / 374*  | - <sup>c</sup>   | 112.5*           | 3  | SFO                                 |
| Soil 115<br>clay loam                                                                                              |  | 8.6 | 20°C / pF2                    | 175.2 / 582   | - <sup>c</sup>   | 175.2*           | 3  | SFO                                 |
| Soil 243<br>sandy loam                                                                                             |  | 5.6 | 20°C / pF2                    | 96.4 / 320.2  | - <sup>c</sup>   | 96.4*            | 6  | SFO                                 |
| Geometric mean (if not pH dependent)                                                                               |  |     |                               |               |                  | 127.7            |    |                                     |
| Median (n=14)                                                                                                      |  |     |                               |               |                  | 143.9            |    |                                     |
| Arithmetic mean                                                                                                    |  |     |                               |               |                  | 1.0 <sup>d</sup> |    |                                     |
| pH dependence, Yes or No                                                                                           |  |     |                               |               |                  | No               |    |                                     |

a) pH measured in CaCl<sub>2</sub> for all soils except where stated otherwise.

b) Normalised using a Q10 of 2.58 and Walker equation coefficient of 0.7.

c) Metabolite-dosed study, hence no formation fraction determined.

d) The f. f. for the formation from the precursor IN-L5296 was not optimised but set to 1.0 as a worst case.

\* Peer-reviewed endpoint as presented in EFSA conclusion on thifensulfuron-methyl (EFSA, 2015c)

Values in brackets not used for calculation of overall mean (results will be subject to Expert's consultation)

#### Rate of degradation in soil (aerobic) laboratory studies transformation products (Regulation (EU) N° 283/2013, Annex Part A, point 7.1.2.1.2 and Regulation (EU) N° 284/2013, Annex Part A, point 9.1.1.1)

| IN-00581                                                                                                           | Dark aerobic conditions. Metabolite (IN-00581) dosed studies. |                  |                               |                                            |                                           |                                                          |                          |                          |
|--------------------------------------------------------------------------------------------------------------------|---------------------------------------------------------------|------------------|-------------------------------|--------------------------------------------|-------------------------------------------|----------------------------------------------------------|--------------------------|--------------------------|
| Soil type                                                                                                          | X <sup>7</sup>                                                | pH <sup>a)</sup> | t. °C / %<br>MWHC             | DT <sub>50</sub> / DT <sub>90</sub><br>(d) | f. f.<br>k <sub>f</sub> / k <sub>dp</sub> | DT <sub>50</sub> (d)<br>20 °C<br>pF2/10kPa <sup>b)</sup> | St.<br>(χ <sup>2</sup> ) | Method of<br>calculation |
| Mattapex<br>Silt loam                                                                                              |                                                               | 6.4              | 20°C / 55%<br>MWHC (0<br>bar) | 237.4 /<br>788.6*                          | - <sup>c</sup>                            | 237.4*                                                   | 4                        | SFO                      |
| Speyer 2.2<br>Loamy sand                                                                                           |                                                               | 5.7              | 20°C / 45%<br>MWHC            | 16.7/ 32.2*                                | - <sup>c</sup>                            | 9.7*                                                     | 5                        | Mod. HS* (DT<br>90/3.32) |
| Speyer 3A<br>Sandy loam                                                                                            |                                                               | 7.3              | 20°C / 45%<br>MWHC            | 16.9 / 34*                                 | - <sup>c</sup>                            | 9.5*                                                     | 5                        | Mod. HS* (DT<br>90/3.32) |
| Speyer 6S<br>Clay loam                                                                                             |                                                               | 7.1              | 20°C / 45%<br>MWHC            | 49.3 / 99.2*                               | - <sup>c</sup>                            | 20.6*                                                    | 6                        | Mod. HS* (DT<br>90/3.32) |
| <b>Already peer-reviewed endpoints from studies in other sulfonyl urea dossiers (metabolite applied as parent)</b> |                                                               |                  |                               |                                            |                                           |                                                          |                          |                          |
| Quincy loamy sand                                                                                                  |                                                               | 6.4              | 20 °C/ 8.2%<br>moisture       | 22.7 / 75.4**                              | - <sup>c</sup>                            | 15.6**                                                   | 7                        | SFO                      |
| Speyer 2.2                                                                                                         |                                                               | 5.7              | 20 / 45%<br>MWHC              | 14.8 / 49.2*                               | - <sup>c</sup>                            | 14.8*                                                    | 13                       | SFO                      |
| Speyer 2.3                                                                                                         |                                                               | 6.9              | 20 / 45%<br>MWHC              | 9.1 / 30.1*                                | - <sup>c</sup>                            | 8.45*                                                    | 16                       | SFO                      |
| Speyer 6S                                                                                                          |                                                               | 7.2              | 20 / 45%<br>MWHC              | 27.5 / 91.2*                               | - <sup>c</sup>                            | 20.47*                                                   | 12                       | SFO                      |
| Geometric mean (if not pH dependent)                                                                               |                                                               |                  |                               |                                            |                                           | 19.1                                                     |                          |                          |
| Arithmetic mean                                                                                                    |                                                               |                  |                               |                                            |                                           | - <sup>c</sup>                                           |                          |                          |
| pH dependence, Yes or No                                                                                           |                                                               |                  |                               |                                            |                                           | No                                                       |                          |                          |

- a) Media in which pH was measured is not reported.  
 b) Normalised using a Q10 of 2.58 and Walker equation coefficient of 0.7.  
 c) Metabolite-dosed study, hence no formation fraction determined.  
 \* Peer-reviewed endpoints as presented in EFSA conclusion on metsulfuron-methyl (EFSA Journal 2015;13(1):3936)  
 \*\* Peer-reviewed endpoint as presented in EFSA conclusion on propoxycarbazone (EFSA Journal 2016;14(10):4612)

**Rate of degradation in soil (aerobic) laboratory studies transformation products (Regulation (EU) N° 283/2013, Annex Part A, point 7.1.2.1.2 and Regulation (EU) N° 284/2013, Annex Part A, point 9.1.1.1)**

| IN-R9805                                                                                                  |                |                  |                          |                                         |                                        |                                                    |                       |                                     |
|-----------------------------------------------------------------------------------------------------------|----------------|------------------|--------------------------|-----------------------------------------|----------------------------------------|----------------------------------------------------|-----------------------|-------------------------------------|
| Dark aerobic conditions. Metabolite (IN-R9805) dosed studies. Also one metabolite (IN-GK521) dosed study. |                |                  |                          |                                         |                                        |                                                    |                       |                                     |
| Soil type                                                                                                 | X <sup>7</sup> | pH <sup>a)</sup> | t. °C / % MWHC           | DT <sub>50</sub> / DT <sub>90</sub> (d) | f. f. k <sub>r</sub> / k <sub>dp</sub> | DT <sub>50</sub> (d) 20 °C pF2/10kPa <sup>b)</sup> | St. (χ <sup>2</sup> ) | Method of calculation               |
| Namsheim sandy loam                                                                                       |                | 7.5              | 20°C / FC                | 91.6/304.4                              | - <sup>c</sup>                         | 91.6                                               | 5                     | SFO                                 |
|                                                                                                           |                | 7.3              | (pF2)<br>20°C / 50% MWHC | 82.8/275.1                              | - <sup>c</sup>                         | 82.8                                               | 3                     | SFO                                 |
| Porterville loam                                                                                          |                | 7.7              | 20°C / FC (pF2)          | 73.9 / 245                              | - <sup>c</sup>                         | 73.9                                               | 8                     | SFO                                 |
| Gross-Umstadt loam                                                                                        |                | 6.3              | 20°C / FC (pF2)          | 172.4/ 921                              | - <sup>c</sup>                         | 330                                                | 5                     | DFOP: k1=0.179<br>k2=0.002<br>g=0.3 |
| Speyer loamy sand                                                                                         |                | 5.5              | 20°C / 50% MWHC (0 bar)  | 97.6 / 324                              | - <sup>c</sup>                         | 97.6 <sup>‡</sup>                                  | 2                     | SFO                                 |
|                                                                                                           |                | 5.3              |                          | 355 / 1178                              | 0.76 <sup>d</sup>                      | 355 <sup>‡</sup>                                   | 7                     | SFO-SFO                             |
| Lleida silty clay                                                                                         |                | 7.7              | 20°C / 50% MWHC (0 bar)  | 86.5 / 287                              | - <sup>c</sup>                         | 79.2                                               | 3                     | SFO                                 |
| Tama silty clay loam                                                                                      |                | 5.4              | 20°C / 50% MWHC (0 bar)  | 91.5 / 304                              | - <sup>c</sup>                         | 84.4 <sup>‡</sup>                                  | 3                     | SFO                                 |
|                                                                                                           |                | 5.7              |                          | 380 / 1262                              | 0.77 <sup>d</sup>                      | 315 <sup>‡</sup>                                   | 3                     | DFOP-SFO                            |
| Sassafras sandy loam                                                                                      |                | 5.6              | 20°C / 50% MWHC (0 bar)  | 90.8 / 302                              | - <sup>c</sup>                         | 90.8                                               | 3                     | SFO                                 |
| Speyer 2.2 loamy sand                                                                                     |                | 5.5              | 20°C / ~37% MWHC         | 26.0 / 86.5                             | - <sup>c</sup>                         | 26.0                                               | 5                     | SFO                                 |
| Fisilis silty clay loam                                                                                   |                | 7.2              | 20°C / ~47% MWHC         | 17.6 / 58.3                             | - <sup>c</sup>                         | 14.1                                               | 6                     | SFO                                 |
| LRA J3 clay loam                                                                                          |                | 7.5              | 20°C / ~41% MWHC         | 42.7 / 142                              | - <sup>c</sup>                         | 29.1                                               | 3                     | SFO                                 |
| Geometric mean (if not pH dependent)                                                                      |                |                  |                          |                                         |                                        | 85.4 <sup>*</sup>                                  |                       |                                     |
| Median (n= 13)                                                                                            |                |                  |                          |                                         |                                        | 84.4                                               |                       |                                     |
| Arithmetic mean                                                                                           |                |                  |                          |                                         |                                        | - <sup>c</sup>                                     |                       |                                     |
| pH dependence, Yes or No                                                                                  |                |                  |                          |                                         |                                        | No                                                 |                       |                                     |

- a) pH measured in CaCl<sub>2</sub> for all soils.  
 b) Normalised using a Q10 of 2.58 and Walker equation coefficient of 0.7.  
 c) Metabolite-dosed study, hence no formation fraction determined (f.f. = 1 used in FOCUS GW modelling).  
 d) Formation fraction from precursor IN-GK521 (anaerobic metabolite).  
 \* In case of two or more values for the same soil (and same type of study) the geometric mean DT50 was first calculated. A single value was used for each soil to derive overall geomean.

**Rate of degradation in soil (aerobic) laboratory studies transformation products (Regulation (EU) N° 283/2013, Annex Part A, point 7.1.2.1.2 and Regulation (EU) N° 284/2013, Annex Part A, point 9.1.1.1)**

| M2                                                      |  |
|---------------------------------------------------------|--|
| Dark aerobic conditions. Metabolite (M2) dosed studies. |  |

| Soil type                            | X <sup>7</sup> | pH <sup>a)</sup> | t. °C / %<br>MWHC   | DT <sub>50</sub> / DT <sub>90</sub><br>(d) | f. f.<br>k <sub>f</sub> / k <sub>dp</sub> | DT <sub>50</sub> (d)<br>20 °C<br>pF2/10kPa <sup>b)</sup> | St.<br>(χ <sup>2</sup> ) | Method of<br>calculation                                       |
|--------------------------------------|----------------|------------------|---------------------|--------------------------------------------|-------------------------------------------|----------------------------------------------------------|--------------------------|----------------------------------------------------------------|
| Speyer 2.2. loamy sand               |                | 5.5              | 20°C / ~37%<br>MWHC | 11.0 / 36.5                                | - <sup>c</sup>                            | 11.0                                                     | 5                        | FOMC (pers.):<br>α=2.16 β=25.3<br>SFO (model.)                 |
| Fisilis silty clay loam              |                | 7.2              | 20°C / ~46%<br>MWHC | 20.6 / 68.4                                | - <sup>c</sup>                            | 16.5                                                     | 5                        | HS (pers.):<br>k1=0.044<br>k2=0.015<br>tb=18.9<br>SFO (model.) |
| LRA J3 clay loam                     |                | 7.5              | 20°C / ~42%<br>MWHC | 23.3 / 77.2                                | - <sup>c</sup>                            | 16.1                                                     | 3                        | HS (pers.):<br>k1=0.045<br>k2=0.012<br>tb=16.9<br>SFO (model.) |
| Arrow sandy loam                     |                | 5.9              | 20°C/60%<br>MWHC    | 73.2 / 244                                 | 0.04                                      | 73.2                                                     | 17                       | FOMC-SFO                                                       |
|                                      |                |                  | 10°C/60%<br>MWHC    | 64.3 / 214                                 | 0.06                                      | - <sup>d</sup>                                           | 18                       | HS-SFO                                                         |
| Geometric mean (if not pH dependent) |                |                  |                     |                                            |                                           | 21.5                                                     |                          |                                                                |
| Arithmetic mean                      |                |                  |                     |                                            | - <sup>e</sup><br>0.05                    |                                                          |                          |                                                                |
| pH dependence, Yes or No             |                |                  |                     |                                            |                                           | No                                                       |                          |                                                                |

a) pH measured in CaCl<sub>2</sub> for all soils.

b) Normalised using a Q10 of 2.58 and Walker equation coefficient of 0.7.

c) Metabolite-dosed study, hence no formation fraction determined.

d) Result not used to calculate mean.

#### Rate of degradation in soil (aerobic) laboratory studies transformation products (Regulation (EU) N° 283/2013, Annex Part A, point 7.1.2.1.2 and Regulation (EU) N° 284/2013, Annex Part A, point 9.1.1.1)

| IN-D5803                                                      |                |                  |                               |                                            |                                           |                                                          |                          |                          |
|---------------------------------------------------------------|----------------|------------------|-------------------------------|--------------------------------------------|-------------------------------------------|----------------------------------------------------------|--------------------------|--------------------------|
| Dark aerobic conditions. Metabolite (IN-D5803) dosed studies. |                |                  |                               |                                            |                                           |                                                          |                          |                          |
| Soil type                                                     | X <sup>7</sup> | pH <sup>a)</sup> | t. °C / %<br>MWHC             | DT <sub>50</sub> / DT <sub>90</sub><br>(d) | f. f.<br>k <sub>f</sub> / k <sub>dp</sub> | DT <sub>50</sub> (d)<br>20 °C<br>pF2/10kPa <sup>b)</sup> | St.<br>(χ <sup>2</sup> ) | Method of<br>calculation |
| Lleida clay loam                                              |                | 8.0              | 20°C / 50%<br>MWHC (0<br>bar) | 1.0 / 3.2*                                 | - <sup>c</sup>                            | 0.9*                                                     | 3                        | SFO                      |
| Tama silty clay loam                                          |                | 6.1              | 20°C / 50%<br>MWHC (0<br>bar) | 5.1 / 17.1*                                | - <sup>c</sup>                            | 4.1*                                                     | 8                        | SFO                      |
| Speyer 2.2 loamy sand                                         |                | 6.3              | 20°C / 50%<br>MWHC (0<br>bar) | 1.9 / 6.1*                                 | - <sup>c</sup>                            | 1.9*                                                     | 21                       | SFO                      |
|                                                               |                | 5.7              | 20°C / 45%<br>MWHC            | 11.7 / 38.8*                               | - <sup>c</sup>                            | 11.7*                                                    | 4                        | SFO                      |
| Gross-Umstadt loam                                            |                | 7.3              | 20°C / 50%<br>MWHC (0<br>bar) | 1.3 / 4.5*                                 | - <sup>c</sup>                            | 1.2*                                                     | 9                        | SFO                      |
| Sassafras sandy loam                                          |                | 5.7              | 20°C / 50%<br>MWHC (0<br>bar) | 9.2 / 87.7*                                | - <sup>c</sup>                            | 26.4*                                                    | -*                       | FOMC<br>DT90/3.32        |
| Speyer 3A<br>Sandy loam                                       |                | 7.3              | 20°C / 45%<br>MWHC            | 1.9 / 6.4*                                 | - <sup>c</sup>                            | 1.8*                                                     | 6                        | SFO                      |
| Speyer 6S clay loam                                           |                | 7.1              | 20°C / 45%<br>MWHC            | 3.4 / 11.1*                                | - <sup>e</sup>                            | 2.3*                                                     | 4                        | SFO                      |
| Geometric mean (if not pH dependent)                          |                |                  |                               |                                            |                                           | 3.2                                                      |                          |                          |
| Arithmetic mean                                               |                |                  |                               |                                            | - <sup>c</sup>                            |                                                          |                          |                          |
| pH dependence, Yes or No                                      |                |                  |                               |                                            |                                           | No                                                       |                          |                          |

a) pH measured in CaCl<sub>2</sub> for all soils.

b) Normalised using a Q10 of 2.58 and Walker equation coefficient of 0.7.

c) Metabolite-dosed study, hence no formation fraction determined (f.f. = 1 used in FOCUS GW modelling)..



\* Peer-reviewed endpoints as presented in EFSA conclusion on metsulfuron-methyl (EFSA Journal 2015;13(1):3936)

**Rate of degradation in soil (aerobic) laboratory studies transformation products (Regulation (EU) N° 283/2013, Annex Part A, point 7.1.2.1.2 and Regulation (EU) N° 284/2013, Annex Part A, point 9.1.1.1)**

| <b>IN-R9803</b>                                               |                |                  |                         |                                         |                                        |                                                    |                       |                                                               |
|---------------------------------------------------------------|----------------|------------------|-------------------------|-----------------------------------------|----------------------------------------|----------------------------------------------------|-----------------------|---------------------------------------------------------------|
| Dark aerobic conditions. Metabolite (IN-R9803) dosed studies. |                |                  |                         |                                         |                                        |                                                    |                       |                                                               |
| Soil type                                                     | X <sup>7</sup> | pH <sup>a)</sup> | t. °C / % MWHC          | DT <sub>50</sub> / DT <sub>90</sub> (d) | f. f. k <sub>f</sub> / k <sub>dp</sub> | DT <sub>50</sub> (d) 20 °C pF2/10kPa <sup>b)</sup> | St. (χ <sup>2</sup> ) | Method of calculation                                         |
| Speyer loamy sand                                             |                | 5.2              | 20°C / 50% MWHC (0 bar) | 6.1 / 45.0                              | - <sup>c</sup>                         | 17.6                                               | 7                     | FOMC: α=0.95<br>β=5.63                                        |
| Lleida silty clay                                             |                | 7.5              | 20°C / 50% MWHC (0 bar) | 3.2 / 22.0                              | - <sup>c</sup>                         | 6.3                                                | 4                     | FOMC: α=1.3<br>β=4.49                                         |
| Tama silty clay loam                                          |                | 5.8              | 20°C / 50% MWHC (0 bar) | 3.3 / 43.3                              | - <sup>c</sup>                         | 13.0                                               | 4                     | FOMC: α=0.77<br>β=2.29                                        |
| Nambsheim sandy loam                                          |                | 7.3              | 20°C / 50% MWHC (0 bar) | 5.2 / 54.2                              | - <sup>c</sup>                         | 16.3                                               | 9                     | FOMC: α=0.89<br>β=4.41                                        |
| Cajon loam                                                    |                | 7.3              | 20°C / 45% MWHC         | 2.6 / 39.0                              | - <sup>c</sup>                         | 17.7                                               | 4                     | DFOP: k <sub>1</sub> =0.647<br>k <sub>2</sub> =0.038<br>g=0.6 |
| Geometric mean (if not pH dependent)                          |                |                  |                         |                                         |                                        | 13.3                                               |                       |                                                               |
| Arithmetic mean                                               |                |                  |                         |                                         |                                        | - <sup>c</sup>                                     |                       |                                                               |
| pH dependence, Yes or No                                      |                |                  |                         |                                         |                                        | No                                                 |                       |                                                               |

a) pH measured in CaCl<sub>2</sub> for all soils.

b) Normalised using a Q10 of 2.58 and Walker equation coefficient of 0.7.

c) Metabolite-dosed study, hence no formation fraction determined (f.f. = 1 used in FOCUS GW modelling).

**Rate of degradation in soil (aerobic) laboratory studies transformation products (Regulation (EU) N° 283/2013, Annex Part A, point 7.1.2.1.2 and Regulation (EU) N° 284/2013, Annex Part A, point 9.1.1.1)**

| <b>IN-GN815</b>                                               |                |                  |                         |                                         |                                        |                                                    |                       |                                                                                          |
|---------------------------------------------------------------|----------------|------------------|-------------------------|-----------------------------------------|----------------------------------------|----------------------------------------------------|-----------------------|------------------------------------------------------------------------------------------|
| Dark aerobic conditions. Metabolite (IN-GN815) dosed studies. |                |                  |                         |                                         |                                        |                                                    |                       |                                                                                          |
| Soil type                                                     | X <sup>7</sup> | pH <sup>a)</sup> | t. °C / % MWHC          | DT <sub>50</sub> / DT <sub>90</sub> (d) | f. f. k <sub>f</sub> / k <sub>dp</sub> | DT <sub>50</sub> (d) 20 °C pF2/10kPa <sup>b)</sup> | St. (χ <sup>2</sup> ) | Method of calculation                                                                    |
| Speyer sandy loam                                             |                | 5.2              | 20°C / 50% MWHC (0 bar) | 7.0 / 29.1                              | - <sup>c</sup>                         | 7.9                                                | 3                     | DFOP (pers.):<br>k <sub>1</sub> =0.965<br>k <sub>2</sub> =0.073<br>g=0.2<br>SFO (model.) |
| Lleida silty clay                                             |                | 7.5              | 20°C / 50% MWHC (0 bar) | 6.3 / 32.9                              | - <sup>c</sup>                         | 6.8                                                | 5                     | DFOP (pers.):<br>k <sub>1</sub> =0.574 k <sub>2</sub> =0.06<br>g=0.3<br>SFO (model.)     |
| Tama silty clay loam                                          |                | 5.6              | 20°C / 50% MWHC (0 bar) | 5.0 / 27.5                              | - <sup>c</sup>                         | 5.4                                                | 4                     | DFOP (pers.):<br>k <sub>1</sub> =0.725<br>k <sub>2</sub> =0.077<br>g=0.3<br>SFO (model.) |
| Nambsheim sandy loam                                          |                | 7.5              | 20°C / 50% MWHC (0 bar) | 9.2 / 40.9                              | - <sup>c</sup>                         | 10.9                                               | 4                     | DFOP (pers.):<br>k <sub>1</sub> =0.861<br>k <sub>2</sub> =0.051<br>g=0.2<br>SFO (model.) |

|                                      |  |     |                               |             |                |      |    |     |
|--------------------------------------|--|-----|-------------------------------|-------------|----------------|------|----|-----|
| Sassafras loamy sand                 |  | 4.9 | 20°C / 50%<br>MWHC (0<br>bar) | 7.2 / 30.9  | - <sup>c</sup> | 8.2  | 4  | SFO |
| Speyer 2.2 loamy sand                |  | 5.5 | 20°C / 37%<br>MWHC            | 4.0 / 13.3  | - <sup>c</sup> | 4.0  | 11 | SFO |
| Fisilis silty clay loam              |  | 6.1 | 20°C / 46%<br>MWHC            | 5.6 / 18.6  | - <sup>c</sup> | 4.5  | 10 | SFO |
| LRA J3 clay loam                     |  | 7.5 | 20°C / 43%<br>MWHC            | 23.5 / 78.0 | - <sup>c</sup> | 16.2 | 6  | SFO |
| Geometric mean (if not pH dependent) |  |     |                               |             |                | 7.2  |    |     |
| Arithmetic mean                      |  |     |                               |             | - <sup>c</sup> |      |    |     |
| pH dependence, Yes or No             |  |     |                               |             |                | No   |    |     |

a) pH measured in CaCl<sub>2</sub> for all soils.

b) Normalised using a Q10 of 2.58 and Walker equation coefficient of 0.7.

c) Metabolite-dosed study, hence no formation fraction determined.

#### Rate of degradation in soil (aerobic) laboratory studies transformation products (Regulation (EU) N° 283/2013, Annex Part A, point 7.1.2.1.2 and Regulation (EU) N° 284/2013, Annex Part A, point 9.1.1.1)

| IN-GK521                                                      |                |                  |                               |                                            |                                           |                                                          |                          |                                                                |
|---------------------------------------------------------------|----------------|------------------|-------------------------------|--------------------------------------------|-------------------------------------------|----------------------------------------------------------|--------------------------|----------------------------------------------------------------|
| Dark aerobic conditions. Metabolite (IN-GK521) dosed studies. |                |                  |                               |                                            |                                           |                                                          |                          |                                                                |
| Soil type                                                     | X <sup>7</sup> | pH <sup>a)</sup> | t. °C / %<br>MWHC             | DT <sub>50</sub> / DT <sub>90</sub><br>(d) | f. f.<br>k <sub>r</sub> / k <sub>dp</sub> | DT <sub>50</sub> (d)<br>20 °C<br>pF2/10kPa <sup>b)</sup> | St.<br>(χ <sup>2</sup> ) | Method of<br>calculation                                       |
| Speyer sandy loam                                             |                | 5.3              | 20°C / 50%<br>MWHC (0<br>bar) | 4.8 / 15.9                                 | - <sup>c</sup>                            | 4.8                                                      | 5                        | SFO                                                            |
| Lleida silty clay                                             |                | 7.7              | 20°C / 50%<br>MWHC (0<br>bar) | 38.8 / 128.8                               | - <sup>c</sup>                            | 32.6                                                     | 9                        | SFO                                                            |
| Tama silty clay loam                                          |                | 5.7              | 20°C / 50%<br>MWHC (0<br>bar) | 5.0 / 25.7                                 | - <sup>c</sup>                            | 4.2                                                      | 4                        | DFOP (pers.):<br>k1=0.725<br>k2=0.077<br>g=0.3<br>SFO (model.) |
| Nambsheim sandy loam                                          |                | 7.5              | 20°C / 50%<br>MWHC (0<br>bar) | 33.0 / 109.7                               | - <sup>c</sup>                            | 33.0                                                     | 8                        | SFO                                                            |
| Sassafras loamy sand                                          |                | 4.7              | 20°C / 50%<br>MWHC (0<br>bar) | 7.9 / 31.5                                 | - <sup>c</sup>                            | 8.8                                                      | 3                        | DFOP (pers.):<br>k1=1.97 k2=0.068<br>g=0.1<br>SFO (model.)     |
| Speyer 2.2 loamy sand                                         |                | 5.5              | 20°C / 36%<br>MWHC            | 9.4 / 31.3                                 | - <sup>c</sup>                            | 9.4                                                      | 11                       | SFO                                                            |
| Fisilis silty clay loam                                       |                | 6.1              | 20°C / 46%<br>MWHC            | 9.5 / 31.5                                 | - <sup>c</sup>                            | 7.7                                                      | 10                       | SFO                                                            |
| LRA J3 clay loam                                              |                | 7.5              | 20°C / 40%<br>MWHC            | 51.9 / 172                                 | - <sup>c</sup>                            | 34.0                                                     | 6                        | SFO                                                            |
| Geometric mean (if not pH dependent)                          |                |                  |                               |                                            |                                           | 12.1                                                     |                          |                                                                |
| Arithmetic mean                                               |                |                  |                               |                                            | - <sup>c</sup>                            |                                                          |                          |                                                                |
| pH dependence, Yes or No                                      |                |                  |                               |                                            |                                           | No                                                       |                          |                                                                |

a) pH measured in CaCl<sub>2</sub> for all soils.

b) Normalised using a Q10 of 2.58 and Walker equation coefficient of 0.7.

c) Metabolite-dosed study, hence no formation fraction determined.

#### Rate of degradation in soil (aerobic) laboratory studies transformation products (Regulation (EU) N° 283/2013, Annex Part A, point 7.1.2.1.2 and Regulation (EU) N° 284/2013, Annex Part A, point 9.1.1.1)

| IN-D5119                                                      |                |                  |                   |                                            |                                           |                                                          |                          |                          |
|---------------------------------------------------------------|----------------|------------------|-------------------|--------------------------------------------|-------------------------------------------|----------------------------------------------------------|--------------------------|--------------------------|
| Dark aerobic conditions. Metabolite (IN-D5119) dosed studies. |                |                  |                   |                                            |                                           |                                                          |                          |                          |
| Soil type                                                     | X <sup>7</sup> | pH <sup>a)</sup> | t. °C / %<br>MWHC | DT <sub>50</sub> / DT <sub>90</sub><br>(d) | f. f.<br>k <sub>r</sub> / k <sub>dp</sub> | DT <sub>50</sub> (d)<br>20 °C<br>pF2/10kPa <sup>b)</sup> | St.<br>(χ <sup>2</sup> ) | Method of<br>calculation |

|                                                                                                                    |  |     |                         |                |                |                |    |     |
|--------------------------------------------------------------------------------------------------------------------|--|-----|-------------------------|----------------|----------------|----------------|----|-----|
| Lleida silty clay                                                                                                  |  | 7.9 | 20°C / 50% MWHC (0 bar) | 7.4 / 24.5*    | - <sup>c</sup> | 6.6*           | 14 | SFO |
| Sassafras Sand                                                                                                     |  | 5.3 | 20°C / 50% MWHC (0 bar) | 15.6 / 51.8    | - <sup>c</sup> | 15.6           | 8  | SFO |
| Tama silty clay loam                                                                                               |  | 6.1 | 20°C / 50% MWHC (0 bar) | 5.9 / 19.6*    | - <sup>c</sup> | 4.8*           | 8  | SFO |
| Speyer 2.2 loamy sand                                                                                              |  | 6.3 | 20°C / 50% MWHC (0 bar) | 7.2 / 23.8*    | - <sup>c</sup> | 7.2*           | 10 | SFO |
| Nambsheim sandy loam                                                                                               |  | 7.4 | 20°C / 50% MWHC (0 bar) | 9.6 / 31.9*    | - <sup>c</sup> | 9.0*           | 10 | SFO |
| Speyer 2.2 loamy sand                                                                                              |  | 5.7 | 20°C / 45% MWHC         | 10.1 / 33.7*   | - <sup>c</sup> | 10.1*          | 7  | SFO |
| Speyer 3A sandy loam                                                                                               |  | 7.3 | 20°C / 45% MWHC         | 12.6 / 41.9*   | - <sup>c</sup> | 11.8*          | 7  | SFO |
| Speyer 6S clay loam                                                                                                |  | 7.1 | 20°C / 45% MWHC         | 115.7 / 384.4* | - <sup>c</sup> | 79.9*          | 3  | SFO |
| <b>Already peer-reviewed endpoints from studies in other sulfonyl urea dossiers (metabolite applied as parent)</b> |  |     |                         |                |                |                |    |     |
| LUFA Speyer 2.2 loamy sand                                                                                         |  | 5.5 | -                       | 36.2 / 120.2*  | - <sup>c</sup> | 36.2*          | 6  | SFO |
| LUFA Speyer 3A sandy loam                                                                                          |  | 6.8 | -                       | 17.7 / 58.8*   | - <sup>c</sup> | 17.7*          | 8  | SFO |
| LUFA Speyer 6S clay                                                                                                |  | 7.1 | -                       | 31.1 / 103.4*  | - <sup>c</sup> | 31.1*          | 14 | SFO |
| Geometric mean (if not pH dependent)-(n=11)                                                                        |  |     |                         |                |                | 14.5           |    |     |
| Arithmetic mean                                                                                                    |  |     |                         |                |                | - <sup>c</sup> |    |     |
| pH dependence, Yes or No                                                                                           |  |     |                         |                |                | No             |    |     |

a) pH measured in CaCl<sub>2</sub> for all soils.

b) Normalised using a Q10 of 2.58 and Walker equation coefficient of 0.7.

c) Metabolite-dosed study, hence no formation fraction determined.

\*Peer-reviewed endpoints as presented in EFSA conclusion on metsulfuron-methyl (EFSA Journal 2015;13(1):3936)

**Rate of degradation field soil dissipation studies (Regulation (EU) N° 283/2013, Annex Part A, point 7.1.2.2.1 and Regulation (EU) N° 284/2013, Annex Part A, point 9.1.1.2.1)**

| Parent                                                 | Aerobic conditions               |   |                  |            |                             |                             |                  |                                         |                       |
|--------------------------------------------------------|----------------------------------|---|------------------|------------|-----------------------------|-----------------------------|------------------|-----------------------------------------|-----------------------|
| Soil type (indicate if bare or cropped soil was used). | Location (country or USA state). | X | pH <sup>a)</sup> | Depth (cm) | DT <sub>50</sub> (d) actual | DT <sub>90</sub> (d) actual | St. ( $\chi^2$ ) | DT <sub>50</sub> (d) Norm <sup>b)</sup> | Method of calculation |
| Clay loam (bare)                                       | United Kingdom                   |   | 7.6              | 0-30       | 34.7                        | 115                         | 6                | 10.4                                    | SFO                   |
| Silt loam (bare)                                       | N Germany                        |   | 6.6              | 0-30       | 2.6                         | 8.7                         | 7                | 2.7                                     | FOMC DT90/3.32        |
| Clay (bare)                                            | Spain                            |   | 8.1              | 0-30       | 5.8                         | 19.3                        | 8                | 5.1                                     | SFO                   |
| Loam (bare)                                            | Italy                            |   | 6.1              | 0-30       | 0.5                         | 5.8                         | 4                | 1.7                                     | FOMC DT90/3.32        |
| Silt loam (bare)                                       | N France                         |   | 6.5              | 0-30       | 1.7 (3.4 <sup>c</sup> )     | 11.2                        | 3                | 5.2                                     | DFOP (slow phase)     |
| Saint Genouph                                          | N France                         |   | 7.9              | 0-30       | 1.5                         | 5.1                         | - <sup>d</sup>   | - <sup>d</sup>                          | - <sup>d</sup>        |
| Frankenhardt                                           | S Germany                        |   | 7.2              | 0-30       | 5.6                         | 19                          | - <sup>d</sup>   | - <sup>d</sup>                          | - <sup>d</sup>        |
| Saint Loubert,                                         | S France                         |   | 5.2              | 0-30       | 0.58 (4.5 <sup>c</sup> )    | 10.7                        | 8.8              | 2.2                                     | SFO                   |
| Villena                                                | Spain                            |   | 8.2              | 0-30       | 2.5 (3.5 <sup>c</sup> )     | 11.7                        | 4                | 3.0                                     | SFO                   |
| Geometric mean (if not pH dependent)                   |                                  |   |                  |            |                             |                             |                  | <b>3.6</b>                              |                       |
| pH dependence, Yes or No                               |                                  |   |                  |            | No                          |                             |                  |                                         |                       |

a) Measured in water.

b) Values are DegT<sub>50matrix</sub> and normalised using a Q10 of 2.58 and Walker equation coefficient of 0.7.

c) Back-calculated DT<sub>50</sub>; DT<sub>50</sub> = DT<sub>90</sub>/3.32 or slow phase DFOP.

d) Modelling endpoints cannot be calculated due to significant levels of residues of tribenuron-methyl in the deepest sampled soil layer

| <b>IN-00581</b>                                                          |           |   |                  |            |                             |                             |                  |                                         |                                        |                       |
|--------------------------------------------------------------------------|-----------|---|------------------|------------|-----------------------------|-----------------------------|------------------|-----------------------------------------|----------------------------------------|-----------------------|
| Aerobic conditions. Parent dosed studies. Precursor for the f.f.: parent |           |   |                  |            |                             |                             |                  |                                         |                                        |                       |
| Soil type                                                                | Location  | X | pH <sup>a)</sup> | Depth (cm) | DT <sub>50</sub> (d) actual | DT <sub>90</sub> (d) actual | St. ( $\chi^2$ ) | DT <sub>50</sub> (d) Norm <sup>b)</sup> | f. f. k <sub>f</sub> / k <sub>dp</sub> | Method of calculation |
| Goch-Nierswalde                                                          | N Germany |   | 6.6              | 0-30       | 4.5                         | 15.0                        | 9                | 4.5                                     | 0.61                                   | FOMC-SFO              |
| Termens                                                                  | Spain     |   | 8.1              | 0-30       | 10.6                        | 35.1                        | 8                | 10.6                                    | 0.39                                   | SFO-SFO               |
| Graffignana                                                              | Italy     |   | 6.1              | 0-30       | 7.4                         | 24.7                        | 12               | 7.4                                     | 0.64                                   | FOMC-SFO              |
| Douai                                                                    | N France  |   | 6.5              | 0-30       | 6.5                         | 21.6                        | 17               | 6.5                                     | 0.55                                   | FOMC-SFO              |
| Frankenhardt,                                                            | Germany   |   | 6.7              | 0-30       | 26.4                        | 87.7                        | - <sup>c</sup>   | - <sup>c</sup>                          | - <sup>c</sup>                         | SFO-SFO               |
| Geometric mean (if not pH dependent)                                     |           |   |                  |            |                             |                             |                  | <b>6.9</b>                              |                                        |                       |
| Arithmetic mean                                                          |           |   |                  |            |                             |                             |                  |                                         | <b>0.55</b>                            |                       |
| pH dependence, Yes or No                                                 |           |   |                  |            | No                          |                             |                  |                                         |                                        |                       |

a) Measured in water.

b) Normalised using a Q10 of 2.58 and Walker equation coefficient of 0.7.

c) Modelling endpoints cannot be calculated due to significant levels of residues of tribenuron-methyl in the deepest sampled soil layer

| <b>IN-L5296</b>                                                          |          |   |                  |            |                             |                             |                  |                                         |                                        |                       |
|--------------------------------------------------------------------------|----------|---|------------------|------------|-----------------------------|-----------------------------|------------------|-----------------------------------------|----------------------------------------|-----------------------|
| Aerobic conditions. Parent dosed studies. Precursor for the f.f.: parent |          |   |                  |            |                             |                             |                  |                                         |                                        |                       |
| Soil type                                                                | Location | X | pH <sup>a)</sup> | Depth (cm) | DT <sub>50</sub> (d) actual | DT <sub>90</sub> (d) actual | St. ( $\chi^2$ ) | DT <sub>50</sub> (d) Norm <sup>b)</sup> | f. f. k <sub>f</sub> / k <sub>dp</sub> | Method of calculation |
| Graffignana                                                              | Italy    |   | 6.1              | 0-30       | 171                         | 1312                        | - <sup>d</sup>   | - <sup>d</sup>                          | - <sup>d</sup>                         | DFOP <sup>c</sup>     |
| Douai                                                                    | N France |   | 6.5              | 0-30       | 431                         | 1433                        | - <sup>d</sup>   | - <sup>d</sup>                          | - <sup>d</sup>                         | SFO <sup>c</sup>      |
| Frankenhardt,                                                            | Germany  |   | 6.7              | 0-30       | 93.8                        | 312                         | - <sup>e</sup>   | - <sup>e</sup>                          | - <sup>e</sup>                         | SFO-SFO               |
| Saint Loubert                                                            | S France |   | 5.2              | 0-30       | 47.5                        | 490                         | - <sup>d</sup>   | - <sup>d</sup>                          | - <sup>d</sup>                         | HS <sup>c</sup>       |
| Villena                                                                  | Spain    |   | 8.2              | 0-30       | 174                         | 578                         | 12               | 174                                     | 0.31                                   | DFOP-SFO              |
| Geometric mean (if not pH dependent)                                     |          |   |                  |            |                             |                             |                  | <b>174</b>                              |                                        |                       |
| Arithmetic mean                                                          |          |   |                  |            |                             |                             |                  |                                         | <b>0.31</b>                            |                       |
| pH dependence, Yes or No                                                 |          |   |                  |            | No                          |                             |                  |                                         |                                        |                       |

a) Measured in water.

b) Normalised using a Q10 of 2.58 and Walker equation coefficient of 0.7.

c) Decline fit from peak level

d) No acceptable fit for monitoring

e) Modelling endpoints cannot be calculated due to significant levels of residues of tribenuron-methyl in the deepest sampled soil layer

### Combined laboratory and field kinetic endpoints for modelling (when not from different populations) \*

Rate of degradation in soil active substance, normalised geometric mean (if not pH dependent)

|    |    |
|----|----|
| -- |    |
| -- | -- |
| -- | -- |

Rate of degradation in soil transformation products, normalised geometric mean (if not pH dependent)

Kinetic formation fraction (f. f.  $k_f / k_{dp}$ ) of transformation products, arithmetic mean

\* Only relevant after implementation of the published EFSA guidance describing how to amalgamate laboratory and field endpoints.

### Soil accumulation (Regulation (EU) N° 283/2013, Annex Part A, point 7.1.2.2.2 and Regulation (EU) N° 284/2013, Annex Part A, point 9.1.1.2.2)

Soil accumulation and plateau concentration

No study available, not requested.  
For calculated PEC<sub>plateau</sub> see section on PEC<sub>soil</sub>.

### Rate of degradation in soil (anaerobic) laboratory studies active substance (Regulation (EU) N° 283/2013, Annex Part A, point 7.1.2.1.3 and Regulation (EU) N° 284/2013, Annex Part A, point 9.1.1.1)

| Parent                               | Dark anaerobic conditions |                  |                |                                         |                                          |                       |                       |
|--------------------------------------|---------------------------|------------------|----------------|-----------------------------------------|------------------------------------------|-----------------------|-----------------------|
| Soil type                            | X <sup>7</sup>            | pH <sup>a)</sup> | t. °C / % MWHC | DT <sub>50</sub> / DT <sub>90</sub> (d) | DT <sub>50</sub> (d) 20 °C <sup>b)</sup> | St. (χ <sup>2</sup> ) | Method of calculation |
| Gross-Umstadt loam                   |                           | 6.1              | 20°C / flooded | 72 / 239                                | -                                        | 4                     | SFO                   |
| Bettlach Bh silt loam                |                           | 7.3              | 20°C / flooded | 45.6 / 151                              | -                                        | 6                     | SFO                   |
| Speyer 3A loam                       |                           | 7.2              | 20°C / flooded | 123 / 409                               | -                                        | 3                     | SFO                   |
| Geometric mean (if not pH dependent) |                           |                  |                |                                         | -                                        |                       |                       |

a) pH measured in CaCl<sub>2</sub> for all soils.

b) Normalised using a Q10 of 2.58.

### Rate of degradation in soil (anaerobic) laboratory studies transformation products (Regulation (EU) N° 283/2013, Annex Part A, point 7.1.2.1.4 and Regulation (EU) N° 284/2013, Annex Part A, point 9.1.1.1)

| IN-L5296                             | Dark anaerobic conditions. Parent dosed studies with precursor for the f.f.: parent |                  |                |                                         |                      |                                         |                       |                       |
|--------------------------------------|-------------------------------------------------------------------------------------|------------------|----------------|-----------------------------------------|----------------------|-----------------------------------------|-----------------------|-----------------------|
| Soil type                            | X <sup>10</sup>                                                                     | pH <sup>a)</sup> | t. °C / % MWHC | DT <sub>50</sub> / DT <sub>90</sub> (d) | f. f. $k_f / k_{dp}$ | DT <sub>50</sub> (d) 20°C <sup>b)</sup> | St. (χ <sup>2</sup> ) | Method of calculation |
| Gross-Umstadt loam                   |                                                                                     | 6.1              | 20°C / flooded | 216 / 719                               | 0.39                 | -                                       | 8                     | SFO-SFO               |
| Geometric mean (if not pH dependent) |                                                                                     |                  |                |                                         |                      | -                                       |                       |                       |
| Arithmetic mean                      |                                                                                     |                  |                |                                         | 0.39                 |                                         |                       |                       |

a) pH measured in CaCl<sub>2</sub>.

b) Normalised using a Q10 of 2.58.

### Rate of degradation in soil (anaerobic) laboratory studies transformation products (Regulation (EU) N° 283/2013, Annex Part A, point 7.1.2.1.4 and Regulation (EU) N° 284/2013, Annex Part A, point 9.1.1.1)

| IN-R9803 | Dark anaerobic conditions. Parent dosed studies with precursor for the f.f.: parent |  |  |  |  |  |  |  |
|----------|-------------------------------------------------------------------------------------|--|--|--|--|--|--|--|
|----------|-------------------------------------------------------------------------------------|--|--|--|--|--|--|--|

7 X This column is reserved for any other property that is considered to have a particular impact on the degradation rate. Column and this footnote may be removed if not used.

| Soil type                            | X <sup>10</sup> | pH <sup>a)</sup> | t. °C / %<br>MWHC | DT <sub>50</sub> / DT <sub>90</sub><br>(d) | f. f.<br>k <sub>f</sub> /<br>k <sub>dp</sub> | DT <sub>50</sub> (d)<br>20°C <sup>b)</sup> | St.<br>(χ <sup>2</sup> ) | Method of<br>calculation |
|--------------------------------------|-----------------|------------------|-------------------|--------------------------------------------|----------------------------------------------|--------------------------------------------|--------------------------|--------------------------|
| Gross-Umstadt loam                   |                 | 6.1              | 20°C /<br>flooded | 87.0 / 289.1                               | 0.18                                         | -                                          | 10                       | SFO-SFO                  |
| Speyer 3A loam                       |                 | 7.2              | 20°C /<br>flooded | 73.4 / 244                                 | 0.35                                         | -                                          | 10                       | SFO-SFO                  |
| Geometric mean (if not pH dependent) |                 |                  |                   |                                            |                                              | -                                          |                          |                          |
| Arithmetic mean                      |                 |                  |                   |                                            | 0.27                                         |                                            |                          |                          |

a) pH measured in CaCl<sub>2</sub>.

b) Normalised using a Q10 of 2.58.

#### Rate of degradation in soil (anaerobic) laboratory studies transformation products (Regulation (EU) N° 283/2013, Annex Part A, point 7.1.2.1.4 and Regulation (EU) N° 284/2013, Annex Part A, point 9.1.1.1)

| IN-GK521                                                                            |                 |                  |                   |                                            |                                              |                                            |                          |                          |
|-------------------------------------------------------------------------------------|-----------------|------------------|-------------------|--------------------------------------------|----------------------------------------------|--------------------------------------------|--------------------------|--------------------------|
| Dark anaerobic conditions. Parent dosed studies with precursor for the f.f.: parent |                 |                  |                   |                                            |                                              |                                            |                          |                          |
| Soil type                                                                           | X <sup>10</sup> | pH <sup>a)</sup> | t. °C / %<br>MWHC | DT <sub>50</sub> / DT <sub>90</sub><br>(d) | f. f.<br>k <sub>f</sub> /<br>k <sub>dp</sub> | DT <sub>50</sub> (d)<br>20°C <sup>b)</sup> | St.<br>(χ <sup>2</sup> ) | Method of<br>calculation |
| Speyer 3A loam                                                                      |                 | 7.2              | 20°C /<br>flooded | 67.1 / 223                                 | 0.23                                         | -                                          | 10                       | SFO-SFO                  |
| Geometric mean (if not pH dependent)                                                |                 |                  |                   |                                            |                                              | -                                          |                          |                          |
| Arithmetic mean                                                                     |                 |                  |                   |                                            | 0.23                                         |                                            |                          |                          |

a) pH measured in CaCl<sub>2</sub>.

b) Normalised using a Q10 of 2.58.

#### Rate of degradation on soil (photolysis) laboratory active substance (Regulation (EU) N° 283/2013, Annex Part A, point 7.1.1.3)

| Parent                  | Soil photolysis |                                 |                                 |                                                                       |                          |                       |
|-------------------------|-----------------|---------------------------------|---------------------------------|-----------------------------------------------------------------------|--------------------------|-----------------------|
| Soil type               | X <sup>8</sup>  | pH <sup>a)</sup>                | t. °C / % MWHC                  | DT <sub>50</sub> / DT <sub>90</sub> (d) calculated<br>at 39°N to 50°N | St.<br>(χ <sup>2</sup> ) | Method of calculation |
| Gardena silt loam       |                 | 7.5<br>(media<br>not<br>stated) | 25°C / not stated               | 2.9 / - <sup>b</sup>                                                  | R <sup>2</sup> =<br>0.99 | SFO                   |
| Nambsheim sandy<br>loam |                 | 7.5<br>(water)                  | 19-20°C / 75%<br>MWHC (1/3 bar) | 17.2 / 56.8                                                           | R <sup>2</sup> =<br>0.99 | SFO                   |
| Fisilis silt loam       |                 | 7.5<br>(CaCl <sub>2</sub> )     | 20°C / 70% FC<br>(pF2)          | 17.8 / - <sup>b</sup>                                                 | 5                        | SFO                   |

a) Measured in [medium to be stated, usually calcium chloride solution or water].

b) DT<sub>90</sub> not reported.

<sup>8</sup> X This column is reserved for any other property that is considered to have a particular impact on the degradation rate. Column and this footnote may be removed if not used.

**Soil adsorption active substance (Regulation (EU) N° 283/2013, Annex Part A, point 7.1.3.1.1 and Regulation (EU) N° 284/2013, Annex Part A, point 9.1.2.1)**

| Parent (tribenuron-methyl)                                                                                     |      |                       |                          |                            |                          |                            |      |
|----------------------------------------------------------------------------------------------------------------|------|-----------------------|--------------------------|----------------------------|--------------------------|----------------------------|------|
| Soil Type                                                                                                      | OC % | Soil pH <sup>a)</sup> | K <sub>d</sub><br>(mL/g) | K <sub>doc</sub><br>(mL/g) | K <sub>F</sub><br>(mL/g) | K <sub>Foc</sub><br>(mL/g) | 1/n  |
| LRA A0, Sandy loam                                                                                             | 1.51 | 5.4                   |                          |                            | 0.98                     | 65.3                       | 0.99 |
| LR AD, Silty clay                                                                                              | 2.61 | 5.7                   |                          |                            | 0.63                     | 24.2                       | 0.99 |
| Tama, Loam                                                                                                     | 1.91 | 5.4                   |                          |                            | 1.12                     | 58.9                       | 1.11 |
| Lleida, Silty clay                                                                                             | 1.1  | 7.7                   |                          |                            | 0.05                     | 4.55                       | 0.92 |
| Nambsheim, Sandy loam                                                                                          | 1.45 | 7.3                   |                          |                            | 0.12                     | 8                          | 0.99 |
| Gross-Umstadt, Silt loam                                                                                       | 1.2  | 7.7                   |                          |                            | 0.1                      | 9.8                        | 0.99 |
| Arrow, Sandy loam                                                                                              | 2.3  | 5.7                   |                          |                            | 1.7                      | 73.7                       | 0.9  |
| Mattapex, Silt loam                                                                                            | 2.6  | 6.4                   |                          |                            | 0.3                      | 11.3                       | 0.99 |
| Matapeake, Loam                                                                                                | 1.7  | 6.5                   |                          |                            | 0.8                      | 44.6                       | 0.92 |
| Nambsheim, Sandy loam                                                                                          | 0.7  | 8.2                   |                          |                            | 0.1                      | 15.1                       | 1.08 |
| Geometric mean (if not pH dependent) **                                                                        |      |                       |                          |                            | -                        | (21.3)                     | -    |
| Arithmetic mean (if not pH dependent)                                                                          |      |                       |                          |                            | -                        | (31.6)                     | 0.99 |
| pH dependence, Yes or No                                                                                       |      |                       | Yes                      |                            |                          |                            |      |
| Arithmetic mean for pH < 7 => K <sub>F,OC</sub> = 46.3 (20.7–72.0)** l/kgoc , 1/n = 0.98 (0.91–1.06)** (n = 6) |      |                       |                          |                            |                          |                            |      |
| Geometric mean for pH < 7 => K <sub>F,OC</sub> = 38.9 (36.7–41.0)* l/kgoc (n = 6)                              |      |                       |                          |                            |                          |                            |      |
| Arithmetic mean for pH > 7 => K <sub>F,OC</sub> = 9.36 (2.36–16.4)** l/kgoc , 1/n = 1.00 (0.89–1.10)** (n = 4) |      |                       |                          |                            |                          |                            |      |
| Geometric mean for pH > 7 => K <sub>F,OC</sub> = 8.6 (6.4–10.8)* l/kgoc (n = 4)                                |      |                       |                          |                            |                          |                            |      |

a) All 10 soil pH-values were measured in calcium chloride 0.01 M with a soil:solution ratio 1:1 or 1:2.

\* Only relevant after implementation of the published EFSA guidance.

\*\* Ranges in paranthesis is the 95% confidence interval (from Excel Add In Analysis ToolPak)

**Soil adsorption transformation products (Regulation (EU) N° 283/2013, Annex Part A, point 7.1.3.1.2 and Regulation (EU) N° 284/2013, Annex Part A, point 9.1.2.1)**

| Metabolite M2                          |      |                       |                          |                            |                          |                            |      |
|----------------------------------------|------|-----------------------|--------------------------|----------------------------|--------------------------|----------------------------|------|
| Soil Type                              | OC % | Soil pH <sup>a)</sup> | K <sub>d</sub><br>(mL/g) | K <sub>doc</sub><br>(mL/g) | K <sub>F</sub><br>(mL/g) | K <sub>Foc</sub><br>(mL/g) | 1/n  |
| LRA J3, Clay loam                      | 1.8  | 7.5                   |                          |                            | 1.74                     | 96.5                       | 0.85 |
| Fislis, Silty clay loam                | 2.2  | 6.1                   |                          |                            | 2.18                     | 98.9                       | 0.88 |
| Speyer 2.2 **                          | 1.6  | 5.5                   | -                        | -                          | 0.637                    | 39.5                       | 0.84 |
| Geometric mean (if not pH dependent) * |      |                       |                          |                            | -                        | 72.2                       | -    |
| Arithmetic mean (if not pH dependent)  |      |                       |                          |                            | -                        | 78.3                       | 0.86 |
| pH dependence, Yes or No               |      |                       | No<br>(only two samples) |                            |                          |                            |      |

a) Measured in 0.01 M calcium chloride solution, soil: solution ratio was not stated (for pH).

\* Only relevant after implementation of the published EFSA guidance.

\*\* will depend on outcome of Evaluation Table (Data Requirement 4.6 + Data Requirement 4.9) and the corresponding Reporting Table points 4(81) + 4(110).

**Soil adsorption transformation products (Regulation (EU) N° 283/2013, Annex Part A, point 7.1.3.1.2 and Regulation (EU) N° 284/2013, Annex Part A, point 9.1.2.1)**

| Metabolite Saccharin (IN-00581)        |      |                       |                          |                            |                          |                            |        |
|----------------------------------------|------|-----------------------|--------------------------|----------------------------|--------------------------|----------------------------|--------|
| Soil Type                              | OC % | Soil pH <sup>a)</sup> | K <sub>d</sub><br>(mL/g) | K <sub>doc</sub><br>(mL/g) | K <sub>F</sub><br>(mL/g) | K <sub>Foc</sub><br>(mL/g) | 1/n    |
| Gross- Umstadt, Silt loam              | 1.2  | 7.7 f                 |                          |                            | 0.2                      | 20.2                       | 0.94   |
| Arrow, Sandy loam                      | 2.3  | 5.7 f                 |                          |                            | 0.3                      | 14.2                       | 0.88   |
| Mattapex, Silt loam                    | 2.6  | 6.4 f                 |                          |                            | 0.3                      | 11.7                       | 0.94   |
| 2.2, Loamy sand                        | 1.97 | 5.4 a                 | 0.09-c                   | 4.4 c                      | na                       | na                         | na     |
| 3A, Sandy loam                         | 2.42 | 7.3 a                 | 0.04-c                   | 1.5 c                      | na                       | na                         | na     |
| 6S, Clay loam                          | 1.84 | 6.9 a                 | 0.06 c                   | 3 c                        | na                       | na                         | na     |
| BBA 2.2 loamy sand e                   | 2.5  | 6.1 b                 |                          |                            | 0.13 d                   | 5.2 d                      | 0.95 d |
| Höfchen silt e                         | 2.7  | 7.8 b                 |                          |                            | 0.12 d                   | 4.6 d                      | 0.94 d |
| Laacherhof silt loam e                 | 0.86 | 8.1 b                 |                          |                            | 0.044 d                  | 5.2 d                      | 0.97 d |
| Ephrata loamy sand e                   | 0.37 | 6.8 b                 |                          |                            | 0.025 d                  | 6.7 d                      | 0.95 d |
| Stilwell silty clay e                  | 1.6  | 6.7 b                 |                          |                            | 0.25 d                   | 15.5 d                     | 0.92 d |
| Speyer 2.1 sand e                      | 0.56 | 6 f                   |                          |                            | 0.01                     | 1.8                        | 0.92   |
| Soil 115 clay loam e                   | 1.7  | 7.4 f                 |                          |                            | 0.038                    | 2.2                        | 0.71   |
| Soil 164 silt loam e                   | 3    | 6.5 f                 |                          |                            | 0.125                    | 4.2                        | 0.93   |
| Soil 243 sandy loam e                  | 1.1  | 4.3 f                 |                          |                            | 0.0445                   | 4                          | 1.01   |
| Maryland clay e                        | -    | -                     |                          |                            | -                        | 3                          | 0.94   |
| Maryland sandy loam e                  | -    | -                     |                          |                            | -                        | 3                          | 1.05   |
| California loam e                      | -    | -                     |                          |                            | -                        | 6                          | 0.53   |
| Geometric mean (if not pH dependent) * |      |                       |                          |                            |                          | 5.6                        | -      |
| Arithmetic mean (if not pH dependent)  |      |                       |                          |                            |                          | 7.2                        | 0.90   |
| pH dependence, Yes or No               |      |                       | No                       |                            |                          |                            |        |

a) Measured in [medium to be stated, usually calcium chloride solution or water].

b) Measured in H<sub>2</sub>O.

c) at 19–20 mg/l.

d) Results for all soils are considered uncertain/highly uncertain (low adsorption; product [K<sub>d</sub> x (soil:solution ratio)] <0.3).

e) Results from other dossiers, refer to EFSA conclusions on the peer review of the active substance metsulfuron-methyl (EFSA, 2015), propoxycarbazone (EFSA, 2016) and oxasulfuron (EFSA, in progress).

f) Medium not stated.

na not analysed for isotherm (only Tier 1 & 2).

\* Only relevant after implementation of the published EFSA guidance.



**Soil adsorption transformation products (Regulation (EU) N° 283/2013, Annex Part A, point 7.1.3.1.2 and Regulation (EU) N° 284/2013, Annex Part A, point 9.1.2.1)**

| Metabolite IN-A4098 (a.k.a. AE F059411, CGA150829, triazine amine, 2-amino-4-methoxy-6-methyl-triazin, 4-methoxy-6-methyl-1,3,5-triazin-2-amine, BCS-CN85650) |      |         |                                                                                                       |                            |                          |                            |       |
|---------------------------------------------------------------------------------------------------------------------------------------------------------------|------|---------|-------------------------------------------------------------------------------------------------------|----------------------------|--------------------------|----------------------------|-------|
| Soil Type                                                                                                                                                     | OC % | Soil pH | K <sub>d</sub><br>(mL/g)                                                                              | K <sub>doc</sub><br>(mL/g) | K <sub>F</sub><br>(mL/g) | K <sub>Foc</sub><br>(mL/g) | 1/n   |
| Gross- Umstadt, Silt loam                                                                                                                                     | 1.2  | 7.7 c   |                                                                                                       |                            | 0.225                    | 18.8                       | 1.05  |
| Arrow, Sandy loam                                                                                                                                             | 2.3  | 5.7 c   |                                                                                                       |                            | 0.682                    | 29.7                       | 0.94  |
| Mattapex, Silt loam                                                                                                                                           | 2.6  | 6.4 c   |                                                                                                       |                            | 0.433                    | 16.7                       | 0.96  |
| SL S, silt loam                                                                                                                                               | 2.1  | 7.0 a   |                                                                                                       |                            | 0.443                    | 21.3                       | 0.87  |
| LS 2.2, loamy sand                                                                                                                                            | 2.0  | 6.0 a   |                                                                                                       |                            | 0.298                    | 15.3                       | 0.91  |
| SL V , sandy loam                                                                                                                                             | 0.4  | 6.0 a   |                                                                                                       |                            | 0.315                    | 73.3                       | 0.84  |
| 3A, Silty Sand                                                                                                                                                | 2.42 | 7.3 a   |                                                                                                       |                            | 0.435                    | 17.97                      | 0.76  |
| 6S, Sandy Loam                                                                                                                                                | 1.84 | 6.9 a   |                                                                                                       |                            | 0.0543                   | 2.951                      | 1.42  |
| 2.2, Clay Loam                                                                                                                                                | 1.97 | 5.4 a   |                                                                                                       |                            | 0.3728                   | 18.92                      | 0.64  |
| Myaka, sandy soil                                                                                                                                             | 0.58 | 6.2 a   |                                                                                                       |                            | 0.264                    | 46                         | 0.87  |
| Sassafras, sandy loam                                                                                                                                         | 0.46 | 6.3 a   |                                                                                                       |                            | 0.621                    | 134                        | 0.78  |
| Matapeake, silt loam                                                                                                                                          | 1.1  | 5.3 a   |                                                                                                       |                            | 2.36                     | 214                        | 0.84  |
| Drummer, silty clay loam                                                                                                                                      | 3    | 5.7 a   |                                                                                                       |                            | 6.8                      | 226                        | 0.84  |
| Laacher Hof Wurmweise, loam                                                                                                                                   | 1.8  | 5.3 b   |                                                                                                       |                            | 1.321                    | 73.4                       | 0.92  |
| Hoefchen Am Hohenseh 4a, silt loam                                                                                                                            | 2.4  | 6.6 b   |                                                                                                       |                            | 0.481                    | 20.0                       | 0.98  |
| Les Cayades, clay loam                                                                                                                                        | 0.9  | 7.6 b   |                                                                                                       |                            | 0.561                    | 62.3                       | 0.92  |
| Guadalupe, sandy loam                                                                                                                                         | 0.7  | 6.7 b   |                                                                                                       |                            | 0.675                    | 96.5                       | 0.95  |
| Springfield, silt loam                                                                                                                                        | 1.7  | 6.6 b   |                                                                                                       |                            | 3.147                    | 185.1                      | 0.90  |
| Honville loamy silt d                                                                                                                                         | 0.9  | 6.7 a   |                                                                                                       |                            | 1.57                     | 172.0                      | 0.84  |
| Speyer 2.1 d                                                                                                                                                  | 0.56 | 6.0 e   |                                                                                                       |                            | 0.2025                   | 36                         | 0.92  |
| Standard soil no. 115 d                                                                                                                                       | 1.7  | 7.4 e   |                                                                                                       |                            | 0.6255                   | 37                         | 0.89  |
| Standard soil no. 164 d                                                                                                                                       | 3    | 6.5 e   |                                                                                                       |                            | 0.645                    | 22                         | 0.92  |
| Standard soil no. 243 d                                                                                                                                       | 1.1  | 4.3 e   |                                                                                                       |                            | 0.337                    | 31                         | 0.91  |
| Agricultural sand §                                                                                                                                           | 0.35 | 7.9 a   |                                                                                                       |                            | 0.2326                   | 66.5                       | 0.87  |
| Sandy Loam §                                                                                                                                                  | 0.99 | 7.8 a   |                                                                                                       |                            | 0.57                     | 58.2                       | 0.902 |
| Silt Loam §                                                                                                                                                   | 1.7  | 6.5 a   |                                                                                                       |                            | 0.9612                   | 55.2                       | 0.85  |
| Silty Clay Loam §                                                                                                                                             | 0.70 | 6.9 a   |                                                                                                       |                            | 1.2010                   | 171.6                      | 0.82  |
| Geometric mean (if not pH dependent) *, N = 27                                                                                                                |      |         |                                                                                                       |                            | -                        | 45.6                       | -     |
| Arithmetic mean (if not pH dependent), N = 27                                                                                                                 |      |         |                                                                                                       |                            | -                        | 71.1                       | 0.90  |
| Median (since N > 9)                                                                                                                                          |      |         |                                                                                                       |                            |                          | 46                         | -     |
| pH dependence, Yes or No                                                                                                                                      |      |         | No<br>(no correlation of K <sub>F,OC</sub> versus pH, neither for<br>log K <sub>F,OC</sub> versus pH) |                            |                          |                            |       |

a) Solution in which pH was measured is not stated.

b) Measured in CaCl<sub>2</sub>.

c) Reported as "pH in H<sub>2</sub>O".

\* Only relevant after implementation of the published EFSA guidance.

§ Kesterson (1990) study (values agreed in the EFSA Conclusion on iodosulfuron-methyl-sodium)

**Soil adsorption transformation products (Regulation (EU) N° 283/2013, Annex Part A, point 7.1.3.1.2 and Regulation (EU) N° 284/2013, Annex Part A, point 9.1.2.1)**

| Metabolite IN-D5119                    |      |         |                       |                         |                       |                         |      |
|----------------------------------------|------|---------|-----------------------|-------------------------|-----------------------|-------------------------|------|
| Soil Type                              | OC % | Soil pH | K <sub>d</sub> (mL/g) | K <sub>doc</sub> (mL/g) | K <sub>F</sub> (mL/g) | K <sub>Foc</sub> (mL/g) | 1/n  |
| Drummer, Clay Loam                     | 2.9  | 6.4 a   |                       |                         | 0.19                  | 7                       | 0.96 |
| Porterville, Loam                      | 0.5  | 8.2 a   |                       |                         | 0.02                  | 4                       | 0.84 |
| Nambsheim, Sandy Loam                  | 1.4  | 7.7 a   |                       |                         | 0.04                  | 3                       | 1.00 |
| Lleida, Silty Clay                     | 1.8  | 7.6 a   |                       |                         | 0.04                  | 2                       | 0.83 |
| Sassafras #16, Sandy Loam              | 1.2  | 5.7 a   |                       |                         | 0.09                  | 8                       | 0.99 |
| Soil 2.2, Loamy sand                   | 1.97 | 5.4 b   | 0.056                 | 3.6                     | -                     | -                       | -    |
| LUFA Speyer 2.2 loamy sand             | 1.87 | 5.5 b   |                       |                         |                       | 3                       | 1.01 |
| LUFA Speyer 2.3 sandy loam             | 0.94 | 6.8 b   |                       |                         |                       | 3                       | 1.02 |
| LUFA Speyer 6S clay                    | 1.64 | 7.1 b   |                       |                         |                       | 3                       | 0.96 |
| Geometric mean (if not pH dependent) * |      |         |                       |                         |                       | 3.5                     | -    |
| Arithmetic mean (if not pH dependent)  |      |         |                       |                         |                       | 4.0                     | 0.92 |
| pH dependence, Yes or No               |      |         | No                    |                         |                       |                         |      |

a) Measured in 0.01 M CaCl and soil:solution ratio 1:2.

b) Solution composition is not stated.

\* Only relevant after implementation of the published EFSA guidance.

**Soil adsorption transformation products (Regulation (EU) N° 283/2013, Annex Part A, point 7.1.3.1.2 and Regulation (EU) N° 284/2013, Annex Part A, point 9.1.2.1)**

| Metabolite IN-D5803                    |      |                       |                       |                                                   |                       |                         |      |
|----------------------------------------|------|-----------------------|-----------------------|---------------------------------------------------|-----------------------|-------------------------|------|
| Soil Type                              | OC % | Soil pH <sup>a)</sup> | K <sub>d</sub> (mL/g) | K <sub>doc</sub> (mL/g)                           | K <sub>F</sub> (mL/g) | K <sub>Foc</sub> (mL/g) | 1/n  |
| Soil 2.2, Loamy sand                   | 1.97 | 5.4 a                 | 0.29 c                | 14.7 c                                            | -                     | -                       | -    |
| Soil 3A, Sandy loam                    | 2.42 | 7.3 a                 | 0.54 d                | 22.3 d                                            | -                     | -                       | -    |
| Soil 6S, Clay loam                     | 1.84 | 6.9 a                 | 0.70 d                | 37.8 d                                            | -                     | -                       | -    |
| Drummer, Clay Loam                     | 2.9  | 6.4 b                 |                       |                                                   | 1.25                  | 43.2                    | 0.92 |
| Porterville, Loam                      | 0.5  | 8.2 b                 |                       |                                                   | 0.05                  | 11.0                    | 0.86 |
| Nambsheim, Sandy Loam                  | 1.4  | 7.7 b                 |                       |                                                   | 0.11                  | 7.58                    | 0.84 |
| Lleida, Silty Clay                     | 1.8  | 7.6 b                 |                       |                                                   | 0.33                  | 18.5                    | 0.98 |
| Sassafras #16, Sandy Loam              | 1.2  | 5.7 b                 |                       |                                                   | 0.28                  | 23.7                    | 0.95 |
| Geometric mean (if not pH dependent) * |      |                       |                       |                                                   |                       | -                       | 17.7 |
| Arithmetic mean (if not pH dependent)  |      |                       |                       |                                                   |                       | -                       | 21.0 |
| pH dependence, Yes or No               |      |                       |                       | No<br>( $p > 0.05$ for correlations investigated) |                       |                         |      |

a) Solution composition not stated.

b) In 0.01 M CaCl<sub>2</sub>.

c) at 15 mg/l.

d) at 8 mg/l.

\* Only relevant after implementation of the published EFSA guidance.

**Soil adsorption transformation products (Regulation (EU) N° 283/2013, Annex Part A, point 7.1.3.1.2 and Regulation (EU) N° 284/2013, Annex Part A, point 9.1.2.1)**

| Metabolite IN-GK521                    |      |         |                                                                       |                                      |                       |                                     |      |
|----------------------------------------|------|---------|-----------------------------------------------------------------------|--------------------------------------|-----------------------|-------------------------------------|------|
| Soil Type                              | OC % | Soil pH | K <sub>d</sub> (mL/g)                                                 | K <sub>d</sub> <sub>doc</sub> (mL/g) | K <sub>F</sub> (mL/g) | K <sub>F</sub> <sub>oc</sub> (mL/g) | 1/n  |
| Gross-Umstadt, loam                    | 1.04 | 7.4 a   |                                                                       |                                      | 0.277                 | 27.7                                | 1.02 |
| Lleida, Silty Clay                     | 1.86 | 8 a     |                                                                       |                                      | 0.238                 | 12.5                                | 1.00 |
| Tama, Silty clay loam                  | 1.97 | 6.2 a   |                                                                       |                                      | 0.298                 | 14.9                                | 1.01 |
| Nambsheim, Sandy loam                  | 1.28 | 7.8 a   |                                                                       |                                      | 0.222                 | 17.1                                | 1.05 |
| Sassafras, Loamy sand                  | 0.75 | 5 a     |                                                                       |                                      | 0.12                  | 15.0                                | 1.05 |
| LRA J3, Clay loam                      | 1.8  | 7.5 a   | 0.24 b                                                                | 14 b                                 | -                     | -                                   | -    |
| Geometric mean (if not pH dependent) * |      |         |                                                                       |                                      | -                     | 16.8                                | -    |
| Arithmetic mean (if not pH dependent)  |      |         |                                                                       |                                      | -                     | 17.4                                | 1.03 |
| pH dependence, Yes or No               |      |         | No<br>(no linear correlation found; U-curve not further investigated) |                                      |                       |                                     |      |

a) In 0.01 M calcium chloride and soil:solution ratio 1:1.

b) At 0.6–1 mg/l.

\* Only relevant after implementation of the published EFSA guidance.

**Soil adsorption transformation products (Regulation (EU) N° 283/2013, Annex Part A, point 7.1.3.1.2 and Regulation (EU) N° 284/2013, Annex Part A, point 9.1.2.1)**

| Metabolite IN-GN815                    |      |                       |                                                   |                                      |                       |                                     |      |
|----------------------------------------|------|-----------------------|---------------------------------------------------|--------------------------------------|-----------------------|-------------------------------------|------|
| Soil Type                              | OC % | Soil pH <sup>a)</sup> | K <sub>d</sub> (mL/g)                             | K <sub>d</sub> <sub>doc</sub> (mL/g) | K <sub>F</sub> (mL/g) | K <sub>F</sub> <sub>oc</sub> (mL/g) | 1/n  |
| Gross-Umstadt, Loam                    | 1.04 | 7.4                   |                                                   |                                      | 0.189                 | 18.9                                | 1.01 |
| Lleida, Clay                           | 1.97 | 7.7                   |                                                   |                                      | 0.222                 | 11.1                                | 1.00 |
| Tama, Silty clay loam                  | 2.49 | 6                     |                                                   |                                      | 0.332                 | 13.3                                | 1.00 |
| Nambsheim, Sandy loam                  | 1.39 | 7.7                   |                                                   |                                      | 0.468                 | 33.4                                | 0.98 |
| Sassafras, Loamy sand                  | 1.21 | 5.4                   |                                                   |                                      | 0.131                 | 10.9                                | 0.99 |
| Geometric mean (if not pH dependent) * |      |                       |                                                   |                                      | -                     | 15.9                                | -    |
| Arithmetic mean (if not pH dependent)  |      |                       |                                                   |                                      | -                     | 17.5                                | 1.00 |
| pH dependence, Yes or No               |      |                       | No<br>( $p > 0.05$ for correlations investigated) |                                      |                       |                                     |      |

a) Measured in 0.01 calcium chloride solution, and soil:solution ratio 1:1.

\* Only relevant after implementation of the published EFSA guidance.

**Soil adsorption transformation products (Regulation (EU) N° 283/2013, Annex Part A, point 7.1.3.1.2 and Regulation (EU) N° 284/2013, Annex Part A, point 9.1.2.1)**

| Metabolite IN-L5296                    |      |                       |                       |                                      |                       |                                     |      |
|----------------------------------------|------|-----------------------|-----------------------|--------------------------------------|-----------------------|-------------------------------------|------|
| Soil Type                              | OC % | Soil pH <sup>a)</sup> | K <sub>d</sub> (mL/g) | K <sub>d</sub> <sub>doc</sub> (mL/g) | K <sub>F</sub> (mL/g) | K <sub>F</sub> <sub>oc</sub> (mL/g) | 1/n  |
| Gross- Umstadt, Silt loam              | 1.2  | 7.7                   |                       |                                      | 0.929                 | 77.4                                | 0.72 |
| Arrow, Sandy loam                      | 2.3  | 5.7                   |                       |                                      | 3.18                  | 138                                 | 0.82 |
| Mattapex, Silt loam                    | 2.6  | 6.4                   |                       |                                      | 1.37                  | 52.7                                | 0.89 |
| Geometric mean (if not pH dependent) * |      |                       |                       |                                      | -                     | 82.6                                | -    |
| Arithmetic mean (if not pH dependent)  |      |                       |                       |                                      | -                     | 89.4                                | 0.80 |
| pH dependence, Yes or No               |      |                       | No                    |                                      |                       |                                     |      |

a) reported as “pH water”.

\* Only relevant after implementation of the published EFSA guidance.

**Soil adsorption transformation products (Regulation (EU) N° 283/2013, Annex Part A, point 7.1.3.1.2 and Regulation (EU) N° 284/2013, Annex Part A, point 9.1.2.1)**

| Metabolite IN-R9803                    |      |                       |                          |                            |                          |                            |      |
|----------------------------------------|------|-----------------------|--------------------------|----------------------------|--------------------------|----------------------------|------|
| Soil Type                              | OC % | Soil pH <sup>a)</sup> | K <sub>d</sub><br>(mL/g) | K <sub>doc</sub><br>(mL/g) | K <sub>F</sub><br>(mL/g) | K <sub>Foc</sub><br>(mL/g) | 1/n  |
| Speyer 2.2, Sandy loam                 | 1.6  | 5.4                   |                          |                            | 0.315                    | 19.7                       | 1.04 |
| Lleida, Silty Clay                     | 1.9  | 7.7                   |                          |                            | 0.943                    | 49.6                       | 0.98 |
| Tama, Silty clay loam                  | 2.3  | 6.2                   |                          |                            | 0.724                    | 31.5                       | 1.00 |
| Nambsheim, Sandy loam                  | 1.6  | 7.6                   |                          |                            | 0.963                    | 60.2                       | 0.98 |
| Cajon, loam                            | 0.7  | 7.6                   |                          |                            | 1.25                     | 178.6                      | 1.07 |
| Geometric mean (if not pH dependent) * |      |                       |                          |                            | -                        | 50.6                       | -    |
| Arithmetic mean (if not pH dependent)  |      |                       |                          |                            | -                        | 67.9                       | 1.00 |
| pH dependence, Yes or No               |      |                       | No<br>( $p > 0.05$ )     |                            |                          |                            |      |

a) Measured in 0.01 M calcium chloride solution, and soil:solution ratio 1:1.

\* Only relevant after implementation of the published EFSA guidance.

**Soil adsorption transformation products (Regulation (EU) N° 283/2013, Annex Part A, point 7.1.3.1.2 and Regulation (EU) N° 284/2013, Annex Part A, point 9.1.2.1)**

| Metabolite IN-R9805                    |      |                       |                                                                                               |                            |                          |                            |      |
|----------------------------------------|------|-----------------------|-----------------------------------------------------------------------------------------------|----------------------------|--------------------------|----------------------------|------|
| Soil Type                              | OC % | Soil pH <sup>a)</sup> | K <sub>d</sub><br>(mL/g)                                                                      | K <sub>doc</sub><br>(mL/g) | K <sub>F</sub><br>(mL/g) | K <sub>Foc</sub><br>(mL/g) | 1/n  |
| Nambsheim, Sandy loam                  | 1.5  | 7.8                   |                                                                                               |                            | 0.30                     | 20                         | 0.95 |
| Tama, Silty clay loam                  | 1.1  | 6.2                   |                                                                                               |                            | 16.6                     | 1509                       | 0.93 |
| Porterville, Loam                      | 0.46 | 8.0                   |                                                                                               |                            | 0.49                     | 107                        | 0.95 |
| Gross-Umstadt, Loam                    | 1.2  | 6.6                   |                                                                                               |                            | 0.45                     | 37.5                       | 0.91 |
| LRA-D, Sandy loam                      | 3.0  | 5.6                   |                                                                                               |                            | 0.49                     | 16.3                       | 0.96 |
| Geometric mean (if not pH dependent) * |      |                       |                                                                                               |                            | -                        | 72.3                       | -    |
| Arithmetic mean (if not pH dependent)  |      |                       |                                                                                               |                            | -                        | 338                        | 0.94 |
| pH dependence, Yes or No               |      |                       | No<br>(no linear correlations, but possibly an inverted-U relation; not further investigated) |                            |                          |                            |      |

a) Measured in 0.01 M calcium chloride solution, and soil:solution ratio 1:1.

\* Only relevant after implementation of the published EFSA guidance.

**Mobility in soil column leaching active substance (Regulation (EU) N° 283/2013, Annex Part A, point 7.1.4.1.1 and Regulation (EU) N° 284/2013, Annex Part A, point 9.1.2.1)**

Column leaching

Not available, not requested

--

**Mobility in soil column leaching transformation products (Regulation (EU) N° 283/2013, Annex Part A, point 7.1.4.1.2 and Regulation (EU) N° 284/2013, Annex Part A, point 9.1.2.1)**

Column leaching

Not available, not requested

--

**Lysimeter / field leaching studies (Regulation (EU) N° 283/2013, Annex Part A, points 7.1.4.2 / 7.1.4.3 and Regulation (EU) N° 284/2013, Annex Part A, points 9.1.2.2 / 9.1.2.3)**

Lysimeter/ field leaching studies

Location: Germany  
 Study type: lysimeter  
 Soil properties: clayey silt loam, pH = 6.5-6.9, OC= , ≤1.1%  
 Dates of application : 18 May 1999, end of study 8<sup>th</sup> November 2000  
 Crop : Non-cropped conditions  
 Number of applications: 1  
 Application rate: 37-40 g/as/ha  
 Average annual rainfall (mm): total 1170 mm, approx. 780 mm/year  
 Average annual leachate volume (mm): total 540 mm, approx. 360 mm/year  
 % radioactivity in leachate (maximum/year): max <0.003% AR (first leachate after two weeks)  
 Amount of radioactivity in the soils at the end of the study = 36%  
 Note that the lysimeter results are only considered as supportive information. The results should not be used for risk assessment.

**Hydrolytic degradation (Regulation (EU) N° 283/2013, Annex Part A, point 7.2.1.1)**

Hydrolytic degradation of the active substance and metabolites &gt; 10 %

|                                                                                                                                                                                                                                                                                                       |
|-------------------------------------------------------------------------------------------------------------------------------------------------------------------------------------------------------------------------------------------------------------------------------------------------------|
| <p>pH 4: DT<sub>50</sub> 0.41 days at 10°C (SFO)<br/>         DT<sub>50</sub> 0.19 days at 15°C (SFO)<br/>         DT<sub>50</sub> 0.10 days at 20°C (SFO)<br/>         DT<sub>50</sub> 0.04 days at 25°C (SFO)</p> <p>IN-00581: 94.6% (0.42 d, 20°C)<br/>         IN-L5296: 90.5% (0.42 d, 20°C)</p> |
| <p>pH 5: DT<sub>50</sub> 0.002 days at 25°C (SFO)</p>                                                                                                                                                                                                                                                 |
| <p>pH 7: DT<sub>50</sub> 63.5 days at 15°C (SFO)<br/>         DT<sub>50</sub> 31.0 days at 20°C (SFO)<br/>         DT<sub>50</sub> 3.3-14.9 days at 25°C (SFO)</p> <p>IN-00581: 80.7% (21 d, 25°C)<br/>         IN-L5296: 78.6% (21 d, 25°C);<br/>         IN-D5803: 7.70% (2.00 d, 25°C)</p>         |
| <p>pH 9: DT<sub>50</sub> 743 days at 20°C (SFO)<br/>         DT<sub>50</sub> 157-220 days at 25°C (SFO)<br/>         DT<sub>50</sub> 266 days at 30°C (SFO)<br/>         DT<sub>50</sub> 41.1 days at 40°C (SFO)</p> <p>IN-00581: 9.3% (30.0 d, 25°C)<br/>         IN-L5296: 9.6% (30.0 d, 25°C)</p>  |

**Aqueous photochemical degradation (Regulation (EU) N° 283/2013, Annex Part A, points 7.2.1.2 / 7.2.1.3)**

Photolytic degradation of active substance and metabolites above 10 %

|                                                                                                                                                                                                                                                     |
|-----------------------------------------------------------------------------------------------------------------------------------------------------------------------------------------------------------------------------------------------------|
| <p>At pH where hydrolysis is minimized<br/>         DT<sub>50</sub> : 120 days direct photolysis, continuous irradiation (25°C, pH 9)<br/>         Estimated DT<sub>50</sub> at 40°N approximately 240 days<br/>         No metabolites &gt;10%</p> |
| <p>Natural light, 39°N; DT<sub>50</sub> 167.4 days (25°C, pH 9)</p>                                                                                                                                                                                 |
| <p>Quantum yield of direct phototransformation in water at λ &gt; 290 nm</p>                                                                                                                                                                        |
| <p>not available, not requested</p>                                                                                                                                                                                                                 |

**'Ready biodegradability' (Regulation (EU) N° 283/2013, Annex Part A, point 7.2.2.1)**

Readily biodegradable (yes/no)

|    |
|----|
| No |
|----|

**Aerobic mineralisation in surface water (Regulation (EU) N° 283/2013, Annex Part A, point 7.2.2.2 and Regulation (EU) N° 284/2013, Annex Part A, point 9.2.1)**

| Parent                                                           |                      |                         |                        |                                                                               |                       |                          |                                                            |                       |                          |                          |
|------------------------------------------------------------------|----------------------|-------------------------|------------------------|-------------------------------------------------------------------------------|-----------------------|--------------------------|------------------------------------------------------------|-----------------------|--------------------------|--------------------------|
| System identifier<br>(indicate fresh,<br>estuarine or<br>marine) | pH<br>water<br>phase | pH<br>sed <sup>a)</sup> | t.<br>°C <sup>b)</sup> | DT <sub>50</sub> /DT <sub>90</sub> whole sys.<br>(suspended sediment<br>test) |                       | St.<br>(χ <sup>2</sup> ) | DT <sub>50</sub> /DT <sub>90</sub><br>Water (pelagic test) |                       | St.<br>(χ <sup>2</sup> ) | Method of<br>calculation |
|                                                                  |                      |                         |                        | At study<br>temp                                                              | Normalised<br>to x °C |                          | At<br>study<br>temp                                        | Normalised<br>to x °C |                          |                          |
| pond water                                                       | 8.0                  | -                       | 20                     | -                                                                             | -                     | -                        | 86.2 <sup>c)</sup>                                         | -                     | 3                        | SFO                      |
| river water                                                      | 8.3                  | - <sup>d)</sup>         | 20-<br>24              | 139                                                                           | -                     | 2                        | - <sup>e)</sup>                                            | -                     | -                        | SFO                      |

a) Measured in [medium to be stated, usually calcium chloride solution or water].

b) Temperature of incubation.

c) Based on degradation of parent into transformation products (not full mineralisation).

d) pH of sediment not reported.

e) Due to long lag phase and too few data points no degradation half-life could be calculated.

| Mineralisation and non extractable residues (for parent dosed experiments) |                   |        |                                                                         |                                                                             |                                                                                                   |
|----------------------------------------------------------------------------|-------------------|--------|-------------------------------------------------------------------------|-----------------------------------------------------------------------------|---------------------------------------------------------------------------------------------------|
| System identifier<br>(indicate fresh,<br>estuarine or marine)              | pH water<br>phase | pH sed | Mineralisation<br>x % after n d. (end of<br>the study).                 | Non-extractable residues.<br>max x % after n d<br>(suspended sediment test) | Non-extractable residues. max<br>x % after n d (end of the<br>study) (suspended sediment<br>test) |
| Pond water                                                                 | 8.0               | -      | 28% after 60 d                                                          | --                                                                          | --                                                                                                |
| river water                                                                | 8.3               | -      | 2.2% after 110 days<br>(pelagic)<br>3.8% after 110 days<br>(susp. sed.) | 2.7% after 14 days                                                          | 1.6% after 110 days                                                                               |

**Water / sediment study (Regulation (EU) N° 283/2013, Annex Part A, point 7.2.2.3 and Regulation (EU) N° 284/2013, Annex Part A, point 9.2.2)**

| <b>Parent</b>                        |                | Distribution; mainly distributed to water phase |       |                                               |                       |                                                        |                       |                                                      |                       |                       |
|--------------------------------------|----------------|-------------------------------------------------|-------|-----------------------------------------------|-----------------------|--------------------------------------------------------|-----------------------|------------------------------------------------------|-----------------------|-----------------------|
| Water / sediment system              | pH water phase | pH sed <sup>a)</sup>                            | t. °C | DT <sub>50</sub> /DT <sub>90</sub> whole sys. | St. (χ <sup>2</sup> ) | DT <sub>50</sub> /DT <sub>90</sub> Water <sup>b)</sup> | St. (χ <sup>2</sup> ) | DT <sub>50</sub> /DT <sub>90</sub> sed <sup>c)</sup> | St. (χ <sup>2</sup> ) | Method of calculation |
| Brandywine river                     | 6.8-8.3        | 6.5-7.5                                         | 20    | 26.2/86.9                                     | 7                     | 22.5/74.8                                              | 7                     | 18.8/87.6 <sup>e)</sup>                              | 4                     | SFO (FOMC (sediment)) |
| Lums pond                            | 4.9-7.7        | 4.9-5.4                                         | 20    | 12.6/42.1                                     | 7-19 <sup>d)</sup>    | 10.7/41.1                                              | 8-19 <sup>d)</sup>    | 10.1/33.6                                            | 31-35 <sup>d)</sup>   | SFO                   |
| Geometric mean at 20°C <sup>b)</sup> |                |                                                 |       | <b>18.2</b>                                   |                       | -                                                      |                       | -                                                    |                       | -                     |

a) Measured in water.

b) DisT50/DisT90 in water column

c) DisT50/DisT90 in sediment (decline from peak)

d) Range of χ<sup>2</sup>-error from the fitting of data derived with two different radiolabels.

| Mineralisation and non extractable residues (from parent dosed experiments) |                |                      |                                                                                      |                                                                                                |                                                                                               |
|-----------------------------------------------------------------------------|----------------|----------------------|--------------------------------------------------------------------------------------|------------------------------------------------------------------------------------------------|-----------------------------------------------------------------------------------------------|
| Water / sediment system                                                     | pH water phase | pH sed <sup>a)</sup> | Mineralisation x % after n d. (end of the study).                                    | Non-extractable residues in sed. max x % after n d                                             | Non-extractable residues in sed. max x % after n d (end of the study)                         |
| Brandywine river                                                            | 6.8-8.3        | 6.5-7.5              | 60% (135 d, phenyl(U)- <sup>14</sup> C)<br>18% (135 d, triazine-2- <sup>14</sup> C)  | 26% after 105 d (phenyl(U)- <sup>14</sup> C)<br>16% after 71 d (triazine-2- <sup>14</sup> C)   | 22% after 135 d (phenyl(U)- <sup>14</sup> C)<br>14% after 135 d (triazine-2- <sup>14</sup> C) |
| Lums pond                                                                   | 4.9-7.7        | 4.9-5.4              | 65% (135 d, phenyl(U)- <sup>14</sup> C)<br>1.4% (105 d, triazine-2- <sup>14</sup> C) | 16% after 105 d (phenyl(U)- <sup>14</sup> C)<br>9.3% after 105 d (triazine-2- <sup>14</sup> C) | 15% after 135 d (phenyl(U)- <sup>14</sup> C)<br>--                                            |

a) Measured in water.

| <b>IN-L5296</b>                      |                | Distribution; up to 88.9% (total system, 56 d), max 42% in water (14 d), max 86% in sediment (56 d) |       |                                               |                       |                                          |                       |                                        |                       |                       |
|--------------------------------------|----------------|-----------------------------------------------------------------------------------------------------|-------|-----------------------------------------------|-----------------------|------------------------------------------|-----------------------|----------------------------------------|-----------------------|-----------------------|
| Water / sediment system              | pH water phase | pH sed <sup>a)</sup>                                                                                | t. °C | DT <sub>50</sub> /DT <sub>90</sub> whole sys. | St. (χ <sup>2</sup> ) | DT <sub>50</sub> /DT <sub>90</sub> water | St. (χ <sup>2</sup> ) | DT <sub>50</sub> /DT <sub>90</sub> sed | St. (χ <sup>2</sup> ) | Method of calculation |
| Brandywine river                     | 6.8-8.3        | 6.5-7.5                                                                                             | 20    | 168/558                                       | 10                    | not avail.                               | -                     | not avail.                             | -                     | SFO-SFO               |
| Lums pond                            | 4.9-7.7        | 4.9-5.4                                                                                             | 20    | 309/1026                                      | 10                    | 3.2/33.6 <sup>e)</sup>                   | 7                     | not avail.                             |                       | SFO-SFO               |
| Geometric mean at 20°C <sup>b)</sup> |                |                                                                                                     |       | <b>227.8</b>                                  |                       | -                                        |                       | -                                      |                       | -                     |

a) Measured in water.

b) Normalised using a Q10 of 2.58.

c) Dissipation from water column in Lums pond; FOMC kinetic model.

| <b>IN-00581</b>                      |                | Distribution; up to 38.4% (total system, 14 d), max 32% in water (14 d), max 6.4% in sediment (14 d) |       |                                               |                       |                                          |                       |                                        |                       |                       |
|--------------------------------------|----------------|------------------------------------------------------------------------------------------------------|-------|-----------------------------------------------|-----------------------|------------------------------------------|-----------------------|----------------------------------------|-----------------------|-----------------------|
| Water / sediment system              | pH water phase | pH sed <sup>a)</sup>                                                                                 | t. °C | DT <sub>50</sub> /DT <sub>90</sub> whole sys. | St. (χ <sup>2</sup> ) | DT <sub>50</sub> /DT <sub>90</sub> water | St. (χ <sup>2</sup> ) | DT <sub>50</sub> /DT <sub>90</sub> sed | St. (χ <sup>2</sup> ) | Method of calculation |
| Brandywine river                     | 6.8-8.3        | 6.5-7.5                                                                                              | 20    | not avail.                                    | -                     | not avail.                               | -                     | not avail.                             | -                     |                       |
| Lums pond                            | 4.9-7.7        | 4.9-5.4                                                                                              | 20    | 5/35.8 <sup>c)</sup>                          | 10                    | 2.3/20.5 <sup>c)</sup>                   | 7                     | not avail.                             | -                     | FOMC                  |
| Geometric mean at 20°C <sup>b)</sup> |                |                                                                                                      |       | <b>10.8<sup>d)</sup></b>                      |                       | -                                        |                       | -                                      |                       | -                     |

a) Measured in water.

b) Normalised using a Q10 of 2.58.

c) Decline fit; FOMC kinetic model.



d) Modelling input - FOMC  $DT_{90} / 3.32$ .

| <b>IN-D5119</b>                                                                                      |                |                      |       |                                               |                  |                                          |                  |                                        |                  |                       |
|------------------------------------------------------------------------------------------------------|----------------|----------------------|-------|-----------------------------------------------|------------------|------------------------------------------|------------------|----------------------------------------|------------------|-----------------------|
| Distribution; up to 26.5% (total system, 56 d), max 19% in water (56 d), max 7.5% in sediment (56 d) |                |                      |       |                                               |                  |                                          |                  |                                        |                  |                       |
| Water / sediment system                                                                              | pH water phase | pH sed <sup>a)</sup> | t. °C | DT <sub>50</sub> /DT <sub>90</sub> whole sys. | St. ( $\chi^2$ ) | DT <sub>50</sub> /DT <sub>90</sub> water | St. ( $\chi^2$ ) | DT <sub>50</sub> /DT <sub>90</sub> sed | St. ( $\chi^2$ ) | Method of calculation |
| Brandywine river                                                                                     | 6.8-8.3        | 6.5-7.5              | 20    | not avail.                                    | -                | not avail.                               | -                | 23.3/77.5 <sup>c)</sup>                | 18               | SFO                   |
| Lums pond                                                                                            | 4.9-7.7        | 4.9-5.4              | 20    | not avail.                                    | -                | not avail.                               | -                | not avail.                             | -                | -                     |
| Geometric mean at 20°C <sup>b)</sup>                                                                 |                |                      |       | <b>not avail.</b>                             |                  | -                                        |                  | -                                      |                  | -                     |

a) Measured in water.

b) Normalised using a Q10 of 2.58.

c) Dissipation from sediment in Brandywine river.

| <b>IN-GN815</b>                                                                                     |                |                      |       |                                               |                  |                                          |                  |                                        |                  |                       |
|-----------------------------------------------------------------------------------------------------|----------------|----------------------|-------|-----------------------------------------------|------------------|------------------------------------------|------------------|----------------------------------------|------------------|-----------------------|
| Distribution; up to 13% (total system, 29 d), max 5.7% in water (42 d), max 9.2% in sediment (29 d) |                |                      |       |                                               |                  |                                          |                  |                                        |                  |                       |
| Water / sediment system                                                                             | pH water phase | pH sed <sup>a)</sup> | t. °C | DT <sub>50</sub> /DT <sub>90</sub> whole sys. | St. ( $\chi^2$ ) | DT <sub>50</sub> /DT <sub>90</sub> water | St. ( $\chi^2$ ) | DT <sub>50</sub> /DT <sub>90</sub> sed | St. ( $\chi^2$ ) | Method of calculation |
| Brandywine river                                                                                    | 6.8-8.3        | 6.5-7.5              | 20    | 47.6/158 <sup>c)</sup>                        | 10               | 32.1/107 <sup>c)</sup>                   | 7                | 28.5/94.6 <sup>c)</sup>                | 17               | SFO                   |
| Lums pond                                                                                           | 4.9-7.7        | 4.9-5.4              | 20    | not avail.                                    | -                | not avail.                               | -                | not avail.                             | -                | -                     |
| Geometric mean at 20°C <sup>b)</sup>                                                                |                |                      |       | <b>47.6</b>                                   |                  | -                                        |                  | -                                      |                  | -                     |

a) Measured in water.

b) Normalised using a Q10 of 2.58.

c) Decline fit; SFO kinetic model.

| <b>IN-R9805</b>                                                                                     |                |                      |       |                                               |                  |                                          |                  |                                        |                  |                       |
|-----------------------------------------------------------------------------------------------------|----------------|----------------------|-------|-----------------------------------------------|------------------|------------------------------------------|------------------|----------------------------------------|------------------|-----------------------|
| Distribution; up to 14.7% (total system, 71 d), max 9% in water (71 d), max 5.7% in sediment (71 d) |                |                      |       |                                               |                  |                                          |                  |                                        |                  |                       |
| Water / sediment system                                                                             | pH water phase | pH sed <sup>a)</sup> | t. °C | DT <sub>50</sub> /DT <sub>90</sub> whole sys. | St. ( $\chi^2$ ) | DT <sub>50</sub> /DT <sub>90</sub> water | St. ( $\chi^2$ ) | DT <sub>50</sub> /DT <sub>90</sub> sed | St. ( $\chi^2$ ) | Method of calculation |
| Brandywine river                                                                                    | 6.8-8.3        | 6.5-7.5              | 20    | not avail.                                    | -                | not avail.                               | -                | not avail.                             | -                | -                     |
| Lums pond                                                                                           | 4.9-7.7        | 4.9-5.4              | 20    | not avail.                                    | -                | not avail.                               | -                | not avail.                             | -                | -                     |
| Geometric mean at 20°C <sup>b)</sup>                                                                |                |                      |       | <b>not avail.</b>                             |                  | -                                        |                  | -                                      |                  | -                     |

a) Measured in water.

b) Normalised using a Q10 of 2.58.

**Fate and behaviour in air (Regulation (EU) N° 283/2013, Annex Part A, point 7.3.1)**

|                                            |                                                                                                                                                                                   |
|--------------------------------------------|-----------------------------------------------------------------------------------------------------------------------------------------------------------------------------------|
| Direct photolysis in air                   | Not studied - no data requested                                                                                                                                                   |
| Photochemical oxidative degradation in air | DT <sub>50</sub> of 43.4 hours derived by the Atkinson model (AOPWIN-software version 1.92).<br>OH (12 h) concentration assumed = 1.5 x 10 <sup>6</sup> molecules/cm <sup>3</sup> |
| Volatilisation                             | Not available - not requested                                                                                                                                                     |
| Metabolites                                | Not available - not requested                                                                                                                                                     |

**Residues requiring further assessment (Regulation (EU) N° 283/2013, Annex Part A, point 7.4.1)**

|                                                                                                                                                                           |                                                                                                                                                                                                                                                                                                                                                                                              |
|---------------------------------------------------------------------------------------------------------------------------------------------------------------------------|----------------------------------------------------------------------------------------------------------------------------------------------------------------------------------------------------------------------------------------------------------------------------------------------------------------------------------------------------------------------------------------------|
| Environmental occurring residues requiring further assessment by other disciplines (toxicology and ecotoxicology) and or requiring consideration for groundwater exposure | <p>Soil: Tribenuron-methyl, IN-L5296, IN-00581, M2, IN-A4098, IN-R9805 and IN-GK521</p> <p>Surface water: Tribenuron-methyl, IN-L5296, IN-00581, M2, IN-A4098, IN-R9805, IN-GK521, IN-GN815; and IN-D5119</p> <p>Sediment: Tribenuron-methyl and IN-L5296</p> <p>Ground water: Tribenuron-methyl, IN-L5296, IN-00581, M2, IN-A4098, IN-R9805; and IN-GK521</p> <p>Air: Tribenuron-methyl</p> |
|---------------------------------------------------------------------------------------------------------------------------------------------------------------------------|----------------------------------------------------------------------------------------------------------------------------------------------------------------------------------------------------------------------------------------------------------------------------------------------------------------------------------------------------------------------------------------------|

**Definition of the residue for monitoring (Regulation (EU) N° 283/2013, Annex Part A, point 7.4.2)**

|                              |
|------------------------------|
| See section 5, Ecotoxicology |
|------------------------------|

**Monitoring data, if available (Regulation (EU) N° 283/2013, Annex Part A, point 7.5)**

|                                                     |                                                                                                                                                                                                                                                                                     |
|-----------------------------------------------------|-------------------------------------------------------------------------------------------------------------------------------------------------------------------------------------------------------------------------------------------------------------------------------------|
| Soil (indicate location and type of study)          | Not available, not requested                                                                                                                                                                                                                                                        |
| Surface water (indicate location and type of study) | Not available, not requested                                                                                                                                                                                                                                                        |
| Ground water (indicate location and type of study)  | Data from the French SOeS monitoring program (ADES database) indicate low probability for leaching of tribenuron-methyl to groundwater at levels reaching 0.1 µg/L (i.e. of 44650 analyses between the years 2003-2016 only 6 had quantifiable residues and those were <0.05 µg/L). |
| Air (indicate location and type of study)           | Not available, not requested                                                                                                                                                                                                                                                        |

**PEC soil (Regulation (EU) N° 284/2013, Annex Part A, points 9.1.3 / 9.3.1)**

Tribenuron-methyl in DPX-L5300  
Method of calculation

DT<sub>50</sub> (d): 37.4 days (from lab data no longer considered acceptable; correct value should be 34.7 days from field dissipation study however since a worst case value was used this is acceptable)  
Kinetics: SFO  
representative non-normalised from field studies

Application data

Crop: Sunflower  
Depth of soil layer: 5cm or 20cm  
Soil bulk density: 1.5g/cm<sup>3</sup>  
% plant interception: Post-emergence at BBCH 12-18 so no crop interception assumed.  
Number of applications: 1  
Interval (d): not applicable  
Application rate(s): 30 g a.s./ha

PEC(s)  
(mg/kg)

|                               | Single application<br>Actual | Single application<br>Time weighted average | Multiple application<br>Actual | Multiple application<br>Time weighted average |
|-------------------------------|------------------------------|---------------------------------------------|--------------------------------|-----------------------------------------------|
| Initial Plateau concentration | 0.040                        |                                             | Not applicable                 |                                               |
|                               | Not required                 |                                             |                                |                                               |

Metabolites

IN-L5296

IN-A4098

IN-00581

IN-D5803

IN-R9805

M2

Method of calculation

Molecular weight relative to the parent (=1):

IN-L5296: 0.390

IN-A4098: 0.354

IN-00581: 0.463

IN-D5803: 0.544

IN-R9805: 0.355

M2: 0.499

Maximum observed in laboratory soil degradation studies:

IN-L5296: ~~91.1~~ 85.7%

IN-A4098: 12.6%

IN-00581: 33.9%

IN-D5803: ~~6.1~~ 46.6%

IN-R9805: 7.6%

M2: 16.2%

DT<sub>50</sub> (d):

IN-L5296: 505 days

IN-A4098: 260.1 days

IN-00581: 237.4 days

IN-D5803: 26.4 days

IN-R9805: 380 days

M2: 23.3 days (correct value should be 73.2 days; however has no impact on the PECs calculated here as DT<sub>50</sub> < 90 days and only one application per year)

Kinetics: SFO

Lab: representative worst case from lab studies.

Application data

Application rate assumed: 30 g/ha x (maximum obs of metabolite( %/100) x molecular weight ratio

PEC(s)  
(mg/kg)

|  | Single application<br>Actual | Single application<br>Time weighted average | Multiple application<br>Actual | Multiple application<br>Time weighted average |
|--|------------------------------|---------------------------------------------|--------------------------------|-----------------------------------------------|
|  |                              |                                             |                                |                                               |

|                                      |                    |  |                |  |
|--------------------------------------|--------------------|--|----------------|--|
| IN-L5296<br>Plateau<br>concentration | 0.014              |  | Not applicable |  |
|                                      | 0.0197 after 20 yr |  |                |  |

|                                                               |                              |                                             |                                |                                               |
|---------------------------------------------------------------|------------------------------|---------------------------------------------|--------------------------------|-----------------------------------------------|
| PEC(s)<br>(mg/kg)<br><br>IN-A4098<br>Plateau<br>concentration | Single application<br>Actual | Single application<br>Time weighted average | Multiple application<br>Actual | Multiple application<br>Time weighted average |
|                                                               | 0.0018                       |                                             | Not applicable                 |                                               |
|                                                               | 0.0022 after 20 yr           |                                             |                                |                                               |

|                                                               |                              |                                             |                                |                                               |
|---------------------------------------------------------------|------------------------------|---------------------------------------------|--------------------------------|-----------------------------------------------|
| PEC(s)<br>(mg/kg)<br><br>IN-00581<br>Plateau<br>concentration | Single application<br>Actual | Single application<br>Time weighted average | Multiple application<br>Actual | Multiple application<br>Time weighted average |
|                                                               | Not available                |                                             | Not applicable                 |                                               |
|                                                               | 0.0096 after 20 yr           |                                             |                                |                                               |

|                                                               |                              |                                             |                                |                                               |
|---------------------------------------------------------------|------------------------------|---------------------------------------------|--------------------------------|-----------------------------------------------|
| PEC(s)<br>(mg/kg)<br><br>IN-D5803<br>Plateau<br>concentration | Single application<br>Actual | Single application<br>Time weighted average | Multiple application<br>Actual | Multiple application<br>Time weighted average |
|                                                               | Not available                |                                             | Not applicable                 |                                               |
|                                                               | 0.0101 after 20 yr           |                                             |                                |                                               |

|                                                               |                              |                                             |                                |                                               |
|---------------------------------------------------------------|------------------------------|---------------------------------------------|--------------------------------|-----------------------------------------------|
| PEC(s)<br>(mg/kg)<br><br>IN-R9805<br>Plateau<br>concentration | Single application<br>Actual | Single application<br>Time weighted average | Multiple application<br>Actual | Multiple application<br>Time weighted average |
|                                                               | Not available                |                                             | Not applicable                 |                                               |
|                                                               | 0.0022 after 20 yr           |                                             |                                |                                               |

|                                                         |                              |                                             |                                |                                               |
|---------------------------------------------------------|------------------------------|---------------------------------------------|--------------------------------|-----------------------------------------------|
| PEC(s)<br>(mg/kg)<br><br>M2<br>Plateau<br>concentration | Single application<br>Actual | Single application<br>Time weighted average | Multiple application<br>Actual | Multiple application<br>Time weighted average |
|                                                         | Not available                |                                             | Not applicable                 |                                               |
|                                                         | 0.0032 after 20 yr           |                                             |                                |                                               |

|                                                        |                                                                                                                                                                                                                                                                                     |
|--------------------------------------------------------|-------------------------------------------------------------------------------------------------------------------------------------------------------------------------------------------------------------------------------------------------------------------------------------|
| Tribenuron-methyl in CHA 6310<br>Method of calculation | DT <sub>50</sub> (d): 34.7 days<br>Kinetics: SFO<br>representative non-normalised from field studies                                                                                                                                                                                |
| Application data                                       | Crop: Cereals<br>Depth of soil layer 20 cm<br>Soil bulk density: 1.5g/cm <sup>3</sup><br>% plant interception: Post-emergence at BBCH 12-39 so 25 %<br>crop interception assumed.<br>Number of applications: 1<br>Interval (d): not applicable<br>Application rate(s): 30 g a.s./ha |

|                                  |                              |                                             |                                |                                               |
|----------------------------------|------------------------------|---------------------------------------------|--------------------------------|-----------------------------------------------|
| PEC(s)<br>(mg/kg)<br><br>Initial | Single application<br>Actual | Single application<br>Time weighted average | Multiple application<br>Actual | Multiple application<br>Time weighted average |
|                                  | 0.030                        |                                             | Not applicable                 |                                               |

|                       |                              |                                             |                                |                                               |
|-----------------------|------------------------------|---------------------------------------------|--------------------------------|-----------------------------------------------|
| PEC(s)<br>(mg/kg)     | Single application<br>Actual | Single application<br>Time weighted average | Multiple application<br>Actual | Multiple application<br>Time weighted average |
| Plateau concentration | Not required                 |                                             |                                |                                               |

|                                                                                                       |                                                                                                                                                                                                                                                                                                                                                                                                                                                                                                                                                                              |  |  |  |
|-------------------------------------------------------------------------------------------------------|------------------------------------------------------------------------------------------------------------------------------------------------------------------------------------------------------------------------------------------------------------------------------------------------------------------------------------------------------------------------------------------------------------------------------------------------------------------------------------------------------------------------------------------------------------------------------|--|--|--|
| Metabolites<br>IN-L5296<br>IN-A4098<br>IN-00581<br>IN-D5803<br>IN-R9805<br>M2<br>IN-GK521<br>IN-R9803 | Molecular weight relative to the parent (=1):<br>IN-L5296: 0.390<br>IN-A4098: 0.355<br>IN-00581: 0.463<br>IN-D5803: 0.544<br>IN-R9805: 0.355<br>M2: 0.499<br><del>IN-D5119: 0.509</del><br>IN-GK521: 0.965<br><del>IN-GN815: 0.929</del><br>IN-R9803: 0.965                                                                                                                                                                                                                                                                                                                  |  |  |  |
| Method of calculation                                                                                 | Maximum observed in laboratory soil degradation studies:<br>IN-L5296: 85.7%<br>IN-A4098: 12.6%<br>IN-00581: 33.9%<br>IN-D5803: 46.6%<br>IN-R9805: 7.6%<br>M2: 16.2%<br>IN-GK521: 32.1%<br>IN-R9803: 9.1%<br><br>DT <sub>50</sub> (d):<br>IN-L5296: 505 days<br>IN-A4098: 333 days<br>IN-00581: 237.4 days<br>IN-D5803: 26.4 days<br>IN-R9805: 380 days<br>M2: 23.3 days (correct value should be 73.2 days; however has no impact on the PECs calculated here as DT <sub>50</sub> < 90 days and only one application per year)<br>IN-GK521: 51.9 days<br>IN-R9803: 18.2 days |  |  |  |
| Application data                                                                                      | Kinetics: SFO<br>Lab: representative worst case from lab studies.<br>Application rate assumed: 30 g/ha x (maximum obs of metabolite( %/100) x molecular weight ratio                                                                                                                                                                                                                                                                                                                                                                                                         |  |  |  |

|                       |                              |                                             |                                |                                               |
|-----------------------|------------------------------|---------------------------------------------|--------------------------------|-----------------------------------------------|
| PEC(s)<br>(mg/kg)     | Single application<br>Actual | Single application<br>Time weighted average | Multiple application<br>Actual | Multiple application<br>Time weighted average |
| IN-L5296              | 0.010                        |                                             | Not applicable                 |                                               |
| Plateau concentration | 0.0135 after 3 yr            |                                             |                                |                                               |

|                       |                              |                                             |                                |                                               |
|-----------------------|------------------------------|---------------------------------------------|--------------------------------|-----------------------------------------------|
| PEC(s)<br>(mg/kg)     | Single application<br>Actual | Single application<br>Time weighted average | Multiple application<br>Actual | Multiple application<br>Time weighted average |
| IN-A4098              | 0.001                        |                                             | Not applicable                 |                                               |
| Plateau concentration | 0.0013 after 2 yr            |                                             |                                |                                               |

|                                      |                              |                                             |                                |                                               |
|--------------------------------------|------------------------------|---------------------------------------------|--------------------------------|-----------------------------------------------|
| <b>PEC(s)</b><br>(mg/kg)             | Single application<br>Actual | Single application<br>Time weighted average | Multiple application<br>Actual | Multiple application<br>Time weighted average |
|                                      | 0.0059                       |                                             | Not applicable                 |                                               |
| IN-00581<br>Plateau<br>concentration | 0.0067 after 3 yr            |                                             |                                |                                               |
| <b>PEC(s)</b><br>(mg/kg)             | Single application<br>Actual | Single application<br>Time weighted average | Multiple application<br>Actual | Multiple application<br>Time weighted average |
|                                      | 0.008                        |                                             | Not applicable                 |                                               |
| IN-D5803<br>Plateau<br>concentration | Not applicable               |                                             |                                |                                               |
| <b>PEC(s)</b><br>(mg/kg)             | Single application<br>Actual | Single application<br>Time weighted average | Multiple application<br>Actual | Multiple application<br>Time weighted average |
|                                      | 0.001                        |                                             | Not applicable                 |                                               |
| IN-R9805<br>Plateau<br>concentration | 0.001 after 1 yr             |                                             |                                |                                               |
| <b>PEC(s)</b><br>(mg/kg)             | Single application<br>Actual | Single application<br>Time weighted average | Multiple application<br>Actual | Multiple application<br>Time weighted average |
|                                      | 0.002                        |                                             | Not applicable                 |                                               |
| M2<br>Plateau<br>concentration       | Not applicable               |                                             |                                |                                               |
| <b>PEC(s)</b><br>(mg/kg)             | Single application<br>Actual | Single application<br>Time weighted average | Multiple application<br>Actual | Multiple application<br>Time weighted average |
|                                      | 0.0094                       |                                             | Not applicable                 |                                               |
| IN-GK521<br>Plateau<br>concentration | Not applicable               |                                             |                                |                                               |
| <b>PEC(s)</b><br>(mg/kg)             | Single application<br>Actual | Single application<br>Time weighted average | Multiple application<br>Actual | Multiple application<br>Time weighted average |
|                                      | 0.003                        |                                             | Not applicable                 |                                               |
| IN-R9803<br>Plateau<br>concentration | Not applicable               |                                             |                                |                                               |

**PEC ground water (Regulation (EU) N° 284/2013, Annex Part A, point 9.2.4.1)**

Method of calculation and type of study (Groundwater modelling)

**Tribenuron-methyl in DPX-L5300**

Metabolites: IN-L5296, IN-A4098, IN-00581, IN-R9805 and IN-D5803

FOCUS Models used: PEARL 4.4.4 and PELMO 5.5.3  
 Crop: Sunflowers, pastures, spring cereals, winter cereals and olives.  
 Crop uptake factor: 0 for parent and 0 for all metabolites

Standard calculations for parent and metabolites where DegT<sub>50</sub> and K<sub>foc</sub> pH dependency in soil for parent was taken into account. Higher tier calculations for parent and its aerobic soil metabolites in alkaline soil (using normalised field DT<sub>50</sub> for parent).

All DT<sub>50</sub>s normalised with regard to temperature (Q<sub>10</sub>=2.58). Field DT<sub>50</sub>s also normalised with regard to moisture (Walker exponent 0.7).

Tribenuron-methyl

Geometric mean lab DT<sub>50</sub> (standard calc.): 5.4 days (pH <7), 16.7 days (pH >7), 3.6 days (field)  
 Arithmetic mean K<sub>foc</sub> (mL/g): 46.3 (pH <7), 9.36 (pH >7)  
 1/n= 0.98 (pH <7), 1.0 (pH >7)  
 Water solubility (mg/L): 2483 at pH 7 and 20°C  
 Vapour pressure: 5.99 x 10<sup>-9</sup> Pa at 25°C

IN-L5296

Geometric mean lab DT<sub>50</sub> : 207.5 d  
 Arithmetic mean K<sub>foc</sub> (mL/g): 86.2\*  
 1/n= 0.80  
 parent → IN-L5296, ff= 0.80\*\*  
 Water solubility (mg/L): 2483 at pH 7 and 20°C  
 Vapour pressure: 0  
 \* the correct arithmetic mean K<sub>FOC</sub> that should be used is 89.4 mL/g, however there is no impact on the PECs calculated  
 \*\*the correct ff that should be used is 0.76, however it is unlikely that this deficiency has an impact on the groundwater exposure assessment for this metabolite.

IN-A4098

Geometric mean lab DT<sub>50</sub> : 127.7 d  
 Arithmetic mean K<sub>foc</sub> (mL/g): 71.2\*  
 1/n= 0.91  
 IN-L5296 → IN-4098, ff= 1.0  
 Water solubility (mg/L): 456 at pH 7 and 20°C  
 Vapour pressure: 1.9 x 10<sup>-4</sup> Pa at 25°C  
 \*the correct arithmetic mean K<sub>FOC</sub> that should be used is 71.1 mL/g, however there is no impact on the groundwater exposure assessment for this metabolite.

IN-00581

Geometric mean lab DT<sub>50</sub> : 19.1d  
 Arithmetic mean K<sub>foc</sub> (mL/g): 7.2  
 1/n= 0.91  
 Parent → IN-00581, ff= 1.0  
 Water solubility (mg/L): 2483 at pH 7 and 20°C  
 Vapour pressure: 0

IN-R9805

Geometric mean lab DT<sub>50</sub> : 85.5 d\*  
 Arithmetic mean K<sub>foc</sub> (mL/g): 105\*  
 1/n= 0.93\*  
 IN-L5296 → IN-R9805, ff=1.0 or ff = 0.5 for refinement  
 Water solubility (mg/L): 2483 at pH 7 and 20°C  
 Vapour pressure: 0  
 \* the correct geometric mean lab DT<sub>50</sub> that should be used is

Application rate

85.4d, however there is no impact on the groundwater exposure assessment for this metabolite. The correct geometric mean adsorption values that should be used are  $K_{foc}$  (mL/g) 72.3  $1/n=0.939$ .

#### M2

Geometric mean lab  $DT_{50}$  : 14.3 d\*

Arithmetic mean  $K_{foc}$  (mL/g): 97.7\*\*

$1/n=0.87$

parent → M2,  $ff=1.0$  (or 1-0.72 from IN-L5296)\*\*\*

Water solubility (mg/L): 2483 at pH 7 and 20°C

Vapour pressure: 0

\* the correct geometric mean lab  $DT_{50}$  that should be used is 21.5d; \*\* the correct arithmetic mean  $K_{FOC}$  that should be used is 78.3 mL/g, \*\*\* the correct  $ff$  that should be used is 0.24. Based on the  $PEC_{gw}$  values available, it is unlikely that these deficiencies will have an impact on final exposure groundwater assessment for metabolite M2 for the representative uses applied for tribenuron-methyl in DPX-L5300.

#### Sunflowers

Gross application rate: 30 g/ha.

Crop growth stage: BBCH 12-18

Canopy interception 20%:

Application rate net of interception: 24 g/ha.

No. of applications:1

Time of application (relative application dates): 5 days post emergence for all scenarios.

#### Pastures

Gross application rate: 7.5 g/ha.

Crop growth stage: Established grass

Canopy interception 90%:

Application rate net of interception: 0.75 g/ha.

No. of applications:1

Time of application (absolute application dates): 1 March for all scenarios.

#### Spring cereals

Gross application rate: 22.5 g/ha.

Crop growth stage: BBCH 30-39

Canopy interception 80%:

Application rate net of interception: 4.5 g/ha.

No. of applications: 1

Time of application (relative application dates): 45 days post emergence for all scenarios.

#### Winter cereals

Gross application rate: 24 g/ha.

Crop growth stage: BBCH 30-39

Canopy interception 80%:

Application rate net of interception: 4.8 g/ha.

No. of applications: 1

Time of application (absolute application dates): 1 Apr for all scenarios except for Jokioinen where 1 May was used.

#### Olives (apples as a surrogate crop)

Gross application rate: 20 g/ha.

Crop growth stage: early spring application

Canopy interception 0%:

Application rate net of interception: 20 g/ha.

No. of applications: 1

Time of application (absolute application date): 1 March for all SEU scenarios (Piacenza, Porto, Sevilla and Thiva). No NEU scenarios were modelled.



| PEARL 4.4.4 / Pasture | DPX-L5300    |               |        |                                |                 |        |                 |       |
|-----------------------|--------------|---------------|--------|--------------------------------|-----------------|--------|-----------------|-------|
|                       | Scenario     | Parent (µg/L) |        |                                | IN-L5296 (µg/L) |        | IN-A4098 (µg/L) |       |
|                       |              | pH<7          | pH>7   | pH>7<br>Field DT <sub>50</sub> | pH<7            | pH>7   | pH<7            | pH>7  |
|                       | Chateaudun   | <0.001        | 0.006  | <0.001                         | <0.001          | 0.004  | 0.007           | 0.013 |
|                       | Hamburg      | <0.001        | 0.014  | <0.001                         | <0.001          | 0.005  | 0.010           | 0.016 |
|                       | Jokioinen    | <0.001        | 0.025  | <0.001                         | <0.001          | 0.003  | 0.007           | 0.013 |
|                       | Kremsmunster | <0.001        | 0.007  | <0.001                         | <0.001          | 0.005  | 0.006           | 0.012 |
|                       | Okehampton   | <0.001        | 0.012  | <0.001                         | <0.001          | 0.007  | 0.009           | 0.013 |
|                       | Piacenza     | <0.001        | 0.007  | <0.001                         | <0.001          | 0.006  | 0.008           | 0.015 |
|                       | Porto        | <0.001        | 0.005  | <0.001                         | <0.001          | 0.002  | 0.005           | 0.007 |
|                       | Sevilla      | <0.001        | <0.001 | <0.001                         | <0.001          | <0.001 | 0.003           | 0.006 |
|                       | Thiva        | <0.001        | <0.001 | <0.001                         | <0.001          | <0.001 | 0.005           | 0.008 |

| PEARL 4.4.4 / Pasture | DPX-L5300    |                 |                |                  |                  |                 |       |           |        |
|-----------------------|--------------|-----------------|----------------|------------------|------------------|-----------------|-------|-----------|--------|
|                       | Scenario     | IN-R9805 (µg/L) |                |                  |                  | IN-00581 (µg/L) |       | M2 (µg/L) |        |
|                       |              | pH<7<br>(ff=1)  | pH>7<br>(ff=1) | pH<7<br>(ff=0.5) | pH>7<br>(ff=0.5) | pH<7            | pH>7  | pH<7      | pH>7   |
|                       | Chateaudun   | 0.003           | 0.008          | 0.001            | 0.004            | 0.002           | 0.008 | <0.001    | <0.001 |
|                       | Hamburg      | 0.005           | 0.009          | 0.002            | 0.004            | 0.005           | 0.016 | <0.001    | 0.001  |
|                       | Jokioinen    | 0.002           | 0.007          | 0.001            | 0.003            | 0.005           | 0.021 | <0.001    | <0.001 |
|                       | Kremsmunster | 0.003           | 0.007          | 0.001            | 0.004            | 0.003           | 0.009 | <0.001    | <0.001 |
|                       | Okehampton   | 0.005           | 0.009          | 0.002            | 0.004            | 0.004           | 0.013 | <0.001    | 0.001  |
|                       | Piacenza     | 0.004           | 0.009          | 0.002            | 0.004            | 0.003           | 0.008 | <0.001    | 0.001  |
|                       | Porto        | 0.002           | 0.005          | 0.001            | 0.002            | 0.002           | 0.005 | <0.001    | <0.001 |
|                       | Sevilla      | 0.001           | 0.003          | <0.001           | 0.001            | <0.001          | 0.001 | <0.001    | <0.001 |
|                       | Thiva        | 0.002           | 0.003          | 0.001            | 0.002            | <0.001          | 0.001 | <0.001    | <0.001 |

| PELMO 5.5.3 / Pasture | DPX-L5300    |               |        |                                   |                 |       |                 |       |
|-----------------------|--------------|---------------|--------|-----------------------------------|-----------------|-------|-----------------|-------|
|                       | Scenario     | Parent (µg/L) |        |                                   | IN-L5296 (µg/L) |       | IN-A4098 (µg/L) |       |
|                       |              | pH<7          | pH>7   | pH>7<br>Field<br>DT <sub>50</sub> | pH<7            | pH>7  | pH<7            | pH>7  |
|                       | Chateaudun   | <0.001        | 0.003  | <0.001                            | <0.001          | 0.003 | 0.006           | 0.011 |
|                       | Hamburg      | <0.001        | 0.011  | <0.001                            | 0.001           | 0.004 | 0.008           | 0.013 |
|                       | Jokioinen    | <0.001        | 0.025  | 0.001                             | <0.001          | 0.004 | 0.006           | 0.012 |
|                       | Kremsmunster | <0.001        | 0.008  | <0.001                            | 0.001           | 0.005 | 0.006           | 0.012 |
|                       | Okehampton   | <0.001        | 0.014  | <0.001                            | 0.001           | 0.008 | 0.009           | 0.013 |
|                       | Piacenza     | <0.001        | 0.018  | 0.001                             | 0.002           | 0.010 | 0.008           | 0.013 |
|                       | Porto        | <0.001        | 0.008  | <0.001                            | 0.001           | 0.004 | 0.006           | 0.007 |
|                       | Sevilla      | <0.001        | <0.001 | <0.001                            | <0.001          | 0.001 | 0.003           | 0.005 |
|                       | Thiva        | <0.001        | <0.001 | <0.001                            | <0.001          | 0.001 | 0.005           | 0.008 |

| PELMO 5.5.3 / Pasture | DPX-L5300  |                 |                |                  |                  |                 |       |           |        |
|-----------------------|------------|-----------------|----------------|------------------|------------------|-----------------|-------|-----------|--------|
|                       | Scenario   | IN-R9805 (µg/L) |                |                  |                  | IN-00581 (µg/L) |       | M2 (µg/L) |        |
|                       |            | pH<7<br>(ff=1)  | pH>7<br>(ff=1) | pH<7<br>(ff=0.5) | pH>7<br>(ff=0.5) | pH<7            | pH>7  | pH<7      | pH>7   |
|                       | Chateaudun | 0.002           | 0.006          | 0.001            | 0.003            | 0.002           | 0.006 | <0.001    | <0.001 |
|                       | Hamburg    | 0.004           | 0.007          | 0.002            | 0.004            | 0.004           | 0.011 | <0.001    | 0.001  |
|                       | Jokioinen  | 0.002           | 0.008          | 0.001            | 0.004            | 0.005           | 0.017 | <0.001    | 0.001  |

|  |              |       |       |        |       |        |       |        |        |
|--|--------------|-------|-------|--------|-------|--------|-------|--------|--------|
|  | Kremsmunster | 0.003 | 0.007 | 0.001  | 0.004 | 0.003  | 0.010 | <0.001 | 0.001  |
|  | Okehampton   | 0.005 | 0.009 | 0.002  | 0.005 | 0.005  | 0.014 | <0.001 | 0.002  |
|  | Piacenza     | 0.005 | 0.009 | 0.002  | 0.004 | 0.006  | 0.011 | <0.001 | 0.003  |
|  | Porto        | 0.003 | 0.005 | 0.002  | 0.003 | 0.002  | 0.006 | <0.001 | 0.001  |
|  | Sevilla      | 0.001 | 0.002 | <0.001 | 0.001 | <0.001 | 0.001 | <0.001 | <0.001 |
|  | Thiva        | 0.002 | 0.004 | 0.001  | 0.002 | <0.001 | 0.001 | <0.001 | <0.001 |

| PEARL 4.4.4 /spring cereals | DPX-L5300    |               |       |                             |                 |       |                 |       |
|-----------------------------|--------------|---------------|-------|-----------------------------|-----------------|-------|-----------------|-------|
|                             | Scenario     | Parent (µg/L) |       |                             | IN-L5296 (µg/L) |       | IN-A4098 (µg/L) |       |
|                             |              | pH<7          | pH>7  | pH>7 Field DT <sub>50</sub> | pH<7            | pH>7  | pH<7            | pH>7  |
|                             | Chateaudun   | <0.001        | 0.016 | <0.001                      | <0.001          | 0.011 | 0.037           | 0.063 |
|                             | Hamburg      | <0.001        | 0.142 | <0.001                      | 0.014           | 0.055 | 0.097           | 0.120 |
|                             | Jokioinen    | <0.001        | 0.132 | <0.001                      | <0.001          | 0.021 | 0.043           | 0.065 |
|                             | Kremsmunster | <0.001        | 0.070 | <0.001                      | 0.008           | 0.053 | 0.065           | 0.094 |
|                             | Okehampton   | <0.001        | 0.068 | <0.001                      | 0.012           | 0.047 | 0.070           | 0.083 |
|                             | Porto        | <0.001        | 0.012 | <0.001                      | 0.003           | 0.009 | 0.043           | 0.050 |

| PEARL 4.4.4 /spring cereals | DPX-L5300    |                 |             |               |               |                 |       |           |        |
|-----------------------------|--------------|-----------------|-------------|---------------|---------------|-----------------|-------|-----------|--------|
|                             | Scenario     | IN-R9805 (µg/L) |             |               |               | IN-00581 (µg/L) |       | M2 (µg/L) |        |
|                             |              | pH<7 (ff=1)     | pH>7 (ff=1) | pH<7 (ff=0.5) | pH>7 (ff=0.5) | pH<7            | pH>7  | pH<7      | pH>7   |
|                             | Chateaudun   | 0.011           | 0.028       | 0.005         | 0.013         | 0.008           | 0.027 | <0.001    | <0.001 |
|                             | Hamburg      | 0.048           | 0.067       | 0.022         | 0.032         | 0.064           | 0.143 | <0.001    | 0.018  |
|                             | Jokioinen    | 0.015           | 0.034       | 0.006         | 0.016         | 0.055           | 0.117 | <0.001    | 0.005  |
|                             | Kremsmunster | 0.031           | 0.057       | 0.014         | 0.027         | 0.029           | 0.084 | <0.001    | 0.008  |
|                             | Okehampton   | 0.036           | 0.052       | 0.017         | 0.025         | 0.033           | 0.072 | <0.001    | 0.007  |
|                             | Porto        | 0.021           | 0.028       | 0.010         | 0.013         | 0.007           | 0.020 | <0.001    | <0.001 |

| PELMO 5.5.3 /Spring cereals | DPX-L5300    |               |       |                             |                 |       |                 |       |
|-----------------------------|--------------|---------------|-------|-----------------------------|-----------------|-------|-----------------|-------|
|                             | Scenario     | Parent (µg/L) |       |                             | IN-L5296 (µg/L) |       | IN-A4098 (µg/L) |       |
|                             |              | pH<7          | pH>7  | pH>7 Field DT <sub>50</sub> | pH<7            | pH>7  | pH<7            | pH>7  |
|                             | Chateaudun   | <0.001        | 0.009 | <0.001                      | 0.001           | 0.006 | 0.028           | 0.048 |
|                             | Hamburg      | <0.001        | 0.056 | <0.001                      | 0.010           | 0.032 | 0.084           | 0.099 |
|                             | Jokioinen    | <0.001        | 0.126 | <0.001                      | 0.001           | 0.014 | 0.039           | 0.057 |
|                             | Kremsmunster | <0.001        | 0.067 | <0.001                      | 0.007           | 0.047 | 0.062           | 0.096 |
|                             | Okehampton   | <0.001        | 0.064 | <0.001                      | 0.011           | 0.040 | 0.067           | 0.078 |
|                             | Porto        | <0.001        | 0.016 | <0.001                      | 0.005           | 0.011 | 0.045           | 0.051 |

| PELMO 5.5.3 /spring cereals | DPX-L5300    |                 |             |               |               |                 |       |           |       |
|-----------------------------|--------------|-----------------|-------------|---------------|---------------|-----------------|-------|-----------|-------|
|                             | Scenario     | IN-R9805 (µg/L) |             |               |               | IN-00581 (µg/L) |       | M2 (µg/L) |       |
|                             |              | pH<7 (ff=1)     | pH>7 (ff=1) | pH<7 (ff=0.5) | pH>7 (ff=0.5) | pH<7            | pH>7  | pH<7      | pH>7  |
|                             | Chateaudun   | 0.007           | 0.019       | 0.003         | 0.009         | 0.004           | 0.013 | <0.001    | 0.001 |
|                             | Hamburg      | 0.040           | 0.055       | 0.018         | 0.026         | 0.029           | 0.073 | <0.001    | 0.005 |
|                             | Jokioinen    | 0.013           | 0.028       | 0.006         | 0.013         | 0.052           | 0.103 | <0.001    | 0.003 |
|                             | Kremsmunster | 0.028           | 0.056       | 0.013         | 0.027         | 0.031           | 0.087 | <0.001    | 0.007 |
|                             | Okehampton   | 0.035           | 0.049       | 0.016         | 0.023         | 0.032           | 0.067 | <0.001    | 0.006 |

|       |       |       |       |       |       |       |        |       |
|-------|-------|-------|-------|-------|-------|-------|--------|-------|
| Porto | 0.024 | 0.029 | 0.011 | 0.014 | 0.009 | 0.027 | <0.001 | 0.001 |
|-------|-------|-------|-------|-------|-------|-------|--------|-------|

| PEARL 4.4.4 / winter cereals | DPX-L5300 |               |        |                             |                 |       |                 |      |
|------------------------------|-----------|---------------|--------|-----------------------------|-----------------|-------|-----------------|------|
|                              | Scenario  | Parent (µg/L) |        |                             | IN-L5296 (µg/L) |       | IN-A4098 (µg/L) |      |
|                              |           | pH<7          | pH>7   | pH>7 Field DT <sub>50</sub> | pH<7            | pH>7  | pH<7            | pH>7 |
| Chateaudun                   | <0.001    | 0.017         | <0.001 | <0.001                      | 0.017           | 0.046 | 0.081           |      |
| Hamburg                      | <0.001    | 0.089         | <0.001 | 0.013                       | 0.048           | 0.091 | 0.108           |      |
| Jokioinen                    | <0.001    | 0.090         | <0.001 | <0.001                      | 0.018           | 0.051 | 0.080           |      |
| Kremsmunster                 | <0.001    | 0.066         | <0.001 | 0.010                       | 0.055           | 0.065 | 0.085           |      |
| Okehampton                   | <0.001    | 0.074         | <0.001 | 0.014                       | 0.060           | 0.074 | 0.085           |      |
| Porto                        | <0.001    | 0.042         | <0.001 | 0.008                       | 0.039           | 0.057 | 0.086           |      |
| Sevilla                      | <0.001    | 0.018         | <0.001 | 0.004                       | 0.018           | 0.046 | 0.060           |      |
| Thiva                        | <0.001    | <0.001        | <0.001 | <0.001                      | <0.001          | 0.001 | 0.002           |      |

| PEARL 4.4.4 / winter cereals | DPX-L5300 |                 |             |               |               |                 |        |           |      |
|------------------------------|-----------|-----------------|-------------|---------------|---------------|-----------------|--------|-----------|------|
|                              | Scenario  | IN-R9805 (µg/L) |             |               |               | IN-00581 (µg/L) |        | M2 (µg/L) |      |
|                              |           | pH<7 (ff=1)     | pH>7 (ff=1) | pH<7 (ff=0.5) | pH>7 (ff=0.5) | pH<7            | pH>7   | pH<7      | pH>7 |
| Chateaudun                   | 0.014     | 0.038           | 0.006       | 0.018         | 0.009         | 0.030           | <0.001 | 0.001     |      |
| Hamburg                      | 0.045     | 0.061           | 0.021       | 0.029         | 0.047         | 0.104           | <0.001 | 0.010     |      |
| Jokioinen                    | 0.016     | 0.037           | 0.007       | 0.017         | 0.037         | 0.095           | <0.001 | 0.004     |      |
| Kremsmunster                 | 0.033     | 0.053           | 0.015       | 0.025         | 0.032         | 0.077           | <0.001 | 0.009     |      |
| Okehampton                   | 0.040     | 0.054           | 0.019       | 0.026         | 0.039         | 0.087           | <0.001 | 0.010     |      |
| Piacenza                     | 0.027     | 0.047           | 0.013       | 0.023         | 0.018         | 0.048           | <0.001 | 0.007     |      |
| Porto                        | 0.023     | 0.035           | 0.011       | 0.017         | 0.008         | 0.027           | <0.001 | <0.001    |      |
| Sevilla                      | <0.001    | 0.001           | <0.001      | <0.001        | <0.001        | 0.001           | <0.001 | <0.001    |      |
| Thiva                        | 0.010     | 0.017           | 0.004       | 0.007         | 0.001         | 0.004           | <0.001 | <0.001    |      |

| PELMO 5.5.3 / winter cereals | DPX-L5300 |               |        |                             |                 |       |                 |      |
|------------------------------|-----------|---------------|--------|-----------------------------|-----------------|-------|-----------------|------|
|                              | Scenario  | Parent (µg/L) |        |                             | IN-L5296 (µg/L) |       | IN-A4098 (µg/L) |      |
|                              |           | pH<7          | pH>7   | pH>7 Field DT <sub>50</sub> | pH<7            | pH>7  | pH<7            | pH>7 |
| Chateaudun                   | <0.001    | 0.013         | <0.001 | 0.001                       | 0.010           | 0.040 | 0.075           |      |
| Hamburg                      | <0.001    | 0.068         | <0.001 | 0.014                       | 0.049           | 0.100 | 0.124           |      |
| Jokioinen                    | <0.001    | 0.097         | <0.001 | 0.001                       | 0.017           | 0.056 | 0.082           |      |
| Kremsmunster                 | <0.001    | 0.077         | <0.001 | 0.011                       | 0.073           | 0.075 | 0.103           |      |
| Okehampton                   | <0.001    | 0.080         | <0.001 | 0.016                       | 0.063           | 0.080 | 0.093           |      |
| Piacenza                     | <0.001    | 0.043         | 0.001  | 0.009                       | 0.049           | 0.069 | 0.107           |      |
| Porto                        | <0.001    | 0.016         | <0.001 | 0.006                       | 0.019           | 0.054 | 0.065           |      |
| Sevilla                      | <0.001    | 0.001         | <0.001 | <0.001                      | <0.001          | 0.002 | 0.003           |      |
| Thiva                        | <0.001    | 0.001         | <0.001 | <0.001                      | <0.001          | 0.024 | 0.029           |      |

| PELMO 5.5.3 / winter cereals | DPX-L5300 |                 |             |               |               |                 |        |           |      |
|------------------------------|-----------|-----------------|-------------|---------------|---------------|-----------------|--------|-----------|------|
|                              | Scenario  | IN-R9805 (µg/L) |             |               |               | IN-00581 (µg/L) |        | M2 (µg/L) |      |
|                              |           | pH<7 (ff=1)     | pH>7 (ff=1) | pH<7 (ff=0.5) | pH>7 (ff=0.5) | pH<7            | pH>7   | pH<7      | pH>7 |
| Chateaudun                   | 0.011     | 0.032           | 0.005       | 0.015         | 0.006         | 0.026           | <0.001 | 0.001     |      |
| Hamburg                      | 0.049     | 0.072           | 0.023       | 0.034         | 0.028         | 0.089           | <0.001 | 0.006     |      |

|              |        |       |        |        |        |       |        |        |
|--------------|--------|-------|--------|--------|--------|-------|--------|--------|
| Jokioinen    | 0.020  | 0.041 | 0.009  | 0.019  | 0.039  | 0.097 | <0.001 | 0.004  |
| Kremsmunster | 0.036  | 0.063 | 0.017  | 0.030  | 0.036  | 0.094 | <0.001 | 0.010  |
| Okehampton   | 0.043  | 0.061 | 0.020  | 0.029  | 0.040  | 0.089 | <0.001 | 0.009  |
| Piacenza     | 0.032  | 0.054 | 0.015  | 0.026  | 0.013  | 0.057 | <0.001 | 0.007  |
| Porto        | 0.029  | 0.039 | 0.014  | 0.019  | 0.008  | 0.026 | <0.001 | 0.001  |
| Sevilla      | <0.001 | 0.001 | <0.001 | <0.001 | <0.001 | 0.001 | <0.001 | <0.001 |
| Thiva        | 0.005  | 0.006 | 0.002  | 0.003  | <0.001 | 0.001 | <0.001 | <0.001 |

| DPX-L5300                  |          |                  |       |                                   |                    |       |                    |       |
|----------------------------|----------|------------------|-------|-----------------------------------|--------------------|-------|--------------------|-------|
| PEARL 4.4.4<br>/sunflowers | Scenario | Parent<br>(µg/L) |       |                                   | IN-L5296<br>(µg/L) |       | IN-A4098<br>(µg/L) |       |
|                            |          | pH<7             | pH>7  | pH>7<br>Field<br>DT <sub>50</sub> | pH<7               | pH>7  | pH<7               | pH>7  |
|                            | Piacenza | <0.001           | 0.129 | <0.001                            | 0.138              | 0.301 | 0.487              | 0.659 |
|                            | Sevilla  | <0.001           | 0.007 | <0.001                            | 0.004              | 0.019 | 0.137              | 0.211 |

| DPX-L5300                  |          |                    |                |                  |                  |                    |       |              |        |
|----------------------------|----------|--------------------|----------------|------------------|------------------|--------------------|-------|--------------|--------|
| PEARL 4.4.4<br>/sunflowers | Scenario | IN-R9805<br>(µg/L) |                |                  |                  | IN-00581<br>(µg/L) |       | M2<br>(µg/L) |        |
|                            |          | pH<7<br>(ff=1)     | pH>7<br>(ff=1) | pH<7<br>(ff=0.5) | pH>7<br>(ff=0.5) | pH<7               | pH>7  | pH<7         | pH>7   |
|                            | Piacenza | 0.226              | 0.323          | 0.107            | 0.153            | 0.083              | 0.226 | <0.001       | 0.027  |
|                            | Sevilla  | 0.035              | 0.072          | 0.015            | 0.033            | 0.008              | 0.026 | <0.001       | <0.001 |

| DPX-L5300                  |          |                  |       |                                   |                    |       |                    |       |
|----------------------------|----------|------------------|-------|-----------------------------------|--------------------|-------|--------------------|-------|
| PELMO 5.5.3<br>/sunflowers | Scenario | Parent<br>(µg/L) |       |                                   | IN-L5296<br>(µg/L) |       | IN-A4098<br>(µg/L) |       |
|                            |          | pH<7             | pH>7  | pH>7<br>Field<br>DT <sub>50</sub> | pH<7               | pH>7  | pH<7               | pH>7  |
|                            | Piacenza | <0.001           | 0.248 | 0.001                             | 0.148              | 0.330 | 0.414              | 0.507 |
|                            | Sevilla  | <0.001           | 0.015 | <0.001                            | 0.001              | 0.009 | 0.112              | 0.178 |

| DPX-L5300                  |          |                    |                |                  |                  |                    |       |              |        |
|----------------------------|----------|--------------------|----------------|------------------|------------------|--------------------|-------|--------------|--------|
| PELMO 5.5.3<br>/sunflowers | Scenario | IN-R9805<br>(µg/L) |                |                  |                  | IN-00581<br>(µg/L) |       | M2<br>(µg/L) |        |
|                            |          | pH<7<br>(ff=1)     | pH>7<br>(ff=1) | pH<7<br>(ff=0.5) | pH>7<br>(ff=0.5) | pH<7               | pH>7  | pH<7         | pH>7   |
|                            | Piacenza | 0.212              | 0.287          | 0.101            | 0.137            | 0.145              | 0.311 | <0.001       | 0.045  |
|                            | Sevilla  | 0.022              | 0.049          | 0.009            | 0.022            | 0.013              | 0.043 | <0.001       | <0.001 |

| DPX-L5300          |          |                  |       |                                   |                    |       |                    |       |
|--------------------|----------|------------------|-------|-----------------------------------|--------------------|-------|--------------------|-------|
| PEARL 4.4.4/olives | Scenario | Parent<br>(µg/L) |       |                                   | IN-L5296<br>(µg/L) |       | IN-A4098<br>(µg/L) |       |
|                    |          | pH<7             | pH>7  | pH>7<br>Field<br>DT <sub>50</sub> | pH<7               | pH>7  | pH<7               | pH>7  |
|                    | Piacenza | <0.001           | 0.168 | <0.001                            | 0.166              | 0.568 | 0.585              | 0.763 |
|                    | Porto    | <0.001           | 0.096 | <0.001                            | 0.063              | 0.152 | 0.238              | 0.272 |
|                    | Sevilla  | <0.001           | 0.142 | <0.001                            | 0.148              | 0.370 | 0.679              | 0.803 |
|                    | Thiva    | <0.001           | 0.071 | <0.001                            | 0.160              | 0.362 | 0.773              | 0.924 |

| DPX-L5300 |  |  |  |  |  |  |  |  |
|-----------|--|--|--|--|--|--|--|--|
|-----------|--|--|--|--|--|--|--|--|

|  | Scenario | IN-R9805<br>(µg/L) |                |                  |                  | IN-00581<br>(µg/L) |       | M2<br>(µg/L) |       |
|--|----------|--------------------|----------------|------------------|------------------|--------------------|-------|--------------|-------|
|  |          | pH<7<br>(ff=1)     | pH>7<br>(ff=1) | pH<7<br>(ff=0.5) | pH>7<br>(ff=0.5) | pH<7               | pH>7  | pH<7         | pH>7  |
|  | Piacenza | 0.282              | 0.441          | 0.134            | 0.213            | 0.096              | 0.296 | <0.001       | 0.048 |
|  | Porto    | 0.130              | 0.162          | 0.061            | 0.077            | 0.060              | 0.156 | <0.001       | 0.010 |
|  | Sevilla  | 0.274              | 0.446          | 0.127            | 0.212            | 0.095              | 0.310 | <0.001       | 0.019 |
|  | Thiva    | 0.337              | 0.465          | 0.158            | 0.221            | 0.052              | 0.178 | <0.001       | 0.011 |

| PELMO 5.5.3/olives | DPX-L5300 |                  |       |                                   |                    |       |                    |       |
|--------------------|-----------|------------------|-------|-----------------------------------|--------------------|-------|--------------------|-------|
|                    | Scenario  | Parent<br>(µg/L) |       |                                   | IN-L5296<br>(µg/L) |       | IN-A4098<br>(µg/L) |       |
|                    |           | pH<7             | pH>7  | pH>7<br>Field<br>DT <sub>50</sub> | pH<7               | pH>7  | pH<7               | pH>7  |
|                    | Piacenza  | 0.001            | 0.412 | 0.018                             | 0.156              | 0.460 | 0.419              | 0.423 |
|                    | Porto     | <0.001           | 0.240 | 0.006                             | 0.089              | 0.200 | 0.266              | 0.293 |
|                    | Sevilla   | <0.001           | 0.344 | 0.018                             | 0.087              | 0.465 | 0.655              | 0.969 |
|                    | Thiva     | <0.001           | 0.109 | <0.001                            | 0.164              | 0.526 | 0.684              | 0.990 |

| PELMO 5.5.3/olives | DPX-L5300 |                    |                |                  |                  |                    |       |              |       |
|--------------------|-----------|--------------------|----------------|------------------|------------------|--------------------|-------|--------------|-------|
|                    | Scenario  | IN-R9805<br>(µg/L) |                |                  |                  | IN-00581<br>(µg/L) |       | M2<br>(µg/L) |       |
|                    |           | pH<7<br>(ff=1)     | pH>7<br>(ff=1) | pH<7<br>(ff=0.5) | pH>7<br>(ff=0.5) | pH<7               | pH>7  | pH<7         | pH>7  |
|                    | Piacenza  | 0.225              | 0.276          | 0.107            | 0.133            | 0.202              | 0.354 | 0.001        | 0.074 |
|                    | Porto     | 0.144              | 0.180          | 0.068            | 0.086            | 0.115              | 0.266 | <0.001       | 0.021 |
|                    | Sevilla   | 0.250              | 0.501          | 0.115            | 0.239            | 0.113              | 0.322 | <0.001       | 0.014 |
|                    | Thiva     | 0.311              | 0.521          | 0.146            | 0.247            | 0.067              | 0.227 | <0.001       | 0.015 |

Method of calculation and type of study (Groundwater modelling)

### Tribenuron-methyl in CHA6310

Metabolites: IN-L5296, IN-A4098, IN-00581, IN-R9805, IN-D5803, M2, IN-D5119, IN-GK521, IN-GN815 and IN-D5803

FOCUS Models used: PEARL 4.4.4 and PELMO 5.5.3  
 Crop: winter and spring cereals  
 Crop uptake factor: 0 for parent and 0 for all metabolites

Standard calculations for parent and metabolites. pH dependency for DegT<sub>50</sub> and K<sub>foc</sub> in soil for parent has been taken into account in the modelling.

All DT<sub>50s</sub> normalised with regard to temperature (Q<sub>10</sub>=2.58) and to moisture (Walker exponent 0.7).

#### Tribenuron-methyl

Geometric mean lab DT<sub>50</sub> (standard calc.): 5.3 days (pH <7), 16.7 days (pH >7), 3.6 days (field)  
 Arithmetic mean K<sub>foc</sub> (mL/g): 38.9 (pH <7), 8.6 (pH >7)  
 1/n= 0.98 (pH <7), 1.0 (pH >7)  
 Water solubility (mg/L): 2483 at pH 7 and 20°C  
 Vapour pressure: 5.99 x 10<sup>-9</sup> Pa at 25°C

#### IN-L5296

Geometric mean lab DT<sub>50</sub> : 207.5 d  
 Arithmetic mean K<sub>foc</sub> (mL/g): 82.6 \*  
 1/n= 0.80  
 parent → IN-L5296, ff= 0.8\*\*  
 Water solubility (mg/L): 2483 at pH 7 and 20°C  
 Vapour pressure: 0  
 \* the correct arithmetic mean K<sub>FOC</sub> that should be used is 89.4 mL/g, however there is no impact on the PECs calculated  
 \*\*the correct ff that should be used is 0.76, however it is unlikely that this deficiency has an impact on the groundwater exposure assessment for this metabolite.

#### IN-A4098

Geometric mean lab DT<sub>50</sub> : 127.7 d  
 Arithmetic mean K<sub>foc</sub> (mL/g): 41.6\*  
 1/n= 0.91  
 IN-L5296 → IN-4098, ff= 1.0  
 Water solubility (mg/L): 456 at pH 7 and 20°C  
 Vapour pressure: 1.9 x 10<sup>-4</sup> Pa at 25°C  
 \* the correct arithmetic mean K<sub>FOC</sub> that should be used is 71.1 mL/g, however there is no impact on the groundwater exposure assessment for this metabolite.

#### IN-00581

Geometric mean lab DT<sub>50</sub> : 20,5 d\*  
 Arithmetic mean K<sub>foc</sub> (mL/g): 5.6 \*\*  
 1/n= 0.9  
 IN-D5803 → IN-00581, ff= 1.0  
 Water solubility (mg/L): 2483 at pH 7 and 20°C  
 Vapour pressure: 0  
 \* the correct geometric mean lab DT<sub>50</sub> that should be used is 19.1d; \*\* the correct arithmetic mean K<sub>FOC</sub> that should be used is 7.2 mL/g, however there is no impact on the groundwater exposure assessment for this metabolite.

#### IN-R9805

Geometric mean lab DT<sub>50</sub> : 85.5 d  
 Arithmetic mean K<sub>foc</sub> (mL/g): 105\*  
 1/n= 0.93\*  
 IN-L5296 → IN-R9805, ff=1.0  
 IN-GK521 → IN-R9805, ff= 0.81  
 IN-R9803 → IN-R9805, ff=1.0  
 Water solubility (mg/L): 2483 at pH 7 and 20°C

Application rate

|                                                                                                                                                                                                                                                                                                                                                                                                                                                                                                                                                                                                                                                                                                                                                                                                                                                                                                                                                                                                                                                                                                                                                                                                                                                                                                                                                                                                                                                                                                                                                                                                                                                                                                                                                                                                                                                                                                                                                                                                                                                                                                                                                                                                                                                                                                                                                                                                                                                                                                      |                                                                                                                                                                                                                                                                                                                                                                                                                                                                                                                                                                                                                                                                                                                                                                                                                                                                                                                                                                                                                                                    |
|------------------------------------------------------------------------------------------------------------------------------------------------------------------------------------------------------------------------------------------------------------------------------------------------------------------------------------------------------------------------------------------------------------------------------------------------------------------------------------------------------------------------------------------------------------------------------------------------------------------------------------------------------------------------------------------------------------------------------------------------------------------------------------------------------------------------------------------------------------------------------------------------------------------------------------------------------------------------------------------------------------------------------------------------------------------------------------------------------------------------------------------------------------------------------------------------------------------------------------------------------------------------------------------------------------------------------------------------------------------------------------------------------------------------------------------------------------------------------------------------------------------------------------------------------------------------------------------------------------------------------------------------------------------------------------------------------------------------------------------------------------------------------------------------------------------------------------------------------------------------------------------------------------------------------------------------------------------------------------------------------------------------------------------------------------------------------------------------------------------------------------------------------------------------------------------------------------------------------------------------------------------------------------------------------------------------------------------------------------------------------------------------------------------------------------------------------------------------------------------------------|----------------------------------------------------------------------------------------------------------------------------------------------------------------------------------------------------------------------------------------------------------------------------------------------------------------------------------------------------------------------------------------------------------------------------------------------------------------------------------------------------------------------------------------------------------------------------------------------------------------------------------------------------------------------------------------------------------------------------------------------------------------------------------------------------------------------------------------------------------------------------------------------------------------------------------------------------------------------------------------------------------------------------------------------------|
| <p>Vapour pressure: 0<br/>         *The correct geometric mean adsorption values that should be used are <math>K_{foc}</math> (mL/g) 72.3 <math>1/n=0.939</math>.<br/> <u>M2</u><br/>         Geometric mean lab <math>DT_{50}</math> : 14.3 d*<br/>         Arithmetic mean <math>K_{foc}</math> (mL/g): 97.7**<br/> <math>1/n=0.87</math>***<br/>         parent → M2, <math>ff=1.0</math> (or 1-0.8 from IN-L5296) ****<br/>         Water solubility (mg/L): 2483 at pH 7 and 20°C<br/>         Vapour pressure: 0<br/>         * the correct geometric mean lab <math>DT_{50}</math> that should be used is 21.5d; ** the correct arithmetic mean <math>K_{FOC}</math> that should be used is 78.3 mL/g; *** the correct <math>1/n</math> that should be used is 0.86, **** the correct <math>ff</math> that should be used is 0.24. Based on the PECgw values available, it is difficult to predict if these deficiencies can have an impact on final exposure groundwater assessment for metabolite M2 for the representative use on winter cereals (autumn application) applied for tribenuron-methyl in CHA6310 as some of the available PECgw values are already approaching the trigger of 0.1 µg/L. Therefore, a <b>data gap</b> has been identified for FOCUS GW modelling for metabolite M2 for the representative use on winter cereals (autumn application).</p> <p><u>IN-GK521 (anaerobic metabolite)</u><br/>         Geometric mean lab <math>DT_{50}</math> : 13.4 d*<br/>         Arithmetic mean <math>K_{foc}</math> (mL/g): 16.8**<br/> <math>1/n=1</math><br/>         parent→ IN-GK521, <math>ff=0.23</math> (anaerobic)<br/>         Water solubility (mg/L): 2483 at pH 7 and 20°C<br/>         Vapour pressure: 0<br/>         * the correct geometric mean lab <math>DT_{50}</math> (anaerobic) that should be used is 67.1d; ** the correct arithmetic mean <math>K_{FOC}</math> that should be used is 17.4 mL/g. Based on the PECgw values available, it is difficult to predict if these deficiencies can have an impact on final exposure groundwater assessment for metabolite IN-GK521 for the representative use on winter cereals (autumn application) applied for tribenuron-methyl in CHA6310 as some of the available PECgw values are already approaching the trigger of 0.1 µg/L. Therefore, a <b>data gap</b> has been identified for FOCUS GW modelling for metabolite IN-GK521 for the representative use on winter cereals (autumn application).</p> | <p><u>Winter cereals</u><br/>         Gross application rate: 15 g/ha.<br/>         Crop growth stage: BBCH 12-29 (autumn application)<br/>         Canopy interception 25%:<br/>         Application rate net of interception: 11.25 g/ha.<br/>         No. of applications:1<br/>         Time of application (relative application dates): 14 days post emergence for all scenarios.</p> <p><u>Winter cereals</u><br/>         Gross application rate: 30 g/ha.<br/>         Crop growth stage: BBCH 12-39 (spring application)<br/>         Canopy interception 25%:<br/>         Application rate net of interception: 22.5 g/ha.<br/>         No. of applications:1<br/>         Time of application (absolute application dates): 7 days before spring point for all scenarios.</p> <p><u>Spring cereals</u><br/>         Gross application rate: 30 g/ha.<br/>         Crop growth stage: 12-39<br/>         Canopy interception 25%:<br/>         Application rate net of interception: 22.5 g/ha.<br/>         No. of applications:1</p> |
|------------------------------------------------------------------------------------------------------------------------------------------------------------------------------------------------------------------------------------------------------------------------------------------------------------------------------------------------------------------------------------------------------------------------------------------------------------------------------------------------------------------------------------------------------------------------------------------------------------------------------------------------------------------------------------------------------------------------------------------------------------------------------------------------------------------------------------------------------------------------------------------------------------------------------------------------------------------------------------------------------------------------------------------------------------------------------------------------------------------------------------------------------------------------------------------------------------------------------------------------------------------------------------------------------------------------------------------------------------------------------------------------------------------------------------------------------------------------------------------------------------------------------------------------------------------------------------------------------------------------------------------------------------------------------------------------------------------------------------------------------------------------------------------------------------------------------------------------------------------------------------------------------------------------------------------------------------------------------------------------------------------------------------------------------------------------------------------------------------------------------------------------------------------------------------------------------------------------------------------------------------------------------------------------------------------------------------------------------------------------------------------------------------------------------------------------------------------------------------------------------|----------------------------------------------------------------------------------------------------------------------------------------------------------------------------------------------------------------------------------------------------------------------------------------------------------------------------------------------------------------------------------------------------------------------------------------------------------------------------------------------------------------------------------------------------------------------------------------------------------------------------------------------------------------------------------------------------------------------------------------------------------------------------------------------------------------------------------------------------------------------------------------------------------------------------------------------------------------------------------------------------------------------------------------------------|

Time of application (relative application dates): 14 days post emergence for all scenarios.

| PEARL 4.4.4 /winter cereals (autumn application) | CHA6310  |               |        |                         |                   |        |          |        |          |        |
|--------------------------------------------------|----------|---------------|--------|-------------------------|-------------------|--------|----------|--------|----------|--------|
|                                                  | Scenario | Parent (µg/L) |        |                         | Metabolite (µg/L) |        |          |        |          |        |
|                                                  |          | < pH 7        | > pH 7 | > pH 7<br>DT50<br>Field | IN-L5296          |        | IN-00581 |        | IN-A4098 |        |
|                                                  |          |               |        |                         | < pH 7            | > pH 7 | < pH 7   | > pH 7 | < pH 7   | > pH 7 |
| Chateaudun                                       | 0.00     | 0.21          | 0.00   | 0.02                    | 0.21              | 0.11   | 0.25     | 0.35   | 0.50     |        |
| Hamburg                                          | 0.00     | 0.91          | 0.07   | 0.11                    | 0.37              | 0.36   | 0.55     | 0.47   | 0.42     |        |
| Jokioinen                                        | 0.00     | 1.30          | 0.08   | 0.03                    | 0.23              | 0.41   | 0.88     | 0.41   | 0.42     |        |
| Kremsmunster                                     | 0.00     | 0.41          | 0.01   | 0.06                    | 0.28              | 0.18   | 0.34     | 0.33   | 0.32     |        |
| Okehampton                                       | 0.00     | 0.68          | 0.04   | 0.08                    | 0.21              | 0.31   | 0.37     | 0.31   | 0.23     |        |
| Piacenza                                         | 0.00     | 0.24          | 0.02   | 0.07                    | 0.24              | 0.11   | 0.21     | 0.30   | 0.39     |        |
| Porto                                            | 0.00     | 0.53          | 0.06   | 0.04                    | 0.11              | 0.21   | 0.23     | 0.25   | 0.26     |        |
| Sevilla                                          | 0.00     | 0.00          | 0.00   | 0.00                    | 0.01              | 0.00   | 0.00     | 0.05   | 0.11     |        |
| Thiva                                            | 0.00     | 0.05          | 0.00   | 0.02                    | 0.15              | 0.03   | 0.09     | 0.44   | 0.67     |        |

| PEARL 4.4.4 /winter cereals (autumn application) | CHA6310  |                            |                       |
|--------------------------------------------------|----------|----------------------------|-----------------------|
|                                                  | Scenario | Metabolite IN-D5803 (µg/L) |                       |
|                                                  |          | < pH 7                     | > pH 7<br>(DT50 18 d) |
| Chateaudun                                       | 0.00     | 0.02                       |                       |
| Hamburg                                          | 0.00     | 0.07                       |                       |
| Jokioinen                                        | 0.00     | 0.07                       |                       |
| Kremsmunster                                     | 0.00     | 0.03                       |                       |
| Okehampton                                       | 0.00     | 0.05                       |                       |
| Piacenza                                         | 0.00     | 0.02                       |                       |
| Porto                                            | 0.00     | 0.03                       |                       |
| Sevilla                                          | 0.00     | 0.00                       |                       |
| Thiva                                            | 0.00     | 0.00                       |                       |

| PELMO 5.5.3/Winter cereals (autumn application) | CHA6310  |               |        |                         |                   |        |          |        |          |        |
|-------------------------------------------------|----------|---------------|--------|-------------------------|-------------------|--------|----------|--------|----------|--------|
|                                                 | Scenario | Parent (µg/L) |        |                         | Metabolite (µg/L) |        |          |        |          |        |
|                                                 |          | < pH 7        | > pH 7 | > pH 7<br>DT50<br>Field | IN-L5296          |        | IN-00581 |        | IN-A4098 |        |
|                                                 |          |               |        |                         | < pH 7            | > pH 7 | < pH 7   | > pH 7 | < pH 7   | > pH 7 |
| Chateaudun                                      | 0.00     | 0.17          | 0.01   | 0.01                    | 0.20              | 0.09   | 0.21     | 0.33   | 0.48     |        |
| Hamburg                                         | 0.01     | 1.27          | 0.17   | 0.12                    | 0.35              | 0.43   | 0.65     | 0.51   | 0.35     |        |
| Jokioinen                                       | 0.00     | 1.45          | 0.22   | 0.03                    | 0.20              | 0.51   | 0.85     | 0.43   | 0.40     |        |
| Kremsmunster                                    | 0.00     | 0.48          | 0.04   | 0.08                    | 0.33              | 0.20   | 0.42     | 0.40   | 0.37     |        |
| Okehampton                                      | 0.01     | 0.82          | 0.07   | 0.09                    | 0.21              | 0.38   | 0.38     | 0.33   | 0.23     |        |
| Piacenza                                        | 0.00     | 0.58          | 0.09   | 0.08                    | 0.27              | 0.19   | 0.26     | 0.41   | 0.45     |        |
| Porto                                           | 0.02     | 0.80          | 0.17   | 0.06                    | 0.09              | 0.32   | 0.24     | 0.26   | 0.21     |        |
| Sevilla                                         | 0.00     | 0.04          | 0.01   | 0.00                    | 0.02              | 0.01   | 0.02     | 0.11   | 0.18     |        |
| Thiva                                           | 0.00     | 0.08          | 0.01   | 0.01                    | 0.12              | 0.04   | 0.10     | 0.31   | 0.49     |        |

| PELMO<br>5.5.3/Wint<br>or cereals | CHA6310  |                            |                       |
|-----------------------------------|----------|----------------------------|-----------------------|
|                                   | Scenario | Metabolite IN-D5803 (µg/L) |                       |
|                                   |          | < pH 7                     | > pH 7<br>(DT50 18 d) |
|                                   |          |                            |                       |



|  |              |      |      |
|--|--------------|------|------|
|  | Chateaudun   | 0.00 | 0.01 |
|  | Hamburg      | 0.00 | 0.07 |
|  | Jokioinen    | 0.01 | 0.06 |
|  | Kremsmunster | 0.00 | 0.04 |
|  | Okehampton   | 0.00 | 0.05 |
|  | Piacenza     | 0.00 | 0.03 |
|  | Porto        | 0.01 | 0.03 |
|  | Sevilla      | 0.00 | 0.00 |
|  | Thiva        | 0.00 | 0.01 |

| PEARL 4.4.4 /winter cereals (spring application) | CHA6310  |               |        |                   |                   |        |          |        |          |        |
|--------------------------------------------------|----------|---------------|--------|-------------------|-------------------|--------|----------|--------|----------|--------|
|                                                  | Scenario | Parent (µg/L) |        |                   | Metabolite (µg/L) |        |          |        |          |        |
|                                                  |          |               |        |                   | IN-L5296          |        | IN-00581 |        | IN-A4098 |        |
|                                                  |          | < pH 7        | > pH 7 | > pH 7 DT50 Field | < pH 7            | > pH 7 | < pH 7   | > pH 7 | < pH 7   | > pH 7 |
| Chateaudun                                       | 0.00     | 0.09          | 0.00   | 0.04              | 0.18              | 0.10   | 0.21     | 0.70   | 0.86     |        |
| Hamburg                                          | 0.00     | 0.54          | 0.00   | 0.17              | 0.37              | 0.48   | 0.75     | 0.93   | 0.94     |        |
| Jokioinen                                        | 0.00     | 0.50          | 0.00   | 0.04              | 0.18              | 0.42   | 0.81     | 0.81   | 0.93     |        |
| Kremsmunster                                     | 0.00     | 0.34          | 0.00   | 0.12              | 0.37              | 0.27   | 0.48     | 0.67   | 0.67     |        |
| Okehampton                                       | 0.00     | 0.38          | 0.00   | 0.16              | 0.37              | 0.31   | 0.52     | 0.63   | 0.59     |        |
| Piacenza                                         | 0.00     | 0.18          | 0.00   | 0.10              | 0.32              | 0.15   | 0.27     | 0.61   | 0.82     |        |
| Porto                                            | 0.00     | 0.17          | 0.00   | 0.08              | 0.22              | 0.10   | 0.25     | 0.49   | 0.56     |        |
| Sevilla                                          | 0.00     | 0.00          | 0.00   | 0.00              | 0.00              | 0.00   | 0.01     | 0.09   | 0.12     |        |
| Thiva                                            | 0.00     | 0.01          | 0.00   | 0.03              | 0.09              | 0.01   | 0.05     | 0.88   | 1.07     |        |

| PEARL 4.4.4 /winter cereals (spring application) | CHA6310  |                   |               |                 |                 |        |               |                 |          |        |
|--------------------------------------------------|----------|-------------------|---------------|-----------------|-----------------|--------|---------------|-----------------|----------|--------|
|                                                  | Scenario | Metabolite (µg/L) |               |                 |                 |        |               |                 |          |        |
|                                                  |          | IN-R9805          |               |                 |                 | M2     |               |                 | IN-GK521 |        |
|                                                  |          | < pH 7 (ff=1)     | > pH 7 (ff=1) | < pH 7 (ff=0.5) | > pH 7 (ff=0.5) | < pH 7 | > pH 7 (ff=1) | > pH 7 (ff=0.2) | < pH 7   | > pH 7 |
| Chateaudun                                       | 0.13     | 0.24              | 0.06          | 0.11            | 0.00            | 0.01   | 0.00          | 0.00            | 0.02     |        |
| Hamburg                                          | 0.27     | 0.32              | 0.13          | 0.15            | 0.00            | 0.06   | 0.01          | 0.03            | 0.09     |        |
| Jokioinen                                        | 0.15     | 0.24              | 0.07          | 0.11            | 0.00            | 0.02   | 0.00          | 0.02            | 0.08     |        |
| Kremsmunster                                     | 0.20     | 0.27              | 0.10          | 0.13            | 0.00            | 0.05   | 0.01          | 0.02            | 0.06     |        |
| Okehampton                                       | 0.23     | 0.26              | 0.11          | 0.13            | 0.00            | 0.06   | 0.01          | 0.02            | 0.07     |        |
| Piacenza                                         | 0.18     | 0.28              | 0.08          | 0.13            | 0.00            | 0.03   | 0.01          | 0.01            | 0.03     |        |
| Porto                                            | 0.15     | 0.21              | 0.07          | 0.10            | 0.00            | 0.01   | 0.00          | 0.01            | 0.03     |        |
| Sevilla                                          | 0.00     | 0.01              | 0.00          | 0.00            | 0.00            | 0.00   | 0.00          | 0.00            | 0.00     |        |
| Thiva                                            | 0.11     | 0.18              | 0.05          | 0.08            | 0.00            | 0.00   | 0.00          | 0.00            | 0.00     |        |

| PEARL 4.4.4 /winter cereals (spring application) | CHA6310  |                 |                    |
|--------------------------------------------------|----------|-----------------|--------------------|
|                                                  | Scenario | IN-D5803 (µg/L) |                    |
|                                                  |          | < pH 7          | > pH 7 (DT50 18 d) |
| Chateaudun                                       | 0.00     | 0.01            |                    |
| Hamburg                                          | 0.00     | 0.05            |                    |
| Jokioinen                                        | 0.00     | 0.03            |                    |
| Kremsmunster                                     | 0.00     | 0.03            |                    |
| Okehampton                                       | 0.00     | 0.04            |                    |
| Piacenza                                         | 0.00     | 0.02            |                    |
| Porto                                            | 0.00     | 0.01            |                    |
| Sevilla                                          | 0.00     | 0.00            |                    |
| Thiva                                            | 0.00     | 0.00            |                    |

| P | CHA6310  |        |                   |
|---|----------|--------|-------------------|
|   | Scenario | Parent | Metabolite (µg/L) |

|              |  | (µg/L) |        |                      | IN-L5296 |        | IN-00581 |        | IN-A4098 |        |
|--------------|--|--------|--------|----------------------|----------|--------|----------|--------|----------|--------|
|              |  | < pH 7 | > pH 7 | > pH 7<br>DT50 Field | < pH 7   | > pH 7 | < pH 7   | > pH 7 | < pH 7   | > pH 7 |
| Chateaudun   |  | 0.00   | 0.06   | 0.00                 | 0.03     | 0.13   | 0.06     | 0.17   | 0.68     | 0.87   |
| Hamburg      |  | 0.00   | 0.30   | 0.00                 | 0.18     | 0.36   | 0.27     | 0.53   | 0.99     | 1.03   |
| Jokioinen    |  | 0.00   | 0.47   | 0.00                 | 0.04     | 0.18   | 0.39     | 0.76   | 0.86     | 0.96   |
| Kremsmunster |  | 0.00   | 0.40   | 0.00                 | 0.14     | 0.44   | 0.29     | 0.54   | 0.77     | 0.81   |
| Okehampton   |  | 0.00   | 0.42   | 0.00                 | 0.17     | 0.40   | 0.30     | 0.50   | 0.66     | 0.62   |
| Piacenza     |  | 0.00   | 0.29   | 0.00                 | 0.13     | 0.44   | 0.08     | 0.37   | 0.80     | 0.91   |
| Porto        |  | 0.00   | 0.14   | 0.00                 | 0.10     | 0.22   | 0.07     | 0.21   | 0.53     | 0.56   |
| Sevilla      |  | 0.00   | 0.00   | 0.00                 | 0.00     | 0.00   | 0.01     | 0.01   | 0.23     | 0.26   |
| Thiva        |  | 0.00   | 0.01   | 0.00                 | 0.01     | 0.02   | 0.00     | 0.02   | 0.57     | 0.67   |

| PELMO 5.5.3/winter cereals (spring application) | CHA6310  |                   |                  |                    |                    |        |                  |                    |          |      |  |        |
|-------------------------------------------------|----------|-------------------|------------------|--------------------|--------------------|--------|------------------|--------------------|----------|------|--|--------|
|                                                 | Scenario | Metabolite (µg/L) |                  |                    |                    |        |                  |                    |          |      |  |        |
|                                                 |          | IN-R9805          |                  |                    |                    | M2     |                  |                    | IN-GK521 |      |  |        |
|                                                 |          | < pH 7<br>(ff=1)  | > pH 7<br>(ff=1) | < pH 7<br>(ff=0.5) | > pH 7<br>(ff=0.5) | < pH 7 | > pH 7<br>(ff=1) | > pH 7<br>(ff=0.2) | < pH 7   |      |  | > pH 7 |
| Chateaudun                                      | 0.11     | 0.22              | 0.05             | 0.10               | 0.00               | 0.00   | 0.00             | 0.00               | 0.00     | 0.02 |  |        |
| Hamburg                                         | 0.31     | 0.37              | 0.15             | 0.18               | 0.00               | 0.02   | 0.01             | 0.02               | 0.02     | 0.06 |  |        |
| Jokioinen                                       | 0.17     | 0.25              | 0.08             | 0.12               | 0.00               | 0.02   | 0.00             | 0.03               | 0.03     | 0.08 |  |        |
| Kremsmunster                                    | 0.23     | 0.31              | 0.11             | 0.15               | 0.00               | 0.05   | 0.01             | 0.02               | 0.02     | 0.07 |  |        |
| Okehampton                                      | 0.25     | 0.28              | 0.12             | 0.14               | 0.00               | 0.05   | 0.01             | 0.02               | 0.02     | 0.07 |  |        |
| Piacenza                                        | 0.22     | 0.33              | 0.10             | 0.16               | 0.00               | 0.04   | 0.01             | 0.01               | 0.01     | 0.04 |  |        |
| Porto                                           | 0.18     | 0.22              | 0.08             | 0.10               | 0.00               | 0.01   | 0.00             | 0.01               | 0.01     | 0.03 |  |        |
| Sevilla                                         | 0.00     | 0.01              | 0.00             | 0.00               | 0.00               | 0.00   | 0.00             | 0.00               | 0.00     | 0.00 |  |        |
| Thiva                                           | 0.06     | 0.09              | 0.03             | 0.04               | 0.00               | 0.00   | 0.00             | 0.00               | 0.00     | 0.00 |  |        |

| PELMO 5.5.3/winter cereals (spring application) | CHA6310  |                 |                       |
|-------------------------------------------------|----------|-----------------|-----------------------|
|                                                 | Scenario | IN-D5803 (µg/L) |                       |
|                                                 |          | < pH 7          | > pH 7<br>(DT50 18 d) |
| Chateaudun                                      | 0.00     | 0.01            |                       |
| Hamburg                                         | 0.00     | 0.03            |                       |
| Jokioinen                                       | 0.00     | 0.02            |                       |
| Kremsmunster                                    | 0.00     | 0.04            |                       |
| Okehampton                                      | 0.00     | 0.04            |                       |
| Piacenza                                        | 0.00     | 0.01            |                       |
| Porto                                           | 0.00     | 0.01            |                       |
| Sevilla                                         | 0.00     | 0.00            |                       |
| Thiva                                           | 0.00     | 0.00            |                       |

| PEARL 4.4.4/Spring cereals | CHA6310  |               |        |                      |        |          |        |          |        |  |  |
|----------------------------|----------|---------------|--------|----------------------|--------|----------|--------|----------|--------|--|--|
|                            | Scenario | Parent (µg/L) |        | Metabolite (µg/L)    |        |          |        |          |        |  |  |
|                            |          |               |        | IN-L5296             |        | IN-00581 |        | IN-A4098 |        |  |  |
|                            |          | < pH 7        | > pH 7 | > pH 7<br>DT50 Field | < pH 7 | > pH 7   | < pH 7 | > pH 7   | < pH 7 |  |  |
| Chateaudun                 | 0.00     | 0.07          | 0.00   | 0.04                 | 0.15   | 0.08     | 0.18   | 0.61     | 0.77   |  |  |
| Hamburg                    | 0.00     | 0.59          | 0.00   | 0.20                 | 0.41   | 0.54     | 0.89   | 1.18     | 1.20   |  |  |
| Jokioinen                  | 0.00     | 0.55          | 0.00   | 0.03                 | 0.18   | 0.43     | 0.80   | 0.72     | 0.81   |  |  |
| Kremsmunster               | 0.00     | 0.36          | 0.00   | 0.13                 | 0.39   | 0.27     | 0.50   | 0.74     | 0.75   |  |  |
| Okehampton                 | 0.00     | 0.32          | 0.00   | 0.15                 | 0.38   | 0.26     | 0.46   | 0.66     | 0.62   |  |  |
| Porto                      | 0.00     | 0.05          | 0.00   | 0.07                 | 0.13   | 0.05     | 0.12   | 0.45     | 0.49   |  |  |

| P | CHA6310  |                   |
|---|----------|-------------------|
|   | Scenario | Metabolite (µg/L) |
|   |          |                   |

|  |              | IN-R9805         |                  |                    |                    | M2     |                  |                    | IN-GK521 |        |
|--|--------------|------------------|------------------|--------------------|--------------------|--------|------------------|--------------------|----------|--------|
|  |              | < pH 7<br>(ff=1) | > pH 7<br>(ff=1) | < pH 7<br>(ff=0.5) | > pH 7<br>(ff=0.5) | < pH 7 | > pH 7<br>(ff=1) | > pH 7<br>(ff=0.2) | < pH 7   | > pH 7 |
|  | Chateaudun   | 0.11             | 0.21             | 0.05               | 0.10               | 0.00   | 0.00             | 0.00               | 0.00     | 0.02   |
|  | Hamburg      | 0.31             | 0.40             | 0.15               | 0.19               | 0.00   | 0.07             | 0.01               | 0.04     | 0.11   |
|  | Jokioinen    | 0.14             | 0.22             | 0.06               | 0.11               | 0.00   | 0.03             | 0.00               | 0.03     | 0.09   |
|  | Kremsmunster | 0.22             | 0.30             | 0.10               | 0.14               | 0.00   | 0.04             | 0.01               | 0.02     | 0.06   |
|  | Okehampton   | 0.23             | 0.28             | 0.11               | 0.13               | 0.00   | 0.04             | 0.01               | 0.02     | 0.06   |
|  | Porto        | 0.15             | 0.18             | 0.07               | 0.09               | 0.00   | 0.00             | 0.00               | 0.00     | 0.01   |

| PEARL 4.4.4 / Spring cereals | CHA6310      |                    |                       |
|------------------------------|--------------|--------------------|-----------------------|
|                              | Scenario     | IN-D5803<br>(µg/L) |                       |
|                              |              | < pH 7             | > pH 7<br>(DT50 18 d) |
|                              | Chateaudun   | 0.00               | 0.01                  |
|                              | Hamburg      | 0.00               | 0.05                  |
|                              | Jokioinen    | 0.00               | 0.03                  |
|                              | Kremsmunster | 0.00               | 0.04                  |
|                              | Okehampton   | 0.00               | 0.03                  |
|                              | Porto        | 0.00               | 0.00                  |

| PELMO 5.5.3/ Spring cereals | CHA6310      |                  |        |                      |                   |        |          |        |          |        |
|-----------------------------|--------------|------------------|--------|----------------------|-------------------|--------|----------|--------|----------|--------|
|                             | Scenario     | Parent<br>(µg/L) |        |                      | Metabolite (µg/L) |        |          |        |          |        |
|                             |              | < pH 7           |        | > pH 7<br>DT50 Field | IN-L5296          |        | IN-00581 |        | IN-A4098 |        |
|                             |              | < pH 7           | > pH 7 |                      | < pH 7            | > pH 7 | < pH 7   | > pH 7 | < pH 7   | > pH 7 |
|                             | Chateaudun   | 0.00             | 0.05   | 0.00                 | 0.02              | 0.11   | 0.05     | 0.12   | 0.55     | 0.70   |
|                             | Hamburg      | 0.00             | 0.23   | 0.00                 | 0.16              | 0.29   | 0.25     | 0.48   | 0.94     | 0.97   |
|                             | Jokioinen    | 0.00             | 0.52   | 0.00                 | 0.03              | 0.14   | 0.42     | 0.70   | 0.68     | 0.73   |
|                             | Kremsmunster | 0.00             | 0.33   | 0.00                 | 0.12              | 0.40   | 0.28     | 0.53   | 0.73     | 0.77   |
|                             | Okehampton   | 0.00             | 0.34   | 0.00                 | 0.14              | 0.34   | 0.26     | 0.47   | 0.62     | 0.58   |
|                             | Porto        | 0.00             | 0.09   | 0.00                 | 0.09              | 0.16   | 0.08     | 0.16   | 0.46     | 0.49   |

| PELMO 5.5.3/ Spring cereals | CHA6310          |                   |                    |                    |        |                  |                    |        |          |      |
|-----------------------------|------------------|-------------------|--------------------|--------------------|--------|------------------|--------------------|--------|----------|------|
|                             | Scenario         | Metabolite (µg/L) |                    |                    |        |                  |                    |        |          |      |
|                             |                  | IN-R9805          |                    |                    |        | M2               |                    |        | IN-GK521 |      |
|                             | < pH 7<br>(ff=1) | > pH 7<br>(ff=1)  | < pH 7<br>(ff=0.5) | > pH 7<br>(ff=0.5) | < pH 7 | > pH 7<br>(ff=1) | > pH 7<br>(ff=0.2) | < pH 7 | > pH 7   |      |
|                             | Chateaudun       | 0.09              | 0.17               | 0.04               | 0.08   | 0.00             | 0.00               | 0.00   | 0.00     | 0.01 |
|                             | Hamburg          | 0.27              | 0.33               | 0.13               | 0.16   | 0.00             | 0.02               | 0.00   | 0.01     | 0.05 |
|                             | Jokioinen        | 0.12              | 0.19               | 0.06               | 0.09   | 0.00             | 0.01               | 0.00   | 0.03     | 0.08 |
|                             | Kremsmunster     | 0.21              | 0.30               | 0.10               | 0.14   | 0.00             | 0.04               | 0.01   | 0.02     | 0.06 |
|                             | Okehampton       | 0.22              | 0.27               | 0.11               | 0.13   | 0.00             | 0.03               | 0.01   | 0.02     | 0.06 |
|                             | Porto            | 0.16              | 0.19               | 0.08               | 0.09   | 0.00             | 0.00               | 0.00   | 0.00     | 0.02 |

| PELMO 5.5.3/ Spring cereals | CHA6310      |                    |                       |
|-----------------------------|--------------|--------------------|-----------------------|
|                             | Scenario     | IN-D5803<br>(µg/L) |                       |
|                             |              | < pH 7             | > pH 7<br>(DT50 18 d) |
|                             | Chateaudun   | 0.00               | 0.00                  |
|                             | Hamburg      | 0.00               | 0.02                  |
|                             | Jokioinen    | 0.00               | 0.03                  |
|                             | Kremsmunster | 0.00               | 0.03                  |
|                             | Okehampton   | 0.00               | 0.03                  |

|  |       |      |      |
|--|-------|------|------|
|  | Porto | 0.00 | 0.01 |
|--|-------|------|------|

**PEC(gw) From lysimeter / field studies**

| Parent                | 1st year                                                         | 2nd year | 3rd year |
|-----------------------|------------------------------------------------------------------|----------|----------|
| Annual average (µg/L) | Results not useful for risk assessment; see under Mobility above |          |          |

| Metabolite X          | 1st year                                                         | 2nd year | 3rd year |
|-----------------------|------------------------------------------------------------------|----------|----------|
| Annual average (µg/L) | Results not useful for risk assessment; see under Mobility above |          |          |

**PEC surface water and PEC sediment (Regulation (EU) N° 284/2013, Annex Part A, points 9.2.5 / 9.3.1)**

Tribenuron-methyl in DPX-L5300  
Parameters used in FOCUSsw step 1 and 2

Version control no. of FOCUS calculator: 2.1  
Molecular weight (g/mol): 395.4  
K<sub>foc</sub> (mL/g): 38.9 (pH<7) and 8.6 (pH>7)\*  
Geometric lab DT<sub>50</sub> soil (d): 5.3 (pH<7) and 16.7 (pH>7)  
DT<sub>50</sub> water/sediment system (d): 18.5\*\*  
DT<sub>50</sub> water (d): 18.5\*\*  
DT<sub>50</sub> sediment (d): 1000  
Crop interception (%):  
Sunflowers: minimal crop interception (20%)  
Pasture: full canopy crop interception (75%)  
Winter and spring cereals: average crop interception (50%)  
Olives: no crop interception (0%)

\* The correct arithmetic means that should be used are: K<sub>foc</sub> (mL/g): 46.3 (pH<7) and 9.36 (pH>7), however no impact is expected on the aquatic risk assessment.  
\*\* the correct DT<sub>50</sub> for whole system and water should have been 18.2 days, however no impact is expected on the aquatic risk assessment.

Parameters used in FOCUSsw step 3 (if performed)

Version control no.'s of FOCUS software:  
FOCUS SWASH 3.1, including:  
PRZM 3.1.1  
FOCUS MACRO 5.5.3  
FOCUS TOXSWA 3.3.1  
SWAN 3.0.0  
Water solubility (mg/L): 2483  
Vapour pressure: 5.99 x 10<sup>-9</sup> Pa at 20°C  
K<sub>oc</sub>/K<sub>om</sub> (mL/g): 38.9 (pH<7) and 8.6 (pH>7) \*  
1/n: 0.98 (pH<7) and 1.0 (pH>7)  
Geometric lab DT<sub>50</sub> soil (d): 5.3 (pH<7) and 16.7 (pH>7)  
DT<sub>50</sub> water (d): 18.5  
DT<sub>50</sub> sediment (d): 1000  
Q10=2.58, Walker equation coefficient 0.7  
Crop uptake factor: 0

\* The correct arithmetic means that should be used are: K<sub>foc</sub> (mL/g): 46.3 (pH<7) and 9.36 (pH>7), however no impact is expected on the aquatic risk assessment.

Application rate

Steps 1-2:  
Crop and growth stage:  
Sunflowers BBCH 12-18  
Number of applications: 1  
Interval (d): -  
Application rate(s): 30 g a.s./ha  
Application window: Mar-May

Crop and growth stage:  
pasture BBCH 59 (established grass)  
Number of applications: 1  
Interval (d): -  
Application rate(s): 7.5 g a.s./ha  
Application window: Mar-May

Crop and growth stage:  
winter cereals BBCH 30-39  
Number of applications: 1  
Interval (d): -  
Application rate(s): 24 g a.s./ha  
Application window: Mar-May

Crop and growth stage:  
spring cereals BBCH 30-39

|                                                                                                  |                  |
|--------------------------------------------------------------------------------------------------|------------------|
| Number of applications: 1                                                                        |                  |
| Interval (d): -                                                                                  |                  |
| Application rate(s): 22.5 g a.s./ha                                                              |                  |
| Application window: Mar-May                                                                      |                  |
| Crop and growth stage:<br>Olives Early applications                                              |                  |
| Number of applications: 1                                                                        |                  |
| Interval (d): -                                                                                  |                  |
| Application rate(s): 20 g a.s./ha                                                                |                  |
| Application window: Mar-May                                                                      |                  |
| <u>Step 3</u>                                                                                    |                  |
| Crop and growth stage, number of applications, application rate(s) is the same as for Steps 1-2. |                  |
| Application window:                                                                              |                  |
| Sunflowers                                                                                       |                  |
| D5 (La Jailiere)                                                                                 | 06 May – 05 June |
| R1 (Weiherbach)                                                                                  | 06 May – 05 June |
| R3 (Bologna)                                                                                     | 20 Apr – 20 May  |
| R4 (Roujan)                                                                                      | 04 Apr – 04 May  |
| Pasture                                                                                          |                  |
| D1 (Lanna)                                                                                       | 01 Apr – 31 May  |
| D2 (Brimstone)                                                                                   | 01 Mar – 30 Apr  |
| D3 (Vreedepel)                                                                                   | 01 Mar – 30 Apr  |
| D4 (Skousbo)                                                                                     | 01 Apr – 31 May  |
| D5 (La Jailiere)                                                                                 | 01 Mar – 30 Apr  |
| R2 (Porto)                                                                                       | 01 Mar – 30 Apr  |
| R3 (Bologna)                                                                                     | 01 Mar – 30 Apr  |
| Winter cereals                                                                                   |                  |
| D1 (Lanna)                                                                                       | 01 May – 30 June |
| D2 (Brimstone)                                                                                   | 01 Apr – 31 May  |
| D3 (Vreedepel)                                                                                   | 01 Apr – 31 May  |
| D4 (Skousbo)                                                                                     | 01 May – 30 June |
| D5 (La Jailiere)                                                                                 | 01 Apr – 31 May  |
| D6 (Thiva)                                                                                       | 01 Apr – 31 May  |
| R1 (Weiherbach)                                                                                  | 01 Apr – 31 May  |
| R3 (Bologna)                                                                                     | 01 Apr – 31 May  |
| R4 (Roujan)                                                                                      | 01 Apr – 31 May  |
| Spring cereals                                                                                   |                  |
| D1 (Lanna)                                                                                       | 19-Jun – 19-Jul  |
| D3 (Vreedepel)                                                                                   | 16-May – 15-Jun  |
| D4 (Skousbo)                                                                                     | 10-Jun – 10-Jul  |
| D5 (La Jailiere)                                                                                 | 29-Apr – 29-May  |
| R4 (Roujan)                                                                                      | 29-Apr – 29-May  |
| Olives (granular; drift adjusted)                                                                |                  |
| D6 (Thiva)                                                                                       | 01-Mar – 31-Mar  |
| R4 (Roujan)                                                                                      | 01-Mar – 31-Mar  |

| FOCUS Steps 1 and 2 for tribenuron methyl |              |                          |                            |                          |                            |
|-------------------------------------------|--------------|--------------------------|----------------------------|--------------------------|----------------------------|
| Crop                                      | FOCUS step   | Tribenuron-methyl pH>7   |                            | Tribenuron-methyl pH<7   |                            |
|                                           |              | PEC <sub>sw</sub> (µg/l) | PEC <sub>sed</sub> (µg/kg) | PEC <sub>sw</sub> (µg/l) | PEC <sub>sed</sub> (µg/kg) |
| Sunflower. 1 x 30 g                       | 1            | 10.163                   | 0.850                      | 9.783                    | 3.698                      |
|                                           | 2 NE Mar-May | 1.576                    | 0.135                      | 1.132                    | 0.439                      |
|                                           | 2 SE Mar-May | 2.916                    | 0.251                      | 2.033                    | 0.789                      |
| Grass. 1x 7.5 g                           | 1            | 2.541                    | 0.213                      | 2.446                    | 0.925                      |
|                                           | 2 NE Mar-May | 0.164                    | 0.014                      | 0.128                    | 0.049                      |
|                                           | 2 SE Mar-May | 0.268                    | 0.023                      | 0.199                    | 0.077                      |

| FOCUS Steps 1 and 2 for tribenuron methyl |              |                           |       |                           |       |
|-------------------------------------------|--------------|---------------------------|-------|---------------------------|-------|
| Crop                                      | FOCUS step   | Tribenuron-methyl<br>pH>7 |       | Tribenuron-methyl<br>pH<7 |       |
|                                           |              |                           |       |                           |       |
| Winter Cereals. 1 x 24 g                  | 1            | 8.13                      | 0.680 | 7.826                     | 2.959 |
|                                           | 2 NE Mar-May | 0.859                     | 0.074 | 0.635                     | 0.246 |
|                                           | 2 SE Mar-May | 1.529                     | 0.131 | 1.086                     | 0.421 |
| Spring Cereals. 1 x 22.5 g                | 1            | 7.622                     | 0.638 | 7.337                     | 2.774 |
|                                           | 2 NE Mar-May | 0.805                     | 0.069 | 0.595                     | 0.230 |
|                                           | 2 SE Mar-May | 1.433                     | 0.123 | 1.018                     | 0.395 |
| Olives. 1 x 20 g                          | 1            | 7.639                     | 0.632 | 7.386                     | 2.748 |
|                                           | 2 NE Oct-Feb | 2.013                     | 0.173 | 1.627                     | 0.627 |
|                                           | 2 SE Oct-Feb | 3.130                     | 0.269 | 2.378                     | 0.919 |

| Sunflowers; pH<7                   |               |                           |                        |                        |                          |
|------------------------------------|---------------|---------------------------|------------------------|------------------------|--------------------------|
| FOCUS STEP 3<br>Scenario<br>Parent | Water<br>body | Application<br>date (PAT) | Main<br>entry<br>route | PECSW (µg/L)<br>Actual | PECSED (µg/kg)<br>Actual |
| D5                                 | pond          | 11-may                    | Drift                  | 0.006                  | 0.004                    |
| D5                                 | stream        | 11-may                    | Drift                  | 0.134                  | 0.003                    |
| R1                                 | pond          | 09-may                    | Run-off                | 0.014                  | 0.009                    |
| R1                                 | stream        | 09-may                    | Run-off                | 0.277                  | 0.025                    |
| R3                                 | stream        | 22-apr                    | Drift                  | 0.153                  | 0.012                    |
| R4                                 | stream        | 11-apr                    | Run-off                | 0.839                  | 0.116                    |

| Sunflowers; pH>7                   |               |                           |                        |                        |                          |
|------------------------------------|---------------|---------------------------|------------------------|------------------------|--------------------------|
| FOCUS STEP 3<br>Scenario<br>Parent | Water<br>body | Application<br>date (PAT) | Main<br>entry<br>route | PECSW (µg/L)<br>Actual | PECSED (µg/kg)<br>Actual |
| D5                                 | pond          | 11-may                    | Drainage               | 0.015                  | 0.010                    |
| D5                                 | stream        | 11-may                    | Drift                  | 0.139                  | 0.007                    |
| R1                                 | pond          | 09-may                    | Runoff                 | 0.010                  | 0.004                    |
| R1                                 | stream        | 09-may                    | Runoff                 | 0.281                  | 0.014                    |
| R3                                 | stream        | 22-apr                    | Drift                  | 0.153                  | 0.007                    |
| R4                                 | stream        | 11-apr                    | Runoff                 | 1.263                  | 0.108                    |

| winter cereals (pH>7)              |               |                     |                        |                        |                          |
|------------------------------------|---------------|---------------------|------------------------|------------------------|--------------------------|
| FOCUS STEP 3<br>Scenario<br>Parent | Water<br>body | Application<br>date | Main<br>entry<br>route | PECSW (µg/L)<br>Actual | PECSED (µg/kg)<br>Actual |
| D1                                 | ditch         | 14-may              | Drift                  | 0.170                  | 0.097                    |
| D1                                 | stream        | 14-may              | Drift                  | 0.141                  | 0.027                    |
| D2                                 | ditch         | 01-apr              | Drainage               | 5.306                  | 1.148                    |
| D2                                 | stream        | 01-apr              | Drainage               | 3.374                  | 0.666                    |
| D3                                 | ditch         | 04-apr              | Drift                  | 0.152                  | 0.018                    |
| D4                                 | pond          | 30-may              | Drift                  | 0.005                  | 0.003                    |
| D4                                 | stream        | 30-may              | Drift                  | 0.127                  | 0.006                    |
| D5                                 | pond          | 08-apr              | Drift                  | 0.005                  | 0.004                    |
| D5                                 | stream        | 08-apr              | Drift                  | 0.121                  | 0.003                    |
| D6                                 | ditch         | 09-apr              | Drift                  | 0.153                  | 0.031                    |
| R1                                 | pond          | 26-apr              | Runoff                 | 0.006                  | 0.005                    |
| R1                                 | stream        | 26-apr              | Runoff                 | 0.161                  | 0.017                    |
| R3                                 | stream        | 04-apr              | Runoff                 | 0.257                  | 0.041                    |
| R4                                 | stream        | 04-may              | Runoff                 | 0.592                  | 0.073                    |

| winter cereals (pH<7)              |               |                     |                        |                        |                          |
|------------------------------------|---------------|---------------------|------------------------|------------------------|--------------------------|
| FOCUS STEP 3<br>Scenario<br>Parent | Water<br>body | Application<br>date | Main<br>entry<br>route | PECSW (µg/L)<br>Actual | PECSED (µg/kg)<br>Actual |
| D1                                 | ditch         | 14-may              | Drift                  | 0.222                  | 0.095                    |
| D1                                 | stream        | 14-may              | Drift                  | 0.165                  | 0.037                    |

| winter cereals (pH<7)        |            |                  |                  |              |                 |
|------------------------------|------------|------------------|------------------|--------------|-----------------|
| FOCUS STEP 3 Scenario Parent | Water body | Application date | Main entry route | PECSW (µg/L) | PECSSED (µg/kg) |
|                              |            |                  |                  | Actual       | Actual          |
| D2                           | ditch      | 01-apr           | Drainage         | 7.952        | 1.349           |
| D2                           | stream     | 01-apr           | Drainage         | 5.469        | 0.759           |
| D3                           | ditch      | 04-apr           | Drift            | 0.173        | 0.027           |
| D4                           | pond       | 30-may           | Drainage         | 0.045        | 0.034           |
| D4                           | stream     | 30-may           | Drift            | 0.143        | 0.022           |
| D5                           | pond       | 08-apr           | Drift            | 0.010        | 0.006           |
| D5                           | stream     | 08-apr           | Drift            | 0.124        | 0.004           |
| D6                           | ditch      | 09-apr           | Drift            | 0.154        | 0.020           |
| R1                           | pond       | 26-apr           | Drift            | 0.005        | 0.003           |
| R1                           | stream     | 26-apr           | Runoff           | 0.222        | 0.014           |
| R3                           | stream     | 04-apr           | Runoff           | 0.299        | 0.029           |
| R4                           | stream     | 04-may           | Runoff           | 0.708        | 0.054           |

| Spring cereals (pH>7)        |            |                  |                  |              |                 |
|------------------------------|------------|------------------|------------------|--------------|-----------------|
| FOCUS STEP 3 Scenario Parent | Water body | Application date | Main entry route | PECSW (µg/L) | PECSSED (µg/kg) |
|                              |            |                  |                  | Actual       | Actual          |
| D1                           | ditch      | 24-jun           | Drift            | 0.152        | 0.093           |
| D1                           | stream     | 24-jun           | Drift            | 0.126        | 0.027           |
| D3                           | ditch      | 15-may           | Drift            | 0.143        | 0.018           |
| D4                           | pond       | 04-jul           | Drift            | 0.005        | 0.003           |
| D4                           | stream     | 04-jul           | Drift            | 0.123        | 0.008           |
| D5                           | pond       | 11-may           | Drift            | 0.005        | 0.003           |
| D5                           | stream     | 11-may           | Drift            | 0.125        | 0.004           |
| R4                           | stream     | 04-may           | Runoff           | 0.574        | 0.071           |

| Spring cereals (pH<7)        |            |                  |                  |              |                 |
|------------------------------|------------|------------------|------------------|--------------|-----------------|
| FOCUS STEP 3 Scenario Parent | Water body | Application date | Main entry route | PECSW (µg/L) | PECSSED (µg/kg) |
|                              |            |                  |                  | Actual       | Actual          |
| D1                           | ditch      | 24-jun           | Drift            | 0.179        | 0.089           |
| D1                           | stream     | 24-jun           | Drift            | 0.126        | 0.045           |
| D3                           | ditch      | 15-may           | Drift            | 0.179        | 0.042           |
| D4                           | pond       | 04-jul           | Drainage         | 0.057        | 0.042           |
| D4                           | stream     | 04-jul           | Drift            | 0.125        | 0.025           |
| D5                           | pond       | 11-may           | Drift            | 0.008        | 0.004           |
| D5                           | stream     | 11-may           | Drift            | 0.126        | 0.005           |
| R4                           | stream     | 04-may           | Runoff           | 0.715        | 0.054           |

| Olives                                                                                 |                              |            |                  |                  |                     |                        |
|----------------------------------------------------------------------------------------|------------------------------|------------|------------------|------------------|---------------------|------------------------|
| Refinement                                                                             | FOCUS STEP 3 Scenario Parent | Water body | Application date | Main entry route | Actual PECSW (µg/L) | Actual PECSSED (µg/kg) |
| "pH<7 (Olive; granular application)"                                                   | D6                           | ditch      | 05-mar           | Drainage         | 0.002               | 0.002                  |
|                                                                                        | R4                           | stream     | 05-mar           | Runoff           | <0.001              | <0.001                 |
| "pH>7 (Olive; granular application)"                                                   | D6                           | ditch      | 05-mar           | Drainage         | 0.006               | 0.003                  |
|                                                                                        | R4                           | stream     | 05-mar           | Runoff           | <0.001              | <0.001                 |
| "pH<7 (Olive; granular application + arable crop drift from ground spray application)" | D6                           | ditch      | 05-mar           | Drift            | 0.128               | 0.019                  |
|                                                                                        | R4                           | stream     | 05-mar           | Drift            | 0.070               | 0.004                  |
| "pH>7                                                                                  | D6                           | ditch      | 05-mar           | Drift            | 0.132               | 0.013                  |



| Olives                                                                           |    |        |        |       |       |       |
|----------------------------------------------------------------------------------|----|--------|--------|-------|-------|-------|
| (Olive; granular application + arable crop drift from ground spray application)" | R4 | stream | 05-mar | Drift | 0.070 | 0.002 |

**Table 8.5-31. PECsw and PECsed at FOCUS Step 4 for tribenuron methyl following application to**

| Sunflowers; pH<7        |                              |            |                  |              |                |
|-------------------------|------------------------------|------------|------------------|--------------|----------------|
| Refinement              | FOCUS STEP 4 Scenario Parent | Water body | Main entry route | PECSW (µg/L) | PECSED (µg/kg) |
|                         |                              |            |                  | Actual       | Actual         |
| pH<7<br>10m nsz+10m vfs | R4                           | stream     | Run-off          | 0.382        | 0.053          |
| pH<7<br>20m nsz+20m vfs | R4                           | stream     | Run-off          | 0.200        | 0.028          |

**Table 8.5-32. PECsw and PECsed at FOCUS Step 4 for tribenuron methyl following application to**

| Sunflowers; pH>7        |                              |            |                  |              |                |
|-------------------------|------------------------------|------------|------------------|--------------|----------------|
| Refinement              | FOCUS STEP 4 Scenario Parent | Water body | Main entry route | PECSW (µg/L) | PECSED (µg/kg) |
|                         |                              |            |                  | Actual       | Actual         |
| pH>7<br>10m nsz+10m vfs | R4                           | stream     | Run-off          | 0.574        | 0.049          |
| pH>7<br>20m nsz+20m vfs | R4                           | stream     | Run-off          | 0.301        | 0.026          |

**Table 8.5-33. PECsw and PECsed at FOCUS Step 4 for tribenuron methyl following application to**

| winter cereals            |                              |            |                  |              |                |
|---------------------------|------------------------------|------------|------------------|--------------|----------------|
| Refinement                | FOCUS STEP 4 Scenario Parent | Water body | Main entry route | PECSW (µg/L) | PECSED (µg/kg) |
|                           |                              |            |                  | Actual       | Actual         |
| pH<7<br>10m nsz+10m vfs   | R4                           | stream     | Run-off          | 0.268        | 0.033          |
| "pH>7<br>10m nsz+10m vfs" | R4                           | stream     | Run-off          | 0.320        | 0.024          |

**Table 8.5-34. PECsw and PECsed at FOCUS Step 4 for tribenuron methyl following application to**

| Spring cereals            |                              |            |                  |              |                |
|---------------------------|------------------------------|------------|------------------|--------------|----------------|
| Refinement                | FOCUS STEP 4 Scenario Parent | Water body | Main entry route | PECSW (µg/L) | PECSED (µg/kg) |
|                           |                              |            |                  | Actual       | Actual         |
| pH<7<br>10m nsz+10m vfs   | R4                           | stream     | Run-off          | 0.260        | 0.032          |
| "pH>7<br>10m nsz+10m vfs" | R4                           | stream     | Run-off          | 0.324        | 0.025          |

Metabolites IN-L5296, IN-A4098, IN-00581, IN-R9805, IN-D5803, IN-D5119, IN-GN815 and IN-R9803

Parameters used in FOCUSsw step 1 and 2

**IN-L5296**

Molecular weight: 154.2  
 Koc/Kom (mL/g): 82.6\*  
 DT<sub>50</sub> soil (d): 207.5  
 DT<sub>50</sub> water/sediment system (d): 227.8  
 DT<sub>50</sub> water (d): 227.8  
 DT<sub>50</sub> sediment (d): 1000

Maximum occurrence observed (% molar basis with respect to the parent)

Total Water and Sediment: 88.9

Soil: 85.7

\*the correct arithmetic mean K<sub>foc</sub> value that should be used is 89.4 mL/g; however, no impact is expected on the aquatic risk assessment.

#### IN-A4098

Molecular weight: 140.1

K<sub>OC</sub>/K<sub>OM</sub> (mL/g): 41.6\*

DT<sub>50</sub> soil (d): 127.7

DT<sub>50</sub> water/sediment system (d): 1000

DT<sub>50</sub> water (d): 1000

DT<sub>50</sub> sediment (d): 1000

Maximum occurrence observed (% molar basis with respect to the parent)

Total Water and Sediment: 0.0001

Soil: 12.6

\*the correct arithmetic mean k<sub>Foc</sub> value that should be used is 71.1 mL/g; however, no impact is expected on the aquatic risk assessment.

#### IN-00581

Molecular weight: 183.2

K<sub>OC</sub>/K<sub>OM</sub> (mL/g): 5.6\*

DT<sub>50</sub> soil (d): 20.5\*\*

DT<sub>50</sub> water/sediment system (d): 10.8

DT<sub>50</sub> water (d): 10.8

DT<sub>50</sub> sediment (d): 1000

Maximum occurrence observed (% molar basis with respect to the parent)

Total Water and Sediment: 38.4

Soil: 33.9

\*the correct arithmetic mean k<sub>Foc</sub> value that should be used is 7.2 mL/g; however, no impact is expected on the aquatic risk assessment.

\*\* the correct geomean soil DT<sub>50</sub> that should be used is 19.1d; however, no impact is expected on the aquatic risk assessment.

#### IN-R9805

Molecular weight: 140.2

K<sub>OC</sub>/K<sub>OM</sub> (mL/g): 105\*

DT<sub>50</sub> soil (d): 85.5

DT<sub>50</sub> water/sediment system (d): 1000

DT<sub>50</sub> water (d): 1000

DT<sub>50</sub> sediment (d): 1000

Maximum occurrence observed (% molar basis with respect to the parent)

Total Water and Sediment: 14.7

Soil: 7.6

\*The correct geometric mean adsorption value that should be used is K<sub>foc</sub> (mL/g) 72.3.

#### M2

Molecular weight: 197.2

K<sub>OC</sub>/K<sub>OM</sub> (mL/g): 97.7\*

DT<sub>50</sub> soil (d): 14.3\*\*

DT<sub>50</sub> water/sediment system (d): 1000

DT<sub>50</sub> water (d): 1000

DT<sub>50</sub> sediment (d): 1000

Maximum occurrence observed (% molar basis with respect to the parent)

Total Water and Sediment: 0.0001

Soil: 16.2

\*the correct arithmetic mean k<sub>Foc</sub> value that should be used is 78.3 mL/g; however, no impact is expected on the aquatic risk

assessment.  
 \*\* the correct geomean soil DT50 that should be used is 21.5d;  
 however, no impact is expected on the aquatic risk assessment.

#### IN-D5803

Molecular weight: 215.2  
 K<sub>OC</sub>/K<sub>OM</sub> (mL/g): 18  
 DT<sub>50</sub> soil (d): 3.0\*  
 DT<sub>50</sub> water/sediment system (d): 1000  
 DT<sub>50</sub> water (d): 1000  
 DT<sub>50</sub> sediment (d): 1000  
 Maximum occurrence observed (% molar basis with respect to the parent)  
 Total Water and Sediment: 0.0001  
 Soil: 46.6  
 \* the correct geomean soil DT50 that should be used is 3.2d;  
 however, no impact is expected on the aquatic risk assessment.

#### IN-D5119

Molecular weight: 201.1  
 K<sub>OC</sub> (mL/g): 3.5\*  
 DT<sub>50</sub> soil (d): 12.4\*\*  
 DT<sub>50</sub> water/sediment system (d): 1000  
 DT<sub>50</sub> water (d): 1000  
 DT<sub>50</sub> sediment (d): 1000  
 Maximum occurrence observed (% molar basis with respect to the parent)  
 Total Water and Sediment: 26.5  
 Soil: 6.1  
 \*the correct arithmetic mean k<sub>Foc</sub> value that should be used is 3.9 mL/g; however, no impact is expected on the aquatic risk assessment.  
 \*\* the correct geomean soil DT50 that should be used is 14.4d;  
 however, no impact is expected on the aquatic risk assessment.

#### IN-GN815

Molecular weight: 367.3  
 K<sub>OC</sub> (mL/g): 15.9  
 DT<sub>50</sub> soil (d): 7.4\*  
 DT<sub>50</sub> water/sediment system (d): 47.6  
 DT<sub>50</sub> water (d): 47.6  
 DT<sub>50</sub> sediment (d): 1000  
 Maximum occurrence observed (% molar basis with respect to the parent)  
 Total Water and Sediment: 13.0  
 Soil: 6.8  
 \* the correct geomean soil DT50 that should be used is 7.2d;  
 however, no impact is expected on the aquatic risk assessment.

#### IN-GK521

Molecular weight: 381.4  
 K<sub>OC</sub> (mL/g): 16.8  
 DT<sub>50</sub> soil (d): 13.4\*  
 DT<sub>50</sub> water/sediment system (d): 1000  
 DT<sub>50</sub> water (d): 1000  
 DT<sub>50</sub> sediment (d): 1000  
 Maximum occurrence observed (% molar basis with respect to the parent)  
 Total Water and Sediment: 0.0001  
 Soil: 32.1  
 \* the correct geomean soil DT50 that should be used is 12.1d;  
 however, no impact is expected on the aquatic risk assessment.

Not applicable

Parameters used in FOCUSsw step 3 (if performed)

Application rate

Sunflowers BBCH 12-18  
 Number of applications: 1  
 Interval (d): -  
 Application rate(s): 30 g a.s./ha  
 Application window: Mar-May

Crop and growth stage:  
 pasture BBCH 59 (established grass)  
 Number of applications: 1  
 Interval (d): -  
 Application rate(s): 7.5 g a.s./ha  
 Application window: Mar-May

Crop and growth stage:  
 winter cereals BBCH 30-39  
 Number of applications: 1  
 Interval (d): -  
 Application rate(s): 24 g a.s./ha  
 Application window: Mar-May

Crop and growth stage:  
 spring cereals BBCH 30-39  
 Number of applications: 1  
 Interval (d): -  
 Application rate(s): 22.5 g a.s./ha  
 Application window: Mar-May

Crop and growth stage:  
 Olives Early applications  
 Number of applications: 1  
 Interval (d): -  
 Application rate(s): 20 g a.s./ha  
 Application window: Mar-May

Main routes of entry

| FOCUS STEP 1                                                                                     |                           |                           |     |                             |     |
|--------------------------------------------------------------------------------------------------|---------------------------|---------------------------|-----|-----------------------------|-----|
| Scenario                                                                                         |                           |                           |     |                             |     |
| 30 g a.s./ha to sunflowers at BBCH 12-19 (minimal crop cover; 25% crop interception) in Mar-May. |                           |                           |     |                             |     |
| Compounds                                                                                        | Day after overall maximum | PECSW ( $\mu\text{g/L}$ ) |     | PECSED ( $\mu\text{g/kg}$ ) |     |
|                                                                                                  |                           | Actual                    | TWA | Actual                      | TWA |
| IN-L5296                                                                                         | 0 h                       | 3.106                     |     | 2.550                       |     |
| IN-A4098                                                                                         | 0 h                       | 0.521                     |     | 0.214                       |     |
| IN-00581                                                                                         | 0 h                       | 1.600                     |     | 0.087                       |     |
| IN-R9805                                                                                         | 0 h                       | 0.245                     |     | 0.256                       |     |
| IN-D5803                                                                                         | 0 h                       | 2.627                     |     | 0.472                       |     |
| IN-D5119                                                                                         | 0 h                       | 0.336                     |     | 0.012                       |     |
| IN-GN815                                                                                         | 0 h                       | 0.633                     |     | 0.099                       |     |
| IN-R9803                                                                                         | 0 h                       | 1.088                     |     | 0.542                       |     |
| IN-GK521                                                                                         | 0 h                       | 3.295                     |     | 0.552                       |     |
| M2                                                                                               | 0 h                       | 0.852                     |     | 0.817                       |     |

| FOCUS STEP 1                                                              |                           |                           |     |                             |     |
|---------------------------------------------------------------------------|---------------------------|---------------------------|-----|-----------------------------|-----|
| Scenario                                                                  |                           |                           |     |                             |     |
| 7.5 g a.s./ha to pasture (full canopy; 75% crop interception) in Mar-May. |                           |                           |     |                             |     |
| Compounds                                                                 | Day after overall maximum | PECSW ( $\mu\text{g/L}$ ) |     | PECSED ( $\mu\text{g/kg}$ ) |     |
|                                                                           |                           | Actual                    | TWA | Actual                      | TWA |
| IN-L5296                                                                  | 0 h                       | 0.777                     |     | 0.638                       |     |
| IN-A4098                                                                  | 0 h                       | 0.13                      |     | 0.054                       |     |
| IN-00581                                                                  | 0 h                       | 0.400                     |     | 0.022                       |     |
| IN-R9805                                                                  | 0 h                       | 0.061                     |     | 0.064                       |     |
| IN-D5803                                                                  | 0 h                       | 0.657                     |     | 0.118                       |     |

| FOCUS STEP 1                                                              |                           |                           |     |                           |     |
|---------------------------------------------------------------------------|---------------------------|---------------------------|-----|---------------------------|-----|
| Scenario                                                                  |                           |                           |     |                           |     |
| 7.5 g a.s./ha to pasture (full canopy; 75% crop interception) in Mar-May. |                           |                           |     |                           |     |
| Compounds                                                                 | Day after overall maximum | PECSW ( $\mu\text{g/L}$ ) |     | PECSW ( $\mu\text{g/L}$ ) |     |
|                                                                           |                           | Actual                    | TWA | Actual                    | TWA |
| IN-D5119                                                                  | 0 h                       | 0.084                     |     | 0.003                     |     |
| IN-GN815                                                                  | 0 h                       | 0.158                     |     | 0.025                     |     |
| IN-R9803                                                                  | 0 h                       | 0.272                     |     | 0.136                     |     |
| IN-GK521                                                                  | 0 h                       | 0.824                     |     | 0.138                     |     |
| M2                                                                        | 0 h                       | 0.213                     |     | 0.204                     |     |

| FOCUS STEP 1                                                                           |                           |                           |     |                           |     |
|----------------------------------------------------------------------------------------|---------------------------|---------------------------|-----|---------------------------|-----|
| Scenario                                                                               |                           |                           |     |                           |     |
| 24 g a.s./ha to winter cereals (average crop cover; 50% crop interception) in Mar-May. |                           |                           |     |                           |     |
| Compounds                                                                              | Day after overall maximum | PECSW ( $\mu\text{g/L}$ ) |     | PECSW ( $\mu\text{g/L}$ ) |     |
|                                                                                        |                           | Actual                    | TWA | Actual                    | TWA |
| IN-L5296                                                                               | 0 h                       | 2.485                     |     | 2.040                     |     |
| IN-A4098                                                                               | 0 h                       | 0.417                     |     | 0.172                     |     |
| IN-00581                                                                               | 0 h                       | 1.280                     |     | 0.070                     |     |
| IN-R9805                                                                               | 0 h                       | 0.196                     |     | 0.205                     |     |
| IN-D5803                                                                               | 0 h                       | 2.102                     |     | 0.378                     |     |
| IN-D5119                                                                               | 0 h                       | 0.269                     |     | 0.009                     |     |
| IN-GN815                                                                               | 0 h                       | 0.507                     |     | 0.079                     |     |
| IN-R9803                                                                               | 0 h                       | 0.871                     |     | 0.434                     |     |
| IN-GK521                                                                               | 0 h                       | 2.636                     |     | 0.442                     |     |
| M2                                                                                     | 0 h                       | 0.682                     |     | 0.653                     |     |

| FOCUS STEP 1                                                                             |                           |                           |     |                           |     |
|------------------------------------------------------------------------------------------|---------------------------|---------------------------|-----|---------------------------|-----|
| Scenario                                                                                 |                           |                           |     |                           |     |
| 22.5 g a.s./ha to spring cereals (average crop cover; 50% crop interception) in Mar-May. |                           |                           |     |                           |     |
| Compounds                                                                                | Day after overall maximum | PECSW ( $\mu\text{g/L}$ ) |     | PECSW ( $\mu\text{g/L}$ ) |     |
|                                                                                          |                           | Actual                    | TWA | Actual                    | TWA |
| IN-L5296                                                                                 | 0 h                       | 2.33                      |     | 1.913                     |     |
| IN-A4098                                                                                 | 0 h                       | 0.391                     |     | 0.161                     |     |
| IN-00581                                                                                 | 0 h                       | 1.200                     |     | 0.066                     |     |
| IN-R9805                                                                                 | 0 h                       | 0.184                     |     | 0.192                     |     |
| IN-D5803                                                                                 | 0 h                       | 1.970                     |     | 0.354                     |     |
| IN-D5119                                                                                 | 0 h                       | 0.252                     |     | 0.009                     |     |
| IN-GN815                                                                                 | 0 h                       | 0.475                     |     | 0.074                     |     |
| IN-R9803                                                                                 | 0 h                       | 0.816                     |     | 0.406                     |     |
| IN-GK521                                                                                 | 0 h                       | 2.471                     |     | 0.414                     |     |
| M2                                                                                       | 0 h                       | 0.639                     |     | 0.613                     |     |

| FOCUS STEP 1                                              |                           |                           |     |                           |     |
|-----------------------------------------------------------|---------------------------|---------------------------|-----|---------------------------|-----|
| Scenario                                                  |                           |                           |     |                           |     |
| 30 g a.s./ha to olives (0% crop interception) in Mar-May. |                           |                           |     |                           |     |
| Compounds                                                 | Day after overall maximum | PECSW ( $\mu\text{g/L}$ ) |     | PECSW ( $\mu\text{g/L}$ ) |     |
|                                                           |                           | Actual                    | TWA | Actual                    | TWA |
| IN-L5296                                                  | 0 h                       | 2.371                     |     | 1.922                     |     |
| IN-A4098                                                  | 0 h                       | 0.653                     |     | 0.264                     |     |
| IN-00581                                                  | 0 h                       | 1.195                     |     | 0.063                     |     |
| IN-R9805                                                  | 0 h                       | 0.191                     |     | 0.196                     |     |
| IN-D5803                                                  | 0 h                       | 2.222                     |     | 0.397                     |     |
| IN-D5119                                                  | 0 h                       | 0.307                     |     | 0.011                     |     |
| IN-GN815                                                  | 0 h                       | 0.468                     |     | 0.073                     |     |
| IN-R9803                                                  | 0 h                       | 1.559                     |     | 0.756                     |     |
| IN-GK521                                                  | 0 h                       | 1.322                     |     | 0.505                     |     |
| M2                                                        | 0 h                       | 0.558                     |     | 0.917                     |     |

| FOCUS STEP 2                                                                                            |                           |                                 |             |                                   |             |
|---------------------------------------------------------------------------------------------------------|---------------------------|---------------------------------|-------------|-----------------------------------|-------------|
| Scenario                                                                                                |                           |                                 |             |                                   |             |
| <b>30 g a.s./ha to sunflowers at BBCH 12-19 (minimal crop cover; 25% crop interception) in Mar-May.</b> |                           |                                 |             |                                   |             |
| Compounds                                                                                               | Day after overall maximum | Actual PEC <sub>sw</sub> (µg/L) |             | Actual PEC <sub>sed</sub> (µg/kg) |             |
|                                                                                                         |                           | Step 2 N EU                     | Step 2 S EU | Step 2 N EU                       | Step 2 S EU |
| IN-L5296                                                                                                | 0 h                       | 0,564                           | 1,040       | 0,463                             | 0,856       |
| IN-A4098                                                                                                | 0 h                       | 0,160                           | 0,227       | 0,066                             | 0,094       |
| IN-00581                                                                                                | 0 h                       | 0,259                           | 0,476       | 0,015                             | 0,027       |
| IN-R9805                                                                                                | 0 h                       | 0,045                           | 0,081       | 0,047                             | 0,085       |
| IN-D5803                                                                                                | 0 h                       | 0,305                           | 0,462       | 0,055                             | 0,083       |
| IN-D5119                                                                                                | 0 h                       | 0,066                           | 0,106       | 0,002                             | 0,004       |
| IN-GN815                                                                                                | 0 h                       | 0,082                           | 0,151       | 0,013                             | 0,024       |
| IN-R9803                                                                                                | 0 h                       | 0,361                           | 0,468       | 0,180                             | 0,234       |
| IN-GK521                                                                                                | 0 h                       | 0,656                           | 1,050       | 0,110                             | 0,176       |
| M2                                                                                                      | 0 h                       | 0,221                           | 0,315       | 0,211                             | 0,303       |

| FOCUS STEP 2                                                                     |                           |                                 |             |                                   |             |
|----------------------------------------------------------------------------------|---------------------------|---------------------------------|-------------|-----------------------------------|-------------|
| Scenario                                                                         |                           |                                 |             |                                   |             |
| <b>7.5 g a.s./ha to pasture (full canopy; 75% crop interception) in Mar-May.</b> |                           |                                 |             |                                   |             |
| Compounds                                                                        | Day after overall maximum | Actual PEC <sub>sw</sub> (µg/L) |             | Actual PEC <sub>sed</sub> (µg/kg) |             |
|                                                                                  |                           | Step 2 N EU                     | Step 2 S EU | Step 2 N EU                       | Step 2 S EU |
| IN-L5296                                                                         | 0 h                       | 0,059                           | 0,097       | 0,048                             | 0,079       |
| IN-A4098                                                                         | 0 h                       | 0,029                           | 0,034       | 0,012                             | 0,014       |
| IN-00581                                                                         | 0 h                       | 0,027                           | 0,044       | 0,002                             | 0,003       |
| IN-R9805                                                                         | 0 h                       | 0,005                           | 0,008       | 0,005                             | 0,008       |
| IN-D5803                                                                         | 0 h                       | 0,049                           | 0,061       | 0,009                             | 0,011       |
| IN-D5119                                                                         | 0 h                       | 0,010                           | 0,013       | <0,001                            | <0,001      |
| IN-GN815                                                                         | 0 h                       | 0,009                           | 0,014       | 0,001                             | 0,002       |
| IN-R9803                                                                         | 0 h                       | 0,072                           | 0,080       | 0,036                             | 0,040       |
| IN-GK521                                                                         | 0 h                       | 0,096                           | 0,127       | 0,016                             | 0,021       |
| M2                                                                               | 0 h                       | 0,039                           | 0,046       | 0,037                             | 0,044       |

| FOCUS STEP 2                                                                                  |                           |                                 |             |                                   |             |
|-----------------------------------------------------------------------------------------------|---------------------------|---------------------------------|-------------|-----------------------------------|-------------|
| Scenario                                                                                      |                           |                                 |             |                                   |             |
| <b>24 g a.s./ha to winter cereals (average crop cover; 50% crop interception) in Mar-May.</b> |                           |                                 |             |                                   |             |
| Compounds                                                                                     | Day after overall maximum | Actual PEC <sub>sw</sub> (µg/L) |             | Actual PEC <sub>sed</sub> (µg/kg) |             |
|                                                                                               |                           | Step 2 N EU                     | Step 2 S EU | Step 2 N EU                       | Step 2 S EU |
| IN-L5296                                                                                      | 0 h                       | 0,309                           | 0,546       | 0,253                             | 0,449       |
| IN-A4098                                                                                      | 0 h                       | 0,108                           | 0,141       | 0,045                             | 0,058       |
| IN-00581                                                                                      | 0 h                       | 0,141                           | 0,250       | 0,008                             | 0,014       |
| IN-R9805                                                                                      | 0 h                       | 0,025                           | 0,043       | 0,026                             | 0,045       |
| IN-D5803                                                                                      | 0 h                       | 0,197                           | 0,275       | 0,035                             | 0,049       |
| IN-D5119                                                                                      | 0 h                       | 0,041                           | 0,061       | 0,001                             | 0,002       |
| IN-GN815                                                                                      | 0 h                       | 0,046                           | 0,080       | 0,007                             | 0,013       |
| IN-R9803                                                                                      | 0 h                       | 0,257                           | 0,310       | 0,128                             | 0,155       |
| IN-GK521                                                                                      | 0 h                       | 0,406                           | 0,603       | 0,068                             | 0,101       |
| M2                                                                                            | 0 h                       | 0,148                           | 0,195       | 0,141                             | 0,187       |

| FOCUS STEP 2                                                                                    |                           |                                 |             |                                   |             |
|-------------------------------------------------------------------------------------------------|---------------------------|---------------------------------|-------------|-----------------------------------|-------------|
| Scenario                                                                                        |                           |                                 |             |                                   |             |
| <b>22.5 g a.s./ha to spring cereals (average crop cover; 50% crop interception) in Mar-May.</b> |                           |                                 |             |                                   |             |
| Compounds                                                                                       | Day after overall maximum | Actual PEC <sub>sw</sub> (µg/L) |             | Actual PEC <sub>sed</sub> (µg/kg) |             |
|                                                                                                 |                           | Step 2 N EU                     | Step 2 S EU | Step 2 N EU                       | Step 2 S EU |
| IN-L5296                                                                                        | 0 h                       | 0,289                           | 0,512       | 0,237                             | 0,421       |
| IN-A4098                                                                                        | 0 h                       | 0,102                           | 0,133       | 0,042                             | 0,055       |
| IN-00581                                                                                        | 0 h                       | 0,133                           | 0,235       | 0,007                             | 0,013       |
| IN-R9805                                                                                        | 0 h                       | 0,023                           | 0,040       | 0,024                             | 0,042       |
| IN-D5803                                                                                        | 0 h                       | 0,184                           | 0,258       | 0,033                             | 0,046       |
| IN-D5119                                                                                        | 0 h                       | 0,038                           | 0,057       | 0,001                             | 0,002       |

| FOCUS STEP 2                                                                                    |                           |                                 |             |                                   |             |
|-------------------------------------------------------------------------------------------------|---------------------------|---------------------------------|-------------|-----------------------------------|-------------|
| Scenario                                                                                        |                           |                                 |             |                                   |             |
| <b>22.5 g a.s./ha to spring cereals (average crop cover; 50% crop interception) in Mar-May.</b> |                           |                                 |             |                                   |             |
| Compounds                                                                                       | Day after overall maximum | Actual PEC <sub>sw</sub> (µg/L) |             | Actual PEC <sub>sed</sub> (µg/kg) |             |
|                                                                                                 |                           | Step 2 N EU                     | Step 2 S EU | Step 2 N EU                       | Step 2 S EU |
| IN-GN815                                                                                        | 0 h                       | 0.043                           | 0.075       | 0.007                             | 0.012       |
| IN-R9803                                                                                        | 0 h                       | 0.241                           | 0.291       | 0.120                             | 0.145       |
| IN-GK521                                                                                        | 0 h                       | 0.381                           | 0.566       | 0.064                             | 0.095       |
| M2                                                                                              | 0 h                       | 0.139                           | 0.183       | 0.132                             | 0.175       |

| FOCUS STEP 2                                                      |                           |                                 |             |                                   |             |
|-------------------------------------------------------------------|---------------------------|---------------------------------|-------------|-----------------------------------|-------------|
| Scenario                                                          |                           |                                 |             |                                   |             |
| <b>30 g a.s./ha to olives (0 % crop interception) in Mar-May.</b> |                           |                                 |             |                                   |             |
| Compounds                                                         | Day after overall maximum | Actual PEC <sub>sw</sub> (µg/L) |             | Actual PEC <sub>sed</sub> (µg/kg) |             |
|                                                                   |                           | Step 2 N EU                     | Step 2 S EU | Step 2 N EU                       | Step 2 S EU |
| IN-L5296                                                          | 0 h                       | 0,734                           | 1,130       | 0,596                             | 0,923       |
| IN-A4098                                                          | 0 h                       | 0,412                           | 0,468       | 0,169                             | 0,192       |
| IN-00581                                                          | 0 h                       | 0.336                           | 0.517       | 0.019                             | 0.029       |
| IN-R9805                                                          | 0 h                       | 0.061                           | 0.092       | 0.063                             | 0.095       |
| IN-D5803                                                          | 0 h                       | 0.691                           | 0.822       | 0.124                             | 0.147       |
| IN-D5119                                                          | 0 h                       | 0.134                           | 0.167       | 0.005                             | 0.006       |
| IN-GN815                                                          | 0 h                       | 0.111                           | 0.168       | 0.018                             | 0.027       |
| IN-R9803                                                          | 0 h                       | 1.054                           | 1.143       | 0.523                             | 0.568       |
| IN-GK521                                                          | 0 h                       | 1.322                           | 1.650       | 0.221                             | 0.276       |
| M2                                                                | 0 h                       | 0.558                           | 0.637       | 0.527                             | 0.604       |

Tribenuron-methyl in CHA 6310  
Parameters used in FOCUSsw step 1 and 2

Version control no. of FOCUS calculator: 3.2  
Molecular weight (g/mol): 395.4  
K<sub>foc</sub> (mL/g): 38.9 (pH<7); 8.6 (pH>7)\*  
Geometric lab DT<sub>50</sub> soil (d): 5.3 (pH<7); 16.7 (pH>7)DT<sub>50</sub>  
water/sediment system (d):18.5\*\*  
DT<sub>50</sub> water (d): 18.5\*\*  
DT<sub>50</sub> sediment (d): 1000  
Crop interception (%):  
Winter and spring cereals: minimal crop interception (25%)

\* The correct arithmetic means that should be used are: K<sub>foc</sub> (mL/g): 46.3 (pH<7) and 9.36 (pH>7), however no impact is expected on the aquatic risk assessment.  
\*\* the correct DT<sub>50</sub> for whole system and water should have been 18.2 days, however no impact is expected on the aquatic risk assessment.

Parameters used in FOCUSsw step 3 (if performed)

Version control no.'s of FOCUS software:  
FOCUS SWASH 5.3, including:  
PRZM 4.3.1  
FOCUS MACRO 5.5.4  
FOCUS TOXSWA 4.4.3  
SWAN 4.0.1  
Water solubility (mg/L): 2083  
Vapour pressure: 5.99 x 10<sup>-8</sup> Pa at 25°C  
K<sub>oc</sub> (mL/g): 38.9 (pH<7); 8.6 (pH>7)\*  
1/n: 0.98 (pH<7);1.0 (pH>7)  
Geometric lab DT<sub>50</sub> soil (d): 5.3 (pH<7); 16.7 (pH>7)DT<sub>50</sub> DT<sub>50</sub>  
water (d): 18.5  
DT<sub>50</sub> sediment (d): 1000  
Q<sub>10</sub>=2.58, Walker equation coefficient 0.7  
Crop uptake factor: 0  
\* The correct arithmetic means that should be used are: K<sub>foc</sub> (mL/g): 46.3 (pH<7) and 9.36 (pH>7), however no impact is expected on the aquatic risk assessment.

Application rate

Steps 1-2:  
Crop and growth stage:  
winter cereals BBCH 12-29  
Number of applications: 1  
Interval (d): -  
Application rate(s):15 g a.s./ha  
Application window: Oct-Feb  
  
Crop and growth stage:  
winter cereals BBCH 12-39  
Number of applications: 1  
Interval (d): -  
Application rate(s):30 g a.s./ha  
Application window: Mar-May  
  
Crop and growth stage:  
spring cereals BBCH 12-39  
Number of applications: 1  
Interval (d): -  
Application rate(s):30 g a.s./ha  
Application window: Mar-May

Step 3  
Crop and growth stage, number of applications, application rate(s) is the same as for Steps 1-2.  
Application window:  
Winter cereals (autumn): 14 days post emergence + 30 days  
Winter cereals (spring): 1 Apr +30 days for Northern European scenarios. 1 Mar + 30 days for Central and Southern scenarios (pH>7 only) and 1 may +30 days for Northern European scenarios. 1 april + 30 days for Central and Southern scenarios (pH>7 and pH>7).



Spring cereals (spring): 14 days post emergence + 30 days (pH>7 only) and 45 days after emergence + 30 days (pH>7 and pH <7)

| FOCUS Steps 1 and 2 for tribenuron methyl and its metabolites following a single application to cereals (using DT50 soil = 16.7 days; pH>7) |              |              |                |
|---------------------------------------------------------------------------------------------------------------------------------------------|--------------|--------------|----------------|
| Crop                                                                                                                                        | FOCUS step   | PECsw (µg/l) | PECsed (µg/kg) |
| Winter/spring cereals (spring application)                                                                                                  | 1            | 10.16        | 0.85           |
|                                                                                                                                             | 2 NE Mar-May | 1.91         | 0.16           |
|                                                                                                                                             | 2 SE Mar-May | 3.59         | 0.31           |
| Winter cereal (autumn application)                                                                                                          | 1            | 5.08         | 0.43           |
|                                                                                                                                             | 2 NE Oct-Feb | 2.21         | 0.19           |
|                                                                                                                                             | 2 SE Oct-Feb | 1.79         | 0.15           |

| single autumn application to winter cereals (using DT50 soil = 16.7 days; pH>7) |            |                  |                  |                        |                          |
|---------------------------------------------------------------------------------|------------|------------------|------------------|------------------------|--------------------------|
| FOCUS STEP 3 Scenario Parent                                                    | Water body | Application date | Main entry route | PECSW (µg/L)<br>Actual | PECSED (µg/kg)<br>Actual |
| D1                                                                              | ditch      | 23-Oct           | Drainage         | 1.749                  | 0.463                    |
| D1                                                                              | stream     | 23-Oct           | Drainage         | 1.125                  | 0.319                    |
| D2                                                                              | ditch      | 28-nov           | Drainage         | 1.722                  | 0.367                    |
| D2                                                                              | stream     | 29-nov           | Drainage         | 1.316                  | 0.217                    |
| D3                                                                              | ditch      | 10-dec           | Drift            | 0.387                  | 0.250                    |
| D4                                                                              | pond       | 26-Oct           | Drainage         | 0.490                  | 0.315                    |
| D4                                                                              | stream     | 26-Oct           | Drainage         | 0.470                  | 0.177                    |
| D5                                                                              | pond       | 27-nov           | Drainage         | 0.394                  | 0.211                    |
| D5                                                                              | stream     | 27-nov           | Drainage         | 0.267                  | 0.097                    |
| D6                                                                              | ditch      | 30-dec           | Drainage         | 0.446                  | 0.054                    |
| R1                                                                              | pond       | 27-nov           | Drift            | 0.003                  | 0.001                    |
| R1                                                                              | stream     | 27-nov           | Run-off          | 0.086                  | 0.002                    |
| R3                                                                              | stream     | 20-dec           | Run-off          | 1.123                  | 0.074                    |
| R4                                                                              | stream     | 10-dec           | Run-off          | 0.195                  | 0.014                    |

| a single spring application to winter cereals (using DT50 soil = 16.7 days; pH>7); early application. |            |                  |                  |                        |                          |
|-------------------------------------------------------------------------------------------------------|------------|------------------|------------------|------------------------|--------------------------|
| FOCUS STEP 3 Scenario Parent                                                                          | Water body | Application date | Main entry route | PECSW (µg/L)<br>Actual | PECSED (µg/kg)<br>Actual |
| D1                                                                                                    | ditch      | 01-apr           | Drainage         | 4.431                  | 1.264                    |
| D1                                                                                                    | stream     | 01-apr           | Drainage         | 2.790                  | 0.684                    |
| D2                                                                                                    | ditch      | 12-mar           | Drainage         | 3.819                  | 0.727                    |
| D2                                                                                                    | stream     | 12-mar           | Drainage         | 2.413                  | 0.437                    |
| D3                                                                                                    | ditch      | 29-Feb           | Drift            | 0.216                  | 0.031                    |
| D4                                                                                                    | pond       | 18-apr           | Drainage         | 0.047                  | 0.035                    |
| D4                                                                                                    | stream     | 18-apr           | Drift            | 0.171                  | 0.023                    |
| D5                                                                                                    | pond       | 07-mar           | Drift            | 0.013                  | 0.007                    |
| D5                                                                                                    | stream     | 07-mar           | Drift            | 0.154                  | 0.005                    |
| D6                                                                                                    | ditch      | 05-mar           | Drift            | 0.209                  | 0.025                    |
| R1                                                                                                    | pond       | 17-mar           | Run-off          | 0.016                  | 0.007                    |
| R1                                                                                                    | stream     | 17-mar           | Run-off          | 0.500                  | 0.034                    |
| R3                                                                                                    | stream     | 01-mar           | Run-off          | 1.218                  | 0.088                    |
| R4                                                                                                    | stream     | 05-mar           | Drift            | 0.125                  | 0.005                    |

| single spring application to winter cereals (using DT50 soil = 16.7 days; pH>7); late application |            |                  |                  |                        |                          |
|---------------------------------------------------------------------------------------------------|------------|------------------|------------------|------------------------|--------------------------|
| FOCUS STEP 3 Scenario Parent                                                                      | Water body | Application date | Main entry route | PECSW (µg/L)<br>Actual | PECSED (µg/kg)<br>Actual |
| D1                                                                                                | ditch      | 14-May           | Drift            | 0.314                  | 0.146                    |
| D1                                                                                                | stream     | 14-May           | Drift            | 0.223                  | 0.065                    |
| D2                                                                                                | ditch      | 01-apr           | Drainage         | 4.103                  | 0.807                    |

| single spring application to winter cereals (using DT50 soil = 16.7 days; pH>7); late application |            |                  |                  |              |              |
|---------------------------------------------------------------------------------------------------|------------|------------------|------------------|--------------|--------------|
| FOCUS STEP 3 Scenario Parent                                                                      | Water body | Application date | Main entry route | PECSW (µg/L) | PECSW (µg/L) |
|                                                                                                   |            |                  |                  | Actual       | Actual       |
| D2                                                                                                | stream     | 01-apr           | Drainage         | 2.820        | 0.458        |
| D3                                                                                                | ditch      | 04-apr           | Drift            | 0.217        | 0.035        |
| D4                                                                                                | pond       | 30-May           | Drainage         | 0.051        | 0.038        |
| D4                                                                                                | stream     | 30-May           | Drift            | 0.174        | 0.023        |
| D5                                                                                                | pond       | 08-apr           | Drift            | 0.012        | 0.007        |
| D5                                                                                                | stream     | 08-apr           | Drift            | 0.155        | 0.005        |
| D6                                                                                                | ditch      | 09-apr           | Drift            | 0.193        | 0.024        |
| R1                                                                                                | pond       | 26-apr           | Drift            | 0.007        | 0.003        |
| R1                                                                                                | stream     | 26-apr           | Run-off          | 0.277        | 0.017        |
| R3                                                                                                | stream     | 04-apr           | Run-off          | 0.371        | 0.036        |
| R4                                                                                                | stream     | 29-apr           | Run-off          | 0.567        | 0.044        |

| single spring application to winter cereals (using DT50 soil = 5.3 days and pH<7); late application. |            |                  |                  |              |              |
|------------------------------------------------------------------------------------------------------|------------|------------------|------------------|--------------|--------------|
| FOCUS STEP 3 Scenario Parent                                                                         | Water body | Application date | Main entry route | PECSW (µg/L) | PECSW (µg/L) |
|                                                                                                      |            |                  |                  | Actual       | Actual       |
| D1                                                                                                   | ditch      | 14-May           | Drift            | 0.213        | 0.192        |
| D1                                                                                                   | stream     | 14-May           | Drift            | 0.177        | 0.026        |
| D2                                                                                                   | ditch      | 01-apr           | Drainage         | 3.693        | 1.945        |
| D2                                                                                                   | stream     | 01-apr           | Drainage         | 2.343        | 1.125        |
| D3                                                                                                   | ditch      | 04-apr           | Drift            | 0.190        | 0.026        |
| D4                                                                                                   | pond       | 30-May           | Drift            | 0.007        | 0.006        |
| D4                                                                                                   | stream     | 30-May           | Drift            | 0.159        | 0.003        |
| D5                                                                                                   | pond       | 08-apr           | Drift            | 0.007        | 0.006        |
| D5                                                                                                   | stream     | 08-apr           | Drift            | 0.152        | 0.001        |
| D6                                                                                                   | ditch      | 09-apr           | Drift            | 0.191        | 0.084        |
| R1                                                                                                   | pond       | 26-apr           | Run-off          | 0.008        | 0.007        |
| R1                                                                                                   | stream     | 26-apr           | Run-off          | 0.229        | 0.014        |
| R3                                                                                                   | stream     | 04-apr           | Run-off          | 0.405        | 0.056        |
| R4                                                                                                   | stream     | 29-apr           | Run-off          | 0.583        | 0.078        |

| single application to spring cereals (using DT50 soil = 16.7 days and pH>7); early application. |            |                  |                  |              |              |
|-------------------------------------------------------------------------------------------------|------------|------------------|------------------|--------------|--------------|
| FOCUS STEP 3 Scenario Parent                                                                    | Water body | Application date | Main entry route | PECSW (µg/L) | PECSW (µg/L) |
|                                                                                                 |            |                  |                  | Actual       | Actual       |
| D1                                                                                              | ditch      | 17-jun           | Drift            | 0.251        | 0.122        |
| D1                                                                                              | stream     | 17-jun           | Drift            | 0.169        | 0.054        |
| D3                                                                                              | ditch      | 20-apr           | Drift            | 0.228        | 0.045        |
| D4                                                                                              | stream     | 30-May           | Drainage         | 0.054        | 0.042        |
| D4                                                                                              | ditch      | 30-May           | Drift            | 0.175        | 0.026        |
| D5                                                                                              | pond       | 11-May           | Drainage         | 0.028        | 0.018        |
| D5                                                                                              | stream     | 11-May           | Drift            | 0.178        | 0.015        |
| R4                                                                                              | pond       | 04-May           | Drift            | 0.126        | 0.005        |

| single application to spring cereals (using DT50 soil = 16.7 days and pH>7); late application. |            |                  |                  |              |              |
|------------------------------------------------------------------------------------------------|------------|------------------|------------------|--------------|--------------|
| FOCUS STEP 3 Scenario Parent                                                                   | Water body | Application date | Main entry route | PECSW (µg/L) | PECSW (µg/L) |
|                                                                                                |            |                  |                  | Actual       | Actual       |
| D1                                                                                             | ditch      | 24-jun           | Drift            | 0.239        | 0.118        |
| D1                                                                                             | stream     | 24-jun           | Drift            | 0.168        | 0.060        |
| D3                                                                                             | ditch      | 14-May           | Drift            | 0.240        | 0.057        |
| D4                                                                                             | stream     | 04-jul           | Drainage         | 0.076        | 0.056        |
| D4                                                                                             | ditch      | 04-jul           | Drift            | 0.167        | 0.033        |
| D5                                                                                             | pond       | 29-May           | Drift            | 0.010        | 0.006        |
| D5                                                                                             | stream     | 29-May           | Drift            | 0.168        | 0.006        |
| R4                                                                                             | pond       | 29-May           | Run-off          | 0.936        | 0.073        |

| single application to spring cereals (using DT50 soil = 5.3 days and pH<7); late application. |               |                      |                        |                     |                     |
|-----------------------------------------------------------------------------------------------|---------------|----------------------|------------------------|---------------------|---------------------|
| FOCUS STEP 3<br>Scenario<br>Parent                                                            | Water<br>body | Applicati<br>on date | Main<br>entry<br>route | Actual PECSW (µg/L) | Actual PECSW (µg/L) |
|                                                                                               |               |                      |                        | Actual              | Actual              |
| D1                                                                                            | ditch         | 24-jun               | Drift                  | 0.202               | 0.124               |
| D1                                                                                            | stream        | 24-jun               | Drift                  | 0.168               | 0.036               |
| D3                                                                                            | ditch         | 14-May               | Drift                  | 0.190               | 0.025               |
| D4                                                                                            | stream        | 04-jul               | Drift                  | 0.007               | 0.004               |
| D4                                                                                            | ditch         | 04-jul               | Drift                  | 0.164               | 0.011               |
| D5                                                                                            | pond          | 29-May               | Drift                  | 0.007               | 0.004               |
| D5                                                                                            | stream        | 29-May               | Drift                  | 0.166               | 0.006               |
| R4                                                                                            | pond          | 29-May               | Run-off                | 0.850               | 0.107               |

| single autumn application to winter cereals (using DT50 soil = 16.7 days; pH>7) |               |                     |                        |                           |                           |
|---------------------------------------------------------------------------------|---------------|---------------------|------------------------|---------------------------|---------------------------|
| FOCUS STEP 4<br>Scenario<br>Parent                                              | Water<br>body | Application<br>date | Main<br>entry<br>route | Actual PECSW (µg/L)       | Actual PECSW (µg/L)       |
|                                                                                 |               |                     |                        | Step 4:<br>20 m<br>Buffer | Step 4:<br>20 m<br>Buffer |
| D1                                                                              | ditch         | 23-Oct              | Drainage               | 1.748                     | 0.463                     |
| D1                                                                              | stream        | 23-Oct              | Drainage               | 1.125                     | 0.319                     |
| D2                                                                              | ditch         | 28-nov              | Drainage               | 1.722                     | 0.367                     |
| D2                                                                              | stream        | 29-nov              | Drainage               | 1.316                     | 0.217                     |
| D3                                                                              | ditch         | 10-dec              | Drift                  | 0.300                     | 0.250                     |
| D4                                                                              | pond          | 26-Oct              | Drainage               | 0.489                     | 0.315                     |
| D4                                                                              | stream        | 26-Oct              | Drainage               | 0.470                     | 0.177                     |
| D5                                                                              | pond          | 27-nov              | Drainage               | 0.394                     | 0.211                     |
| D6                                                                              | ditch         | 30-dec              | Drainage               | 0.446                     | 0.054                     |
| R3                                                                              | stream        | 20-dec              | Run-off                | 0.264                     | 0.018                     |

| single spring application to winter cereals (using DT50 soil = 16.7 days; pH>7); early application. |               |                     |                        |                           |                           |
|-----------------------------------------------------------------------------------------------------|---------------|---------------------|------------------------|---------------------------|---------------------------|
| FOCUS STEP 4<br>Scenario<br>Parent                                                                  | Water<br>body | Application<br>date | Main<br>entry<br>route | Actual PECSW (µg/L)       | Actual PECSW (µg/L)       |
|                                                                                                     |               |                     |                        | Step 4:<br>20 m<br>Buffer | Step 4:<br>20 m<br>Buffer |
| D1                                                                                                  | ditch         | 23-Oct              | Drainage               | 4.431                     | 1.264                     |
| D1                                                                                                  | stream        | 23-Oct              | Drainage               | 2.790                     | 0.684                     |
| D2                                                                                                  | ditch         | 28-nov              | Drainage               | 3.819                     | 0.727                     |
| D2                                                                                                  | stream        | 29-nov              | Drainage               | 2.413                     | 0.437                     |
| R1                                                                                                  | stream        | 27-nov              | Run-off                | 0.118                     | 0.008                     |
| R3                                                                                                  | stream        | 20-dec              | Run-off                | 0.289                     | 0.021                     |

| single spring application to winter cereals (using DT50 soil = 16.7 days; pH>7); late application. |               |                     |                        |                           |                           |
|----------------------------------------------------------------------------------------------------|---------------|---------------------|------------------------|---------------------------|---------------------------|
| FOCUS STEP 4<br>Scenario<br>Parent                                                                 | Water<br>body | Application<br>date | Main<br>entry<br>route | Actual PECSW (µg/L)       | Actual PECSW (µg/L)       |
|                                                                                                    |               |                     |                        | Step 4:<br>10 m<br>Buffer | Step 4:<br>10 m<br>Buffer |
| D1                                                                                                 | ditch         | 23-Oct              | Drainage               | 0.314                     | 0.146                     |
| D1                                                                                                 | stream        | 23-Oct              | Drainage               | 0.223                     | 0.065                     |
| D2                                                                                                 | ditch         | 28-nov              | Drainage               | 4.103                     | 0.807                     |
| D2                                                                                                 | stream        | 29-nov              | Drainage               | 2.820                     | 0.458                     |
| R3                                                                                                 | stream        | 20-dec              | Run-off                | 0.169                     | 0.016                     |
| R4                                                                                                 | stream        | 10-dec              | Run-off                | 0.256                     | 0.020                     |

| single spring application to winter cereals (using DT50 soil = 5.3 days and pH<7); late application. |               |                     |                        |                           |                           |
|------------------------------------------------------------------------------------------------------|---------------|---------------------|------------------------|---------------------------|---------------------------|
| FOCUS STEP 4<br>Scenario<br>Parent                                                                   | Water<br>body | Application<br>date | Main<br>entry<br>route | Actual PECSW (µg/L)       | Actual PECSW (µg/L)       |
|                                                                                                      |               |                     |                        | Step 4:<br>10 m<br>Buffer | Step 4:<br>10 m<br>Buffer |
| D2                                                                                                   | ditch         | 28-nov              | Drainage               | 3.693                     | 1.945                     |

| single spring application to winter cereals (using DT50 soil = 5.3 days and ph<7); late application. |            |                  |                  |                     |                      |
|------------------------------------------------------------------------------------------------------|------------|------------------|------------------|---------------------|----------------------|
| FOCUS STEP 4 Scenario Parent                                                                         | Water body | Application date | Main entry route | Actual PECSW (µg/L) | Actual PECSW (µg/kg) |
|                                                                                                      |            |                  |                  | Step 4: 10 m Buffer | Step 4: 10 m Buffer  |
| D2                                                                                                   | stream     | 29-nov           | Drainage         | 2.343               | 1.125                |
| R3                                                                                                   | stream     | 20-dec           | Run-off          | 0.149               | 0.023                |
| R4                                                                                                   | stream     | 10-dec           | Run-off          | 0.325               | 0.041                |

| single application to spring cereals (using DT50 soil = 16.7 days and ph>7); late application. |            |                  |                  |                     |                      |
|------------------------------------------------------------------------------------------------|------------|------------------|------------------|---------------------|----------------------|
| FOCUS STEP 4 Scenario Parent                                                                   | Water body | Application date | Main entry route | Actual PECSW (µg/L) | Actual PECSW (µg/kg) |
|                                                                                                |            |                  |                  | Step 4: 20 m Buffer | Step 4: 20 m Buffer  |
| R4                                                                                             | pond       | 29-May           | Run-off          | 0.221               | 0.017                |

| single application to spring cereals (using DT50 soil = 5.3 days and ph<7); late application. |            |                  |                  |                     |                      |
|-----------------------------------------------------------------------------------------------|------------|------------------|------------------|---------------------|----------------------|
| FOCUS STEP 4 Scenario Parent                                                                  | Water body | Application date | Main entry route | Actual PECSW (µg/L) | Actual PECSW (µg/kg) |
|                                                                                               |            |                  |                  | Step 4: 20 m Buffer | Step 4: 20 m Buffer  |
| R4                                                                                            | pond       | 29-May           | Run-off          | 0.200               | 0.025                |

Metabolites IN-L5296, IN-A4098, IN-00581, IN-R9805, IN-D5803, M2, IN-GK521, IN-GN815 and IN-D5119

Parameters used in FOCUSsw step 1 and 2

|                                                                                                                                                                                                                                                                                                                                                                                                                                                                                                                                                                                                                                                                                                                                                                                                                                                                                                                                                                                                                                                                                                                                                                                                                                                                                                                                                                                                                                                                                                         |
|---------------------------------------------------------------------------------------------------------------------------------------------------------------------------------------------------------------------------------------------------------------------------------------------------------------------------------------------------------------------------------------------------------------------------------------------------------------------------------------------------------------------------------------------------------------------------------------------------------------------------------------------------------------------------------------------------------------------------------------------------------------------------------------------------------------------------------------------------------------------------------------------------------------------------------------------------------------------------------------------------------------------------------------------------------------------------------------------------------------------------------------------------------------------------------------------------------------------------------------------------------------------------------------------------------------------------------------------------------------------------------------------------------------------------------------------------------------------------------------------------------|
| <p><u>IN-L5296</u><br/> Molecular weight: 154.2<br/> K<sub>OC</sub>/K<sub>OM</sub> (mL/g): 82.6*<br/> DT<sub>50</sub> soil (d): 207.5<br/> DT<sub>50</sub> water/sediment system (d): 227.8<br/> DT<sub>50</sub> water (d): 227.8<br/> DT<sub>50</sub> sediment (d): 1000<br/> Maximum occurrence observed (% molar basis with respect to the parent)<br/> Total Water and Sediment: 88.9<br/> Soil: 85.7<br/> *the correct arithmetic mean K<sub>foc</sub> value that should be used is 89.4 mL/g; however, no impact is expected on the aquatic risk assessment.</p> <p><u>IN-A4098</u><br/> Molecular weight: 140.1<br/> K<sub>OC</sub>/K<sub>OM</sub> (mL/g): 41.6*<br/> DT<sub>50</sub> soil (d): 127.7<br/> DT<sub>50</sub> water/sediment system (d): 1000<br/> DT<sub>50</sub> water (d): 1000<br/> DT<sub>50</sub> sediment (d): 1000<br/> Maximum occurrence observed (% molar basis with respect to the parent)<br/> Total Water and Sediment: 0.0001<br/> Soil: 12.6<br/> *the correct arithmetic mean k<sub>Foc</sub> c value that should be used is 71.1 mL/g; however, no impact is expected on the aquatic risk assessment.</p> <p><u>IN-00581</u><br/> Molecular weight: 183.2<br/> K<sub>OC</sub>/K<sub>OM</sub> (mL/g): 5.6*<br/> DT<sub>50</sub> soil (d): 20.5**<br/> DT<sub>50</sub> water/sediment system (d): 10.8<br/> DT<sub>50</sub> water (d): 10.8<br/> DT<sub>50</sub> sediment (d): 1000<br/> Maximum occurrence observed (% molar basis with respect to the parent)</p> |
|---------------------------------------------------------------------------------------------------------------------------------------------------------------------------------------------------------------------------------------------------------------------------------------------------------------------------------------------------------------------------------------------------------------------------------------------------------------------------------------------------------------------------------------------------------------------------------------------------------------------------------------------------------------------------------------------------------------------------------------------------------------------------------------------------------------------------------------------------------------------------------------------------------------------------------------------------------------------------------------------------------------------------------------------------------------------------------------------------------------------------------------------------------------------------------------------------------------------------------------------------------------------------------------------------------------------------------------------------------------------------------------------------------------------------------------------------------------------------------------------------------|

Total Water and Sediment: 38.4  
Soil: 33.9  
\*the correct arithmetic mean  $k_{Foc}$  value that should be used is 7.2 mL/g; however, no impact is expected on the aquatic risk assessment.

\*\* the correct geomean soil DT50 that should be used is 19.1d; however, no impact is expected on the aquatic risk assessment.

#### IN-R9805

Molecular weight: 140.2

$K_{OC}/K_{OM}$  (mL/g): 105

DT<sub>50</sub> soil (d): 85.5

DT<sub>50</sub> water/sediment system (d): 1000

DT<sub>50</sub> water (d): 1000

DT<sub>50</sub> sediment (d): 1000

Maximum occurrence observed (% molar basis with respect to the parent)

Total Water and Sediment: 14.7

Soil: 7.6

#### M2

Molecular weight: 197.2

$K_{OC}/K_{OM}$  (mL/g): 97.7\*

DT<sub>50</sub> soil (d): 14.3\*\*

DT<sub>50</sub> water/sediment system (d): 1000

DT<sub>50</sub> water (d): 1000

DT<sub>50</sub> sediment (d): 1000

Maximum occurrence observed (% molar basis with respect to the parent)

Total Water and Sediment: 0.0001

Soil: 16.2

\*the correct arithmetic mean  $k_{Foc}$  value that should be used is 78.3 mL/g; however, no impact is expected on the aquatic risk assessment.

\*\* the correct geomean soil DT50 that should be used is 21.5d; however, no impact is expected on the aquatic risk assessment.

#### IN-D5803

Molecular weight: 215.2

$K_{OC}/K_{OM}$  (mL/g): 18

DT<sub>50</sub> soil (d): 3.0\*

DT<sub>50</sub> water/sediment system (d): 1000

DT<sub>50</sub> water (d): 1000

DT<sub>50</sub> sediment (d): 1000

Maximum occurrence observed (% molar basis with respect to the parent)

Total Water and Sediment: 0.0001

Soil: 46.6

\* the correct geomean soil DT50 that should be used is 3.2d; however, no impact is expected on the aquatic risk assessment.

#### IN-D5119

Molecular weight: 201.1

$K_{OC}$  (mL/g): 3.5\*

DT<sub>50</sub> soil (d): 12.4\*\*

DT<sub>50</sub> water/sediment system (d): 1000

DT<sub>50</sub> water (d): 1000

DT<sub>50</sub> sediment (d): 1000

Maximum occurrence observed (% molar basis with respect to the parent)

Total Water and Sediment: 26.5

Soil: 6.1

\*the correct arithmetic mean  $k_{Foc}$  value that should be used is 3.9 mL/g; however, no impact is expected on the aquatic risk assessment.

\*\* the correct geomean soil DT50 that should be used is 14.4d; however, no impact is expected on the aquatic risk assessment.

Parameters used in FOCUSsw step 3 (if performed)  
Application rate

|                                                                                                                                                                                                                                                                                                                                                                                                                                                                                                                                                                                   |
|-----------------------------------------------------------------------------------------------------------------------------------------------------------------------------------------------------------------------------------------------------------------------------------------------------------------------------------------------------------------------------------------------------------------------------------------------------------------------------------------------------------------------------------------------------------------------------------|
| <p><u>IN-GN815</u><br/>Molecular weight: 367.3<br/>K<sub>OC</sub> (mL/g): 15.9<br/>DT<sub>50</sub> soil (d): 7.4*<br/>DT<sub>50</sub> water/sediment system (d): 47.6<br/>DT<sub>50</sub> water (d): 47.6<br/>DT<sub>50</sub> sediment (d): 1000<br/>Maximum occurrence observed (% molar basis with respect to the parent)<br/>Total Water and Sediment: 13.0<br/>Soil: 6.8<br/>* the correct geomean soil DT50 that should be used is 7.2d; however, no impact is expected on the aquatic risk assessment.</p>                                                                  |
| <p><u>IN-GK521</u><br/>Molecular weight: 381.4<br/>K<sub>OC</sub> (mL/g): 16.8<br/>DT<sub>50</sub> soil (d): 13.4*<br/>DT<sub>50</sub> water/sediment system (d): 1000<br/>DT<sub>50</sub> water (d): 1000<br/>DT<sub>50</sub> sediment (d): 1000<br/>Maximum occurrence observed (% molar basis with respect to the parent)<br/>Total Water and Sediment: 0.0001<br/>Soil: 32.1<br/>* the correct geomean soil DT50 that should be used is 12.1d; however, no impact is expected on the aquatic risk assessment.</p>                                                             |
| Not applicable                                                                                                                                                                                                                                                                                                                                                                                                                                                                                                                                                                    |
| <p><u>Steps 1-2:</u><br/>Crop and growth stage:<br/>winter cereals BBCH 12-29<br/>Number of applications: 1<br/>Interval (d): -<br/>Application rate(s): 15 g a.s./ha<br/>Application window: Oct-Feb</p> <p>Crop and growth stage:<br/>winter cereals BBCH 12-39<br/>Number of applications: 1<br/>Interval (d): -<br/>Application rate(s): 30 g a.s./ha<br/>Application window: Mar-May</p> <p>Crop and growth stage:<br/>spring cereals BBCH 12-39<br/>Number of applications: 1<br/>Interval (d): -<br/>Application rate(s): 30 g a.s./ha<br/>Application window: Mar-May</p> |

| FOCUS STEP 1                                                |                           |                          |     |                            |     |
|-------------------------------------------------------------|---------------------------|--------------------------|-----|----------------------------|-----|
| Scenario                                                    |                           |                          |     |                            |     |
| <b>Winter cereals 1 x 15 g a.s./ha (autumn application)</b> |                           |                          |     |                            |     |
| Compounds                                                   | Day after overall maximum | PEC <sub>SW</sub> (µg/L) |     | PEC <sub>SED</sub> (µg/kg) |     |
|                                                             |                           | Actual                   | TWA | Actual                     | TWA |
| IN-L5296                                                    | 0 h                       | 3.11                     |     | 2.53                       |     |
| IN-00581                                                    | 0 h                       | 1.69                     |     | 0.09                       |     |
| IN-A4098                                                    | 0 h                       | 0.21                     |     | 0.09                       |     |
| IN-R9805                                                    | 0 h                       | 0.35                     |     | 0.37                       |     |
| M2                                                          | 0 h                       | 0.36                     |     | 0.35                       |     |
| IN-D5119                                                    | 0 h                       | 0.84                     |     | 0.03                       |     |
| IN-GK521                                                    | 0 h                       | 1.51                     |     | 0.25                       |     |

| FOCUS STEP 1                                                |                           |                          |     |                            |     |
|-------------------------------------------------------------|---------------------------|--------------------------|-----|----------------------------|-----|
| Scenario                                                    |                           |                          |     |                            |     |
| <b>Winter cereals 1 x 15 g a.s./ha (autumn application)</b> |                           |                          |     |                            |     |
| Compounds                                                   | Day after overall maximum | PEC <sub>sw</sub> (µg/L) |     | PEC <sub>SED</sub> (µg/kg) |     |
|                                                             |                           | Actual                   | TWA | Actual                     | TWA |
| IN-GN815                                                    | 0 h                       | 0.92                     |     | 0.14                       |     |
| IN-D5803                                                    | 0 h                       | 1.24                     |     | 0.22                       |     |
| IN-R9803                                                    |                           | 0.42                     |     | 0.21                       |     |

| FOCUS STEP 1                                                           |                           |                          |     |                            |     |
|------------------------------------------------------------------------|---------------------------|--------------------------|-----|----------------------------|-----|
| Scenario                                                               |                           |                          |     |                            |     |
| <b>Winter and spring cereals 1 x 30 g a.s./ha (spring application)</b> |                           |                          |     |                            |     |
| Compounds                                                              | Day after overall maximum | PEC <sub>sw</sub> (µg/L) |     | PEC <sub>SED</sub> (µg/kg) |     |
|                                                                        |                           | Actual                   | TWA | Actual                     | TWA |
| IN-L5296                                                               | 0 h                       | 6.23                     |     | 5.07                       |     |
| IN-00581                                                               | 0 h                       | 3.37                     |     | 1.19                       |     |
| IN-A4098                                                               | 0 h                       | 0.42                     |     | 0.18                       |     |
| IN-R9805                                                               | 0 h                       | 0.71                     |     | 0.74                       |     |
| M2                                                                     | 0 h                       | 0.71                     |     | 0.70                       |     |
| IN-D5119                                                               | 0 h                       | 1.69                     |     | 0.06                       |     |
| IN-GK521                                                               | 0 h                       | 3.03                     |     | 0.51                       |     |
| IN-GN815                                                               | 0 h                       | 1.83                     |     | 0.29                       |     |
| IN-D5803                                                               | 0 h                       | 2.48                     |     | 0.45                       |     |
| IN-R9803                                                               |                           | 0.83                     |     | 0.42                       |     |

| FOCUS STEP 2                                                |                           |                                 |             |                                   |             |
|-------------------------------------------------------------|---------------------------|---------------------------------|-------------|-----------------------------------|-------------|
| Scenario                                                    |                           |                                 |             |                                   |             |
| <b>Winter cereals 1 x 15 g a.s./ha (autumn application)</b> |                           |                                 |             |                                   |             |
| Compounds                                                   | Day after overall maximum | Actual PEC <sub>sw</sub> (µg/L) |             | Actual PEC <sub>SED</sub> (µg/kg) |             |
|                                                             |                           | Step 2 N EU                     | Step 2 S EU | Step 2 N EU                       | Step 2 S EU |
| IN-L5296                                                    | 0 h                       | 1.45                            | 1.17        | 1.19                              | 0.96        |
| IN-00581                                                    | 0 h                       | 0.74                            | 0.59        | 0.04                              | 0.03        |
| IN-A4098                                                    | 0 h                       | 0.10                            | 0.08        | 0.04                              | 0.03        |
| IN-R9805                                                    | 0 h                       | 0.16                            | 0.13        | 0.17                              | 0.14        |
| M2                                                          | 0 h                       | 0.15                            | 0.12        | 0.14                              | 0.12        |
| IN-D5119                                                    | 0 h                       | 0.37                            | 0.30        | 0.01                              | 0.01        |
| IN-GK521                                                    | 0 h                       | 0.62                            | 0.49        | 0.10                              | 0.08        |
| IN-GN815                                                    | 0 h                       | 0.38                            | 0.30        | 0.06                              | 0.05        |
| IN-D5803                                                    | 0 h                       | 0.25                            | 0.20        | 0.04                              | 0.04        |
| IN-R9803                                                    | 0 h                       | 0.17                            | 0.13        | 0.09                              | 0.07        |

| FOCUS STEP 2                                                           |                           |                                 |             |                                   |             |
|------------------------------------------------------------------------|---------------------------|---------------------------------|-------------|-----------------------------------|-------------|
| Scenario                                                               |                           |                                 |             |                                   |             |
| <b>Winter and spring cereals 1 x 30 g a.s./ha (spring application)</b> |                           |                                 |             |                                   |             |
| Compounds                                                              | Day after overall maximum | Actual PEC <sub>sw</sub> (µg/L) |             | Actual PEC <sub>SED</sub> (µg/kg) |             |
|                                                                        |                           | Step 2 N EU                     | Step 2 S EU | Step 2 N EU                       | Step 2 S EU |
| IN-L5296                                                               | 0 h                       | 1.21                            | 0.08        | 1.00                              | 0.03        |
| IN-00581                                                               | 0 h                       | 0.62                            | 1.19        | 0.03                              | 0.07        |
| IN-A4098                                                               | 0 h                       | 2.33                            | 0.17        | 1.92                              | 0.07        |
| IN-R9805                                                               | 0 h                       | 0.14                            | 0.26        | 0.14                              | 0.27        |
| M2                                                                     | 0 h                       | 0.12                            | 0.24        | 0.12                              | 0.23        |
| IN-D5119                                                               | 0 h                       | 0.32                            | 0.60        | 0.01                              | 0.02        |
| IN-GK521                                                               | 0 h                       | 0.49                            | 0.98        | 0.08                              | 0.17        |
| IN-GN815                                                               | 0 h                       | 0.32                            | 0.61        | 0.05                              | 0.10        |
| IN-D5803                                                               | 0 h                       | 0.20                            | 0.39        | 0.04                              | 0.07        |
| IN-R9803                                                               | 0 h                       | 0.13                            | 0.27        | 0.07                              | 0.14        |

**Estimation of concentrations from other routes of exposure (Regulation (EU) N° 284/2013, Annex Part A, point 9.4)**

Method of calculation

There are no other routes of exposure considered as significant.

**PEC**

Maximum concentration

Not calculated, not requested



## Section 5 Ecotoxicology

### Effects on birds and other terrestrial vertebrates (Regulation (EU) N° 283/2013, Annex Part A, point 8.1 and Regulation (EU) N° 284/2013, Annex Part A, point 10.1)

| Species                                                                                                                                                                                                                      | Test substance              | Time scale                    | End point        | Toxicity (mg/kg bw per day) |
|------------------------------------------------------------------------------------------------------------------------------------------------------------------------------------------------------------------------------|-----------------------------|-------------------------------|------------------|-----------------------------|
| <b>Birds</b>                                                                                                                                                                                                                 |                             |                               |                  |                             |
| Bobwhite quail                                                                                                                                                                                                               | Tribenuron-methyl           | Acute oral                    | LD <sub>50</sub> | > 2250                      |
| Bobwhite quail                                                                                                                                                                                                               | Tribenuron-methyl           | Reproduction, 23 weeks        | NOEL             | 22 ♂<br>21 ♀                |
| Mallard duck                                                                                                                                                                                                                 | Tribenuron-methyl           | Reproduction, 21 weeks        | NOEL             | 21 ♂<br>23 ♀                |
| <b>Mammals</b>                                                                                                                                                                                                               |                             |                               |                  |                             |
| Rat                                                                                                                                                                                                                          | Tribenuron-methyl           | Acute oral                    | LD <sub>50</sub> | > 5000                      |
| Rat                                                                                                                                                                                                                          | Tribenuron-methyl           | Reproduction, 2-generation    | NOAEL            | 2                           |
| Rat                                                                                                                                                                                                                          | Triazine amine (IN-L5296)   | Acute oral                    | LD <sub>50</sub> | 394                         |
| Rat                                                                                                                                                                                                                          | Triazine amine (IN-L5296)   | 4-week, repeated dose gavage  | NOAEL            | 8                           |
| Rat                                                                                                                                                                                                                          | Sulfonamide urea (IN-B5685) | Acute oral                    | LD <sub>50</sub> | > 11000                     |
| Rat                                                                                                                                                                                                                          | Sulfonamide urea (IN-B5685) | 10 days, repeated dose gavage | NOAEL            | ≥ 220 <sup>a</sup>          |
| Rat                                                                                                                                                                                                                          | Sulfonamide (IN-D5803)      | Acute oral                    | LD <sub>50</sub> | > 7500 <sup>b</sup>         |
| Endocrine disrupting properties (Annex Part A, points 8.1.5)                                                                                                                                                                 |                             |                               |                  |                             |
| With regard to the endocrine disruption potential, as discussed in Section 2, it is unlikely that tribenuron-methyl is an endocrine disruptor in mammals, however, no firm conclusion can be drawn regarding fish and birds. |                             |                               |                  |                             |
| Additional higher tier studies (Annex Part A, points 10.1.1.2):<br>No additional higher tier studies are available.                                                                                                          |                             |                               |                  |                             |
| Terrestrial vertebrate wildlife (birds, mammals, reptile and amphibians) (Annex Part A, points 8.1.4, 10.1.3):<br>No additional higher tier studies are available.                                                           |                             |                               |                  |                             |

a The study was considered of limited reliability but supportive

b Data from EFSA Conclusions for metsulfuron-methyl (EFSA, 2015a) and ethmetsulfuron (EFSA, 2014a)

### DUP: Toxicity/exposure ratios for terrestrial vertebrates (Regulation (EU) N° 284/2013, Part A, Annex point 10.1)

| Sunflowers at 30 g a.s./ha x 1 (Tribenuron methyl 50SG, DPX-L5300 + DPX-KG691 surfactant) |                                      |            |                        |        |         |
|-------------------------------------------------------------------------------------------|--------------------------------------|------------|------------------------|--------|---------|
| Growth stage                                                                              | Indicator or focal species           | Time scale | DDD (mg/kg bw per day) | TER    | Trigger |
| <b>Birds</b>                                                                              |                                      |            |                        |        |         |
| Tribenuron-methyl; Screening Step                                                         |                                      |            |                        |        |         |
| All                                                                                       | Small omnivorous bird                | Acute      | 4.8                    | > 472  | 10      |
|                                                                                           |                                      | Long-term  | 1.0                    | 20     | 5       |
| Worst case plant metabolite; Screening Step                                               |                                      |            |                        |        |         |
| All                                                                                       | Small omnivorous bird                | Acute      | 2.1                    | > 105  | 10      |
|                                                                                           |                                      | Long-term  | 0.46                   | 4.5    | 5       |
| Worst case plant metabolite; Tier 1                                                       |                                      |            |                        |        |         |
| BBCH 00-19                                                                                | Small omnivorous bird "lark"         | Long-term  | 0.078                  | 27     | 5       |
|                                                                                           | Small insectivorous bird "wagtail"   | Long-term  | 0.081                  | 26     | 5       |
| <b>Mammals</b>                                                                            |                                      |            |                        |        |         |
| Tribenuron-methyl; Screening Step                                                         |                                      |            |                        |        |         |
| All                                                                                       | Small herbivorous mammal             | Acute      | 3.6                    | > 1408 | 10      |
|                                                                                           |                                      | Long-term  | 0.8                    | 2.6    | 5       |
| Tribenuron-methyl; Tier 1                                                                 |                                      |            |                        |        |         |
| BBCH 10-19                                                                                | Small insectivorous mammal "shrew"   | Long-term  | 0.067                  | 30     | 5       |
|                                                                                           | Small omnivorous mammal "mouse"      | Long-term  | 0.12                   | 16     | 5       |
|                                                                                           | Large herbivorous mammal "lagomorph" | Long-term  | 0.23                   | 8.8    | 5       |
| Worst case plant metabolite; Screening Step                                               |                                      |            |                        |        |         |

|                                                                                               |                                      |            |                        |        |         |
|-----------------------------------------------------------------------------------------------|--------------------------------------|------------|------------------------|--------|---------|
| All                                                                                           | Small herbivorous mammal             | Acute      | 0.92                   | 427    | 10      |
|                                                                                               |                                      | Long-term  | 0.13                   | 2.0    | 5       |
| Worst case plant metabolite; Tier 1                                                           |                                      |            |                        |        |         |
| BBCH 10-19                                                                                    | Small insectivorous mammal "shrew"   | Long-term  | 0.011                  | 18     | 5       |
|                                                                                               | Small omnivorous mammal "mouse"      | Long-term  | 0.021                  | 9.5    | 5       |
|                                                                                               | Large herbivorous mammal "lagomorph" | Long-term  | 0.039                  | 5.2    | 5       |
| <b>Cereals at 24 g a.s./ha x 1 (Tribenuron methyl 50SG, DPX-L5300 + DPX-KG691 surfactant)</b> |                                      |            |                        |        |         |
| Growth stage                                                                                  | Indicator or focal species           | Time scale | DDD (mg/kg bw per day) | TER    | Trigger |
| <b>Birds</b>                                                                                  |                                      |            |                        |        |         |
| Tribenuron-methyl; Screening Step                                                             |                                      |            |                        |        |         |
| All                                                                                           | Small omnivorous bird                | Acute      | 3.8                    | > 590  | 10      |
|                                                                                               |                                      | Long-term  | 0.8                    | 25     | 5       |
| Worst case plant metabolite; Screening Step                                                   |                                      |            |                        |        |         |
| All                                                                                           | Small omnivorous bird                | Acute      | 1.7                    | > 131  | 10      |
|                                                                                               |                                      | Long-term  | 0.37                   | 5.7    | 5       |
| <b>Mammals</b>                                                                                |                                      |            |                        |        |         |
| Tribenuron-methyl; Screening Step                                                             |                                      |            |                        |        |         |
| All                                                                                           | Small herbivorous mammal             | Acute      | 2.8                    | > 1760 | 10      |
|                                                                                               |                                      | Long-term  | 0.6                    | 3.3    | 5       |
| Tribenuron-methyl; Tier 1                                                                     |                                      |            |                        |        |         |
| BBCH 30-39                                                                                    | Small omnivorous mammal "mouse"      | Long-term  | 0.050                  | 40     | 5       |
| Worst case plant metabolite; Screening Step                                                   |                                      |            |                        |        |         |
| All                                                                                           | Small herbivorous mammal             | Acute      | 0.74                   | 533    | 10      |
|                                                                                               |                                      | Long-term  | 0.10                   | 2.0    | 5       |
| Worst case plant metabolite; Tier 1                                                           |                                      |            |                        |        |         |
| BBCH 30-39                                                                                    | Small omnivorous mammal "mouse"      | Long-term  | 0.008                  | 24     | 5       |
| <b>Olives at 20 g a.s./ha x 1 (Tribenuron methyl 50SG, DPX-L5300 + DPX-KG691 surfactant)</b>  |                                      |            |                        |        |         |
| Growth stage                                                                                  | Indicator or focal species           | Time scale | DDD (mg/kg bw per day) | TER    | Trigger |
| <b>Birds</b>                                                                                  |                                      |            |                        |        |         |
| Tribenuron-methyl; Screening Step                                                             |                                      |            |                        |        |         |
| All                                                                                           | Small insectivorous bird             | Acute      | 0.9                    | > 2404 | 10      |
|                                                                                               |                                      | Long-term  | 0.2                    | 109    | 5       |
| Worst case plant metabolite; Screening Step                                                   |                                      |            |                        |        |         |
| All                                                                                           | Small insectivorous bird             | Acute      | 0.4                    | > 534  | 10      |
|                                                                                               |                                      | Long-term  | 0.09                   | 24.2   | 5       |
| <b>Mammals</b>                                                                                |                                      |            |                        |        |         |
| Tribenuron-methyl; Screening Step                                                             |                                      |            |                        |        |         |
| All                                                                                           | Small herbivorous mammal             | Acute      | 2.7                    | > 1833 | 10      |
|                                                                                               |                                      | Long-term  | 0.8                    | 2.6    | 5       |
| Tribenuron-methyl; Tier 1                                                                     |                                      |            |                        |        |         |
| Application not crop directed                                                                 | Small insectivorous mammal "shrew"   | Long-term  | 0.020                  | 99     | 5       |
|                                                                                               | Small herbivorous mammal "vole"      | Long-term  | 0.77                   | 2.6    | 5       |
|                                                                                               | Large herbivorous mammal "lagomorph" | Long-term  | 0.15                   | 13     | 5       |
|                                                                                               | Small omnivorous mammal "mouse"      | Long-term  | 0.083                  | 24     | 5       |
| Worst case plant metabolite; Screening Step                                                   |                                      |            |                        |        |         |
| All                                                                                           | Small herbivorous mammal             | Acute      | 0.71                   | 555    | 10      |
|                                                                                               |                                      | Long-term  | 0.13                   | 2.0    | 5       |
| Worst case plant metabolite; Tier 1                                                           |                                      |            |                        |        |         |
| Application not crop directed                                                                 | Small insectivorous mammal "shrew"   | Long-term  | 0.003                  | 58     | 5       |
|                                                                                               | Small herbivorous mammal "vole"      | Long-term  | 0.13                   | 1.5    | 5       |
|                                                                                               | Large herbivorous mammal "lagomorph" | Long-term  | 0.026                  | 7.8    | 5       |
|                                                                                               | Small omnivorous mammal "mouse"      | Long-term  | 0.014                  | 14.2   | 5       |

| <b>Pasture at 7.5 g a.s./ha x 1 (Tribenuron methyl 50SG, DPX-L5300 + DPX-KG691 surfactant)</b>                  |                                      |            |                              |        |         |
|-----------------------------------------------------------------------------------------------------------------|--------------------------------------|------------|------------------------------|--------|---------|
| Growth stage                                                                                                    | Indicator or focal species           | Time scale | DDD<br>(mg/kg bw<br>per day) | TER    | Trigger |
| <b>Birds</b>                                                                                                    |                                      |            |                              |        |         |
| Tribenuron-methyl; Screening Step                                                                               |                                      |            |                              |        |         |
| All                                                                                                             | Large herbivorous bird               | Acute      | 0.2                          | > 9836 | 10      |
|                                                                                                                 |                                      | Long-term  | 0.1                          | 326    | 5       |
| Worst case plant metabolite; Screening Step                                                                     |                                      |            |                              |        |         |
| All                                                                                                             | Small omnivorous bird                | Acute      | 0.1                          | > 2186 | 10      |
|                                                                                                                 |                                      | Long-term  | 0.03                         | 72.5   | 5       |
| <b>Mammals</b>                                                                                                  |                                      |            |                              |        |         |
| Tribenuron-methyl; Screening Step                                                                               |                                      |            |                              |        |         |
| All                                                                                                             | Small herbivorous mammal             | Acute      | 1.0                          | > 4888 | 10      |
|                                                                                                                 |                                      | Long-term  | 0.3                          | 7.0    | 5       |
| Worst case plant metabolite; Screening Step                                                                     |                                      |            |                              |        |         |
| All                                                                                                             | Small herbivorous mammal             | Acute      | 0.27                         | 1481   | 10      |
|                                                                                                                 |                                      | Long-term  | 0.05                         | 4.0    | 5       |
| Worst case plant metabolite; Tier 1                                                                             |                                      |            |                              |        |         |
| All                                                                                                             | Large herbivorous mammal "lagomorph" | Long-term  | 0.012                        | 17     | 5       |
|                                                                                                                 | Small herbivorous mammal "vole"      | Long-term  | 0.049                        | 4.1    | 5       |
| <b>Risk from bioaccumulation and food chain behaviour</b>                                                       |                                      |            |                              |        |         |
| Not relevant (Log Pow < 3)                                                                                      |                                      |            |                              |        |         |
| <b>Risk from consumption of contaminated water</b>                                                              |                                      |            |                              |        |         |
| Leaf scenario – not relevant                                                                                    |                                      |            |                              |        |         |
| <b>Puddle scenario, Screening step</b>                                                                          |                                      |            |                              |        |         |
| Birds:                                                                                                          |                                      |            |                              |        |         |
| Application rate (30 g a.s./ha)/NOAEL (21 mg a.s./kg bw per day) <50 (Koc<500 L/kg), TER calculation not needed |                                      |            |                              |        |         |
| Mammals:                                                                                                        |                                      |            |                              |        |         |
| Application rate (30 g a.s./ha)/NOAEL (2 mg a.s./kg bw per day) <50 (Koc<500 L/kg), TER calculation not needed  |                                      |            |                              |        |         |

**TTF: Toxicity/exposure ratios for terrestrial vertebrates (Regulation (EU) N° 284/2013, Part A, Annex point 10.1)**

| <b>Cereals at 30 g a.s./ha x 1 (Tribenuron-Methyl 750 g/kg WG, CHA 6310)</b>                                    |                                 |            |                              |        |         |
|-----------------------------------------------------------------------------------------------------------------|---------------------------------|------------|------------------------------|--------|---------|
| Growth stage                                                                                                    | Indicator or focal species      | Time scale | DDD<br>(mg/kg bw<br>per day) | TER    | Trigger |
| <b>Birds</b>                                                                                                    |                                 |            |                              |        |         |
| Tribenuron-methyl; Screening Step                                                                               |                                 |            |                              |        |         |
| All                                                                                                             | Small omnivorous bird           | Acute      | 4.8                          | > 472  | 10      |
|                                                                                                                 |                                 | Long-term  | 1.0                          | 20     | 5       |
| Worst case plant metabolite; Screening Step                                                                     |                                 |            |                              |        |         |
| All                                                                                                             | Small omnivorous bird           | Acute      | 2.1                          | > 105  | 10      |
|                                                                                                                 |                                 | Long-term  | 0.46                         | 4.5    | 5       |
| Worst case plant metabolite; Tier 1                                                                             |                                 |            |                              |        |         |
| BBCH 10-29                                                                                                      | Large herbivorous bird "goose"  | Long-term  | 0.12                         | 18     | 5       |
| BBCH 10-29                                                                                                      | Small omnivorous bird "lark"    | Long-term  | 0.078                        | 27     | 5       |
| BBCH 30-39                                                                                                      | Small omnivorous bird "lark"    | Long-term  | 0.039                        | 54     | 5       |
| <b>Mammals</b>                                                                                                  |                                 |            |                              |        |         |
| Tribenuron-methyl; Screening Step                                                                               |                                 |            |                              |        |         |
| All                                                                                                             | Small herbivorous mammal        | Acute      | 3.6                          | > 1408 | 10      |
|                                                                                                                 |                                 | Long-term  | 0.8                          | 2.6    | 5       |
| Tribenuron-methyl; Tier 1                                                                                       |                                 |            |                              |        |         |
| BBCH 10-29                                                                                                      | Small omnivorous mammal "mouse" | Long-term  | 0.12                         | 17     | 5       |
| BBCH 30-39                                                                                                      | Small omnivorous mammal "mouse" | Long-term  | 0.062                        | 32     | 5       |
| Worst case plant metabolite; Screening Step                                                                     |                                 |            |                              |        |         |
| All                                                                                                             | Small herbivorous mammal        | Acute      | 0.9                          | 427    | 10      |
|                                                                                                                 |                                 | Long-term  | 0.13                         | 1.5    | 5       |
| Worst case plant metabolite; Tier 1                                                                             |                                 |            |                              |        |         |
| BBCH 10-29                                                                                                      | Small omnivorous mammal "mouse" | Long-term  | 0.021                        | 9.5    | 5       |
| BBCH 30-39                                                                                                      | Small omnivorous mammal "mouse" | Long-term  | 0.011                        | 18     | 5       |
| <b>Risk from bioaccumulation and food chain behaviour</b>                                                       |                                 |            |                              |        |         |
| Not relevant (Log Pow < 3)                                                                                      |                                 |            |                              |        |         |
| <b>Risk from consumption of contaminated water</b>                                                              |                                 |            |                              |        |         |
| <b>Leaf scenario – not relevant</b>                                                                             |                                 |            |                              |        |         |
| <b>Puddle scenario, Screening step</b>                                                                          |                                 |            |                              |        |         |
| Birds:                                                                                                          |                                 |            |                              |        |         |
| Application rate (30 g a.s./ha)/NOAEL (21 mg a.s./kg bw per day) <50 (Koc<500 L/kg), TER calculation not needed |                                 |            |                              |        |         |
| Mammals:                                                                                                        |                                 |            |                              |        |         |
| Application rate (30 g a.s./ha)/NOAEL (2 mg a.s./kg bw per day) <50 (Koc<500 L/kg), TER calculation not needed  |                                 |            |                              |        |         |

**Toxicity data for all aquatic tested species (Regulation (EU) N° 283/2013, Annex Part A, points 8.2 and Regulation (EU) N° 284/2013 Annex Part A, point 10.2)**

| Test species                                      | Test substance                                                | Time-scale                                                                                                                                                              | Endpoint                                                    | Toxicity <sup>a</sup><br>mg/L    | Remark                              |
|---------------------------------------------------|---------------------------------------------------------------|-------------------------------------------------------------------------------------------------------------------------------------------------------------------------|-------------------------------------------------------------|----------------------------------|-------------------------------------|
| <b>Fish</b>                                       |                                                               |                                                                                                                                                                         |                                                             |                                  |                                     |
| <i>Oncorhynchus mykiss</i><br>Rainbow trout       | Tribenuron-methyl                                             | 96h (static)                                                                                                                                                            | Sublethal effects,<br>NOEC<br>Mortality, LC <sub>50</sub>   | 183<br><b>738 (mm)</b>           |                                     |
| <i>Oncorhynchus mykiss</i><br>Rainbow trout       | Tribenuron-methyl 50SG                                        | 96h (static)                                                                                                                                                            | Mortality<br>NOEC<br>LC <sub>50</sub> ,                     | 63<br>>63 (a.s. measured)        | Limit test                          |
| <i>Oncorhynchus mykiss</i><br>Rainbow trout       | Tribenuron-methyl 750 WG                                      | 96h (static)<br>(static)                                                                                                                                                | Mortality<br>NOEC<br>LC <sub>50</sub> ,                     | 75<br>>75 (a.s. nominal)         | Limit test                          |
| <i>Oncorhynchus mykiss</i><br>Rainbow trout       | IN-00581 =<br>saccharin                                       | 96h (static)                                                                                                                                                            | Loss of equilibrium,<br>NOEC<br>Mortality, LC <sub>50</sub> | 69<br>> <b>124 (mm)</b>          |                                     |
| <i>Oncorhynchus mykiss</i><br>Rainbow trout       | IN-00581 =<br>saccharin                                       | This metabolite was also evaluated for metsulfuron-methyl and propoxycarbazone-sodium (EFSA, 2015a and EFSA, 2016b)–The reported 96h LC <sub>50</sub> is >124 mg/L (mm) |                                                             |                                  |                                     |
| <i>Oncorhynchus mykiss</i><br>Rainbow trout       | IN-A4098 = N-demethyl triazine amine (AE F059411, CG A150829) | 96h (static)                                                                                                                                                            | Mortality, LC <sub>50</sub>                                 | > <b>200 (nom)</b>               | Limit test.                         |
| <i>Oncorhynchus mykiss</i><br>Rainbow trout       | IN-D5119 Acid sulfonamide                                     | 96h (static)                                                                                                                                                            | Mortality, LC <sub>50</sub>                                 | > <b>115 (mm)</b>                |                                     |
| <i>Oncorhynchus mykiss</i><br>Rainbow trout       | IN-L5296 Methyl triazine amine                                | 96h (static)                                                                                                                                                            | Mortality,<br>NOEC<br>LC <sub>50</sub>                      | 130<br>>180 (mm)                 |                                     |
| <i>Oncorhynchus mykiss</i><br>Rainbow trout       | IN-L5296 Methyl triazine amine                                | 96h (static)                                                                                                                                                            | Sublethal effects,<br>NOEC,<br>Mortality, LC <sub>50</sub>  | 116<br><b>172 (mm)</b>           |                                     |
| <i>Oncorhynchus mykiss</i><br>Rainbow trout       | Tribenuron-methyl                                             | 21d (flow-through)                                                                                                                                                      | Length, weight survival, NOEC                               | 560 (mm)                         | NOEC = highest tested concentration |
| <i>Cyprinodon variegatus</i><br>Sheepshead minnow | Tribenuron-methyl                                             | 28d (flow-through)<br>Early lifestage (ELS)                                                                                                                             | Larval length weight, survival, NOEC                        | <b>11.9 (mm)</b>                 | NOEC = highest tested concentration |
| <b>Aquatic invertebrates</b>                      |                                                               |                                                                                                                                                                         |                                                             |                                  |                                     |
| <i>Daphnia magna</i><br>Water flea                | Tribenuron-methyl                                             | 48h (static)                                                                                                                                                            | Immobility,<br>NOEC<br>EC <sub>50</sub>                     | 894<br>> <b>894 (mm)</b>         | NOEC = highest concentration tested |
| <i>Daphnia magna</i><br>Water flea                | Tribenuron-methyl 50SG (DuPont)                               | 48h (static)                                                                                                                                                            | Immobility<br>NOEC<br>EC <sub>50</sub>                      | 31<br>>63 (a.s. measured)        |                                     |
| <i>Daphnia magna</i><br>Water flea                | Tribenuron-methyl 50SG plus DUPX-KG691 surfactant             | 48h (static)                                                                                                                                                            | Lethargy, NOEC<br>Immobility, EC <sub>50</sub>              | 7.2<br><b>33 (a.s. measured)</b> |                                     |
| <i>Daphnia magna</i><br>Water flea                | Tribenuron-methyl 750 WG (Task Force)                         | 48h (static)                                                                                                                                                            | Immobility, NOEC<br>EC <sub>50</sub>                        | 7.1<br><b>27.1 (a.s. nom)</b>    |                                     |
| <i>Daphnia magna</i><br>Water flea                | IN-00581 =<br>saccharin                                       | 48h (static)                                                                                                                                                            | Immobility, EC <sub>50</sub> ,                              | > <b>118 (mm)</b>                | Limit test                          |

| Test species                                          | Test substance                                                | Time-scale                                                                                                                                                                                                                                                 | Endpoint                                                                                                                           | Toxicity <sup>a</sup><br>mg/L                          | Remark                                                |
|-------------------------------------------------------|---------------------------------------------------------------|------------------------------------------------------------------------------------------------------------------------------------------------------------------------------------------------------------------------------------------------------------|------------------------------------------------------------------------------------------------------------------------------------|--------------------------------------------------------|-------------------------------------------------------|
| <i>Daphnia magna</i><br>Water flea                    | IN-00581 =<br>saccharin                                       | This metabolite was also evaluated for metsulfuron-methyl and propoxycarbazone-sodium (EFSA, 2015a and EFSA, 2016b). The reported 48h EC <sub>50</sub> is >118 mg/L (mm)                                                                                   |                                                                                                                                    |                                                        |                                                       |
| <i>Daphnia magna</i><br>Water flea                    | IN-A4098 = N-demethyl triazine amine (AE F059411, CG A150829) | 48h (static)                                                                                                                                                                                                                                               | Sublethal effects (lethargic or floating at surface), NOEC, Immobility, EC <sub>50</sub>                                           | 25<br>> <b>99 (mm)</b>                                 |                                                       |
| <i>Daphnia magna</i><br>Water flea                    | IN-A4098 = N-demethyl triazine amine (AE F059411, CG A150829) | 48h (static)                                                                                                                                                                                                                                               | Immobility, EC <sub>50</sub>                                                                                                       | >100 (nom)                                             | Limit test                                            |
| <i>Daphnia magna</i><br>Water flea                    | IN-A4098 = N-demethyl triazine amine (AE F059411, CG A150829) | This metabolite was also evaluated for iodosulfuron-methyl-sodium, prosulfuron, triasulfuron, chlorsulfuron, thifensulfuron-methyl and metsulfuron-methyl. The lowest reported 48h ErC <sub>50</sub> was 16 mg/L (nom) in the RAR for prosulfuron.         |                                                                                                                                    |                                                        |                                                       |
| <i>Daphnia magna</i><br>Water flea                    | IN-D5119 Acid sulfonamide                                     | 48h (static)                                                                                                                                                                                                                                               | Immobility, EC <sub>50</sub>                                                                                                       | > <b>120 (nom)</b>                                     |                                                       |
| <i>Daphnia magna</i><br>Water flea                    | IN-L5296 Methyl triazine amine                                | 48h (static)                                                                                                                                                                                                                                               | Immobility, EC <sub>50</sub>                                                                                                       | >115 (nom)                                             | Limit test                                            |
| <i>Daphnia magna</i><br>Water flea                    | IN-L5296 Methyl triazine amine                                | 48h (static)                                                                                                                                                                                                                                               | Sublethal effects (floating), NOEC, Immobility, EC <sub>50</sub> ,                                                                 | 121<br>> <b>1020 (mm)</b>                              |                                                       |
| <i>Daphnia magna</i><br>Water flea                    | Tribenuron-methyl                                             | 21d (static-renewal)                                                                                                                                                                                                                                       | Adult length, NOEC, Reproduction, EC <sub>10</sub> , EC <sub>20</sub> , EC <sub>50</sub>                                           | 120<br><b>52</b><br>109<br>340 (mm)                    |                                                       |
| <i>Daphnia magna</i><br>Water flea                    | Tribenuron-methyl                                             | 21d (static-renewal)                                                                                                                                                                                                                                       | Adult length, NOEC                                                                                                                 | 114 (mm)                                               |                                                       |
| <i>Daphnia magna</i><br>Water flea                    | Tribenuron-methyl                                             | 21d (static-renewal)                                                                                                                                                                                                                                       | Mortality, reproduction, NOEC                                                                                                      | 41 (nom)                                               |                                                       |
| <i>Daphnia magna</i><br>Water flea                    | IN-A4098 = N-demethyl triazine amine (AE F059411, CG A150829) | <b>21d (static)</b>                                                                                                                                                                                                                                        | Growth rate, NOEC                                                                                                                  | <b>97 (mm)</b>                                         |                                                       |
| <i>Daphnia magna</i><br>Water flea                    | IN-A4098 = N-demethyl triazine amine (AE F059411, CG A150829) | This metabolite was also evaluated for prosulfuron, triasulfuron chlorsulfuron thifensulfuron-methyl and metsulfuron-methyl. The lowest reported 21d NOEC for reproduction was 32 mg/L (nom) in the RARs for thifensulfuron-methyl and metsulfuron-methyl. |                                                                                                                                    |                                                        |                                                       |
| <i>Daphnia magna</i><br>Water flea                    | IN-L5296 Methyl triazine amine                                | <b>21d (static)</b>                                                                                                                                                                                                                                        | Adult weight, NOEC                                                                                                                 | <b>49 (mm)</b>                                         |                                                       |
| <b>Algae</b>                                          |                                                               |                                                                                                                                                                                                                                                            |                                                                                                                                    |                                                        |                                                       |
| <i>Pseudokirchneriella subcapitata</i><br>Green algae | Tribenuron-methyl                                             | 72h (static)                                                                                                                                                                                                                                               | Growth rate<br>NOEC<br>ErC <sub>10</sub><br>ErC <sub>20</sub><br><b>ErC<sub>50</sub></b><br>Biomass EbC <sub>50</sub> <sup>1</sup> | 0.004<br>0.011<br>0.021<br><b>0.068 (nom)</b><br>0.021 | Used for risk assessment of Task Force's applications |

| Test species                                                                                | Test substance                                                | Time-scale                                                                                                                                                                                                                                                                                                                                                                                                                                                                                                                                                  | Endpoint                                                                                                                               | Toxicity <sup>a</sup><br>mg/L                                                         | Remark                                            |
|---------------------------------------------------------------------------------------------|---------------------------------------------------------------|-------------------------------------------------------------------------------------------------------------------------------------------------------------------------------------------------------------------------------------------------------------------------------------------------------------------------------------------------------------------------------------------------------------------------------------------------------------------------------------------------------------------------------------------------------------|----------------------------------------------------------------------------------------------------------------------------------------|---------------------------------------------------------------------------------------|---------------------------------------------------|
| <i>Pseudokirchneriella subcapitata</i><br>Green algae                                       | Tribenuron-methyl 50SG (DuPont)                               | 72h (static)                                                                                                                                                                                                                                                                                                                                                                                                                                                                                                                                                | Growth rate<br>NOEC<br>ErC <sub>10</sub><br>ErC <sub>20</sub><br>ErC <sub>50</sub><br><br>Biomass EbC <sub>50</sub> <sup>1</sup>       | 0.0017<br>0.0053<br>0.0011<br>>0.032 (a.s. measured)<br>0.0162 (formulation; nom)     |                                                   |
| <i>Pseudokirchneriella subcapitata</i><br>Green algae                                       | Tribenuron-methyl 50SG plus DUPX-KG691 surfactant             | 72h (static)                                                                                                                                                                                                                                                                                                                                                                                                                                                                                                                                                | Growth rate<br>NOEC<br>ErC <sub>10</sub><br>ErC <sub>20</sub><br><b>ErC<sub>50</sub></b><br><br>Biomass EbC <sub>50</sub> <sup>1</sup> | 0.0054<br>0.0059<br>0.0084<br><b>0.0169 (a.s. measured)</b><br>0.0076 (a.s. measured) | Used for risk assessment of DuPont's applications |
| <i>Pseudokirchneriella subcapitata</i><br>Green algae                                       | Tribenuron-methyl 750 WG (Task Force)                         | 72h (static)                                                                                                                                                                                                                                                                                                                                                                                                                                                                                                                                                | Growth rate<br>NOEC<br>ErC <sub>10</sub><br>ErC <sub>20</sub><br>ErC <sub>50</sub><br>Biomass EbC <sub>50</sub> <sup>1</sup>           | 0.0075<br>0.027<br>0.055<br>0.32 (a.s. nominal)<br>0.042 (a.s. nominal)               |                                                   |
| <i>Pseudokirchneriella subcapitata</i><br>Green algae                                       | IN-00581 = saccharin                                          | 72h (static)                                                                                                                                                                                                                                                                                                                                                                                                                                                                                                                                                | Growth rate, <b>ErC<sub>50</sub></b> ,<br>Biomass, EC <sub>50</sub> <sup>1</sup>                                                       | <b>&gt;10 (nom)</b><br>>10                                                            | Limit test                                        |
| <i>Pseudokirchneriella subcapitata</i><br>Green algae                                       | IN-00581 = saccharin                                          | This metabolite was also evaluated for metsulfuron-methyl and propoxycarbazone-sodium (EFSA 2015a). The lowest reported 72h ErC <sub>50</sub> was >10 mg/L (nom) in the RAR metsulfuron-methyl-                                                                                                                                                                                                                                                                                                                                                             |                                                                                                                                        |                                                                                       |                                                   |
| <i>Pseudokirchneriella subcapitata</i><br>Green algae                                       | IN-A4098 = N-demethyl triazine amine (AE F059411, CG A150829) | 96h (static)                                                                                                                                                                                                                                                                                                                                                                                                                                                                                                                                                | Growth rate, ErC <sub>50</sub> ,<br>Biomass, EC <sub>50</sub> <sup>1</sup>                                                             | >100<br>>100                                                                          |                                                   |
| <i>Pseudokirchneriella subcapitata</i><br>Green algae                                       | IN-A4098 = N-demethyl triazine amine (AE F059411, CG A150829) | 72h (static)                                                                                                                                                                                                                                                                                                                                                                                                                                                                                                                                                | Growth rate, ErC <sub>50</sub> ,<br>Biomass, EC <sub>50</sub> <sup>1</sup>                                                             | >100 (nom)<br>>100                                                                    |                                                   |
| <i>Scenedesmus subspicatus</i><br>Green algae                                               | IN-A4098 = N-demethyl triazine amine (AE F059411, CG A150829) | 72h (static)                                                                                                                                                                                                                                                                                                                                                                                                                                                                                                                                                | Biomass, <b>EbC<sub>50</sub></b>                                                                                                       | <b>&gt;90 (nom)</b>                                                                   |                                                   |
| <i>Pseudokirchneriella subcapitata</i> and<br><i>Scenedesmus subspicatus</i><br>Green algae | IN-A4098 = N-demethyl triazine amine (AE F059411, CG A150829) | This metabolite was also evaluated for iodosulfuron-methyl-sodium, prosulfuron, triasulfuron, chlorsulfuron, thifensulfuron-methyl and metsulfuron-methyl (EFSA, 2008; 2014b; 2015a,b,c; 2016a,b). The lowest reported 72h ErC <sub>50</sub> and EbC <sub>50</sub> for <i>Pseudokirchneriella subcapitata</i> are >10 (nom) in the RARs for chlorsulfuron and thifensulfuron-methyl. The lowest reported 72h ErC <sub>50</sub> and EbC <sub>50</sub> for <i>Scenedesmus subspicatus</i> are >90 (nom) in the RARs for prosulfuron and thifensulfuron-methyl |                                                                                                                                        |                                                                                       |                                                   |
| <i>Pseudokirchneriella subcapitata</i><br>Green algae                                       | IN-R9803<br>Tribenuron acid                                   | 72h (static)                                                                                                                                                                                                                                                                                                                                                                                                                                                                                                                                                | Growth rate,<br>NOEC<br><b>ErC<sub>50</sub></b><br>Biomass EC <sub>50</sub> <sup>1</sup>                                               | 0.366<br><b>8.48 (mm)</b><br>3.12                                                     | Limit test                                        |
| <i>Pseudokirchneriella subcapitata</i><br>Green algae                                       | IN-R9805 O-demethyl triazine amine                            | 72h (static)                                                                                                                                                                                                                                                                                                                                                                                                                                                                                                                                                | Growth rate,<br>ErC <sub>50</sub><br>Biomass EC <sub>50</sub> <sup>1</sup>                                                             | >100<br>>100                                                                          | Limit test                                        |

| Test species                                          | Test substance                        | Time-scale                                                                                                                                                                                                                                                                                                                                                                                                                                                                                                                                                                                                                                 | Endpoint                                                                                                                               | Toxicity <sup>a</sup><br>mg/L                                                                                                                                      | Remark                                                                                                                |
|-------------------------------------------------------|---------------------------------------|--------------------------------------------------------------------------------------------------------------------------------------------------------------------------------------------------------------------------------------------------------------------------------------------------------------------------------------------------------------------------------------------------------------------------------------------------------------------------------------------------------------------------------------------------------------------------------------------------------------------------------------------|----------------------------------------------------------------------------------------------------------------------------------------|--------------------------------------------------------------------------------------------------------------------------------------------------------------------|-----------------------------------------------------------------------------------------------------------------------|
| <i>Pseudokirchneriella subcapitata</i><br>Green algae | IN-R9805 O-demethyl triazine amine    | 72h (static)                                                                                                                                                                                                                                                                                                                                                                                                                                                                                                                                                                                                                               | Growth rate<br>NOEC<br>ErC <sub>10</sub><br>ErC <sub>20</sub><br><b>ErC<sub>50</sub></b><br>Biomass EbC <sub>50</sub> <sup>1</sup>     | 22<br>42<br>64<br><b>142 (nom)</b><br>53                                                                                                                           |                                                                                                                       |
| <i>Pseudokirchneriella subcapitata</i><br>Green algae | IN-GN815                              | 72h (static)                                                                                                                                                                                                                                                                                                                                                                                                                                                                                                                                                                                                                               | Growth rate, ErC <sub>50</sub> ,<br>Biomass, EC <sub>50</sub> <sup>1</sup>                                                             | <b>&gt;120 (nom)</b><br>>120                                                                                                                                       |                                                                                                                       |
| <i>Pseudokirchneriella subcapitata</i><br>Green algae | IN-GN815                              | 72h (static)                                                                                                                                                                                                                                                                                                                                                                                                                                                                                                                                                                                                                               | Growth rate, ErC <sub>50</sub> ,<br>Biomass, EC <sub>50</sub> <sup>1</sup>                                                             | >100 (nom)<br>>100                                                                                                                                                 |                                                                                                                       |
| <i>Pseudokirchneriella subcapitata</i><br>Green algae | IN-GK521                              | 72h (static)                                                                                                                                                                                                                                                                                                                                                                                                                                                                                                                                                                                                                               | Growth rate, ErC <sub>50</sub> ,<br>Biomass, EC <sub>50</sub> <sup>1</sup>                                                             | >100 (nom)<br>>100                                                                                                                                                 |                                                                                                                       |
| <i>Pseudokirchneriella subcapitata</i><br>Green algae | IN-GK521                              | 72h (static)                                                                                                                                                                                                                                                                                                                                                                                                                                                                                                                                                                                                                               | Growth rate<br>NOEC<br>ErC <sub>10</sub><br>ErC <sub>20</sub><br><b>ErC<sub>50</sub></b><br>Biomass EbC <sub>50</sub> <sup>1</sup>     | 0.95<br>1.60<br>3.27<br><b>12.9 (nom)</b><br>2.95                                                                                                                  |                                                                                                                       |
| <i>Pseudokirchneriella subcapitata</i><br>Green algae | IN-D5803 Sulfonamide, methylsaccharin | 72h (static)                                                                                                                                                                                                                                                                                                                                                                                                                                                                                                                                                                                                                               | Growth rate<br>NOEC<br>ErC <sub>10</sub><br>ErC <sub>20</sub><br><b>ErC<sub>50</sub></b><br><br>Biomass EbC <sub>50</sub> <sup>1</sup> | Numerical NOEC-value cannot be assigned.<br><br><b>&gt;19.7</b> (geometric mean of measured initial and measured at highest test concentration after 72h)<br>>19.7 | Measured concentrations at the end of the test were below LOD (0.006 mg/L) in all but the highest test concentration. |
| <i>Pseudokirchneriella subcapitata</i><br>Green algae | IN-D5803 Sulfonamide, methylsaccharin | This metabolite was also evaluated for metsulfuron-methyl. The lowest reported 72h ErC <sub>50</sub> and EbC <sub>50</sub> for <i>Pseudokirchneriella subcapitata</i> are >3.46 mg/L (nom). However, it is the same study as used in the present report, which was not regarded as valid due to deficiencies in recovery and analytics of the test substance. It is noted that the peer review of metsulfuron-methyl was performed before the publication of the technical report of the peer review expert meeting 133 which included guidance on endpoints derivations when the concentration of the active substance is not maintained. |                                                                                                                                        |                                                                                                                                                                    |                                                                                                                       |
| <i>Pseudokirchneriella subcapitata</i><br>Green algae | M2 Triazine urea                      | 72h (static)                                                                                                                                                                                                                                                                                                                                                                                                                                                                                                                                                                                                                               | Growth rate, <b>ErC<sub>50</sub></b> ,<br>Biomass, EC <sub>50</sub> <sup>1</sup>                                                       | <b>&gt;100 (nom)</b><br>>100                                                                                                                                       |                                                                                                                       |
| <i>Pseudokirchneriella subcapitata</i>                | IN-D5119 Acid sulfonamide             | 72h (static)                                                                                                                                                                                                                                                                                                                                                                                                                                                                                                                                                                                                                               | Growth rate, <b>ErC<sub>50</sub></b> ,<br>Biomass, EC <sub>50</sub> <sup>1</sup>                                                       | <b>&gt;10 (mm)</b><br>>10                                                                                                                                          | Limit test                                                                                                            |
| <i>Pseudokirchneriella subcapitata</i><br>Green algae | IN-L5296 Methyl triazine amine        | 72h (static)                                                                                                                                                                                                                                                                                                                                                                                                                                                                                                                                                                                                                               | Growth rate, <b>ErC<sub>50</sub></b> ,<br>Biomass, EC <sub>50</sub> <sup>1</sup>                                                       | <b>&gt;10 (nom)</b><br>>10                                                                                                                                         | Limit test                                                                                                            |
| <i>Anabaena flos-aquae</i><br>Cyanobacteria           | Tribenuron-methyl                     | 72h (static)                                                                                                                                                                                                                                                                                                                                                                                                                                                                                                                                                                                                                               | Growth rate,<br>NOEC<br><b>ErC<sub>50</sub></b><br>Biomass EyC <sub>50</sub> <sup>1</sup>                                              | 10,<br><b>&gt;100 (nom)</b><br>62.5                                                                                                                                |                                                                                                                       |
| <b>Higher plants</b>                                  |                                       |                                                                                                                                                                                                                                                                                                                                                                                                                                                                                                                                                                                                                                            |                                                                                                                                        |                                                                                                                                                                    |                                                                                                                       |
| <i>Lemna gibba</i><br>Duck weed                       | Tribenuron-methyl                     | 7d (static)                                                                                                                                                                                                                                                                                                                                                                                                                                                                                                                                                                                                                                | Growth rate,<br>NOErC<br>ErC <sub>10</sub> ,<br>ErC <sub>20</sub> ,<br><b>ErC<sub>50</sub></b>                                         | 0.001<br>0.0024<br>0.0039<br><b>0.0047 (nom)</b>                                                                                                                   |                                                                                                                       |



| Test species                    | Test substance                   | Time-scale                           | Endpoint                                  | Toxicity <sup>a</sup><br>mg/L | Remark                                                                                                                                                                                                                               |
|---------------------------------|----------------------------------|--------------------------------------|-------------------------------------------|-------------------------------|--------------------------------------------------------------------------------------------------------------------------------------------------------------------------------------------------------------------------------------|
| <i>Lemna gibba</i><br>Duck weed | Tribenuron-methyl                | 7d, 12h exposure (static)            | Growth rate (frond count), NOECr          | 0.1                           | Higher tier study which may be applicable if appropriate exposure scenarios are provided.<br><br>It should be noted, though, that this kind of refinement would not be accepted for product authorisations within the Northern Zone. |
|                                 |                                  |                                      | ErC <sub>10</sub>                         | 0.005                         |                                                                                                                                                                                                                                      |
|                                 |                                  |                                      | ErC <sub>20</sub>                         | 0.17                          |                                                                                                                                                                                                                                      |
|                                 |                                  |                                      | ErC <sub>50</sub>                         | >0.625                        |                                                                                                                                                                                                                                      |
|                                 |                                  |                                      | Yield (frond count)                       |                               |                                                                                                                                                                                                                                      |
|                                 |                                  |                                      | EyC <sub>50</sub> <sup>1</sup>            | 0.460                         |                                                                                                                                                                                                                                      |
|                                 |                                  | 7d, 24h exposure (static)            | Growth rate (frond count), NOECr          | 0.006                         |                                                                                                                                                                                                                                      |
|                                 |                                  |                                      | ErC <sub>10</sub>                         | 0.004                         |                                                                                                                                                                                                                                      |
|                                 |                                  |                                      | ErC <sub>20</sub>                         | 0.011                         |                                                                                                                                                                                                                                      |
|                                 |                                  |                                      | ErC <sub>50</sub>                         | >0.250                        |                                                                                                                                                                                                                                      |
|                                 |                                  |                                      | Yield (frond count)                       |                               |                                                                                                                                                                                                                                      |
|                                 |                                  |                                      | EyC <sub>50</sub> <sup>1</sup>            | 0.047                         |                                                                                                                                                                                                                                      |
|                                 |                                  | 7d, 48h exposure (static)            | Growth rate (frond count), NOECr          | 0.006                         |                                                                                                                                                                                                                                      |
|                                 |                                  |                                      | ErC <sub>10</sub>                         | 0.003                         |                                                                                                                                                                                                                                      |
|                                 |                                  |                                      | ErC <sub>20</sub>                         | 0.007                         |                                                                                                                                                                                                                                      |
|                                 |                                  |                                      | ErC <sub>50</sub>                         | >0.100                        |                                                                                                                                                                                                                                      |
| Yield (frond count)             |                                  |                                      |                                           |                               |                                                                                                                                                                                                                                      |
| EyC <sub>50</sub> <sup>1</sup>  | 0.011                            |                                      |                                           |                               |                                                                                                                                                                                                                                      |
| 7d, 96h exposure (static)       | Growth rate (frond count), NOECr | 0.001                                |                                           |                               |                                                                                                                                                                                                                                      |
|                                 | ErC <sub>10</sub>                | 0.001                                |                                           |                               |                                                                                                                                                                                                                                      |
|                                 | ErC <sub>20</sub>                | 0.002                                |                                           |                               |                                                                                                                                                                                                                                      |
|                                 | ErC <sub>50</sub>                | 0.016 (mm)                           |                                           |                               |                                                                                                                                                                                                                                      |
|                                 | Yield (frond count)              |                                      |                                           |                               |                                                                                                                                                                                                                                      |
|                                 | EyC <sub>50</sub> <sup>1</sup>   | 0.0029                               |                                           |                               |                                                                                                                                                                                                                                      |
| <i>Lemna gibba</i><br>Duck weed | Tribenuron-methyl                | 16d low temperature (8°C), (static)  | Growth rate days 9-19 (frond count), NOEC | 0.036                         | Higher tier study simulating exposure during dormancy. Not accepted for refinement at the PPR 157 meeting for tribenuron-methyl.                                                                                                     |
|                                 |                                  |                                      | ErC <sub>10</sub>                         | 0.080                         |                                                                                                                                                                                                                                      |
|                                 |                                  |                                      | ErC <sub>20</sub>                         | 0.327                         |                                                                                                                                                                                                                                      |
|                                 |                                  |                                      | ErC <sub>50</sub>                         | >0.401 (mm)                   |                                                                                                                                                                                                                                      |
|                                 |                                  |                                      | Yield (frond count)                       |                               |                                                                                                                                                                                                                                      |
|                                 |                                  |                                      | EyC <sub>50</sub> <sup>1</sup>            | 0.349                         |                                                                                                                                                                                                                                      |
| <i>Lemna gibba</i><br>Duck weed | Tribenuron-methyl                | 16d low temperature (12°C), (static) | Growth rate days 0-9 (frond count), NOEC  | 0.0041                        | Higher tier study simulating exposure during dormancy. Not accepted for refinement at the PPR 157 meeting for tribenuron-methyl.                                                                                                     |
|                                 |                                  |                                      | ErC <sub>10</sub>                         | n.a.                          |                                                                                                                                                                                                                                      |
|                                 |                                  |                                      | ErC <sub>20</sub>                         | n.a.                          |                                                                                                                                                                                                                                      |
|                                 |                                  |                                      | <b>ErC<sub>50</sub></b>                   | <b>0.0062 (mm)</b>            |                                                                                                                                                                                                                                      |
|                                 |                                  |                                      |                                           |                               |                                                                                                                                                                                                                                      |
|                                 |                                  |                                      |                                           |                               |                                                                                                                                                                                                                                      |
| <i>Myriophyllum spicatum</i>    | Tribenuron-methyl                | 14d (static), with sediment          | Growth rate, NOEC                         | 94                            |                                                                                                                                                                                                                                      |
|                                 |                                  |                                      | Necrosis, NOEC                            | 0.87                          |                                                                                                                                                                                                                                      |
|                                 |                                  |                                      | ErC <sub>10</sub>                         | 3.5                           |                                                                                                                                                                                                                                      |
|                                 |                                  |                                      | ErC <sub>20</sub>                         | 9.7                           |                                                                                                                                                                                                                                      |
|                                 |                                  |                                      | ErC <sub>50</sub>                         | >94                           |                                                                                                                                                                                                                                      |
|                                 |                                  |                                      | Apical bud damage, NOEC                   | <0.0022 (mm)                  |                                                                                                                                                                                                                                      |
|                                 |                                  |                                      |                                           |                               |                                                                                                                                                                                                                                      |
|                                 |                                  |                                      |                                           |                               |                                                                                                                                                                                                                                      |

| Test species                    | Test substance                                   | Time-scale                  | Endpoint                                                                                                                                                                                                                              | Toxicity <sup>a</sup><br>mg/L                                                                                 | Remark |
|---------------------------------|--------------------------------------------------|-----------------------------|---------------------------------------------------------------------------------------------------------------------------------------------------------------------------------------------------------------------------------------|---------------------------------------------------------------------------------------------------------------|--------|
| <i>Myriophyllum spicatum</i>    | Tribenuron-methyl                                | 14d (static), with sediment | Growth rate (fresh weight),<br>NOEC<br>ErC <sub>10</sub><br>ErC <sub>20</sub><br>ErC <sub>50</sub>                                                                                                                                    | 0.00095<br>0.00081<br>0.0017<br>0.0065 (nom)                                                                  |        |
| <i>Elodea canadensis</i>        | Tribenuron-methyl                                | 14d (static), with sediment | Chlorosis, NOEC<br><br>Growth rate (biomass), NOEC<br><br>Shoot dry weight, NOEC                                                                                                                                                      | 1.0 (nom)<br><br>10<br><br>0.01                                                                               |        |
| <i>Lemna gibba</i><br>Duck weed | Tribenuron-methyl 50SG (DuPont)                  | 7d (static)                 | Growth rate (frond count),<br>NOEC<br>ErC <sub>10</sub><br>ErC <sub>20</sub><br><b>ErCr<sub>50</sub></b><br>Yield EyC <sub>50</sub> <sup>1</sup>                                                                                      | 0.001<br>0.0011<br>0.0017<br><b>0.0033</b> (a.s. nom)<br>Not reported at 7 d                                  |        |
| <i>Lemna gibba</i> Duck weed    | Tribenuron-methyl 50SG plus DPX-KG691 surfactant | 7d (static)                 | Growth rate (frond count)<br>NOEC<br>ErC <sub>10</sub><br>ErC <sub>20</sub><br><b>ErCr<sub>50</sub></b><br><br>Yield (frond count)<br>EyC <sub>50</sub> <sup>1</sup>                                                                  | 0.00063<br>0.0008<br>0.00134<br><b>0.0036</b> (a.s. methyl measured)<br><br>0.00199                           |        |
| <i>Lemna gibba</i> Duck weed    | Tribenuron-methyl 750 WG (Task Force)            | 7d (static)                 | Growth rate (frond count),<br>NOEC<br>ErC <sub>10</sub><br>ErC <sub>20</sub><br><b>ErCr<sub>50</sub></b><br>Yield (frond count)<br>EyC <sub>50</sub> <sup>1</sup>                                                                     | 0.00075<br>0.00067<br>0.0013<br><b>0.0029</b> (a.s. nom)<br><br>1.63 (a.s. nom)                               |        |
| <i>Myriophyllum spicatum</i>    | Tribenuron-methyl 750 WG (Task Force)            | 14d (static) sediment       | Growth rate (shoot fresh weight),<br>NOEC<br>ErC <sub>10</sub><br>ErC <sub>20</sub><br><b>ErCr<sub>50</sub></b><br><br>Yield <sup>1</sup> (shoot length)<br>NOEC,<br>ErC <sub>10</sub> ,<br>ErC <sub>20</sub> ,<br>ErCr <sub>50</sub> | 0.00072<br>0.00088<br>0.0019<br><b>0.0077</b><br><br>0.00095<br>0.00196<br>0.00267<br>0.0048<br><br>(a.s.nom) |        |
| <i>Lemna gibba</i> Duck weed    | IN-00581 = saccharin                             | 7d (static)                 | Growth rate (frond count)<br>NOEC<br>ErC <sub>10</sub><br>ErC <sub>20</sub><br><b>ErCr<sub>50</sub></b><br>Yield (frond count)<br>EyC <sub>50</sub> <sup>1</sup>                                                                      | 0.7<br>1.18<br>4.02<br><b>&gt;11 (mm)</b><br><br>>11                                                          |        |

| Test species                 | Test substance                                                | Time-scale   | Endpoint                                                                                                                                                        | Toxicity <sup>a</sup><br>mg/L                       | Remark                                                                                                                                                                                                                                                                                                                                                                                                                                                    |
|------------------------------|---------------------------------------------------------------|--------------|-----------------------------------------------------------------------------------------------------------------------------------------------------------------|-----------------------------------------------------|-----------------------------------------------------------------------------------------------------------------------------------------------------------------------------------------------------------------------------------------------------------------------------------------------------------------------------------------------------------------------------------------------------------------------------------------------------------|
| <i>Lemna gibba</i> Duck weed | IN-00581 = saccharin                                          |              |                                                                                                                                                                 |                                                     | This metabolite was also evaluated for metsulfuron-methyl, ethametsulfuron-methyl and propoxycarbazone-sodium (EFSA, 2015a; 2014a; 2016b). The lowest reported 14d EC <sub>50</sub> for Inhibition of no. healthy fronds is 5.48 mg/L (nom) in the RARs for ethametsulfuron-methyl. However, since the result was based on frond count and not on inhibition of growth rate, the value reported in the current assessment was used in the risk assessment |
| <i>Lemna gibba</i> Duck weed | IN-A4098 = N-demethyl triazine amine (AE F059411, CG A150829) | 7d (static)  | Growth rate (frond count),<br>NOEC<br>ErC <sub>10</sub><br>ErC <sub>20</sub><br><b>ErCr<sub>50</sub></b><br>Biomass EC <sub>50</sub> <sup>1</sup>               | 32<br><br><br><b>&gt;100 (nom)</b><br>>100          |                                                                                                                                                                                                                                                                                                                                                                                                                                                           |
| <i>Lemna gibba</i> Duck weed | IN-A4098 = N-demethyl triazine amine (AE F059411, CG A150829) | 14d (static) | Growth rate (frond count), ErCr <sub>50</sub><br>Biomass EC <sub>50</sub> <sup>1</sup>                                                                          | >10 (nom)<br>>10                                    | Limit test                                                                                                                                                                                                                                                                                                                                                                                                                                                |
| <i>Lemna gibba</i> Duck weed | IN-A4098 = N-demethyl triazine amine (AE F059411, CG A150829) | 7d (static)  | Growth rate (frond count), ErCr <sub>50</sub><br>Biomass EC <sub>50</sub> <sup>1</sup>                                                                          | >100 (nom)<br>>100                                  |                                                                                                                                                                                                                                                                                                                                                                                                                                                           |
| <i>Lemna gibba</i> Duck weed | IN-A4098 = N-demethyl triazine amine (AE F059411, CG A150829) | 7d (static)  | Growth rate (frond count)<br>NOEC<br>ErC <sub>10</sub><br>ErC <sub>20</sub><br><b>ErCr<sub>50</sub></b><br>Biomass EC <sub>50</sub> <sup>1</sup>                | 31<br>70<br>>100<br><b>&gt;100 (nom)</b><br>>100    |                                                                                                                                                                                                                                                                                                                                                                                                                                                           |
| <i>Lemna gibba</i> Duck weed | IN-A4098 = N-demethyl triazine amine (AE F059411, CG A150829) |              |                                                                                                                                                                 |                                                     | This metabolite was also evaluated for iodosulfuron-methyl-sodium, prosulfuron, triasulfuron, chlorsulfuron, thifensulfuron-methyl and metsulfuron-methyl (EFSA, 2008; 2014b; 2015a,b,c; 2016a,b). The lowest reported 7d or 14d EbC <sub>50</sub> and ErC <sub>50</sub> are >10 (nom) in several of the RARs.                                                                                                                                            |
| <i>Lemna gibba</i> Duck weed | IN-D5119 Acid sulfonamide                                     | 7d (static)  | Growth rate (frond count),<br>NOEC<br>ErC <sub>10</sub><br>ErC <sub>20</sub><br><b>ErCr<sub>50</sub></b><br>Biomass EC <sub>50</sub> <sup>1</sup>               | <0.7<br>1.17<br>11.19<br><b>&gt;11 (nom)</b><br>>11 |                                                                                                                                                                                                                                                                                                                                                                                                                                                           |
| <i>Lemna gibba</i> Duck weed | IN-L5296 Methyl triazine amine                                | 14d (static) | Growth rate (frond count), <b>ErCr<sub>50</sub></b><br>Biomass EC <sub>50</sub> <sup>1</sup>                                                                    | <b>&gt;10 (nom)</b><br>>10                          | Limit test                                                                                                                                                                                                                                                                                                                                                                                                                                                |
| <i>Lemna gibba</i> Duck weed | IN-R9803 Tribenuron acid                                      | 7d (static)  | Growth rate (frond count)<br>NOEC<br>ErC <sub>10</sub><br>ErC <sub>20</sub><br><b>ErCr<sub>50</sub></b><br>Yield (frond count)<br>EC <sub>50</sub> <sup>1</sup> | 3.2<br>5.64<br>7.60<br><b>13.5 (mm)</b><br>7.93     |                                                                                                                                                                                                                                                                                                                                                                                                                                                           |
| <i>Lemna gibba</i> Duck weed | IN-R9805 O-demethyl triazine amine                            | 14d (static) | Growth rate (frond count) ErCr <sub>50</sub><br>Biomass EC <sub>50</sub> <sup>1</sup>                                                                           | >100 (nom)<br>>100                                  | Limit test                                                                                                                                                                                                                                                                                                                                                                                                                                                |
| <i>Lemna gibba</i> Duck weed | IN-R9805 O-demethyl triazine amine                            | 7d (static)  | Growth rate (frond count), <b>ErCr<sub>50</sub></b><br>Yield EC <sub>50</sub> <sup>1</sup>                                                                      | <b>&gt;100 (nom)</b><br>>100                        |                                                                                                                                                                                                                                                                                                                                                                                                                                                           |

| Test species                    | Test substance                              | Time-scale                                                                                                                                                                                                                                                                                                                                                                                                                                                                                                                                                                                                                                                                                                         | Endpoint                                                                                                                                                             | Toxicity <sup>a</sup><br>mg/L                                                                                              | Remark                                                                                                                                                                                                                                                                                                 |
|---------------------------------|---------------------------------------------|--------------------------------------------------------------------------------------------------------------------------------------------------------------------------------------------------------------------------------------------------------------------------------------------------------------------------------------------------------------------------------------------------------------------------------------------------------------------------------------------------------------------------------------------------------------------------------------------------------------------------------------------------------------------------------------------------------------------|----------------------------------------------------------------------------------------------------------------------------------------------------------------------|----------------------------------------------------------------------------------------------------------------------------|--------------------------------------------------------------------------------------------------------------------------------------------------------------------------------------------------------------------------------------------------------------------------------------------------------|
| <i>Lemna gibba</i><br>Duck weed | IN-GN815                                    | 7d (static)                                                                                                                                                                                                                                                                                                                                                                                                                                                                                                                                                                                                                                                                                                        | Growth rate (frond count)<br>NOEC<br>ErC <sub>10</sub><br>ErC <sub>20</sub><br><b>ErCr<sub>50</sub></b><br>Yield (dry weight)<br>EC <sub>50</sub> <sup>1</sup>       | 1.2<br>6.4<br>38.4<br><b>&gt;120 (nom)</b><br>26                                                                           |                                                                                                                                                                                                                                                                                                        |
| <i>Lemna gibba</i><br>Duck weed | IN-GN815                                    | 7d (static)                                                                                                                                                                                                                                                                                                                                                                                                                                                                                                                                                                                                                                                                                                        | Growth rate (frond count)<br>NOEC<br>ErC <sub>10</sub><br>ErC <sub>20</sub><br>ErCr <sub>50</sub><br>Yield (dry weight)<br>EC <sub>50</sub> <sup>1</sup>             | 10<br>27<br>>100<br>>100 (nom)<br>99                                                                                       |                                                                                                                                                                                                                                                                                                        |
| <i>Lemna gibba</i><br>Duck weed | IN-GK521                                    | 7d (static)                                                                                                                                                                                                                                                                                                                                                                                                                                                                                                                                                                                                                                                                                                        | Growth rate (frond count)<br>NOEC<br>ErC <sub>10</sub><br>ErC <sub>20</sub><br>ErCr <sub>50</sub><br>Yield (dry weight)<br>EC <sub>50</sub> <sup>1</sup>             | 4.43<br>4.96<br>7.17<br>12.95 (mm)<br>7.71                                                                                 |                                                                                                                                                                                                                                                                                                        |
| <i>Lemna gibba</i><br>Duck weed | IN-GK521                                    | 7d (static)                                                                                                                                                                                                                                                                                                                                                                                                                                                                                                                                                                                                                                                                                                        | Growth rate (frond count),<br>NOEC<br>ErC <sub>10</sub> ,<br>ErC <sub>20</sub> ,<br><b>ErCr<sub>50</sub></b><br>Yield (frond count)<br>EC <sub>50</sub> <sup>1</sup> | 0.03<br>0.07<br>0.11<br><b>0.29 (nom)</b><br>0.125                                                                         |                                                                                                                                                                                                                                                                                                        |
| <i>Lemna gibba</i><br>Duck weed | IN-D5803<br>Sulfonamide,<br>methylsaccharin | 7d (static)                                                                                                                                                                                                                                                                                                                                                                                                                                                                                                                                                                                                                                                                                                        | Growth rate (frond count),<br>NOEC<br>ErC <sub>10</sub><br><b>ErC<sub>20</sub></b><br><br>ErC <sub>50</sub>                                                          | 0.3<br>approx. 0.9<br><b>10</b> (nominal degradation product saccharine)<br><br>ErC <sub>50</sub> calculation not possible | Results are based on measured concentrations of the metabolite saccharine since methylsaccharine hydrolyses rapidly to saccharin. Growth inhibition peaked at 20% at 10 mg/L. Therefore, an ErC <sub>50</sub> cannot be determined. <b>ErC<sub>20</sub> is hence selected for the risk assessment.</b> |
| <i>Lemna gibba</i><br>Duck weed | IN-D5803<br>Sulfonamide,<br>methylsaccharin | This metabolite also evaluated for metsulfuron-methyl and ethametsulfuron-methyl (EFSA, 2014a, 2015a). The metsulfuron-methyl studies appear to be the same as evaluated in this RAR. The same problems with instability of the substance were encountered. However, it appears that this was not taken into account that the inhibition has a bell-shaped dose-response relation, meaning that EC <sub>50</sub> values cannot be derived. The lowest EC <sub>50</sub> (fronds and biomass) was >1.36 mg/L (mm) reported in the RAR for ethametsulfuron-methyl. However, since that value was not based on inhibition of growth rate, the value reported in the current assessment was used in the risk assessment |                                                                                                                                                                      |                                                                                                                            |                                                                                                                                                                                                                                                                                                        |
| <i>Lemna gibba</i><br>Duck weed | M2 Triazine<br>urea                         | 7d (static)                                                                                                                                                                                                                                                                                                                                                                                                                                                                                                                                                                                                                                                                                                        | Growth rate (frond count)<br>NOEC<br>ErC <sub>10</sub><br>ErC <sub>20</sub><br><b>ErCr<sub>50</sub></b><br>Yield EC <sub>50</sub> <sup>1</sup>                       | 40<br>>100<br>>100<br><b>&gt;100 (nom)</b><br>>100                                                                         |                                                                                                                                                                                                                                                                                                        |

<sup>a)</sup> (nom) nominal concentration; (mm) mean measured concentration

<sup>1)</sup> Endpoints based on biomass have been included in line with the agreements at the pesticide peer review meeting 133.

**Bioconcentration in fish (Annex Part A, point 8.2.2.3)**

The Log Pow for tribenuron-methyl and the metabolites relevant for the environment were below 3. Hence, bioconcentration is expected to be low.

## Toxicity/exposure ratios for the most sensitive aquatic organisms (Regulation (EU) N° 284/2013, Annex Part A, point 10.2)

## Acute and chronic toxicity of tribenuron-methyl to aquatic organisms for calculation of tier 1 RAC

| Tribenuron-methyl         | Standard test species                  | Duration                      | Endpoint                                     | Value (mg a.s./L)           | Calculation of RAC (mg a.s./L)             |                            | Acute RAC (µg a.s./L) | Chronic RAC (µg a.s./L) |  |
|---------------------------|----------------------------------------|-------------------------------|----------------------------------------------|-----------------------------|--------------------------------------------|----------------------------|-----------------------|-------------------------|--|
| Acute effect assessment   | <b>Fish</b>                            |                               |                                              |                             |                                            |                            |                       |                         |  |
|                           | <i>Oncorhynchus mykiss</i>             | 96h                           | LC <sub>50</sub>                             | 738                         | LC <sub>50</sub> /100                      | 7.38                       | 270                   | 0.47                    |  |
|                           | <b>Invertebrates</b>                   |                               |                                              |                             |                                            |                            |                       |                         |  |
| <i>Daphnia magna</i>      | 48h                                    | EC <sub>50</sub>              | a.s.: >894<br>DUP: 33*<br>TTF: 27*           | EC <sub>50</sub> /100       | DUP: 0.33<br>TTF: 0.27                     |                            |                       |                         |  |
| Chronic effect assessment | <b>Fish</b>                            |                               |                                              |                             |                                            |                            |                       |                         |  |
|                           | <i>Oncorhynchus mykiss</i>             | 28d                           | NOEC larval growth                           | 11.9                        | NOEC/10                                    | 1.19                       | 0.47                  |                         |  |
|                           | <b>Invertebrates</b>                   |                               |                                              |                             |                                            |                            |                       |                         |  |
|                           | <i>Daphnia magna</i>                   | 21d                           | EC <sub>10</sub> reproduction                | 52                          | NOEC/10                                    | 5.2                        |                       |                         |  |
|                           | <b>Algae</b>                           |                               |                                              |                             |                                            |                            |                       |                         |  |
|                           | <i>Pseudokirchneriella subcapitata</i> | 72h                           | ErC <sub>50</sub>                            | DUP: 0.017 *<br>a.s.: 0.068 | ECr <sub>50</sub> /10                      | DUP: 0.0017<br>TTF: 0.0068 |                       |                         |  |
| <b>Macrophyta</b>         |                                        |                               |                                              |                             |                                            |                            |                       |                         |  |
| <i>Lemna gibba</i>        | 7d                                     | ErC <sub>50</sub> frond count | a.s.: 0.0047<br>DUP: 0.0033*<br>TTF: 0.0029* | ECr <sub>50</sub> /10       | <b>DUP: 0.00033</b><br><b>TTF: 0.00029</b> |                            |                       |                         |  |

\* based on a study with the representative formulation, possibly including contribution from co-formulant(s).

**Acute and chronic toxicity of IN-L5296 to aquatic organisms for calculation of tier 1 RAC**

| IN-L5296                  | Standard test species      | Duration                               | Endpoint                      | Value (mg a.s./L) | Calculation of RAC (mg a.s./L) |                       | Acute RAC (µg a.s./L) | Chronic RAC (µg a.s./L) |     |
|---------------------------|----------------------------|----------------------------------------|-------------------------------|-------------------|--------------------------------|-----------------------|-----------------------|-------------------------|-----|
| Acute effect assessment   | <b>Fish</b>                |                                        |                               |                   |                                |                       | 1720                  | 1000                    |     |
|                           | <i>Oncorhynchus mykiss</i> | 96h                                    | LC <sub>50</sub>              | 172               | LC <sub>50</sub> /100          | 1.72                  |                       |                         |     |
|                           | <b>Invertebrates</b>       |                                        |                               |                   |                                |                       |                       |                         |     |
|                           | <i>Daphnia magna</i>       | 48h                                    | EC <sub>50</sub>              | >1020             | EC <sub>50</sub> /100          | 10.2                  |                       |                         |     |
| Chronic effect assessment | <b>Fish</b>                |                                        |                               |                   |                                |                       | 1000                  |                         |     |
|                           | <i>Oncorhynchus mykiss</i> | 28d                                    | NOEC larval growth            | 11.9*             | NOEC/10                        | 1.19                  |                       |                         |     |
|                           | <b>Invertebrates</b>       |                                        |                               |                   |                                |                       |                       |                         |     |
|                           |                            | <i>Daphnia magna</i>                   | 21d                           | NOEC growth       | 49                             | NOEC/10               |                       |                         | 4.9 |
|                           | <b>Algae</b>               |                                        |                               |                   |                                |                       |                       |                         |     |
|                           |                            | <i>Pseudokirchneriella subcapitata</i> | 72h                           | ErC <sub>50</sub> | >10                            | ECr <sub>50</sub> /10 |                       | 1.0                     |     |
|                           | <b>Macrophyta</b>          |                                        |                               |                   |                                |                       |                       |                         |     |
|                           | <i>Lemna gibba</i>         | 14d                                    | ErC <sub>50</sub> frond count | >10               | ECr <sub>50</sub> /10          | 1.0                   |                       |                         |     |

\* No test available. Endpoint was derived by assuming the toxicity of the metabolite equal to the active substance

**Acute and chronic toxicity of IN-A4098 to aquatic organisms for calculation of tier 1 RAC**

| IN-A4098                  | Standard test species      | Duration                               | Endpoint                      | Value (mg a.s./L)  | Calculation of RAC (mg a.s./L) |                       | Acute RAC (µg a.s./L) | Chronic RAC (µg a.s./L) |
|---------------------------|----------------------------|----------------------------------------|-------------------------------|--------------------|--------------------------------|-----------------------|-----------------------|-------------------------|
| Acute effect assessment   | <b>Fish</b>                |                                        |                               |                    |                                |                       | 9.3                   | 9000                    |
|                           | <i>Oncorhynchus mykiss</i> | 96h                                    | LC <sub>50</sub>              | >200               | LC <sub>50</sub> /100          | 2                     |                       |                         |
|                           | <i>Oncorhynchus mykiss</i> | 96h                                    | LC <sub>50</sub>              | >0.93 <sup>#</sup> | LC <sub>50</sub> /100          | 0.0093                |                       |                         |
|                           | <b>Invertebrates</b>       |                                        |                               |                    |                                |                       |                       |                         |
|                           | <i>Daphnia magna</i>       | 48h                                    | EC <sub>50</sub>              | >99                | EC <sub>50</sub> /100          | 0.99                  |                       |                         |
| Chronic effect assessment | <b>Fish</b>                |                                        |                               |                    |                                |                       | 9000                  |                         |
|                           | <i>Oncorhynchus mykiss</i> | 28d                                    | NOEC larval growth            | 11.9*              | NOEC/10                        | 1.19                  |                       |                         |
|                           | <b>Invertebrates</b>       |                                        |                               |                    |                                |                       |                       |                         |
|                           |                            | <i>Daphnia magna</i>                   | 21d                           | NOEC growth rate   | 97                             | NOEC/10               |                       |                         |
|                           | <b>Algae</b>               |                                        |                               |                    |                                |                       |                       |                         |
|                           |                            | <i>Pseudokirchneriella subcapitata</i> | 72h                           | ErC <sub>50</sub>  | >90                            | ECr <sub>50</sub> /10 |                       | 9                       |
|                           | <b>Macrophyta</b>          |                                        |                               |                    |                                |                       |                       |                         |
|                           | <i>Lemna gibba</i>         | 7d                                     | ErC <sub>50</sub> frond count | >100               | ECr <sub>50</sub> /10          | 10                    |                       |                         |

<sup>#</sup> This metabolite was also evaluated for prosulfuron, triasulfu-ron, chlorsulfuron, thifensulfuron-methyl and metsulfuron-methyl (EFSA, 2014b, 2015a,b,c, 2008) . The lowest re-ported 96h LC<sub>50</sub> >0.93 mg/L (mm).

\* No test available. Endpoint was derived by assuming the toxicity of the metabolite equal to the active substance

## Acute and chronic toxicity of IN-00581 to aquatic organisms for calculation of tier 1 RAC

| IN-00581                  | Standard test species      | Duration                               | Endpoint                      | Value (mg a.s./L)             | Calculation of RAC (mg a.s./L) |                       | Acute RAC (µg a.s./L) | Chronic RAC (µg a.s./L) |     |
|---------------------------|----------------------------|----------------------------------------|-------------------------------|-------------------------------|--------------------------------|-----------------------|-----------------------|-------------------------|-----|
| Acute effect assessment   | <b>Fish</b>                |                                        |                               |                               |                                |                       | 1180                  | 1000                    |     |
|                           | <i>Oncorhynchus mykiss</i> | 96h                                    | LC <sub>50</sub>              | >124                          | LC <sub>50</sub> /100          | 1.24                  |                       |                         |     |
|                           | <b>Invertebrates</b>       |                                        |                               |                               |                                |                       |                       |                         |     |
|                           | <i>Daphnia magna</i>       | 48h                                    | EC <sub>50</sub>              | >118                          | EC <sub>50</sub> /100          | 1.18                  |                       |                         |     |
| Chronic effect assessment | <b>Fish</b>                |                                        |                               |                               |                                |                       | 1000                  |                         |     |
|                           | <i>Oncorhynchus mykiss</i> | 28d                                    | NOEC larval growth            | 11.9*                         | NOEC/10                        | 1.19                  |                       |                         |     |
|                           | <b>Invertebrates</b>       |                                        |                               |                               |                                |                       |                       |                         |     |
|                           |                            | <i>Daphnia magna</i>                   | 21d                           | EC <sub>10</sub> reproduction | 52*                            | NOEC/10               |                       |                         | 5.2 |
|                           | <b>Algae</b>               |                                        |                               |                               |                                |                       |                       |                         |     |
|                           |                            | <i>Pseudokirchmeriella subcapitata</i> | 72h                           | ErC <sub>50</sub>             | >10                            | EC <sub>r50</sub> /10 |                       | 1                       |     |
|                           | <b>Macrophyta</b>          |                                        |                               |                               |                                |                       |                       |                         |     |
|                           | <i>Lemna gibba</i>         | 7d                                     | ErC <sub>50</sub> frond count | >11                           | EC <sub>r50</sub> /10          | 1.1                   |                       |                         |     |

\* No test available. Endpoint was derived by assuming the toxicity of the metabolite equal to the active substance

## Acute and chronic toxicity of IN-GK521 to aquatic organisms for calculation of tier 1 RAC

| IN-GK521                  | Standard test species      | Duration                               | Endpoint                      | Value (mg a.s./L)             | Calculation of RAC (mg a.s./L) |                       | Acute RAC (µg a.s./L) | Chronic RAC (µg a.s./L) |     |
|---------------------------|----------------------------|----------------------------------------|-------------------------------|-------------------------------|--------------------------------|-----------------------|-----------------------|-------------------------|-----|
| Acute effect assessment   | <b>Fish</b>                |                                        |                               |                               |                                |                       | 230                   | 29                      |     |
|                           | <i>Oncorhynchus mykiss</i> | 96h                                    | LC <sub>50</sub>              | 738*                          | LC <sub>50</sub> /100          | 7.38                  |                       |                         |     |
|                           | <b>Invertebrates</b>       |                                        |                               |                               |                                |                       |                       |                         |     |
|                           | <i>Daphnia magna</i>       | 48h                                    | EC <sub>50</sub>              | 23*                           | EC <sub>50</sub> /100          | 0.23                  |                       |                         |     |
| Chronic effect assessment | <b>Fish</b>                |                                        |                               |                               |                                |                       | 29                    |                         |     |
|                           | <i>Oncorhynchus mykiss</i> | 28d                                    | NOEC larval growth            | 11.9*                         | NOEC/10                        | 1.19                  |                       |                         |     |
|                           | <b>Invertebrates</b>       |                                        |                               |                               |                                |                       |                       |                         |     |
|                           |                            | <i>Daphnia magna</i>                   | 21d                           | EC <sub>10</sub> reproduction | 52*                            | NOEC/10               |                       |                         | 5.2 |
|                           | <b>Algae</b>               |                                        |                               |                               |                                |                       |                       |                         |     |
|                           |                            | <i>Pseudokirchmeriella subcapitata</i> | 72h                           | ErC <sub>50</sub>             | 12.9                           | EC <sub>r50</sub> /10 |                       | 1.29                    |     |
|                           | <b>Macrophyta</b>          |                                        |                               |                               |                                |                       |                       |                         |     |
|                           | <i>Lemna gibba</i>         | 7d                                     | ErC <sub>50</sub> frond count | 0.29                          | EC <sub>r50</sub> /10          | 0.029                 |                       |                         |     |

\* No test available. Endpoint was derived by assuming the toxicity of the metabolite equal to the active substance



## Acute and chronic toxicity of IN-R9805 to aquatic organisms for calculation of tier 1 RAC

| IN-R9805                  | Standard test species      | Duration                               | Endpoint                      | Value (mg a.s./L)             | Calculation of RAC (mg a.s./L) |                       | Acute RAC (µg a.s./L) | Chronic RAC (µg a.s./L) |     |
|---------------------------|----------------------------|----------------------------------------|-------------------------------|-------------------------------|--------------------------------|-----------------------|-----------------------|-------------------------|-----|
| Acute effect assessment   | <b>Fish</b>                |                                        |                               |                               |                                |                       | 230                   | 1190                    |     |
|                           | <i>Oncorhynchus mykiss</i> | 96h                                    | LC <sub>50</sub>              | 738*                          | LC <sub>50</sub> /100          | 7.38                  |                       |                         |     |
|                           | <b>Invertebrates</b>       |                                        |                               |                               |                                |                       |                       |                         |     |
|                           | <i>Daphnia magna</i>       | 48h                                    | EC <sub>50</sub>              | 23*                           | EC <sub>50</sub> /100          | 0.23                  |                       |                         |     |
| Chronic effect assessment | <b>Fish</b>                |                                        |                               |                               |                                |                       | 1190                  |                         |     |
|                           | <i>Oncorhynchus mykiss</i> | 28d                                    | NOEC larval growth            | 11.9*                         | NOEC/10                        | 1.19                  |                       |                         |     |
|                           | <b>Invertebrates</b>       |                                        |                               |                               |                                |                       |                       |                         |     |
|                           |                            | <i>Daphnia magna</i>                   | 21d                           | EC <sub>10</sub> reproduction | 52*                            | NOEC/10               |                       |                         | 5.2 |
|                           | <b>Algae</b>               |                                        |                               |                               |                                |                       |                       |                         |     |
|                           |                            | <i>Pseudokirchmeriella subcapitata</i> | 72h                           | ErC <sub>50</sub>             | 142                            | EC <sub>r50</sub> /10 |                       | 14.2                    |     |
|                           | <b>Macrophyta</b>          |                                        |                               |                               |                                |                       |                       |                         |     |
|                           | <i>Lemna gibba</i>         | 7d                                     | ErC <sub>50</sub> frond count | >100                          | EC <sub>r50</sub> /10          | 10                    |                       |                         |     |

\* No test available. Endpoint was derived by assuming the toxicity of the metabolite equal to the active substance

## Acute and chronic toxicity of IN-D5119 to aquatic organisms for calculation of tier 1 RAC

| IN-D5119                  | Standard test species      | Duration                               | Endpoint                      | Value (mg a.s./L)             | Calculation of RAC (mg a.s./L) |                       | Acute RAC (µg a.s./L) | Chronic RAC (µg a.s./L) |     |
|---------------------------|----------------------------|----------------------------------------|-------------------------------|-------------------------------|--------------------------------|-----------------------|-----------------------|-------------------------|-----|
| Acute effect assessment   | <b>Fish</b>                |                                        |                               |                               |                                |                       | 1150                  | 1000                    |     |
|                           | <i>Oncorhynchus mykiss</i> | 96h                                    | LC <sub>50</sub>              | >115                          | LC <sub>50</sub> /100          | 1.15                  |                       |                         |     |
|                           | <b>Invertebrates</b>       |                                        |                               |                               |                                |                       |                       |                         |     |
|                           | <i>Daphnia magna</i>       | 48h                                    | EC <sub>50</sub>              | >120                          | EC <sub>50</sub> /100          | 1.2                   |                       |                         |     |
| Chronic effect assessment | <b>Fish</b>                |                                        |                               |                               |                                |                       | 1000                  |                         |     |
|                           | <i>Oncorhynchus mykiss</i> | 28d                                    | NOEC larval growth            | 11.9*                         | NOEC/10                        | 1.19                  |                       |                         |     |
|                           | <b>Invertebrates</b>       |                                        |                               |                               |                                |                       |                       |                         |     |
|                           |                            | <i>Daphnia magna</i>                   | 21d                           | EC <sub>10</sub> reproduction | 52*                            | NOEC/10               |                       |                         | 5.2 |
|                           | <b>Algae</b>               |                                        |                               |                               |                                |                       |                       |                         |     |
|                           |                            | <i>Pseudokirchmeriella subcapitata</i> | 72h                           | ErC <sub>50</sub>             | >10                            | EC <sub>r50</sub> /10 |                       | 1                       |     |
|                           | <b>Macrophyta</b>          |                                        |                               |                               |                                |                       |                       |                         |     |
|                           | <i>Lemna gibba</i>         | 7d                                     | ErC <sub>50</sub> frond count | >11                           | EC <sub>r50</sub> /10          | 1.1                   |                       |                         |     |

**Acute and chronic toxicity of IN-GN815 to aquatic organisms for calculation of tier 1 RAC**

| IN-GN815                  | Standard test species      | Duration                               | Endpoint                      | Value (mg a.s./L)             | Calculation of RAC (mg a.s./L) |                       | Acute RAC (µg a.s./L) | Chronic RAC (µg a.s./L) |     |
|---------------------------|----------------------------|----------------------------------------|-------------------------------|-------------------------------|--------------------------------|-----------------------|-----------------------|-------------------------|-----|
| Acute effect assessment   | <b>Fish</b>                |                                        |                               |                               |                                |                       | 230                   | 1190                    |     |
|                           | <i>Oncorhynchus mykiss</i> | 96h                                    | LC <sub>50</sub>              | 738*                          | LC <sub>50</sub> /100          | 7.38                  |                       |                         |     |
|                           | <b>Invertebrates</b>       |                                        |                               |                               |                                |                       |                       |                         |     |
|                           | <i>Daphnia magna</i>       | 48h                                    | EC <sub>50</sub>              | 23*                           | EC <sub>50</sub> /100          | 0.23                  |                       |                         |     |
| Chronic effect assessment | <b>Fish</b>                |                                        |                               |                               |                                |                       | 1190                  |                         |     |
|                           | <i>Oncorhynchus mykiss</i> | 28d                                    | NOEC larval growth            | 11.9*                         | NOEC/10                        | 1.19                  |                       |                         |     |
|                           | <b>Invertebrates</b>       |                                        |                               |                               |                                |                       |                       |                         |     |
|                           |                            | <i>Daphnia magna</i>                   | 21d                           | EC <sub>10</sub> reproduction | 52*                            | NOEC/10               |                       |                         | 5.2 |
|                           | <b>Algae</b>               |                                        |                               |                               |                                |                       |                       |                         |     |
|                           |                            | <i>Pseudokirchmeriella subcapitata</i> | 72h                           | ErC <sub>50</sub>             | >120                           | EC <sub>r50</sub> /10 |                       | 12                      |     |
|                           | <b>Macrophyta</b>          |                                        |                               |                               |                                |                       |                       |                         |     |
|                           | <i>Lemna gibba</i>         | 7d                                     | ErC <sub>50</sub> frond count | >120                          | EC <sub>r50</sub> /10          | 12                    |                       |                         |     |

\* No test available. Endpoint was derived by assuming the toxicity of the metabolite equal to the active substance

**Acute and chronic toxicity of M2 to aquatic organisms for calculation of tier 1 RAC**

| M2                        | Standard test species      | Duration                               | Endpoint                      | Value (mg a.s./L)             | Calculation of RAC (mg a.s./L) |                       | Acute RAC (µg a.s./L) | Chronic RAC (µg a.s./L) |     |
|---------------------------|----------------------------|----------------------------------------|-------------------------------|-------------------------------|--------------------------------|-----------------------|-----------------------|-------------------------|-----|
| Acute effect assessment   | <b>Fish</b>                |                                        |                               |                               |                                |                       | 230                   | 1190                    |     |
|                           | <i>Oncorhynchus mykiss</i> | 96h                                    | LC <sub>50</sub>              | 738*                          | LC <sub>50</sub> /100          | 7.38                  |                       |                         |     |
|                           | <b>Invertebrates</b>       |                                        |                               |                               |                                |                       |                       |                         |     |
|                           | <i>Daphnia magna</i>       | 48h                                    | EC <sub>50</sub>              | 23*                           | EC <sub>50</sub> /100          | 0.23                  |                       |                         |     |
| Chronic effect assessment | <b>Fish</b>                |                                        |                               |                               |                                |                       | 1190                  |                         |     |
|                           | <i>Oncorhynchus mykiss</i> | 28d                                    | NOEC larval growth            | 11.9*                         | NOEC/10                        | 1.19                  |                       |                         |     |
|                           | <b>Invertebrates</b>       |                                        |                               |                               |                                |                       |                       |                         |     |
|                           |                            | <i>Daphnia magna</i>                   | 21d                           | EC <sub>10</sub> reproduction | 52*                            | NOEC/10               |                       |                         | 5.2 |
|                           | <b>Algae</b>               |                                        |                               |                               |                                |                       |                       |                         |     |
|                           |                            | <i>Pseudokirchmeriella subcapitata</i> | 72h                           | ErC <sub>50</sub>             | >100                           | EC <sub>r50</sub> /10 |                       | 10                      |     |
|                           | <b>Macrophyta</b>          |                                        |                               |                               |                                |                       |                       |                         |     |
|                           | <i>Lemna gibba</i>         | 7d                                     | ErC <sub>50</sub> frond count | >100                          | EC <sub>r50</sub> /10          | 10                    |                       |                         |     |

\* No test available. Endpoint was derived by assuming the toxicity of the metabolite equal to the active substance

| FOCUSsw step 1-3 – PEC values for tribenuron-methyl and relevant metabolites – DuPont Sunflowers at 30g a.s./ha g a.s./ha x 1 |                                                     |                                                   |                                                      |                                                                       |                                                   |                                                                       |                                                   |                                                   |                                                   |
|-------------------------------------------------------------------------------------------------------------------------------|-----------------------------------------------------|---------------------------------------------------|------------------------------------------------------|-----------------------------------------------------------------------|---------------------------------------------------|-----------------------------------------------------------------------|---------------------------------------------------|---------------------------------------------------|---------------------------------------------------|
|                                                                                                                               | Active substance                                    | IN-L5296                                          | IN-A4098                                             | IN-00581                                                              | IN-R9805                                          | IN-D5119                                                              | IN-GN815                                          | IN-GK521                                          | M2                                                |
| <b>Tier 1 chronic RAC (µg/L)</b>                                                                                              | <b>0.47 µg/L</b>                                    | <b>1000 µg/L</b>                                  | <b>9.3 µg/L</b>                                      | <b>1000 µg/L</b>                                                      | <b>230 µg/L</b>                                   | <b>1000 µg/L</b>                                                      | <b>230 µg/L</b>                                   | <b>29 µg/L</b>                                    | <b>230 µg/L</b>                                   |
| Effect on most sensitive organism                                                                                             | <i>Lemna gibba</i> 7d ErC <sub>50</sub> 0.0047 mg/L | <i>Lemna gibba</i> 14d ErC <sub>50</sub> >10 mg/L | <i>Daphnia magna</i> 48h EC <sub>50</sub> >0.93 mg/L | <i>Pseudokirchneriella subcapitata</i> 72h ErC <sub>50</sub> >10 mg/L | <i>Daphnia magna</i> 48h EC <sub>50</sub> 23 mg/L | <i>Pseudokirchneriella subcapitata</i> 72h ErC <sub>50</sub> >10 mg/L | <i>Daphnia magna</i> 48h EC <sub>50</sub> 23 mg/L | <i>Lemna gibba</i> 7d ErC <sub>50</sub> 0.29 mg/L | <i>Daphnia magna</i> 48h EC <sub>50</sub> 23 mg/L |
| <b>Higher tier RAC (µg L)</b>                                                                                                 | n.a.                                                | n.a.                                              | n.a.                                                 | n.a.                                                                  | n.a.                                              | n.a.                                                                  | n.a.                                              | n.a.                                              | n.a.                                              |
| Scenario                                                                                                                      | PEC global max (µg L) pH >7/<br>pH <7               | PEC global max (µg L)                             | PEC global max (µg L)                                | PEC global max (µg L)                                                 | PEC global max (µg L)                             | PEC global max (µg L)                                                 | PEC global max (µg L)                             | PEC global max (µg L)                             | PEC global max (µg L)                             |
| FOCUS Step 1                                                                                                                  |                                                     |                                                   |                                                      |                                                                       |                                                   |                                                                       |                                                   |                                                   |                                                   |
|                                                                                                                               | 10.163 / 9.783                                      | 3.106                                             | 0.521                                                | 1.608                                                                 | 0.251                                             | 0.346                                                                 | 0.652                                             | 3.295                                             | 0.852                                             |
| FOCUS Step 2                                                                                                                  |                                                     |                                                   |                                                      |                                                                       |                                                   |                                                                       |                                                   |                                                   |                                                   |
| North Europe                                                                                                                  | 1.576 / 1.132                                       | 0.564                                             | 0.160                                                | 0.267                                                                 | 0.050                                             | 0.077                                                                 | 0.101                                             | 0.656                                             | 0.221                                             |
| South Europe                                                                                                                  | 2.916 / 2.033                                       | 1.040                                             | 0.227                                                | 0.485                                                                 | 0.086                                             | 0.116                                                                 | 0.169                                             | 1.050                                             | 0.315                                             |
| FOCUS Step 3                                                                                                                  |                                                     |                                                   |                                                      |                                                                       |                                                   |                                                                       |                                                   |                                                   |                                                   |
| D5 Pond                                                                                                                       | 0.015 / 0.006                                       | -                                                 | -                                                    | -                                                                     | -                                                 | -                                                                     | -                                                 | -                                                 | -                                                 |
| D5 Stream                                                                                                                     | 0.139 / 0.134                                       | -                                                 | -                                                    | -                                                                     | -                                                 | -                                                                     | -                                                 | -                                                 | -                                                 |
| R1 Pond                                                                                                                       | 0.010 / 0.014                                       | -                                                 | -                                                    | -                                                                     | -                                                 | -                                                                     | -                                                 | -                                                 | -                                                 |
| R1 Stream                                                                                                                     | 0.281 / 0.277                                       | -                                                 | -                                                    | -                                                                     | -                                                 | -                                                                     | -                                                 | -                                                 | -                                                 |
| R3 Stream                                                                                                                     | 0.153 / 0.153                                       | -                                                 | -                                                    | -                                                                     | -                                                 | -                                                                     | -                                                 | -                                                 | -                                                 |
| R4 Stream                                                                                                                     | 1.263 / 0.839                                       | -                                                 | -                                                    | -                                                                     | -                                                 | -                                                                     | -                                                 | -                                                 | -                                                 |

**FOCUSsw step 4 - PEC values for tribenuron-methyl – DuPont Sunflowers at 30g a.s./ha g a.s./ha x 1**

**Tier 1 RAC (µg L)** **0.47**

**Higher tier RAC (µg L)** n.a.

| Scenario                   | Mitigation options                                | PECsw (µg/L) |
|----------------------------|---------------------------------------------------|--------------|
| FOCUS Step 4 <sup>a)</sup> |                                                   |              |
| R4 Stream pH<7             | 10 m spray drift buffer + vegetative filter strip | 0.382        |
| R4 Stream pH>7             | 10 m spray drift buffer + vegetative filter strip | 0.574        |
| R4 Stream pH<7             | 20 m spray drift buffer + vegetative filter strip | 0.200        |
| R4 Stream pH>7             | 20 m spray drift buffer + vegetative filter strip | 0.301        |

All PECsw values presented in this table are based on input parameters agreed at the Pesticides Peer Review Meeting 157 (06-07 April 2017). Shaded cells indicate unacceptable risk (PEC>RAC)

| FOCUSsw step 1-3 – PEC values for tribenuron-methyl and relevant metabolites – DuPont Pasture at 7.5g a.s./ha g a.s./ha x 1 |                                                     |                                                   |                                                      |                                                                       |                                                   |                                                                       |                                                   |                                                   |                                                   |
|-----------------------------------------------------------------------------------------------------------------------------|-----------------------------------------------------|---------------------------------------------------|------------------------------------------------------|-----------------------------------------------------------------------|---------------------------------------------------|-----------------------------------------------------------------------|---------------------------------------------------|---------------------------------------------------|---------------------------------------------------|
|                                                                                                                             | Active substance                                    | IN-L5296                                          | IN-A4098                                             | IN-00581                                                              | IN-R9805                                          | IN-D5119                                                              | IN-GN815                                          | IN-GK521                                          | M2                                                |
| <b>Tier 1 chronic RAC (µg/L)</b>                                                                                            | <b>0.47 µg/L</b>                                    | <b>1000 µg/L</b>                                  | <b>9.3 µg/L</b>                                      | <b>1000 µg/L</b>                                                      | <b>230 µg/L</b>                                   | <b>1000 µg/L</b>                                                      | <b>230 µg/L</b>                                   | <b>29 µg/L</b>                                    | <b>230 µg/L</b>                                   |
| Effect on most sensitive organism                                                                                           | <i>Lemna gibba</i> 7d ErC <sub>50</sub> 0.0047 mg/L | <i>Lemna gibba</i> 14d ErC <sub>50</sub> >10 mg/L | <i>Daphnia magna</i> 48h EC <sub>50</sub> >0.93 mg/L | <i>Pseudokirchneriella subcapitata</i> 72h ErC <sub>50</sub> >10 mg/L | <i>Daphnia magna</i> 48h EC <sub>50</sub> 23 mg/L | <i>Pseudokirchneriella subcapitata</i> 72h ErC <sub>50</sub> >10 mg/L | <i>Daphnia magna</i> 48h EC <sub>50</sub> 23 mg/L | <i>Lemna gibba</i> 7d ErC <sub>50</sub> 0.29 mg/L | <i>Daphnia magna</i> 48h EC <sub>50</sub> 23 mg/L |
| <b>Higher tier RAC (µg L)</b>                                                                                               | n.a.                                                | n.a.                                              | n.a.                                                 | n.a.                                                                  | n.a.                                              | n.a.                                                                  | n.a.                                              | n.a.                                              | n.a.                                              |
| Scenario                                                                                                                    | PEC global max (µg L) pH >7/<br>pH <7               | PEC global max (µg L)                             | PEC global max (µg L)                                | PEC global max (µg L)                                                 | PEC global max (µg L)                             | PEC global max (µg L)                                                 | PEC global max (µg L)                             | PEC global max (µg L)                             | PEC global max (µg L)                             |
| FOCUS Step 1                                                                                                                |                                                     |                                                   |                                                      |                                                                       |                                                   |                                                                       |                                                   |                                                   |                                                   |
|                                                                                                                             | 2.541 / 2.446                                       | 0.777                                             | 0.13                                                 | 0.402                                                                 | 0.063                                             | 0.087                                                                 | 0.163                                             | 0.824                                             | 0.213                                             |
| FOCUS Step 2                                                                                                                |                                                     |                                                   |                                                      |                                                                       |                                                   |                                                                       |                                                   |                                                   |                                                   |
| North Europe                                                                                                                | 0.164 / 0.128                                       | 0.059                                             | 0.029                                                | 0.029                                                                 | 0.006                                             | 0.012                                                                 | 0.014                                             | 0.096                                             | 0.039                                             |
| South Europe                                                                                                                | 0.268 / 0.199                                       | 0.097                                             | 0.034                                                | 0.046                                                                 | 0.009                                             | 0.015                                                                 | 0.019                                             | 0.127                                             | 0.046                                             |

All PEC<sub>sw</sub> values presented in this table are based on input parameters agreed at the Pesticides Peer Review Meeting 157 (06-07 April 2017). Shaded cells indicate unacceptable risk (PEC>RAC)

| FOCUSsw step 1-3 – PEC values for tribenuron-methyl and relevant metabolites – DuPont Winter cereals at 24g a.s./ha g a.s./ha x 1 |                                                     |                                                   |                                                      |                                                                       |                                                   |                                                                       |                                                   |                                                   |                                                   |
|-----------------------------------------------------------------------------------------------------------------------------------|-----------------------------------------------------|---------------------------------------------------|------------------------------------------------------|-----------------------------------------------------------------------|---------------------------------------------------|-----------------------------------------------------------------------|---------------------------------------------------|---------------------------------------------------|---------------------------------------------------|
| Active substance                                                                                                                  | IN-L5296                                            | IN-A4098                                          | IN-00581                                             | IN-R9805                                                              | IN-D5119                                          | IN-GN815                                                              | IN-GK521                                          | M2                                                |                                                   |
| <b>Tier 1 chronic RAC (µg/L)</b>                                                                                                  | <b>0.47 µg/L</b>                                    | <b>1000 µg/L</b>                                  | <b>9.3 µg/L</b>                                      | <b>1000 µg/L</b>                                                      | <b>230 µg/L</b>                                   | <b>1000 µg/L</b>                                                      | <b>230 µg/L</b>                                   | <b>29 µg/L</b>                                    | <b>230 µg/L</b>                                   |
| Effect on most sensitive organism                                                                                                 | <i>Lemna gibba</i> 7d ErC <sub>50</sub> 0.0033 mg/L | <i>Lemna gibba</i> 14d ErC <sub>50</sub> >10 mg/L | <i>Daphnia magna</i> 48h EC <sub>50</sub> >0.93 mg/L | <i>Pseudokirchneriella subcapitata</i> 72h ErC <sub>50</sub> >10 mg/L | <i>Daphnia magna</i> 48h EC <sub>50</sub> 23 mg/L | <i>Pseudokirchneriella subcapitata</i> 72h ErC <sub>50</sub> >10 mg/L | <i>Daphnia magna</i> 48h EC <sub>50</sub> 23 mg/L | <i>Lemna gibba</i> 7d ErC <sub>50</sub> 0.29 mg/L | <i>Daphnia magna</i> 48h EC <sub>50</sub> 23 mg/L |
| <b>Higher tier RAC (µg L)</b>                                                                                                     | n.a.                                                | n.a.                                              | n.a.                                                 | n.a.                                                                  | n.a.                                              | n.a.                                                                  | n.a.                                              | n.a.                                              | n.a.                                              |
| Scenario                                                                                                                          | PEC global max (µg L) pH >7/ pH <7                  | PEC global max (µg L)                             | PEC global max (µg L)                                | PEC global max (µg L)                                                 | PEC global max (µg L)                             | PEC global max (µg L)                                                 | PEC global max (µg L)                             | PEC global max (µg L)                             | PEC global max (µg L)                             |
| FOCUS Step 1                                                                                                                      |                                                     |                                                   |                                                      |                                                                       |                                                   |                                                                       |                                                   |                                                   |                                                   |
|                                                                                                                                   | 8.13 / 7.826                                        | 2.485                                             | 0.417                                                | 1.287                                                                 | 0.201                                             | 0.277                                                                 | 0.522                                             | 2.636                                             | 0.682                                             |
| FOCUS Step 2                                                                                                                      |                                                     |                                                   |                                                      |                                                                       |                                                   |                                                                       |                                                   |                                                   |                                                   |
| North Europe                                                                                                                      | 0.859 / 0.635                                       | 0.309                                             | 0.108                                                | 0.148                                                                 | 0.029                                             | 0.049                                                                 | 0.060                                             | 0.406                                             | 0.148                                             |
| South Europe                                                                                                                      | 1.529 / 1.086                                       | 0.546                                             | 0.141                                                | 0.257                                                                 | 0.047                                             | 0.069                                                                 | 0.094                                             | 0.603                                             | 0.195                                             |
| FOCUS Step 3                                                                                                                      |                                                     |                                                   |                                                      |                                                                       |                                                   |                                                                       |                                                   |                                                   |                                                   |
| D1 Ditch                                                                                                                          | 0.222 / 0.170                                       | -                                                 | -                                                    | -                                                                     | -                                                 | -                                                                     | -                                                 | -                                                 | -                                                 |
| D1 Stream                                                                                                                         | 0.165 / 0.141                                       | -                                                 | -                                                    | -                                                                     | -                                                 | -                                                                     | -                                                 | -                                                 | -                                                 |
| D2 Ditch                                                                                                                          | 7.952 / 5.306                                       | -                                                 | -                                                    | -                                                                     | -                                                 | -                                                                     | -                                                 | -                                                 | -                                                 |
| D2 Stream                                                                                                                         | 5.469 / 3.374                                       | -                                                 | -                                                    | -                                                                     | -                                                 | -                                                                     | -                                                 | -                                                 | -                                                 |
| D3 Ditch                                                                                                                          | 0.173 / 0.152                                       | -                                                 | -                                                    | -                                                                     | -                                                 | -                                                                     | -                                                 | -                                                 | -                                                 |
| D4 Pond                                                                                                                           | 0.045 / 0.005                                       | -                                                 | -                                                    | -                                                                     | -                                                 | -                                                                     | -                                                 | -                                                 | -                                                 |
| D4 Stream                                                                                                                         | 0.143 / 0.127                                       | -                                                 | -                                                    | -                                                                     | -                                                 | -                                                                     | -                                                 | -                                                 | -                                                 |
| D5 Pond                                                                                                                           | 0.010 / 0.005                                       | -                                                 | -                                                    | -                                                                     | -                                                 | -                                                                     | -                                                 | -                                                 | -                                                 |
| D5 Stream                                                                                                                         | 0.124 / 0.121                                       | -                                                 | -                                                    | -                                                                     | -                                                 | -                                                                     | -                                                 | -                                                 | -                                                 |
| D6 Ditch                                                                                                                          | 0.154 / 0.153                                       | -                                                 | -                                                    | -                                                                     | -                                                 | -                                                                     | -                                                 | -                                                 | -                                                 |
| R1 Pond                                                                                                                           | 0.005 / 0.006                                       | -                                                 | -                                                    | -                                                                     | -                                                 | -                                                                     | -                                                 | -                                                 | -                                                 |
| R1 Stream                                                                                                                         | 0.222 / 0.161                                       | -                                                 | -                                                    | -                                                                     | -                                                 | -                                                                     | -                                                 | -                                                 | -                                                 |

|           |               |   |   |   |   |   |   |   |   |
|-----------|---------------|---|---|---|---|---|---|---|---|
| R3 Stream | 0.299 / 0.257 | - | - | - | - | - | - | - | - |
| R4 Stream | 0.708 / 0.592 | - | - | - | - | - | - | - | - |

All PEC<sub>sw</sub> values presented in this table are based on input parameters agreed at the Pesticides Peer Review Meeting 157 (06-07 April 2017). Shaded cells indicate unacceptable risk (PEC>RAC)

**FOCUS<sub>sw</sub> step 4 - PEC values for tribenuron-methyl – DuPont Winter cereals at 24 g a.s./ha g a.s./ha x 1**

**Tier 1 RAC (µg L)** **0.47**

**Higher tier RAC (µg L)** n.a.

| Scenario                   | Mitigation options                                | PEC <sub>sw</sub> (µg/L) |
|----------------------------|---------------------------------------------------|--------------------------|
| FOCUS Step 4 <sup>a)</sup> |                                                   |                          |
| R4 Stream pH<7             | 10 m spray drift buffer + vegetative filter strip | 0.268                    |
| R4 Stream pH>7             | 10 m spray drift buffer + vegetative filter strip | 0.320                    |

All PEC<sub>sw</sub> values presented in this table are based on input parameters agreed at the Pesticides Peer Review Meeting 157 (06-07 April 2017). Shaded cells indicate unacceptable risk (PEC>RAC)

| FOCUSsw step 1-3 – PEC values for tribenuron-methyl and relevant metabolites – DuPont Spring cereals at 22.5 g a.s./ha g a.s./ha x 1 |                                                     |                                                   |                                                      |                                                                       |                                                   |                                                                       |                                                   |                                                   |                                                   |
|--------------------------------------------------------------------------------------------------------------------------------------|-----------------------------------------------------|---------------------------------------------------|------------------------------------------------------|-----------------------------------------------------------------------|---------------------------------------------------|-----------------------------------------------------------------------|---------------------------------------------------|---------------------------------------------------|---------------------------------------------------|
| Active substance                                                                                                                     | IN-L5296                                            | IN-A4098                                          | IN-00581                                             | IN-R9805                                                              | IN-D5119                                          | IN-GN815                                                              | IN-GK521                                          | M2                                                |                                                   |
| <b>Tier 1 chronic RAC (µg/L)</b>                                                                                                     | <b>0.47 µg/L</b>                                    | <b>1000 µg/L</b>                                  | <b>9.3 µg/L</b>                                      | <b>1000 µg/L</b>                                                      | <b>230 µg/L</b>                                   | <b>1000 µg/L</b>                                                      | <b>230 µg/L</b>                                   | <b>29 µg/L</b>                                    | <b>230 µg/L</b>                                   |
| Effect on most sensitive organism                                                                                                    | <i>Lemna gibba</i> 7d ErC <sub>50</sub> 0.0047 mg/L | <i>Lemna gibba</i> 14d ErC <sub>50</sub> >10 mg/L | <i>Daphnia magna</i> 48h EC <sub>50</sub> >0.93 mg/L | <i>Pseudokirchneriella subcapitata</i> 72h ErC <sub>50</sub> >10 mg/L | <i>Daphnia magna</i> 48h EC <sub>50</sub> 23 mg/L | <i>Pseudokirchneriella subcapitata</i> 72h ErC <sub>50</sub> >10 mg/L | <i>Daphnia magna</i> 48h EC <sub>50</sub> 23 mg/L | <i>Lemna gibba</i> 7d ErC <sub>50</sub> 0.29 mg/L | <i>Daphnia magna</i> 48h EC <sub>50</sub> 23 mg/L |
| <b>Higher tier RAC (µg L)</b>                                                                                                        | n.a.                                                | n.a.                                              | n.a.                                                 | n.a.                                                                  | n.a.                                              | n.a.                                                                  | n.a.                                              | n.a.                                              | n.a.                                              |
| Scenario                                                                                                                             | PEC global max (µg L) pH >7/<br>pH <7               | PEC global max (µg L)                             | PEC global max (µg L)                                | PEC global max (µg L)                                                 | PEC global max (µg L)                             | PEC global max (µg L)                                                 | PEC global max (µg L)                             | PEC global max (µg L)                             | PEC global max (µg L)                             |
| FOCUS Step 1                                                                                                                         |                                                     |                                                   |                                                      |                                                                       |                                                   |                                                                       |                                                   |                                                   |                                                   |
|                                                                                                                                      | 7.622 / 7.337                                       | 2.33                                              | 0.391                                                | 1.206                                                                 | 0.188                                             | 0.26                                                                  | 0.489                                             | 2.471                                             | 0.639                                             |
| FOCUS Step 2                                                                                                                         |                                                     |                                                   |                                                      |                                                                       |                                                   |                                                                       |                                                   |                                                   |                                                   |
| North Europe                                                                                                                         | 0.805 / 0.595                                       | 0.289                                             | 0.102                                                | 0.139                                                                 | 0.027                                             | 0.046                                                                 | 0.057                                             | 0.381                                             | 0.139                                             |
| South Europe                                                                                                                         | 1.433 / 1.018                                       | 0.512                                             | 0.133                                                | 0.241                                                                 | 0.044                                             | 0.065                                                                 | 0.088                                             | 0.566                                             | 0.183                                             |
| FOCUS Step 3                                                                                                                         |                                                     |                                                   |                                                      |                                                                       |                                                   |                                                                       |                                                   |                                                   |                                                   |
| D1 Ditch                                                                                                                             | 0.179 / 0.152                                       | -                                                 | -                                                    | -                                                                     | -                                                 | -                                                                     | -                                                 | -                                                 | -                                                 |
| D1 Stream                                                                                                                            | 0.126 / 0.126                                       | -                                                 | -                                                    | -                                                                     | -                                                 | -                                                                     | -                                                 | -                                                 | -                                                 |
| D3 Ditch                                                                                                                             | 0.179 / 0.143                                       | -                                                 | -                                                    | -                                                                     | -                                                 | -                                                                     | -                                                 | -                                                 | -                                                 |
| D4 Pond                                                                                                                              | 0.057 / 0.005                                       | -                                                 | -                                                    | -                                                                     | -                                                 | -                                                                     | -                                                 | -                                                 | -                                                 |
| D4 Stream                                                                                                                            | 0.125 / 0.123                                       | -                                                 | -                                                    | -                                                                     | -                                                 | -                                                                     | -                                                 | -                                                 | -                                                 |
| D5 Pond                                                                                                                              | 0.008 / 0.005                                       | -                                                 | -                                                    | -                                                                     | -                                                 | -                                                                     | -                                                 | -                                                 | -                                                 |
| D5 Stream                                                                                                                            | 0.126 / 0.125                                       | -                                                 | -                                                    | -                                                                     | -                                                 | -                                                                     | -                                                 | -                                                 | -                                                 |
| R4 Stream                                                                                                                            | 0.715 / 0.574                                       | -                                                 | -                                                    | -                                                                     | -                                                 | -                                                                     | -                                                 | -                                                 | -                                                 |

All PEC<sub>sw</sub> values presented in this table are based on input parameters agreed at the Pesticides Peer Review Meeting 157 (06-07 April 2017). Shaded cells indicate unacceptable risk (PEC>RAC)



**FOCUSsw step 4 - PEC values for tribenuron-methyl – DuPont Spring cereals at 22.5 g a.s./ha g a.s./ha x 1**

**Tier 1 RAC (µg L)** **0.47**

**Higher tier RAC (µg L)** n.a.

| Scenario                   | Mitigation options                                | PECsw (µg/L) |
|----------------------------|---------------------------------------------------|--------------|
| FOCUS Step 4 <sup>a)</sup> |                                                   |              |
| R4 Stream pH<7             | 10 m spray drift buffer + vegetative filter strip | 0.260        |
| R4 Stream pH>7             | 10 m spray drift buffer + vegetative filter strip | 0.324        |

All PECsw values presented in this table are based on input parameters agreed at the Pesticides Peer Review Meeting 157 (06-07 April 2017). Shaded cells indicate unacceptable risk (PEC>RAC)

| FOCUSsw step 1-3 – PEC values for tribenuron-methyl and relevant metabolites – DuPont Olives at 20 g a.s./ha g a.s./ha x 1 |                                                     |                                                   |                                                      |                                                                       |                                                   |                                                                       |                                                   |                                                   |                                                   |
|----------------------------------------------------------------------------------------------------------------------------|-----------------------------------------------------|---------------------------------------------------|------------------------------------------------------|-----------------------------------------------------------------------|---------------------------------------------------|-----------------------------------------------------------------------|---------------------------------------------------|---------------------------------------------------|---------------------------------------------------|
|                                                                                                                            | Active substance                                    | IN-L5296                                          | IN-A4098                                             | IN-00581                                                              | IN-R9805                                          | IN-D5119                                                              | IN-GN815                                          | IN-GK521                                          | M2                                                |
| <b>Tier 1 chronic RAC (µg/L)</b>                                                                                           | <b>0.47 µg/L</b>                                    | <b>1000 µg/L</b>                                  | <b>9.3 µg/L</b>                                      | <b>1000 µg/L</b>                                                      | <b>230 µg/L</b>                                   | <b>1000 µg/L</b>                                                      | <b>230 µg/L</b>                                   | <b>29 µg/L</b>                                    | <b>230 µg/L</b>                                   |
| Effect on most sensitive organism                                                                                          | <i>Lemna gibba</i> 7d ErC <sub>50</sub> 0.0047 mg/L | <i>Lemna gibba</i> 14d ErC <sub>50</sub> >10 mg/L | <i>Daphnia magna</i> 48h EC <sub>50</sub> >0.93 mg/L | <i>Pseudokirchneriella subcapitata</i> 72h ErC <sub>50</sub> >10 mg/L | <i>Daphnia magna</i> 48h EC <sub>50</sub> 23 mg/L | <i>Pseudokirchneriella subcapitata</i> 72h ErC <sub>50</sub> >10 mg/L | <i>Daphnia magna</i> 48h EC <sub>50</sub> 23 mg/L | <i>Lemna gibba</i> 7d ErC <sub>50</sub> 0.29 mg/L | <i>Daphnia magna</i> 48h EC <sub>50</sub> 23 mg/L |
| <b>Higher tier RAC (µg L)</b>                                                                                              | n.a.                                                | n.a.                                              | n.a.                                                 | n.a.                                                                  | n.a.                                              | n.a.                                                                  | n.a.                                              | n.a.                                              | n.a.                                              |
| Scenario                                                                                                                   | PEC global max (µg L) pH >7/ pH <7                  | PEC global max (µg L)                             | PEC global max (µg L)                                | PEC global max (µg L)                                                 | PEC global max (µg L)                             | PEC global max (µg L)                                                 | PEC global max (µg L)                             | PEC global max (µg L)                             | PEC global max (µg L)                             |
| FOCUS Step 1                                                                                                               |                                                     |                                                   |                                                      |                                                                       |                                                   |                                                                       |                                                   |                                                   |                                                   |
|                                                                                                                            | 7.639 / 7.386                                       | 2.371                                             | 0.653                                                | 1.226                                                                 | 0.212                                             | 0.347                                                                 | 0.539                                             | 3.03                                              | 0.999                                             |
| FOCUS Step 2                                                                                                               |                                                     |                                                   |                                                      |                                                                       |                                                   |                                                                       |                                                   |                                                   |                                                   |
| North Europe                                                                                                               | 2.013 / 1.627                                       | 0.734                                             | 0.412                                                | 0.367                                                                 | 0.080                                             | 0.174                                                                 | 0.181                                             | 1.322                                             | 0.558                                             |
| South Europe                                                                                                               | 3.130 / 2.378                                       | 1.130                                             | 0.468                                                | 0.548                                                                 | 0.111                                             | 0.206                                                                 | 0.238                                             | 1.650                                             | 0.637                                             |
| FOCUS Step 3                                                                                                               |                                                     |                                                   |                                                      |                                                                       |                                                   |                                                                       |                                                   |                                                   |                                                   |
| granular application                                                                                                       |                                                     |                                                   |                                                      |                                                                       |                                                   |                                                                       |                                                   |                                                   |                                                   |
| D6 Ditch                                                                                                                   | 0.006 / 0.002                                       |                                                   |                                                      |                                                                       |                                                   |                                                                       |                                                   |                                                   |                                                   |
| R4 Stream                                                                                                                  | <0.001 / <0.001                                     |                                                   |                                                      |                                                                       |                                                   |                                                                       |                                                   |                                                   |                                                   |
| granular application + arable crop drift from ground spray application                                                     |                                                     |                                                   |                                                      |                                                                       |                                                   |                                                                       |                                                   |                                                   |                                                   |
| D6 Ditch                                                                                                                   | 0.132 / 0.128                                       |                                                   |                                                      |                                                                       |                                                   |                                                                       |                                                   |                                                   |                                                   |
| R4 Stream                                                                                                                  | 0.070 / 0.070                                       |                                                   |                                                      |                                                                       |                                                   |                                                                       |                                                   |                                                   |                                                   |

All PEC<sub>sw</sub> values presented in this table are based on input parameters agreed at the Pesticides Peer Review Meeting 157 (06-07 April 2017).

**FOCUSsw step 1-3 – PEC values for tribenuron-methyl and relevant metabolites – Task Force Winter cereals (autumn application) at 15 g a.s./ha g a.s./ha x 1**

|                                   | Active substance                                   | IN-L5296                                          | IN-A4098                                             | IN-00581                                                              | IN-R9805                                          | IN-D5119                                                              | IN-GN815                                          | IN-GK521                                          | M2                                                |
|-----------------------------------|----------------------------------------------------|---------------------------------------------------|------------------------------------------------------|-----------------------------------------------------------------------|---------------------------------------------------|-----------------------------------------------------------------------|---------------------------------------------------|---------------------------------------------------|---------------------------------------------------|
| <b>Tier 1 chronic RAC (µg/L)</b>  | <b>0. 47 µg/L</b>                                  | <b>1000 µg/L</b>                                  | <b>9.3 µg/L</b>                                      | <b>1000 µg/L</b>                                                      | <b>230 µg/L</b>                                   | <b>1000 µg/L</b>                                                      | <b>230 µg/L</b>                                   | <b>29 µg/L</b>                                    | <b>230 µg/L</b>                                   |
| Effect on most sensitive organism | <i>Lemna gibba</i> 7d ErC <sub>50</sub> 0.0047mg/L | <i>Lemna gibba</i> 14d ErC <sub>50</sub> >10 mg/L | <i>Daphnia magna</i> 48h EC <sub>50</sub> >0.93 mg/L | <i>Pseudokirchneriella subcapitata</i> 72h ErC <sub>50</sub> >10 mg/L | <i>Daphnia magna</i> 48h EC <sub>50</sub> 23 mg/L | <i>Pseudokirchneriella subcapitata</i> 72h ErC <sub>50</sub> >10 mg/L | <i>Daphnia magna</i> 48h EC <sub>50</sub> 23 mg/L | <i>Lemna gibba</i> 7d ErC <sub>50</sub> 0.29 mg/L | <i>Daphnia magna</i> 48h EC <sub>50</sub> 23 mg/L |
| <b>Higher tier RAC (µg L)</b>     | n.a.                                               | n.a.                                              | n.a.                                                 | n.a.                                                                  | n.a.                                              | n.a.                                                                  | n.a.                                              | n.a.                                              | n.a.                                              |
| Scenario                          | PEC global max (µg L)                              | PEC global max (µg L)                             | PEC global max (µg L)                                | PEC global max (µg L)                                                 | PEC global max (µg L)                             | PEC global max (µg L)                                                 | PEC global max (µg L)                             | PEC global max (µg L)                             | PEC global max (µg L)                             |
|                                   | 5.08                                               | 3.11                                              | 0.21                                                 | 1.69                                                                  | 0.35                                              | 0.84                                                                  | 0.92                                              | 1.51                                              | 0.35                                              |
| North Europe (Oct-Feb)            | 2.21                                               | 1.45                                              | 0.10                                                 | 0.74                                                                  | 0.16                                              | 0.37                                                                  | 0.38                                              | 0.62                                              | 0.15                                              |
| South Europe (Oct-Feb)            | 1.79                                               | 1.17                                              | 0.08                                                 | 0.59                                                                  | 0.13                                              | 0.30                                                                  | 0.30                                              | 0.20                                              | 0.12                                              |
| D1 ditch                          | 1.749                                              |                                                   |                                                      |                                                                       |                                                   |                                                                       |                                                   |                                                   |                                                   |
| D1 stream                         | 1.125                                              |                                                   |                                                      |                                                                       |                                                   |                                                                       |                                                   |                                                   |                                                   |
| D2 ditch                          | 1.722                                              |                                                   |                                                      |                                                                       |                                                   |                                                                       |                                                   |                                                   |                                                   |
| D2 stream                         | 1.316                                              |                                                   |                                                      |                                                                       |                                                   |                                                                       |                                                   |                                                   |                                                   |
| D3 ditch                          | 0.387                                              |                                                   |                                                      |                                                                       |                                                   |                                                                       |                                                   |                                                   |                                                   |
| D4 pond                           | 0.490                                              |                                                   |                                                      |                                                                       |                                                   |                                                                       |                                                   |                                                   |                                                   |
| D4 stream                         | 0.470                                              |                                                   |                                                      |                                                                       |                                                   |                                                                       |                                                   |                                                   |                                                   |
| D5 pond                           | 0.394                                              |                                                   |                                                      |                                                                       |                                                   |                                                                       |                                                   |                                                   |                                                   |
| D5 stream                         | 0.267                                              |                                                   |                                                      |                                                                       |                                                   |                                                                       |                                                   |                                                   |                                                   |
| D6 ditch                          | 0.446                                              |                                                   |                                                      |                                                                       |                                                   |                                                                       |                                                   |                                                   |                                                   |
| R1 pond                           | 0.003                                              |                                                   |                                                      |                                                                       |                                                   |                                                                       |                                                   |                                                   |                                                   |
| R1 stream                         | 0.086                                              |                                                   |                                                      |                                                                       |                                                   |                                                                       |                                                   |                                                   |                                                   |

|           |       |
|-----------|-------|
| R3 stream | 1.123 |
| R4 stream | 0.195 |

All PEC<sub>sw</sub> values presented in this table are based on input parameters agreed at the Pesticides Peer Review Meeting 157 (06-07 April 2017). Shaded cells indicate unacceptable risk (PEC>RAC)

**FOCUS<sub>sw</sub> step 4 - PEC values for tribenuron-methyl – Task Force Winter cereals (autumn application) at 15 g a.s./ha g a.s./ha x 1**

**Tier 1 RAC (µg L)** 0.47

**Higher tier RAC (µg L)** n.a.

| Scenario                                                                      | Mitigation options                                | PEC <sub>sw</sub> (µg/L) |
|-------------------------------------------------------------------------------|---------------------------------------------------|--------------------------|
| FOCUS Step 4 with autumn application (alkaline soil DT50 = 16.7 d, Koc = 8.6) |                                                   |                          |
| D1 ditch                                                                      | 20 m spray drift buffer + vegetative filter strip | 1.748                    |
| D1 stream                                                                     | 20 m spray drift buffer + vegetative filter strip | 1.125                    |
| D2 ditch                                                                      | 20 m spray drift buffer + vegetative filter strip | 1.722                    |
| D2 stream                                                                     | 20 m spray drift buffer + vegetative filter strip | 1.316                    |
| D3 ditch                                                                      | 20 m spray drift buffer + vegetative filter strip | 0.300 --                 |
| D4 pond                                                                       | 20 m spray drift buffer + vegetative filter strip | 0.489                    |
| D4 stream                                                                     | 20 m spray drift buffer + vegetative filter strip | 0.470                    |
| D5 pond                                                                       | 20 m spray drift buffer + vegetative filter strip | 0.394                    |
| D6 ditch                                                                      | 20 m spray drift buffer + vegetative filter strip | 0.446                    |
| R3 stream                                                                     | 20 m spray drift buffer + vegetative filter strip | 0.264                    |

All PEC<sub>sw</sub> values presented in this table are based on input parameters agreed at the Pesticides Peer Review Meeting 157 (06-07 April)  
Shaded cells indicate unacceptable risk (PEC>RAC)

**FOCUS<sub>sw</sub> step 1-3 – PEC values for tribenuron-methyl and relevant metabolites – Task Force Winter cereals (spring application) at 30 g a.s./ha g a.s./ha x 1**

| Active substance          | IN-L5296  | IN-A4098  | IN-00581 | IN-R9805  | IN-D5119 | IN-GN815  | IN-GK521 | M2      |          |
|---------------------------|-----------|-----------|----------|-----------|----------|-----------|----------|---------|----------|
| <b>Tier 1 chronic RAC</b> | 0.47 µg/L | 1000 µg/L | 9.3 µg/L | 1000 µg/L | 230 µg/L | 1000 µg/L | 230 µg/L | 29 µg/L | 230 µg/L |

| <b>(µg/L)</b>                     |                                                    |                                                   |                                                      |                                                                       |                                                   |                                                                       |                                                   |                                                   |                                                   |
|-----------------------------------|----------------------------------------------------|---------------------------------------------------|------------------------------------------------------|-----------------------------------------------------------------------|---------------------------------------------------|-----------------------------------------------------------------------|---------------------------------------------------|---------------------------------------------------|---------------------------------------------------|
| Effect on most sensitive organism | <i>Lemna gibba</i> 7d ErC <sub>50</sub> 0.0047mg/L | <i>Lemna gibba</i> 14d ErC <sub>50</sub> >10 mg/L | <i>Daphnia magna</i> 48h EC <sub>50</sub> >0.93 mg/L | <i>Pseudokirchneriella subcapitata</i> 72h ErC <sub>50</sub> >10 mg/L | <i>Daphnia magna</i> 48h EC <sub>50</sub> 23 mg/L | <i>Pseudokirchneriella subcapitata</i> 72h ErC <sub>50</sub> >10 mg/L | <i>Daphnia magna</i> 48h EC <sub>50</sub> 23 mg/L | <i>Lemna gibba</i> 7d ErC <sub>50</sub> 0.29 mg/L | <i>Daphnia magna</i> 48h EC <sub>50</sub> 23 mg/L |
| <b>Higher tier RAC (µg L)</b>     | n.a.                                               | n.a.                                              | n.a.                                                 | n.a.                                                                  | n.a.                                              | n.a.                                                                  | n.a.                                              | n.a.                                              | n.a.                                              |
| <b>Scenario</b>                   | <b>PEC global max (µg L)</b>                       | <b>PEC global max (µg L)</b>                      | <b>PEC global max (µg L)</b>                         | <b>PEC global max (µg L)</b>                                          | <b>PEC global max (µg L)</b>                      | <b>PEC global max (µg L)</b>                                          | <b>PEC global max (µg L)</b>                      | <b>PEC global max (µg L)</b>                      | <b>PEC global max (µg L)</b>                      |
|                                   | 10.16                                              | 6.23                                              | 0.42                                                 | 3.37                                                                  | 0.71                                              | 1.69                                                                  | 1.83                                              | 3.03                                              | 0.71                                              |
| North Europe (Mar-May)            | 1.91                                               | 1.21                                              | 0.08                                                 | 0.62                                                                  | 0.14                                              | 0.32                                                                  | 0.32                                              | 0.49                                              | 0.12                                              |
| South Europe Mar-May              | 3.59                                               | 2.33                                              | 0.17                                                 | 1.19                                                                  | 0.26                                              | 0.060                                                                 | 0.61                                              | 0.98                                              | 0.24                                              |
| D1 ditch                          | 4.431                                              |                                                   |                                                      |                                                                       |                                                   |                                                                       |                                                   |                                                   |                                                   |
| D1 stream                         | 2.790                                              |                                                   |                                                      |                                                                       |                                                   |                                                                       |                                                   |                                                   |                                                   |
| D2 ditch                          | 3.819                                              |                                                   |                                                      |                                                                       |                                                   |                                                                       |                                                   |                                                   |                                                   |
| D2 stream                         | 2.413                                              |                                                   |                                                      |                                                                       |                                                   |                                                                       |                                                   |                                                   |                                                   |
| D3 ditch                          | 0.216                                              |                                                   |                                                      |                                                                       |                                                   |                                                                       |                                                   |                                                   |                                                   |
| D4 pond                           | 0.047                                              |                                                   |                                                      |                                                                       |                                                   |                                                                       |                                                   |                                                   |                                                   |
| D4 stream                         | 0.171                                              |                                                   |                                                      |                                                                       |                                                   |                                                                       |                                                   |                                                   |                                                   |
| D5 pond                           | 0.013                                              |                                                   |                                                      |                                                                       |                                                   |                                                                       |                                                   |                                                   |                                                   |
| D5 stream                         | 0.154                                              |                                                   |                                                      |                                                                       |                                                   |                                                                       |                                                   |                                                   |                                                   |
| D6 ditch                          | 0.209                                              |                                                   |                                                      |                                                                       |                                                   |                                                                       |                                                   |                                                   |                                                   |
| R1 pond                           | 0.016                                              |                                                   |                                                      |                                                                       |                                                   |                                                                       |                                                   |                                                   |                                                   |
| R1 stream                         | 0.500                                              |                                                   |                                                      |                                                                       |                                                   |                                                                       |                                                   |                                                   |                                                   |
| R3 stream                         | 1.218                                              |                                                   |                                                      |                                                                       |                                                   |                                                                       |                                                   |                                                   |                                                   |
| R4 stream                         | 0.125                                              |                                                   |                                                      |                                                                       |                                                   |                                                                       |                                                   |                                                   |                                                   |
| D1 ditch                          | 0.314                                              |                                                   |                                                      |                                                                       |                                                   |                                                                       |                                                   |                                                   |                                                   |
| D1 stream                         | 0.223                                              |                                                   |                                                      |                                                                       |                                                   |                                                                       |                                                   |                                                   |                                                   |

|           |       |
|-----------|-------|
| D2 ditch  | 4.103 |
| D2 stream | 2.820 |
| D3 ditch  | 0.217 |
| D4 pond   | 0.051 |
| D4 stream | 0.174 |
| D5 pond   | 0.012 |
| D5 stream | 0.155 |
| D6 ditch  | 0.193 |
| R1 pond   | 0.007 |
| R1 stream | 0.277 |
| R3 stream | 0.371 |
| R4 stream | 0.567 |
| <hr/>     |       |
| D1 ditch  | 0.213 |
| D1 stream | 0.177 |
| D2 ditch  | 3.693 |
| D2 stream | 2.343 |
| D3 ditch  | 0.190 |
| D4 pond   | 0.007 |
| D4 stream | 0.159 |
| D5 pond   | 0.007 |
| D5 stream | 0.152 |
| D6 ditch  | 0.191 |
| R1 pond   | 0.008 |
| R1 stream | 0.229 |
| R3 stream | 0.405 |
| R4 stream | 0.583 |

**FOCUSsw step 4 - PEC values for tribenuron-methyl – Task Force Winter cereals (spring application) at 30 g a.s./ha g a.s./ha x 1**

**Tier 1 RAC (µg L)** **0.47**

**Higher tier RAC (µg L)** n.a.

| Scenario                                                                     | Mitigation options                                | PECsw (µg/L) |
|------------------------------------------------------------------------------|---------------------------------------------------|--------------|
| FOCUS Step 4 with early application (alkaline soil DT50 = 16.7 d, Koc = 8.6) |                                                   |              |
| D1 ditch                                                                     | 20 m spray drift buffer + vegetative filter strip | 4.431        |
| D1 stream                                                                    | 20 m spray drift buffer + vegetative filter strip | 2.790        |
| D2 ditch                                                                     | 20 m spray drift buffer + vegetative filter strip | 3.819        |
| D2 stream                                                                    | 20 m spray drift buffer + vegetative filter strip | 2.413        |
| R1 stream                                                                    | 20 m spray drift buffer + vegetative filter strip | 0.118        |
| R3 stream                                                                    | 20 m spray drift buffer + vegetative filter strip | 0.289        |
| FOCUS Step 4 with late application (alkaline soil DT50 = 16.7 d, Koc = 8.6)  |                                                   |              |
| D1 ditch                                                                     | 10 m spray drift buffer + vegetative filter strip | 0.314        |
| D2 ditch                                                                     | 10 m spray drift buffer + vegetative filter strip | 4.103        |
| D2 stream                                                                    | 10 m spray drift buffer + vegetative filter strip | 2.820        |
| R1 stream                                                                    | 10 m spray drift buffer + vegetative filter strip | 0.169        |
| R3 stream                                                                    | 10 m spray drift buffer + vegetative filter strip | 0.256        |
| FOCUS Step 4 with late application (acidic soil DT50 = 5.3 d, Koc = 38.9)    |                                                   |              |
| D2 ditch                                                                     | 10 m spray drift buffer + vegetative filter strip | 3.693        |
| D2 stream                                                                    | 10 m spray drift buffer + vegetative filter strip | 2.343        |
| R3 stream                                                                    | 10 m spray drift buffer + vegetative filter strip | 0.149        |
| R4 stream                                                                    | 10 m spray drift buffer + vegetative filter strip | 0.325        |

All PECsw values presented in this table are based on input parameters agreed at the Pesticides Peer Review Meeting 157 (06-07 April)  
 Shaded cells indicate unacceptable risk (PEC>RAC)

| FOCUSsw step 1-3 – PEC values for tribenuron-methyl and relevant metabolites – Task Force Spring cereals at 30 g a.s./ha g a.s./ha x 1 |                                                       |                                                   |                                                      |                                                                       |                                                   |                                                                       |                                                   |                                                   |                                                   |
|----------------------------------------------------------------------------------------------------------------------------------------|-------------------------------------------------------|---------------------------------------------------|------------------------------------------------------|-----------------------------------------------------------------------|---------------------------------------------------|-----------------------------------------------------------------------|---------------------------------------------------|---------------------------------------------------|---------------------------------------------------|
|                                                                                                                                        | Active substance                                      | IN-L5296                                          | IN-A4098                                             | IN-00581                                                              | IN-R9805                                          | IN-D5119                                                              | IN-GN815                                          | IN-GK521                                          | M2                                                |
| <b>Tier 1 chronic RAC (µg/L)</b>                                                                                                       | <b>0.47 µg/L</b>                                      | <b>1000 µg/L</b>                                  | <b>9.3 µg/L</b>                                      | <b>1000 µg/L</b>                                                      | <b>230 µg/L</b>                                   | <b>1000 µg/L</b>                                                      | <b>230 µg/L</b>                                   | <b>29 µg/L</b>                                    | <b>230 µg/L</b>                                   |
| Effect on most sensitive organism                                                                                                      | <i>Lemna gibba</i> 7d ErC <sub>50</sub> 0.002947 mg/L | <i>Lemna gibba</i> 14d ErC <sub>50</sub> >10 mg/L | <i>Daphnia magna</i> 48h EC <sub>50</sub> >0.93 mg/L | <i>Pseudokirchneriella subcapitata</i> 72h ErC <sub>50</sub> >10 mg/L | <i>Daphnia magna</i> 48h EC <sub>50</sub> 23 mg/L | <i>Pseudokirchneriella subcapitata</i> 72h ErC <sub>50</sub> >10 mg/L | <i>Daphnia magna</i> 48h EC <sub>50</sub> 23 mg/L | <i>Lemna gibba</i> 7d ErC <sub>50</sub> 0.29 mg/L | <i>Daphnia magna</i> 48h EC <sub>50</sub> 23 mg/L |
| <b>Higher tier RAC (µg L)</b>                                                                                                          | n.a.                                                  | n.a.                                              | n.a.                                                 | n.a.                                                                  | n.a.                                              | n.a.                                                                  | n.a.                                              | n.a.                                              | n.a.                                              |
| Scenario                                                                                                                               | PEC global max (µg L)                                 | PEC global max (µg L)                             | PEC global max (µg L)                                | PEC global max (µg L)                                                 | PEC global max (µg L)                             | PEC global max (µg L)                                                 | PEC global max (µg L)                             | PEC global max (µg L)                             | PEC global max (µg L)                             |
|                                                                                                                                        | 10.16                                                 | 6.23                                              | 0.42                                                 | 3.37                                                                  | 0.71                                              | 1.69                                                                  | 1.83                                              | 3.03                                              | 0.71                                              |
| North Europe (Mar-May)                                                                                                                 | 1.91                                                  | 1.21                                              | 0.08                                                 | 0.62                                                                  | 0.14                                              | 0.32                                                                  | 0.32                                              | 0.49                                              | 0.12                                              |
| South Europe Mar-May                                                                                                                   | 3.59                                                  | 2.33                                              | 0.17                                                 | 1.19                                                                  | 0.26                                              | 0.060                                                                 | 0.61                                              | 0.98                                              | 0.24                                              |



|           |       |
|-----------|-------|
| D1 ditch  | 0.251 |
| D1 stream | 0.169 |
| D3 ditch  | 0.228 |
| D4 pond   | 0.054 |
| D4 stream | 0.175 |
| D5 pond   | 0.028 |
| D5 stream | 0.178 |
| R4 stream | 0.126 |
| D1 ditch  | 0.239 |
| D1 stream | 0.168 |
| D3 ditch  | 0.240 |
| D4 pond   | 0.076 |
| D4 stream | 0.167 |
| D5 pond   | 0.010 |
| D5 stream | 0.168 |
| R4 stream | 0.936 |
| D1 ditch  | 0.202 |
| D1 stream | 0.168 |
| D3 ditch  | 0.190 |
| D4 pond   | 0.007 |
| D4 stream | 0.164 |
| D5 pond   | 0.007 |
| D5 stream | 0.166 |
| R4 stream | 0.850 |

**FOCUSsw step 4 - PEC values for tribenuron-methyl – Task Force Spring cereals at 30 g a.s./ha g a.s./ha x 1**

**Tier 1 RAC (µg L)** **0.47**

**Higher tier RAC (µg L)** n.a.

| Scenario                                                                    | Mitigation options                                | PECsw (µg/L) |
|-----------------------------------------------------------------------------|---------------------------------------------------|--------------|
| FOCUS Step 4 with late application (alkaline soil DT50 = 16.7 d, Koc = 8.6) |                                                   |              |
| R4 stream                                                                   | 20 m spray drift buffer + vegetative filter strip | 0.221        |
| FOCUS Step 4 with late application (acidic soil DT50 = 5.3 d, Koc = 38.9)   |                                                   |              |
| R4 stream                                                                   | 20 m spray drift buffer + vegetative filter strip | 0.200        |

All PECsw values presented in this table are based on input parameters agreed at the Pesticides Peer Review Meeting 157 (06-07 April)

Shaded cells indicate unacceptable risk (PEC>RAC)

**Effects on bees (Regulation (EU) N° 283/2013, Annex Part A, point 8.3.1 and Regulation (EU) N° 284/2013 Annex Part A, point 10.3.1) \***

\* This section does reflect the new EFSA Guidance Document on bees which has not yet been noted by the Standing Committee on Plants, Animals, Food and Feed.

| Species                                             | Test substance                                   | Time scale/type of endpoint | End point                                                                                                                     | toxicity                                                                                                     |
|-----------------------------------------------------|--------------------------------------------------|-----------------------------|-------------------------------------------------------------------------------------------------------------------------------|--------------------------------------------------------------------------------------------------------------|
| <i>Apis mellifera L.</i> (adult honey bee)          | Tribenuron-methyl technical                      | 48 h<br>Acute               | Oral LD <sub>50</sub><br>Contact LD <sub>50</sub>                                                                             | > 9.1 µg a.s./bee<br>> 98.4 µg a.s./bee                                                                      |
| <i>Apis mellifera L.</i> (adult honey bee)          | Tribenuron methyl 75WG                           | 48 h<br>Acute               | Oral LD <sub>50</sub><br>Contact LD <sub>50</sub>                                                                             | > 186 µg a.s./bee<br>> 100 µg a.s./bee                                                                       |
| <i>Apis mellifera L.</i> (adult honey bee)          | Tribenuron methyl 50SG                           | 48 h<br>Acute               | Oral LD <sub>50</sub><br>Contact LD <sub>50</sub>                                                                             | > 77.1 µg a.s./bee<br>> 100 µg a.s./bee                                                                      |
| <i>Apis mellifera L.</i> (adult honey bee)          | Tribenuron methyl 50SG<br>+ DPX-KG691 surfactant | 48 h<br>Acute               | Oral LD <sub>50</sub><br>Contact LD <sub>50</sub>                                                                             | 33.7 µg a.s./bee<br>> 200 µg a.s./bee                                                                        |
| <i>Apis mellifera L.</i> (adult honey bee)          | Tribenuron-Methyl 750 g/kg WG                    | 48 h<br>Acute               | Oral LD <sub>50</sub><br>Contact LD <sub>50</sub>                                                                             | > 108.8 µg a.s./bee<br>> 100 µg a.s./bee                                                                     |
| <i>Apis mellifera carnica L.</i> (adult honey bee)  | Tribenuron-methyl technical                      | 10 days<br>Chronic          | Oral LD <sub>50</sub><br>[Oral NOEL <sub>mortality</sub> ]                                                                    | > 74.3 µg a.s./bee/day<br>[74.3 µg a.s./bee/day]                                                             |
| <i>Apis mellifera L.</i> (adult honey bee)          | Tribenuron-methyl 75 WG                          | 10 days<br>Chronic          | Oral LD <sub>50</sub><br>Oral NOEL <sub>hpg</sub><br>[Oral NOEL <sub>mortality</sub> ]                                        | > 147.5 µg a.s./bee/day<br>147.5 µg a.s./bee/day<br>[124.7 µg a.s./bee/day]                                  |
| <i>Apis mellifera carnica L.</i> (honey bee larvae) | Tribenuron-methyl technical                      | 72 h<br>Single dose         | Oral NOEL <sub>larvae</sub><br>[Oral LD <sub>50</sub> larvae]                                                                 | 40.6 µg a.s./larva<br>[> 40.6 µg a.s./larva]                                                                 |
| <i>Apis mellifera carnica L.</i> (honey bee larvae) | Tribenuron methyl 50SG                           | 72 h<br>Single dose         | Oral NOEL <sub>larvae</sub><br>[Oral LD <sub>50</sub> larvae]                                                                 | 33.3 µg a.s./larva<br>[> 100 µg a.s./larva]                                                                  |
| <i>Apis mellifera carnica L.</i> (honey bee larvae) | Tribenuron-methyl 75 WG                          | 120 h<br>Repeated dose      | Oral NOEL <sub>larvae</sub><br>[Oral LD <sub>10</sub> larvae<br>Oral LD <sub>20</sub> larvae<br>Oral LD <sub>50</sub> larvae] | 208.0 µg a.s./larva/day<br>[213.07 µg a.s./larva/day<br>220.96 µg a.s./larva/day<br>243.4 µg a.s./larva/day] |

|                                                                |
|----------------------------------------------------------------|
| Potential for accumulative toxicity: Information not available |
| Semi-field test (Cage and tunnel test)<br>Not available        |
| Field tests<br>Not available                                   |

**Risk assessment for spray application at 30 g a.s./ha x 1**

| Species                                                            | Test substance                                                                         | Risk quotient                     | HQ/ETR                       | Trigger |
|--------------------------------------------------------------------|----------------------------------------------------------------------------------------|-----------------------------------|------------------------------|---------|
| <b>Contact and oral screening assessment for spray application</b> |                                                                                        |                                   |                              |         |
| Honeybee<br><i>Apis mellifera</i>                                  | Tribenuron.methyl technical<br>Tribenuron methyl 50SG<br>Tribenuron-methyl 750 g/kg WG | HQ <sub>contact</sub>             | < 0.3<br>< 0.15<br>< 0.3     | 42      |
|                                                                    | Tribenuron.methyl technical<br>Tribenuron methyl 50SG<br>Tribenuron-methyl 750 g/kg WG | ETR <sub>acute</sub> adult oral   | < 0.025<br>0.0068<br>< 0.002 | 0.2     |
|                                                                    | Tribenuron.methyl technical<br>Tribenuron-methyl 750 g/kg WG                           | ETR <sub>chronic</sub> adult oral | < 0.003<br>< 0.0015          | 0.03    |
|                                                                    | Tribenuron-methyl 750 g/kg WG                                                          | ETR <sub>hpg</sub>                | 0.0015                       | 1       |
| <b>Assessment of risk from exposure to contaminated water</b>      |                                                                                        |                                   |                              |         |
| <b>Guttation water</b>                                             |                                                                                        |                                   |                              |         |

|                                   |                                                                                        |                       |                                                                            |      |
|-----------------------------------|----------------------------------------------------------------------------------------|-----------------------|----------------------------------------------------------------------------|------|
| Honeybee<br><i>Apis mellifera</i> | Tribenuron.methyl technical<br>Tribenuron methyl 50SG<br>Tribenuron-methyl 750 g/kg WG | ETRacute adult oral   | < <b>3.1</b><br><b>0.84</b><br>< <b>0.26</b>                               | 0.2  |
|                                   | Tribenuron.methyl technical<br>Tribenuron-methyl 750 g/kg WG                           | ETRchronic adult oral | < <b>0.2</b><br>< <b>0.1</b>                                               | 0.03 |
|                                   | Tribenuron-methyl 750 g/kg WG                                                          | ETRhpg                | 0.1                                                                        | 1    |
| <b>Surface water</b>              |                                                                                        |                       |                                                                            |      |
| Honeybee<br><i>Apis mellifera</i> | Tribenuron.methyl technical<br>Tribenuron methyl 50SG<br>Tribenuron-methyl 750 g/kg WG | ETRacute adult oral   | < $1.6 \times 10^{-6}$<br>$0.43 \times 10^{-6}$<br>< $0.13 \times 10^{-6}$ | 0.2  |
|                                   | Tribenuron.methyl technical<br>Tribenuron-methyl 750 g/kg WG                           | ETRchronic adult oral | < $0.2 \times 10^{-6}$<br>< $0.096 \times 10^{-6}$                         | 0.03 |
|                                   |                                                                                        |                       |                                                                            |      |
| <b>Puddle water</b>               |                                                                                        |                       |                                                                            |      |
| <b>Data gap</b>                   |                                                                                        |                       |                                                                            |      |

**Effects on other arthropod species (Regulation (EU) N° 283/2013, Annex Part A, point 8.3.2 and Regulation (EU) N° 284/2013 Annex Part A, point 10.3.2)**
**Laboratory tests with standard sensitive species**

| Species                                          | Test Substance                                | End point                                                                                   | Toxicity                                      |
|--------------------------------------------------|-----------------------------------------------|---------------------------------------------------------------------------------------------|-----------------------------------------------|
| <i>Aphidius rhopalosiphi</i><br>(parasitic wasp) | Tribenuron methyl 75WG                        | 48-h LR <sub>50</sub><br>[and ER <sub>50</sub> (fecundity)]                                 | > 30                                          |
|                                                  | Tribenuron methyl 50SG                        | 48-h LR <sub>50</sub><br>[and ER <sub>50</sub> (fecundity)] <sup>a</sup>                    | > 300                                         |
|                                                  | Tribenuron methyl 50SG + DPX-KG691 surfactant | 48-h LR <sub>50</sub>                                                                       | > <b>29.6</b> <sup>b</sup>                    |
|                                                  | Tribenuron-Methyl 750 g/kg WG                 | 48-h LR <sub>50</sub><br>[ER <sub>50</sub> (fecundity)] <sup>a</sup><br>[NOEL] <sup>a</sup> | > <b>150</b> <sup>c</sup><br>[> 150]<br>[150] |
| <i>Typhlodromus pyri</i><br>(predatory mite)     | Tribenuron methyl 75WG                        | 7-d LR <sub>50</sub><br>[and ER <sub>50</sub> (fecundity)]                                  | > 30                                          |
|                                                  | Tribenuron methyl 50SG                        | 7-d LR <sub>50</sub><br>[and ER <sub>50</sub> (fecundity)]                                  | > 300                                         |
|                                                  | Tribenuron methyl 50SG + DPX-KG691 surfactant | 7-d LR <sub>50</sub><br>[and ER <sub>50</sub> (fecundity)]                                  | > <b>29.6</b> <sup>b</sup>                    |
|                                                  | Tribenuron-Methyl 750 g/kg WG                 | 7-d LR <sub>50</sub><br>[ER <sub>50</sub> (fecundity)]<br>[NOEL]                            | > <b>150</b> <sup>c</sup><br>[> 150]<br>[150] |
| <b>Additional species</b>                        |                                               |                                                                                             |                                               |
| <i>Chrysoperla carnea</i><br>(green lacewing)    | Tribenuron methyl 75WG                        | 12-d LR <sub>50</sub><br>[and ER <sub>50</sub> (fecundity)]                                 | > 30                                          |
|                                                  | Tribenuron methyl 50SG                        | 14-d LR <sub>50</sub><br>[and ER <sub>50</sub> (fecundity)]                                 | > 300                                         |
| <i>Poecilus cupreus</i><br>(ground beetle)       | Tribenuron methyl 75WG                        | 14-d LR <sub>50</sub><br>[and ER <sub>50</sub> (fecundity)]                                 | > 30                                          |
| <i>Orius laevigatus</i><br>(flower bug)          | Tribenuron methyl 50SG                        | 9-d LR <sub>50</sub><br>[and ER <sub>50</sub> (fecundity)]                                  | > 300                                         |

a Due to the high variance in reproduction at all treatment levels, this value (ER<sub>50</sub> or NOEL) should be treated with caution.

b Value selected for risk assessment for the representative formulation Tribenuron methyl 50SG + DPX-KG691 surfactant (DUP).

c Value selected for risk assessment for the representative formulation Tribenuron-Methyl 750 g/kg WG (TTF).

**DUP: First tier risk assessment for sunflowers at 30 g a.s./ha x 1 (Tribenuron methyl 50SG, DPX-L5300 + DPX-KG691 surfactant)**

| Test substance                                | Species                      | Effect (LR <sub>50</sub> g/ha) | HQ in-field | HQ off-field <sup>a)</sup> | Trigger |
|-----------------------------------------------|------------------------------|--------------------------------|-------------|----------------------------|---------|
| Tribenuron methyl 50SG + DPX-KG691 surfactant | <i>Typhlodromus pyri</i>     | > 29.6                         | < 1.01      | < 0.028                    | 2       |
|                                               | <i>Aphidius rhopalosiphi</i> | > 29.6                         | < 1.01      | < 0.028                    | 2       |

a) Drift rate: 2.77% estimated at 1 m distance from field according to Rautmann et al., 2001.

**TTF: First tier risk assessment for cereals at 30 g a.s./ha x 1 (Tribenuron-Methyl 750 g/kg WG, CHA 6310)**

| Test substance                | Species                      | Effect (LR <sub>50</sub> g/ha) | HQ in-field | HQ off-field <sup>a)</sup> | Trigger |
|-------------------------------|------------------------------|--------------------------------|-------------|----------------------------|---------|
| Tribenuron-Methyl 750 g/kg WG | <i>Typhlodromus pyri</i>     | > 150                          | < 0.2       | < 0.006                    | 2       |
|                               | <i>Aphidius rhopalosiphi</i> | > 150                          | < 0.2       | < 0.006                    | 2       |

a) Drift rate: 2.77% estimated at 1 m distance from field according to Rautmann et al., 2001.

**Extended laboratory tests, aged residue tests**

|               |
|---------------|
| Not available |
|---------------|

**Risk assessment based on extended lab test or aged residue tests**

|                                         |
|-----------------------------------------|
| Not required                            |
| Semi-field tests: Not available         |
| Field studies: Not available            |
| Additional specific test: Not available |

**Effects on non-target soil meso- and macro fauna; effects on soil nitrogen transformation (Regulation (EU) N° 283/2013, Annex Part A, points 8.4, 8.5, and Regulation (EU) N° 284/2013 Annex Part A, points 10.4, 10.5)**

| Test organism         | Test substance                                | Application method of test a.s./ OM                                                                                                                                                                                                                                                                                                                                                                                                                                                               | Time scale       | End point                      | Toxicity                                                     |
|-----------------------|-----------------------------------------------|---------------------------------------------------------------------------------------------------------------------------------------------------------------------------------------------------------------------------------------------------------------------------------------------------------------------------------------------------------------------------------------------------------------------------------------------------------------------------------------------------|------------------|--------------------------------|--------------------------------------------------------------|
| <b>Earthworms</b>     |                                               |                                                                                                                                                                                                                                                                                                                                                                                                                                                                                                   |                  |                                |                                                              |
| <i>Eisenia fetida</i> | Tribenuron-methyl technical                   | Test item incorporated into the soil / 5% peat                                                                                                                                                                                                                                                                                                                                                                                                                                                    | Chronic, 56 days | NOEC <sup>a</sup>              | <b>3.2 mg a.s./kg dry soil</b>                               |
| <i>Eisenia fetida</i> | Tribenuron methyl 50SG + DPX-KG691 surfactant | Test item incorporated into the soil / 5% peat                                                                                                                                                                                                                                                                                                                                                                                                                                                    | Chronic, 56 days | NOEC<br>EC <sub>10</sub> repro | <b>61.75 mg a.s./kg dry soil</b><br>70.5 mg a.s./kg dry soil |
| <i>Eisenia fetida</i> | IN-00581 (saccharin)                          | Test item incorporated into the soil / 10% peat                                                                                                                                                                                                                                                                                                                                                                                                                                                   | Chronic, 56 days | NOEC <sup>a</sup>              | 0.05 mg/kg dry soil                                          |
| <i>Eisenia fetida</i> | IN-00581 (saccharin)                          | Test item incorporated into the soil / 5% peat                                                                                                                                                                                                                                                                                                                                                                                                                                                    | Chronic, 56 days | NOEC <sup>a</sup>              | <b>100 mg/kg dry soil</b>                                    |
| <i>Eisenia fetida</i> | IN-00581 (saccharin)                          | This metabolite was also evaluated for metsulfuron-methyl, ethametsulfuron-methyl and propoxycarbazone-sodium (EFSA, 2014a, 2015a, 2016b). The lowest reported NOECs were lower than 100 mg/kg dry soil, it is noted that this endpoints were set at the highest concentration tested. There was only a NOEC = 0.04 mg/kg dry soil not set at the highest concentration tested, however, concerns were raised during the peer review on this endpoint and it was not used in the risk assessment. |                  |                                |                                                              |
| <i>Eisenia fetida</i> | IN-A4098 (N-demethyl-triazine amine)          | Test item incorporated into the soil / 10% peat                                                                                                                                                                                                                                                                                                                                                                                                                                                   | Chronic, 56 days | NOEC <sup>a</sup>              | 0.2 mg/kg dry soil                                           |
| <i>Eisenia fetida</i> | IN-A4098 (N-demethyl-triazine amine)          | Test item incorporated into the soil / 10% peat                                                                                                                                                                                                                                                                                                                                                                                                                                                   | Chronic, 56 days | NOEC <sup>a</sup>              | <b>8.0 mg/kg dry soil</b>                                    |
| <i>Eisenia fetida</i> | IN-A4098 (N-demethyl-triazine amine)          | This metabolite was also evaluated for chlorsulfuron, iodosulfuron-methyl-sodium, thifensulfuron-methyl, metsulfuron-methyl, prosulfuron and triasulfuron (EFSA, 2008; 2014b; 2015a,b,c; 2016a). The lowest reported NOECs were 0.2 and 0.202 mg/lg dry soil. The use of these endpoints in the risk assessment would not change the outcome, therefore, the risk assessment was not updated.                                                                                                     |                  |                                |                                                              |
| <i>Eisenia fetida</i> | IN-D5119 (acid sulfonamide)                   | Test item incorporated into the soil / 10% peat                                                                                                                                                                                                                                                                                                                                                                                                                                                   | Chronic, 56 days | NOEC <sup>a</sup>              | 1000 mg/kg dry soil                                          |
| <i>Eisenia fetida</i> | IN-D5119 (acid sulfonamide)                   | This metabolite was also evaluated for ethametsulfuron-methyl (EFSA, 2014a). The reported NOEC was 1000 mg/kg dry soil.                                                                                                                                                                                                                                                                                                                                                                           |                  |                                |                                                              |
| <i>Eisenia fetida</i> | IN-D5803 (sulfonamide)                        | Test item incorporated into the soil / 5% peat                                                                                                                                                                                                                                                                                                                                                                                                                                                    | Chronic, 56 days | NOEC <sup>a</sup>              | <b>100 mg/kg dry soil</b>                                    |
| <i>Eisenia fetida</i> | IN-D5803 (sulfonamide)                        | This metabolite was also evaluated for metsulfuron-methyl and ethametsulfuron-methyl (EFSA, 2014a, 2015a). The lowest reported NOEC was 100 mg/kg dry soil.                                                                                                                                                                                                                                                                                                                                       |                  |                                |                                                              |
| <i>Eisenia fetida</i> | IN-GK521 (O-demethyl-tribenuron methyl)       | Test item incorporated into the soil / 10% peat                                                                                                                                                                                                                                                                                                                                                                                                                                                   | Chronic, 56 days | NOEC <sup>a</sup>              | <b>100 mg/kg dry soil</b>                                    |
| <i>Eisenia fetida</i> | IN-GK521 (O-demethyl-tribenuron methyl)       | Test item incorporated into the soil / 5% peat                                                                                                                                                                                                                                                                                                                                                                                                                                                    | Chronic, 56 days | NOEC <sup>a</sup>              | 1.52 mg/kg dry soil                                          |
| <i>Eisenia fetida</i> | IN-GN815 (O-demethyl-tribenuron free acid)    | Test item incorporated into the soil / 10% peat                                                                                                                                                                                                                                                                                                                                                                                                                                                   | Chronic, 56 days | NOEC <sup>a</sup>              | 100 mg/kg dry soil                                           |
| <i>Eisenia fetida</i> | IN-GN815 (O-demethyl-tribenuron free acid)    | Test item incorporated into the soil / 5% peat                                                                                                                                                                                                                                                                                                                                                                                                                                                    | Chronic, 56 days | NOEC <sup>a</sup>              | 3.2 mg/kg dry soil                                           |

| Test organism                    | Test substance                                | Application method of test a.s./ OM                                                                                                                                                                                                                                                                                                                                                                                                                                                        | Time scale       | End point                                       | Toxicity                                                                                                               |
|----------------------------------|-----------------------------------------------|--------------------------------------------------------------------------------------------------------------------------------------------------------------------------------------------------------------------------------------------------------------------------------------------------------------------------------------------------------------------------------------------------------------------------------------------------------------------------------------------|------------------|-------------------------------------------------|------------------------------------------------------------------------------------------------------------------------|
|                                  | acid)                                         |                                                                                                                                                                                                                                                                                                                                                                                                                                                                                            |                  |                                                 |                                                                                                                        |
| <i>Eisenia fetida</i>            | IN-L5296 (triazine amine)                     | Test item incorporated into the soil / 10% peat                                                                                                                                                                                                                                                                                                                                                                                                                                            | Chronic, 56 days | NOEC <sup>a</sup>                               | <b>0.2 mg/kg dry soil</b>                                                                                              |
| <i>Eisenia fetida</i>            | IN-R9803 (tribenuron free acid)               | Test item incorporated into the soil / 10% peat                                                                                                                                                                                                                                                                                                                                                                                                                                            | Chronic, 56 days | NOEC                                            | <b>6.0 mg/kg dry soil</b>                                                                                              |
| <i>Eisenia fetida</i>            | IN-R9805 (O-demethyl-triazine amine)          | Test item incorporated into the soil / 5% peat                                                                                                                                                                                                                                                                                                                                                                                                                                             | Chronic, 56 days | NOEC <sup>a</sup>                               | 100 mg/kg dry soil                                                                                                     |
| <i>Eisenia fetida</i>            | IN-R9805 (O-demethyl-triazine amine)          | Test item incorporated into the soil / 10% peat                                                                                                                                                                                                                                                                                                                                                                                                                                            | Chronic, 56 days | NOEC <sup>a</sup>                               | <b>1000 mg/kg dry soil</b>                                                                                             |
| <i>Eisenia fetida</i>            | M2 (triazine urea)                            | Test item incorporated into the soil / 5% peat                                                                                                                                                                                                                                                                                                                                                                                                                                             | Chronic, 56 days | NOEC                                            | <b>5.0 mg/kg dry soil</b>                                                                                              |
| <i>Eisenia fetida</i>            | Tribenuron-methyl technical                   | Not evaluated                                                                                                                                                                                                                                                                                                                                                                                                                                                                              | Acute, 14 days   | LC50                                            | > 1000 mg a.s./kg dry soil                                                                                             |
| <i>Eisenia fetida</i>            | Tribenuron methyl 75WG                        | Not evaluated                                                                                                                                                                                                                                                                                                                                                                                                                                                                              | Acute, 14 days   | LC50                                            | > 1000 mg prod./kg dry soil                                                                                            |
| <i>Eisenia fetida</i>            | Tribenuron methyl 50SG                        | Not evaluated                                                                                                                                                                                                                                                                                                                                                                                                                                                                              | Acute, 14 days   | LC50                                            | > 1000 mg prod./kg dry soil                                                                                            |
| <i>Eisenia fetida</i>            | IN-00581 (saccharin)                          | Not evaluated                                                                                                                                                                                                                                                                                                                                                                                                                                                                              | Acute, 14 days   | LC50                                            | > 1 mg/kg dry soil                                                                                                     |
| <i>Eisenia fetida</i>            | IN-A4098 (N-demethyl-triazine amine)          | Not evaluated                                                                                                                                                                                                                                                                                                                                                                                                                                                                              | Acute, 14 days   | LC50                                            | > 1000 mg/kg dry soil                                                                                                  |
| <i>Eisenia fetida</i>            | IN-A4098 (N-demethyl-triazine amine)          | Not evaluated                                                                                                                                                                                                                                                                                                                                                                                                                                                                              | Acute, 14 days   | LC50                                            | > 1000 mg/kg dry soil                                                                                                  |
| <i>Eisenia fetida</i>            | IN-A4098 (N-demethyl-triazine amine)          | Not evaluated                                                                                                                                                                                                                                                                                                                                                                                                                                                                              | Acute, 14 days   | LC50                                            | > 1000 mg/kg dry soil                                                                                                  |
| <i>Eisenia fetida</i>            | IN-L5296 (triazine amine)                     | Not evaluated                                                                                                                                                                                                                                                                                                                                                                                                                                                                              | Acute, 14 days   | LC50                                            | > 10 mg/kg dry soil                                                                                                    |
| <b>Other soil macroorganisms</b> |                                               |                                                                                                                                                                                                                                                                                                                                                                                                                                                                                            |                  |                                                 |                                                                                                                        |
| <i>Folsomia candida</i>          | Tribenuron methyl 50SG + DPX-KG691 surfactant | Test item incorporated into the soil / 5% peat                                                                                                                                                                                                                                                                                                                                                                                                                                             | Chronic, 28 days | NOEC<br>[EC <sub>10</sub><br>EC <sub>20</sub> ] | 62.5 mg prod./kg dry soil = <b>30.8 mg a.s./kg dry soil</b><br>[53.2 mg a.s./kg dry soil<br>113.6 mg a.s./kg dry soil] |
| <i>Folsomia candida</i>          | IN-00581 (saccharin)                          | Test item incorporated into the soil / 10% peat                                                                                                                                                                                                                                                                                                                                                                                                                                            | Chronic, 28 days | NOEC <sup>a</sup>                               | <b>100 mg/kg dry soil</b>                                                                                              |
| <i>Folsomia candida</i>          | IN-00581 (saccharin)                          | Test item incorporated into the soil / 10% peat                                                                                                                                                                                                                                                                                                                                                                                                                                            | Chronic, 28 days | NOEC <sup>a</sup>                               | <b>100 mg/kg dry soil</b>                                                                                              |
| <i>Folsomia candida</i>          | IN-00581 (saccharin)                          | Test item incorporated into the soil / 10% peat                                                                                                                                                                                                                                                                                                                                                                                                                                            | Chronic, 28 days | NOEC <sup>a</sup>                               | <b>100 mg/kg dry soil</b>                                                                                              |
| <i>Folsomia candida</i>          | IN-00581 (saccharin)                          | This metabolite was also evaluated for metsulfuron-methyl, ethametsulfuron-methyl and propoxycarbazone-sodium (EFSA, 2014a, 2015a, 2016b). The reported NOEC values were 9.0 and 100 mg/kg dry soil. The NOEC of 9.0 mg/kg dry soil was based on absence of statistically significant effects up to and including the highest tested concentration of 9.0 mg/kg soil. Hence, it is not considered as adverse data.                                                                         |                  |                                                 |                                                                                                                        |
| <i>Folsomia candida</i>          | IN-A4098 (N-demethyl-triazine amine)          | Test item incorporated into the soil / 10% peat                                                                                                                                                                                                                                                                                                                                                                                                                                            | Chronic, 28 days | NOEC <sup>a</sup>                               | 0.225 mg/kg dry soil                                                                                                   |
| <i>Folsomia candida</i>          | IN-A4098 (N-demethyl-triazine amine)          | Test item incorporated into the soil / 5% peat                                                                                                                                                                                                                                                                                                                                                                                                                                             | Chronic, 28 days | NOEC <sup>a</sup>                               | <b>37.1 mg/kg dry soil</b>                                                                                             |
| <i>Folsomia candida</i>          | IN-A4098 (N-demethyl-triazine amine)          | This metabolite was also evaluated for chlorsulfuron, iodosulfuron-methyl-sodium, thifensulfuron-methyl, metsulfuron-methyl, prosulfuron and triasulfuron (EFSA, 2008, 2014b, 2015a,b,c, 2016a). The lowest reported NOEC was 0.045 mg/kg dry soil from the RAR for thifensulfuron-methyl. Based on the information provided by EFSA it was not possible to conclude if this NOEC should be considered as adverse data, since possible effects at higher concentrations were not reported. |                  |                                                 |                                                                                                                        |

| Test organism              | Test substance                                | Application method of test a.s./ OM                                                                                                                                                                                                                                                                                                                                                                             | Time scale       | End point                                       | Toxicity                                                                                  |
|----------------------------|-----------------------------------------------|-----------------------------------------------------------------------------------------------------------------------------------------------------------------------------------------------------------------------------------------------------------------------------------------------------------------------------------------------------------------------------------------------------------------|------------------|-------------------------------------------------|-------------------------------------------------------------------------------------------|
| <i>Folsomia candida</i>    | IN-D5119 (acid sulfonamide)                   | Test item incorporated into the soil / 10% peat                                                                                                                                                                                                                                                                                                                                                                 | Chronic, 28 days | NOEC <sup>a</sup>                               | 100 mg/kg dry soil                                                                        |
| <i>Folsomia candida</i>    | IN-D5119 (acid sulfonamide)                   | This metabolite was also evaluated for ethametsulfuron-methyl (EFSA, 2014a). The reported NOEC was 100 mg/kg dry soil.                                                                                                                                                                                                                                                                                          |                  |                                                 |                                                                                           |
| <i>Folsomia candida</i>    | IN-D5803 (sulfonamide)                        | Test item incorporated into the soil / 5% peat                                                                                                                                                                                                                                                                                                                                                                  | Chronic, 28 days | NOEC <sup>a</sup>                               | <b>100 mg/kg dry soil</b>                                                                 |
| <i>Folsomia candida</i>    | IN-D5803 (sulfonamide)                        | This metabolite was also evaluated for ethametsulfuron-methyl (EFSA, 2014a). The reported NOEC was 100 mg/kg dry soil.                                                                                                                                                                                                                                                                                          |                  |                                                 |                                                                                           |
| <i>Folsomia candida</i>    | IN-GK521 (O-demethyl-tribenuron methyl)       | Test item incorporated into the soil / 5% peat                                                                                                                                                                                                                                                                                                                                                                  | Chronic, 28 days | NOEC <sup>a</sup>                               | <b>100 mg/kg dry soil</b>                                                                 |
| <i>Folsomia candida</i>    | IN-GN815 (O-demethyl-tribenuron free acid)    | Test item incorporated into the soil / 5% peat                                                                                                                                                                                                                                                                                                                                                                  | Chronic, 28 days | NOEC <sup>a</sup>                               | 100 mg/kg dry soil                                                                        |
| <i>Folsomia candida</i>    | IN-L5296 (triazine amine)                     | Test item incorporated into the soil / 10% peat                                                                                                                                                                                                                                                                                                                                                                 | Chronic, 28 days | NOEC<br>[EC <sub>10</sub><br>EC <sub>20</sub> ] | <b>0.116 mg/kg dry soil</b><br><b>[0.47 mg/kg dry soil</b><br><b>1.01 mg/kg dry soil]</b> |
| <i>Folsomia candida</i>    | IN-R9803 (tribenuron free acid)               | Test item incorporated into the soil / 5% peat                                                                                                                                                                                                                                                                                                                                                                  | Chronic, 28 days | NOEC <sup>a</sup>                               | <b>100 mg/kg dry soil</b>                                                                 |
| <i>Folsomia candida</i>    | IN-R9805 (O-demethyl-triazine amine)          | Test item incorporated into the soil / 5% peat                                                                                                                                                                                                                                                                                                                                                                  | Chronic, 28 days | NOEC <sup>a</sup>                               | <b>100 mg/kg dry soil</b>                                                                 |
| <i>Folsomia candida</i>    | M2 (triazine urea)                            | No data available. Estimated as 10 times more toxic than the active substance                                                                                                                                                                                                                                                                                                                                   |                  | NOEC                                            | <b>3 mg/kg dry soil</b>                                                                   |
| <i>Hypoaspis aculeifer</i> | Tribenuron methyl 50SG + DPX-KG691 surfactant | Test item incorporated into the soil / 5% peat                                                                                                                                                                                                                                                                                                                                                                  | Chronic, 28 days | NOEC                                            | <b>493 mg a.s./kg dry soil *</b>                                                          |
| <i>Hypoaspis aculeifer</i> | IN-00581 (saccharin)                          | Test item incorporated into the soil / 5% peat                                                                                                                                                                                                                                                                                                                                                                  | Chronic, 28 days | NOEC <sup>a</sup>                               | <b>100 mg/kg dry soil</b>                                                                 |
| <i>Hypoaspis aculeifer</i> | IN-00581 (saccharin)                          | Test item incorporated into the soil / 5% peat                                                                                                                                                                                                                                                                                                                                                                  | Chronic, 28 days | NOEC                                            | <b>1000 mg/kg dry soil**</b>                                                              |
| <i>Hypoaspis aculeifer</i> | IN-00581 (saccharin)                          | This metabolite was also evaluated for metsulfuron-methyl, ethametsulfuron-methyl and propoxycarbazone-sodium (EFSA, 2014a, 2015a, 2016b). The reported NOEC values were 10 and 100 mg/kg dry soil. The NOEC of 10 mg/kg dry soil was based on absence of statistically significant effects up to and including the highest tested concentration of 10 mg/kg soil. Hence, it is not considered as adverse data. |                  |                                                 |                                                                                           |
| <i>Hypoaspis aculeifer</i> | IN-A4098 (N-demethyl-triazine amine)          | Test item incorporated into the soil / 5% peat                                                                                                                                                                                                                                                                                                                                                                  | Chronic, 28 days | NOEC <sup>a</sup>                               | <b>100 mg/kg dry soil</b>                                                                 |
| <i>Hypoaspis aculeifer</i> | IN-A4098 (N-demethyl-triazine amine)          | Test item incorporated into the soil / 5% peat                                                                                                                                                                                                                                                                                                                                                                  | Chronic, 28 days | NOEC<br>EC <sub>10</sub><br>EC <sub>20</sub>    | <b>100 mg/kg dry soil</b><br>111 mg/kg dry soil<br>248 mg/kg dry soil                     |
| <i>Hypoaspis aculeifer</i> | IN-A4098 (N-demethyl-triazine amine)          | This metabolite was also evaluated for iodosulfuron-methyl-sodium, thifensulfuron-methyl, metsulfuron-methyl, prosulfuron and triasulfuron (EFSA, 2014b, 2015a,b,c, 2016a). NOEC values of 98.7 and 100 mg/kg dry soil were reported.                                                                                                                                                                           |                  |                                                 |                                                                                           |
| <i>Hypoaspis aculeifer</i> | IN-D5119 (acid sulfonamide)                   | Test item incorporated into the soil / 5% peat                                                                                                                                                                                                                                                                                                                                                                  | Chronic, 28 days | NOEC <sup>a</sup>                               | 100 mg/kg dry soil                                                                        |
| <i>Hypoaspis aculeifer</i> | IN-D5803 (sulfonamide)                        | Test item incorporated into the soil / 5% peat                                                                                                                                                                                                                                                                                                                                                                  | Chronic, 28 days | NOEC <sup>a</sup>                               | <b>100 mg/kg dry soil</b>                                                                 |
| <i>Hypoaspis aculeifer</i> | IN-GK521 (O-demethyl-tribenuron methyl)       | Test item incorporated into the soil / 5% peat                                                                                                                                                                                                                                                                                                                                                                  | Chronic, 28 days | NOEC                                            | <b>25 mg/kg dry soil</b>                                                                  |
| <i>Hypoaspis aculeifer</i> | IN-GN815 (O-demethyl-tribenuron free acid)    | Test item incorporated into the soil / 5% peat                                                                                                                                                                                                                                                                                                                                                                  | Chronic, 28 days | NOEC <sup>a</sup>                               | 100 mg/kg dry soil                                                                        |
| <i>Hypoaspis aculeifer</i> | IN-L5296 (triazine amine)                     | Test item incorporated into the soil / 5% peat                                                                                                                                                                                                                                                                                                                                                                  | Chronic, 28 days | NOEC <sup>a</sup>                               | 100 mg/kg dry soil                                                                        |
| <i>Hypoaspis aculeifer</i> | IN-L5296 (triazine amine)                     | Test item incorporated into the soil / 5% peat                                                                                                                                                                                                                                                                                                                                                                  | Chronic, 28 days | NOEC<br>EC <sub>10</sub><br>EC <sub>20</sub>    | 562 mg/kg dry soil<br><b>403 mg/kg dry soil</b><br>667 mg/kg dry soil                     |



| Test organism              | Test substance                       | Application method of test a.s./ OM            | Time scale       | End point         | Toxicity                  |
|----------------------------|--------------------------------------|------------------------------------------------|------------------|-------------------|---------------------------|
| <i>Hypoaspis aculeifer</i> | IN-R9803 (tribenuron free acid)      | Test item incorporated into the soil / 5% peat | Chronic, 28 days | NOEC <sup>a</sup> | <b>100 mg/kg dry soil</b> |
| <i>Hypoaspis aculeifer</i> | IN-R9805 (O-demethyl-triazine amine) | Test item incorporated into the soil / 5% peat | Chronic, 28 days | NOEC              | <b>50 mg/kg dry soil</b>  |
| <i>Hypoaspis aculeifer</i> | M2 (triazine urea)                   | -                                              | -                | -                 | No data available         |

\* In the study from Schöbinger 2013, a 26% increase in reproduction was observed. It is uncertain whether such effect could be considered as adverse at population level. In addition it is noted that the standard deviation in the control was 18.2% and a higher mortality in the control than in the treatment was observed (13% against 0%). This adds uncertainties on the biological significance of this finding. In light of the above the endpoint was set at 493 mg a.s./kg soil.

\*\* An increase in the reproduction was observed at this concentration. It is uncertain whether such effect could be considered as adverse at population level

| Higher tier testing (e.g. modelling or field studies) |
|-------------------------------------------------------|
| Not available                                         |

| Measurement parameter           | Test substance                                | Time scale                                                                                                                                                                                                                         | No effects (< 25 % difference to control) up to <sup>a</sup>                    |
|---------------------------------|-----------------------------------------------|------------------------------------------------------------------------------------------------------------------------------------------------------------------------------------------------------------------------------------|---------------------------------------------------------------------------------|
| Nitrogen transformation         | Tribenuron methyl 75WG                        | 28 days                                                                                                                                                                                                                            | 0.275 mg prod./kg dry soil<br>= 0.21 mg a.s./kg dry soil                        |
|                                 | Tribenuron methyl 50SG                        | 28 days                                                                                                                                                                                                                            | 0.800 mg prod./kg dry soil<br>= 0.41 mg a.s./kg dry soil                        |
|                                 | Tribenuron methyl 50SG + DPX-KG691 surfactant | 28 days                                                                                                                                                                                                                            | 0.800 mg prod./kg dry soil<br>= 0.39 mg a.s./kg dry soil                        |
|                                 | Tribenuron-methyl 750 g/kg WG                 | 56 days                                                                                                                                                                                                                            | 0.533 mg prod./kg dry soil<br>= 0.40 mg a.s./kg dry soil                        |
|                                 | IN-00581 (saccharine)                         | 28 days                                                                                                                                                                                                                            | 0.20 mg/kg dry soil                                                             |
|                                 | IN-00581 (saccharine)                         | 28 days                                                                                                                                                                                                                            | 0.0511 mg/kg dry soil                                                           |
|                                 | IN-00581 (saccharine)                         | 42 days                                                                                                                                                                                                                            | 0.204 mg/kg dry soil                                                            |
|                                 | IN-00581 (saccharin)                          | This metabolite was also evaluated for metsulfuron-methyl, ethametsulfuron-methyl and propoxycarbazone-sodium (EFSA, 2014a, 2015a, 2016b). No adverse data were identified.                                                        |                                                                                 |
|                                 | IN-A4098 (N-demethyl-triazine amine)          | 28 days                                                                                                                                                                                                                            | 0.0397 mg/kg dry soil                                                           |
|                                 | IN-A4098 (N-demethyl-triazine amine)          | This metabolite was also evaluated for chloresulfuron, iodosulfuron-methyl-sodium, thifensulfuron-methyl, metsulfuron-methyl, prosulfuron and triasulfuron (EFSA, 2008, 2014b, 2015a,b,c, 2016a). No adverse data were identified. |                                                                                 |
|                                 | IN-D5119 (acid sulfonamide)                   | 28 days                                                                                                                                                                                                                            | 0.0533 mg/kg dry soil                                                           |
|                                 | IN-D5119 (acid sulfonamide)                   | This metabolite was also evaluated for ethametsulfuron-methyl (EFSA, 2014a). No adverse data were identified.                                                                                                                      |                                                                                 |
|                                 | IN-D5803 (sulfonamide)                        | 42 days                                                                                                                                                                                                                            | 0.0597 mg/kg dry soil                                                           |
|                                 | IN-D5803 (sulfonamide)                        | This metabolite was also evaluated for metsulfuron-methyl and ethametsulfuron-methyl (EFSA, 2014a, 2015a). No adverse data were identified.                                                                                        |                                                                                 |
|                                 | IN-GK521 (O-demethyl tribenuron methyl)       | 28 days                                                                                                                                                                                                                            | 1.62 mg/kg dry soil                                                             |
|                                 | IN-GK521 (O-demethyl Tribenuron-methyl)       | 28 days                                                                                                                                                                                                                            | 0.2 mg/kg dry soil                                                              |
|                                 | IN-GN815 (O-demethyl-tribenuron free acid)    | 28 days                                                                                                                                                                                                                            | 1.41 mg/kg dry soil                                                             |
|                                 | IN-GN815 (O-demethyl-tribenuron free acid)    | 28 days                                                                                                                                                                                                                            | 0.2 mg/kg dry soil                                                              |
|                                 | IN-L5296 (triazine amine)                     | No data                                                                                                                                                                                                                            | 0.02 mg/kg dry soil, estimated as 10 times more toxic than the active substance |
| IN-R9803 (tribenuron free acid) | 28 days                                       | 1.17 mg/kg dry soil                                                                                                                                                                                                                |                                                                                 |
| IN-R9803 (tribenuron free acid) | 28 days                                       | 0.4 mg/kg dry soil                                                                                                                                                                                                                 |                                                                                 |

|  |                                      |         |                    |
|--|--------------------------------------|---------|--------------------|
|  | IN-R9805 (O-demethyl-triazine amine) | 28 days | 200 mg/kg dry soil |
|  | M2 (triazine urea)                   | 28 days | 0.2 mg/kg dry soil |

a All values = the highest tested concentrations.

#### DUP: Toxicity/exposure ratios for soil organisms for sunflowers at 30 g a.s./ha x 1 (Tribenuron methyl 50SG, DPX-L5300 + DPX-KG691 surfactant)

| Test organism              | Test substance                                | NOEC (mg/kg dry soil)   | PEC <sub>soil, plateau</sub> (mg/kg dry soil) | TER     | Trigger |
|----------------------------|-----------------------------------------------|-------------------------|-----------------------------------------------|---------|---------|
| Earthworms                 |                                               |                         |                                               |         |         |
| <i>Eisenia fetida</i>      | Tribenuron-methyl technical                   | 3.2                     | 0.040                                         | 80      | 5       |
|                            | Tribenuron methyl 50SG + DPX-KG691 surfactant | 61.75 <sup>a</sup>      | 0.040 <sup>a</sup>                            | 1544    | 5       |
|                            | IN-00581                                      | 100                     | 0.0096                                        | 10417   | 5       |
|                            | IN-A4098                                      | 8.0                     | 0.0029                                        | 2759    | 5       |
|                            | IN-GK521                                      | 100                     | 0.04 <sup>b</sup>                             | 2500    | 5       |
|                            | IN-L5296                                      | 0.2                     | 0.0263                                        | 8       | 5       |
|                            | IN-R9805                                      | 1000                    | 0.0022                                        | 454545  | 5       |
| M2                         | 5.0                                           | 0.0032                  | 1563                                          | 5       |         |
| Other soil macroorganisms  |                                               |                         |                                               |         |         |
| <i>Folsomia candida</i>    | Tribenuron methyl 50SG + DPX-KG691 surfactant | 30.8 <sup>a</sup>       | 0.040 <sup>a</sup>                            | 770     | 5       |
|                            | IN-00581                                      | 1000                    | 0.0096                                        | 104170  | 5       |
|                            | IN-A4098                                      | 37.1                    | 0.0029                                        | 12793   | 5       |
|                            | IN-GK521                                      | 100                     | 0.04 <sup>b</sup>                             | 2500    | 5       |
|                            | IN-L5296                                      | 0.116                   | 0.0263 (Tier 1)                               | 4       | 5       |
|                            |                                               |                         | 0.0166 (Tier 2) <sup>c</sup>                  | 7       | 5       |
|                            | IN-R9805                                      | 100                     | 0.0022                                        | 45455   | 5       |
| M2                         | 3                                             | 0.0032                  | 938                                           | 5       |         |
| <i>Hypoaspis aculeifer</i> | Tribenuron methyl 50SG + DPX-KG691 surfactant | 493                     | 0.040                                         | 12325   | 5       |
|                            | IN-00581                                      | 100                     | 0.0096                                        | 10417   | 5       |
|                            | IN-A4098                                      | 100                     | 0.0029                                        | 34483   | 5       |
|                            | IN-GK521                                      | 25                      | 0.04 <sup>b</sup>                             | 625     | 5       |
|                            | IN-L5296                                      | 403 (EC <sub>10</sub> ) | 0.0263                                        | 15323   | 5       |
|                            | IN-R9805                                      | 50                      | 0.0022                                        | 22727   | 5       |
|                            | M2                                            | No data available       | 0.0032                                        | No data | 5       |

a Expressed as mg tribenuron-methyl / kg dry soil

b Since no PEC<sub>soil</sub> calculations were provided, worst case PEC<sub>soil</sub> for parent was used in the risk assessment.

c Tillage considered

#### TTF: Toxicity/exposure ratios for soil organisms for cereals at 30 g a.s./ha x 1 (Tribenuron-Methyl 750 g/kg WG, CHA 6310)

| Test organism             | Test substance              | NOEC (mg/kg dry soil) | PEC <sub>soil, max</sub> (mg/kg dry soil) | PEC <sub>soil, plateau</sub> (mg/kg dry soil) | TER     | Trigger |
|---------------------------|-----------------------------|-----------------------|-------------------------------------------|-----------------------------------------------|---------|---------|
| Earthworms                |                             |                       |                                           |                                               |         |         |
| <i>Eisenia fetida</i>     | Tribenuron-methyl technical | 3.2                   | <b>0.030</b>                              | n.a.                                          | 107     | 5       |
|                           | IN-00581                    | 100                   | 0.005                                     | <b>0.006</b>                                  | 16667   | 5       |
|                           | IN-A4098                    | 8.0                   | 0.001                                     | <b>0.001</b>                                  | 8000    | 5       |
|                           | IN-D5803                    | 100                   | <b>0.008</b>                              | n.a.                                          | 12500   | 5       |
|                           | IN-GK521                    | 100                   | <b>0.009</b>                              | n.a.                                          | 11111   | 5       |
|                           | IN-L5296                    | 0.2                   | 0.010                                     | <b>0.013</b>                                  | 15      | 5       |
|                           | IN-R9803                    | 6.0                   | <b>0.003</b>                              | n.a.                                          | 2000    | 5       |
|                           | IN-R9805                    | 1000                  | 0.001                                     | <b>0.001</b>                                  | 1000000 | 5       |
| M2                        | 5.0                         | <b>0.002</b>          | n.a.                                      | 2500                                          | 5       |         |
| Other soil macroorganisms |                             |                       |                                           |                                               |         |         |

| Test organism              | Test substance                                | NOEC (mg/kg dry soil)      | PEC <sub>soil, max</sub> (mg/kg dry soil) | PEC <sub>soil, plateau</sub> (mg/kg dry soil) | TER                        | Trigger |
|----------------------------|-----------------------------------------------|----------------------------|-------------------------------------------|-----------------------------------------------|----------------------------|---------|
| <i>Folsomia candida</i>    | Tribenuron methyl 50SG + DPX-KG691 surfactant | 30.8 <sup>a</sup>          | <b>0.030<sup>a</sup></b>                  | n.a.                                          | 1027                       | 5       |
|                            | IN-00581                                      | 100                        | 0.005                                     | <b>0.006</b>                                  | 16667                      | 5       |
|                            | IN-A4098                                      | 37.1                       | 0.001                                     | <b>0.001</b>                                  | 37100                      | 5       |
|                            | IN-D5803                                      | 100                        | <b>0.008</b>                              | n.a.                                          | 12500                      | 5       |
|                            | IN-GK521                                      | 100                        | <b>0.009</b>                              | n.a.                                          | 11111                      | 5       |
|                            | IN-L5296                                      | 0.116                      | 0.010                                     | <b>0.013</b>                                  | 9                          | 5       |
|                            | IN-R9803                                      | 100                        | <b>0.003</b>                              | n.a.                                          | 33333                      | 5       |
|                            | IN-R9805                                      | 100                        | 0.001                                     | <b>0.001</b>                                  | 100000                     | 5       |
| M2                         | 3                                             | <b>0.002</b>               | n.a.                                      | 1500                                          | 5                          |         |
| <i>Hypoaspis aculeifer</i> | Tribenuron-methyl                             | No reliable data available | <b>0.030</b>                              | n.a.                                          | No reliable data available | 5       |
|                            | IN-00581                                      | 100                        | 0.005                                     | <b>0.006</b>                                  | 16667                      | 5       |
|                            | IN-A4098                                      | 100                        | 0.001                                     | <b>0.001</b>                                  | 100000                     | 5       |
|                            | IN-D5803                                      | 100                        | <b>0.008</b>                              | n.a.                                          | 12500                      | 5       |
|                            | IN-GK521                                      | 25                         | <b>0.009</b>                              | n.a.                                          | 2778                       | 5       |
|                            | IN-L5296                                      | 403 (EC <sub>10</sub> )    | 0.010                                     | <b>0.013</b>                                  | 31000                      | 5       |
|                            | IN-R9803                                      | 100                        | <b>0.003</b>                              | n.a.                                          | 33333                      | 5       |
|                            | IN-R9805                                      | 50                         | 0.001                                     | <b>0.001</b>                                  | 50000                      | 5       |
| M2                         | No data available                             | <b>0.002</b>               | n.a.                                      | No data available                             | 5                          |         |

<sup>a</sup> Expressed as mg tribenuron-methyl / kg dry soil

n.a. Not applicable, since DT<sub>50</sub> < 3 months.

### Effects on terrestrial non target higher plants (Regulation (EU) N° 283/2013, Annex Part A, point 8.6 and Regulation (EU) N° 284/2013 Annex Part A, point 10.6)

#### Screening data

Not required for herbicides or plant growth regulators as ER<sub>50</sub> tests should be provided

#### Laboratory dose response tests

| Deterministic risk assessment covering applications up to 30 g a.s./ha |                                                     |                                                |                                        |                                                                                                                     |     |         |
|------------------------------------------------------------------------|-----------------------------------------------------|------------------------------------------------|----------------------------------------|---------------------------------------------------------------------------------------------------------------------|-----|---------|
| Species                                                                | Test substance                                      | ER <sub>50</sub> (g a.s./ha) vegetative vigour | ER <sub>50</sub> (g a.s./ha) emergence | Exposure (g a.s./ha) <sup>a</sup>                                                                                   | TER | Trigger |
| <i>Beta vulgaris</i> (sugar beet)                                      | Tribenuron-methyl technical + 0.25% X-77 surfactant | 0.155                                          | 5.5                                    | 0.0218 g a.s./ha based on total drift reduction of 97.4%* (considering 75% reduction by nozzles + 10 m buffer zone) |     |         |
| <i>Brassica napus</i> (oilseed rape)                                   |                                                     | 0.532                                          | 14.7                                   |                                                                                                                     |     |         |
| <i>Lycopersicon esculentum</i> (tomato)                                |                                                     | 0.910                                          | > 17.5                                 |                                                                                                                     |     |         |
| <i>Cucumis sativus</i> (cucumber)                                      |                                                     | 0.455                                          | > 17.5                                 |                                                                                                                     |     |         |
| <i>Pisum sativum</i> (pea)                                             |                                                     | > 17.5                                         | > 17.5                                 |                                                                                                                     |     |         |
| <i>Glycine max</i> (soybean)                                           |                                                     | 1.19                                           | > 17.5                                 |                                                                                                                     |     |         |
| <i>Sorghum bicolor</i> (sorghum)                                       |                                                     | > 17.5                                         | > 17.5                                 |                                                                                                                     |     |         |
| <i>Triticum aestivum</i> (wheat)                                       |                                                     | > 17.5                                         | > 17.5                                 |                                                                                                                     |     |         |
| <i>Zea mays</i> (corn)                                                 |                                                     | 5.95                                           | > 17.5                                 |                                                                                                                     |     |         |
| <i>Allium cepa</i> (onion)                                             |                                                     | 3.50                                           | > 17.5                                 |                                                                                                                     |     |         |
| <i>Allium cepa</i> (onion)                                             | Tribenuron methyl 50SG                              | 12.2                                           | n.a.                                   |                                                                                                                     |     |         |
| <i>Beta vulgaris</i> (sugar beet)                                      |                                                     | 0.267                                          | n.a.                                   |                                                                                                                     |     |         |
| <i>Zea mays</i> (corn)                                                 | Tribenuron methyl 50SG                              | > 17.5                                         | > 17.5                                 |                                                                                                                     |     |         |
| <i>Avena sativa</i> (oat)                                              |                                                     | 5.81                                           | > 17.5                                 |                                                                                                                     |     |         |

| <b>Deterministic risk assessment covering applications up to 30 g a.s./ha</b> |                                                                |                                                         |                                              |                                                                                                                                                 |            |          |                                       |     |         |
|-------------------------------------------------------------------------------|----------------------------------------------------------------|---------------------------------------------------------|----------------------------------------------|-------------------------------------------------------------------------------------------------------------------------------------------------|------------|----------|---------------------------------------|-----|---------|
| Species                                                                       | Test substance                                                 | ER <sub>50</sub><br>(g a.s./ha)<br>vegetative<br>vigour | ER <sub>50</sub><br>(g a.s./ha)<br>emergence | Exposure<br>(g a.s./ha) <sup>a)</sup>                                                                                                           | TER        | Trigger  |                                       |     |         |
| <i>Allium cepa</i> (onion)                                                    | + DPX-<br>KG691<br>surfactant                                  | 2.62                                                    | 7.78                                         |                                                                                                                                                 | <b>5.9</b> | <b>5</b> |                                       |     |         |
| <i>Lolium perenne</i> (ryegrass)                                              |                                                                | -                                                       | 11.9                                         |                                                                                                                                                 |            |          |                                       |     |         |
| <i>Sorghum bicolor</i> (sorghum)                                              |                                                                | 8.45                                                    | > 17.5                                       |                                                                                                                                                 |            |          |                                       |     |         |
| <i>Cucumis sativus</i> (cucumber)                                             |                                                                | 0.154                                                   | > 17.5                                       |                                                                                                                                                 |            |          |                                       |     |         |
| <i>Brassica napus</i> (oilseed rape)                                          |                                                                | 0.549                                                   | 5.97                                         |                                                                                                                                                 |            |          |                                       |     |         |
| <i>Pisum sativum</i> (pea)                                                    |                                                                | 2.05                                                    | > 17.5                                       |                                                                                                                                                 |            |          |                                       |     |         |
| <i>Glycine max</i> (soy bean)                                                 |                                                                | 1.08                                                    | > 17.5                                       |                                                                                                                                                 |            |          |                                       |     |         |
| <i>Beta vulgaris</i> (sugar beet)                                             |                                                                | <b>0.128<sup>b</sup></b>                                | 2.09                                         |                                                                                                                                                 |            |          |                                       |     |         |
| <i>Lycopersicon esculentum</i> (tomato)                                       |                                                                | 0.280                                                   | 14.2                                         |                                                                                                                                                 |            |          |                                       |     |         |
| <i>Zea mays</i> (corn)                                                        | Tribenuron<br>methyl 50SG                                      | > 17.5                                                  | n.a.                                         |                                                                                                                                                 |            |          |                                       |     |         |
| <i>Avena saliva</i> (oat)                                                     |                                                                | > 17.5                                                  | n.a.                                         |                                                                                                                                                 |            |          |                                       |     |         |
| <i>Allium cepa</i> (onion)                                                    |                                                                | > 17.5                                                  | n.a.                                         |                                                                                                                                                 |            |          |                                       |     |         |
| <i>Sorghum bicolor</i> (sorghum)                                              |                                                                | > 17.5                                                  | n.a.                                         |                                                                                                                                                 |            |          |                                       |     |         |
| <i>Cucumis sativus</i> (cucumber)                                             |                                                                | 0.449                                                   | n.a.                                         |                                                                                                                                                 |            |          |                                       |     |         |
| <i>Brassica napus</i> (oilseed rape)                                          |                                                                | 2.30                                                    | n.a.                                         |                                                                                                                                                 |            |          |                                       |     |         |
| <i>Pisum sativum</i> (pea)                                                    |                                                                | > 17.5                                                  | n.a.                                         |                                                                                                                                                 |            |          |                                       |     |         |
| <i>Glycine max</i> (soy bean)                                                 |                                                                | 12.0                                                    | n.a.                                         |                                                                                                                                                 |            |          |                                       |     |         |
| <i>Beta vulgaris</i> (sugar beet)                                             |                                                                | 0.856                                                   | n.a.                                         |                                                                                                                                                 |            |          |                                       |     |         |
| <i>Lycopersicon esculentum</i> (tomato)                                       | 2.56                                                           | n.a.                                                    |                                              |                                                                                                                                                 |            |          |                                       |     |         |
| <i>Avena sativa</i> (winter oat)                                              | Tribenuron<br>methyl 75WG                                      | > 30.0                                                  | n.a.                                         |                                                                                                                                                 |            |          |                                       |     |         |
| <i>Beta vulgaris</i> (sugar beet)                                             |                                                                | 1.43                                                    | n.a.                                         |                                                                                                                                                 |            |          |                                       |     |         |
| <i>Brassica napus</i> (oilseed rape)                                          | Tribenuron-<br>Methyl 750<br>g/kg WG                           | 1.66                                                    | >9.44                                        |                                                                                                                                                 |            |          |                                       |     |         |
| <i>Beta vulgaris</i> (sugar beet)                                             |                                                                | 0.10                                                    | 3.44                                         |                                                                                                                                                 |            |          |                                       |     |         |
| <i>Pisum sativum</i> (pea)                                                    |                                                                | > 30.60                                                 | >30.60                                       |                                                                                                                                                 |            |          |                                       |     |         |
| <i>Solanum lycopersicon</i> (tomato)                                          |                                                                | 1.67                                                    | >9.44                                        |                                                                                                                                                 |            |          |                                       |     |         |
| <i>Allium cepa</i> (onion)                                                    |                                                                | > 30.60                                                 | 1.32                                         |                                                                                                                                                 |            |          |                                       |     |         |
| <i>Lolium multiflorum</i> (ryegrass)                                          |                                                                | > 30.60                                                 | 22.47                                        |                                                                                                                                                 |            |          |                                       |     |         |
| <b>Probabilistic risk assessment covering applications up to 30 g a.s./ha</b> |                                                                |                                                         |                                              |                                                                                                                                                 |            |          |                                       |     |         |
| Species                                                                       | Test substance                                                 | ER <sub>50</sub><br>(g a.s./ha)<br>vegetative<br>vigour | HR <sub>5</sub><br>(g a.s./ha)               |                                                                                                                                                 |            |          | Exposure<br>(g a.s./ha) <sup>a)</sup> | TER | Trigger |
| <i>Zea mays</i> (corn)                                                        | Tribenuron<br>methyl 50SG<br><br>+ DPX-<br>KG691<br>surfactant | > 17.5                                                  | <b>0.072<sup>c</sup></b>                     | 0.0435 g a.s./ha<br><br>based on total<br>drift reduction of<br>94.8%<br><br>(considering 50%<br>reduction by<br>nozzles + 10 m<br>buffer zone) | <b>1.7</b> | <b>1</b> |                                       |     |         |
| <i>Avena sativa</i> (oat)                                                     |                                                                | 5.81                                                    |                                              |                                                                                                                                                 |            |          |                                       |     |         |
| <i>Allium cepa</i> (onion)                                                    |                                                                | 2.62                                                    |                                              |                                                                                                                                                 |            |          |                                       |     |         |
| <i>Sorghum bicolor</i> (sorghum)                                              |                                                                | 8.45                                                    |                                              |                                                                                                                                                 |            |          |                                       |     |         |
| <i>Cucumis sativus</i> (cucumber)                                             |                                                                | 0.154                                                   |                                              |                                                                                                                                                 |            |          |                                       |     |         |
| <i>Brassica napus</i> (oilseed rape)                                          |                                                                | 0.549                                                   |                                              |                                                                                                                                                 |            |          |                                       |     |         |
| <i>Pisum sativum</i> (pea)                                                    |                                                                | 2.05                                                    |                                              |                                                                                                                                                 |            |          |                                       |     |         |
| <i>Glycine max</i> (soy bean)                                                 |                                                                | 1.08                                                    |                                              |                                                                                                                                                 |            |          |                                       |     |         |
| <i>Beta vulgaris</i> (sugar beet)                                             |                                                                | 0.128                                                   |                                              |                                                                                                                                                 |            |          |                                       |     |         |
| <i>Lycopersicon esculentum</i> (tomato)                                       |                                                                | 0.280                                                   |                                              |                                                                                                                                                 |            |          |                                       |     |         |

a) Exposure is calculated based on the highest proposed application rate and with drift data according to Rautmann et al., 2001.

b) Agreed endpoint for the deterministic risk assessment of both representative formulations, based on shoot dry weight for sugar beet (discussed at PPR 157)

c) Agreed endpoint for the probabilistic assessment of both representative formulations (discussed at PPR 157)

n.a. Not available

\* Above the 95% limit applicable for the risk mitigation measures.

#### Effects on biological methods for sewage treatment (Regulation (EU) N° 283/2013, Annex Part A, point 8.8)

| Test type/organism | End point                            |
|--------------------|--------------------------------------|
| Activated sludge   | 3-h EC <sub>50</sub> >2040 mg a.s./L |

#### Monitoring data (Regulation (EU) N° 283/2013, Annex Part A, point 8.9 and Regulation (EU) N° 284/2013, Annex Part A, point 10.8)

No monitoring data are available concerning adverse effect of the a.s. or of the PPP.

#### Definition of the residue for monitoring (Regulation (EU) N° 283/2013, Annex Part A, point 7.4.2) Ecotoxicologically relevant compounds<sup>a)</sup>

| Compartment |                                              |
|-------------|----------------------------------------------|
| soil        | Tribenuron-methyl, IN-L5296 (triazine-amine) |
| water       | Tribenuron-methyl                            |
| sediment    | Tribenuron-methyl                            |
| groundwater | Tribenuron-methyl                            |

a) metabolites are considered relevant when, based on the risk assessment, they pose a risk comparable or higher than the parent

#### Classification and labelling with regard to ecotoxicological data (Regulation (EU) N° 283/2013, Annex Part A, Section 10)

Substance

Harmonised classification according to Regulation (EC) No 1272/2008 and its Adaptations to Technical Process [Table 3.1 of Annex VI of Regulation (EC) No 1272/2008 as amended]<sup>9</sup>:

Peer review proposal<sup>10</sup> for harmonised classification according to Regulation (EC) No 1272/2008:

| name                                           |
|------------------------------------------------|
| Acute 1, H400<br>Chronic 1, H410               |
| Acute 1, H400; M=100<br>Chronic 1, H410; M=100 |

<sup>9</sup> Regulation (EC) No 1272/2008 of the European Parliament and of the Council of 16 December 2008 on classification, labelling and packaging of substances and mixtures, amending and repealing Directives 67/548/EEC and 1999/45/EC, and amending Regulation (EC) No 1907/2006. OJ L 353, 31.12.2008, 1-1355.

<sup>10</sup> It should be noted that harmonised classification and labelling is formally proposed and decided in accordance with Regulation (EC) No 1272/2008.
